# Supplementary material for: Unique behaviour of dinitrogen-bridged dimolybdenum complexes bearing pincer ligand towards catalytic formation of ammonia
Source: Springer Nature journal article supplement (doi:10.1038/ncomms4737), 2014-04-28
Supplement: 41467_2014_BFncomms4737_MOESM3_ESM.mol [file 41467_2014_BFncomms4737_MOESM3_ESM.mol]

  ChemDraw04231410402D

 29 26  0  0  0  0  0  0  0  0999 V2000
    0.1775   -0.0553    0.0000 Mo  0  0  0  0  0  0  0  0  0  0  0  0
   -1.0113    0.3560    0.0000 C   0  0  0  0  0  0  0  0  0  0  0  0
   -1.7710    0.3767    0.0000 C   0  0  0  0  0  0  0  0  0  0  0  0
   -2.4304   -0.0205    0.0000 C   0  0  0  0  0  0  0  0  0  0  0  0
   -2.2265   -0.5418    0.0000 C   0  0  0  0  0  0  0  0  0  0  0  0
   -1.5082   -0.5418    0.0000 C   0  0  0  0  0  0  0  0  0  0  0  0
   -0.8074   -0.0619    0.0000 N   0  0  0  0  0  0  0  0  0  0  0  0
   -0.5091    0.7071    0.0000 C   0  0  0  0  0  0  0  0  0  0  0  0
   -1.1714   -1.0060    0.0000 C   0  0  0  0  0  0  0  0  0  0  0  0
    0.7998    0.7123    0.0000 P   0  0  0  0  0  0  0  0  0  0  0  0
   -0.5754   -1.0060    0.0000 P   0  0  0  0  0  0  0  0  0  0  0  0
    1.2137    1.4292    0.0000 C   0  0  0  0  0  0  0  0  0  0  0  0
    0.7210    2.0910    0.0000 C   0  0  0  0  0  0  0  0  0  0  0  0
    1.4503    2.2196    0.0000 C   0  0  0  0  0  0  0  0  0  0  0  0
    1.9889    1.7114    0.0000 C   0  0  0  0  0  0  0  0  0  0  0  0
    1.6276    0.7123    0.0000 C   0  0  0  0  0  0  0  0  0  0  0  0
    2.2596    1.2426    0.0000 C   0  0  0  0  0  0  0  0  0  0  0  0
    2.4304    0.5220    0.0000 C   0  0  0  0  0  0  0  0  0  0  0  0
    1.9544   -0.0452    0.0000 C   0  0  0  0  0  0  0  0  0  0  0  0
   -1.2924   -1.4199    0.0000 C   0  0  0  0  0  0  0  0  0  0  0  0
   -2.0920   -1.2057    0.0000 C   0  0  0  0  0  0  0  0  0  0  0  0
   -2.0093   -1.8339    0.0000 C   0  0  0  0  0  0  0  0  0  0  0  0
   -1.5066   -2.2196    0.0000 C   0  0  0  0  0  0  0  0  0  0  0  0
    0.1416   -1.4199    0.0000 C   0  0  0  0  0  0  0  0  0  0  0  0
    0.3558   -2.2196    0.0000 C   0  0  0  0  0  0  0  0  0  0  0  0
    0.7270   -2.0053    0.0000 C   0  0  0  0  0  0  0  0  0  0  0  0
    0.9694   -1.4199    0.0000 C   0  0  0  0  0  0  0  0  0  0  0  0
    1.3511   -0.4852    0.0000 Cl  0  5  0  0  0  0  0  0  0  0  0  0
    0.1677    1.1020    0.0000 N   0  7  0  0  0  0  0  0  0  0  0  0
  2  3  2  0      
  3  4  1  0      
  4  5  2  0      
  5  6  1  0      
  6  7  2  0      
  7  2  1  0      
  8 10  1  0      
  9 11  1  0      
  2  8  1  0      
  6  9  1  0      
 10 12  1  0      
 12 13  1  0      
 12 14  1  0      
 12 15  1  0      
 10 16  1  0      
 16 17  1  0      
 16 18  1  0      
 16 19  1  0      
 11 20  1  0      
 20 21  1  0      
 20 22  1  0      
 20 23  1  0      
 11 24  1  0      
 24 25  1  0      
 24 26  1  0      
 24 27  1  0      
M  CHG  3   1   4  28  -1  29  -3
M  END
