# Supplementary material for: Unique behaviour of dinitrogen-bridged dimolybdenum complexes bearing pincer ligand towards catalytic formation of ammonia
Source: PubMed Central journal article supplement (PMC4015321; doi:10.1038/ncomms4737), 2014-04-28
Supplement: ncomms4737-s1.pdf [file ncomms4737-s1.pdf]

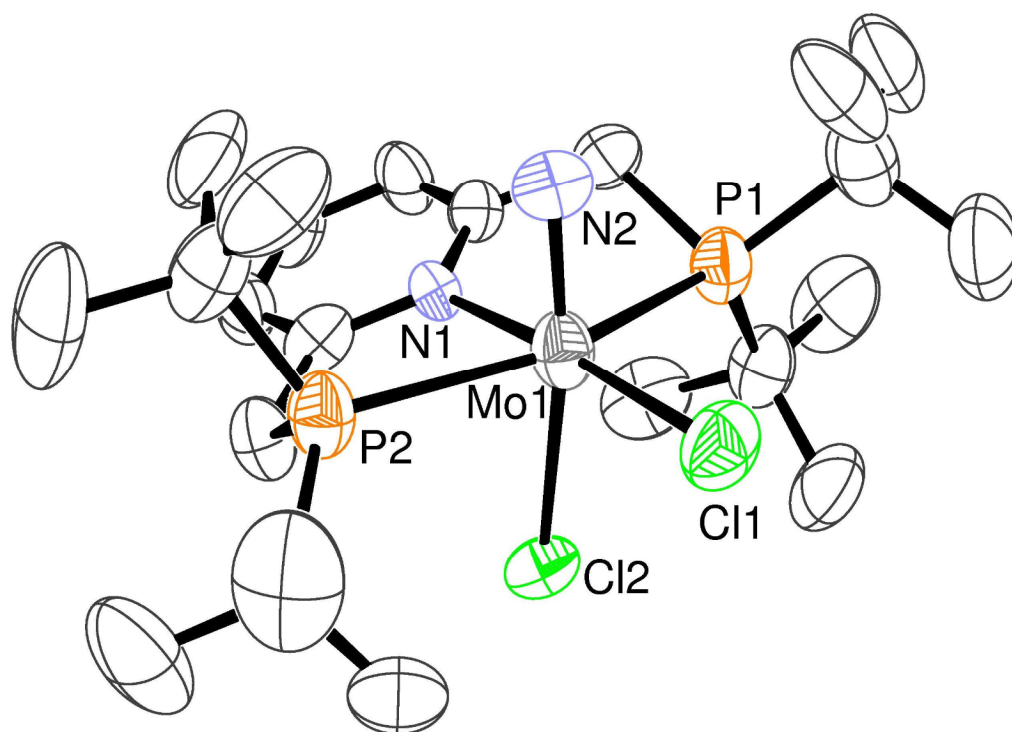

**Supplementary Figure 1 | ORTEP drawing of 2. Thermal ellipsoids are shown at the 50% probability level. One of the two crystallographically disordered molecules is shown. All hydrogen atoms are omitted for clarity.**

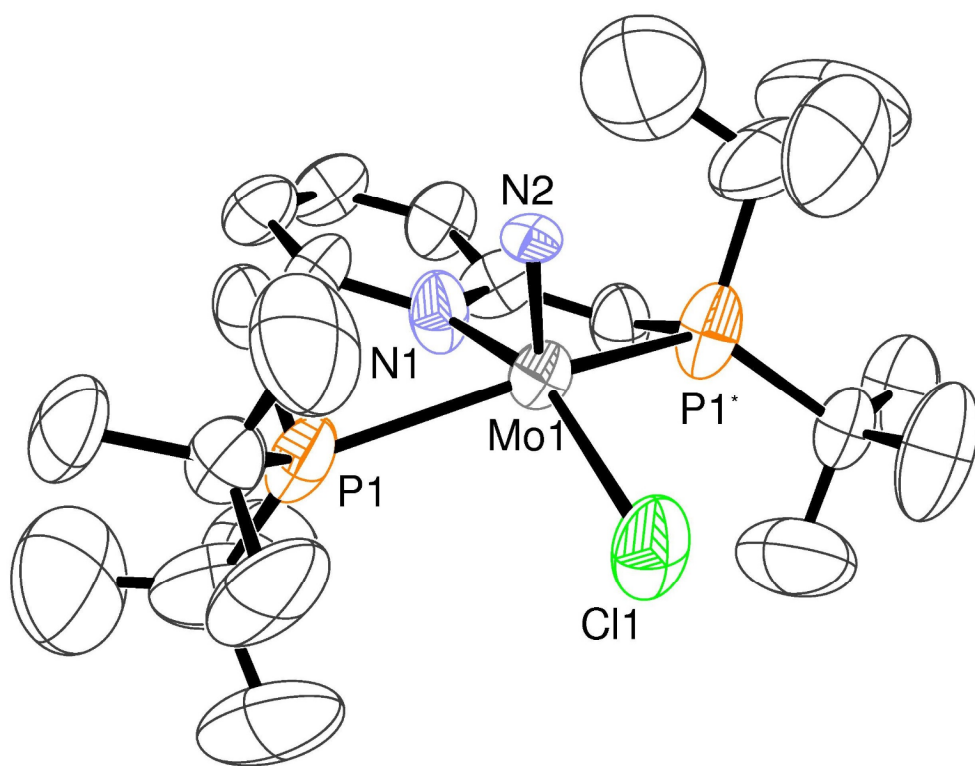

**Supplementary Figure 2 | ORTEP drawing of 3. Thermal ellipsoids are shown at the 50% probability level. One of the two crystallographically disordered molecules is shown. All hydrogen atoms are omitted for clarity.**

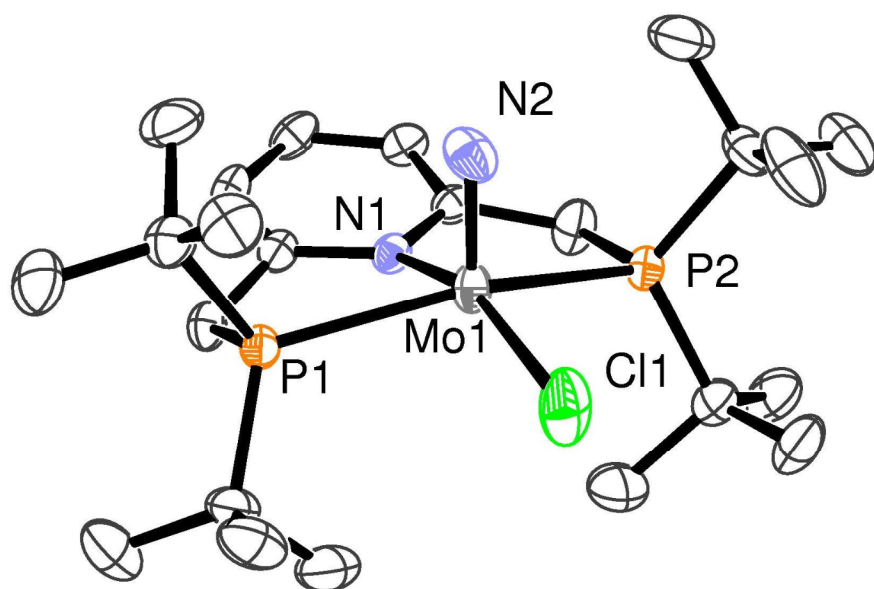

**Supplementary Figure 3 | ORTEP drawing of the cationic part of 4. Thermal ellipsoids are shown at the 50% probability level. All hydrogen atoms are omitted for clarity.**

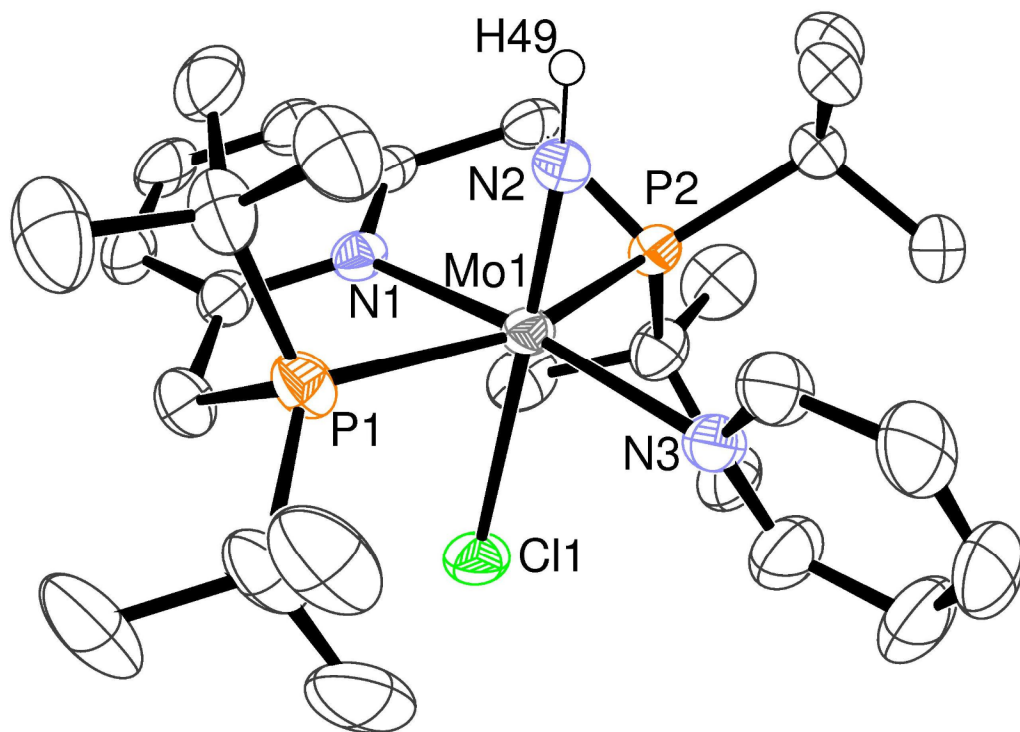

**Supplementary Figure 4 | ORTEP drawing of the cationic part of 5. Thermal ellipsoids are shown at the 50% probability level. All hydrogen atoms except for H(49) are omitted for clarity.**

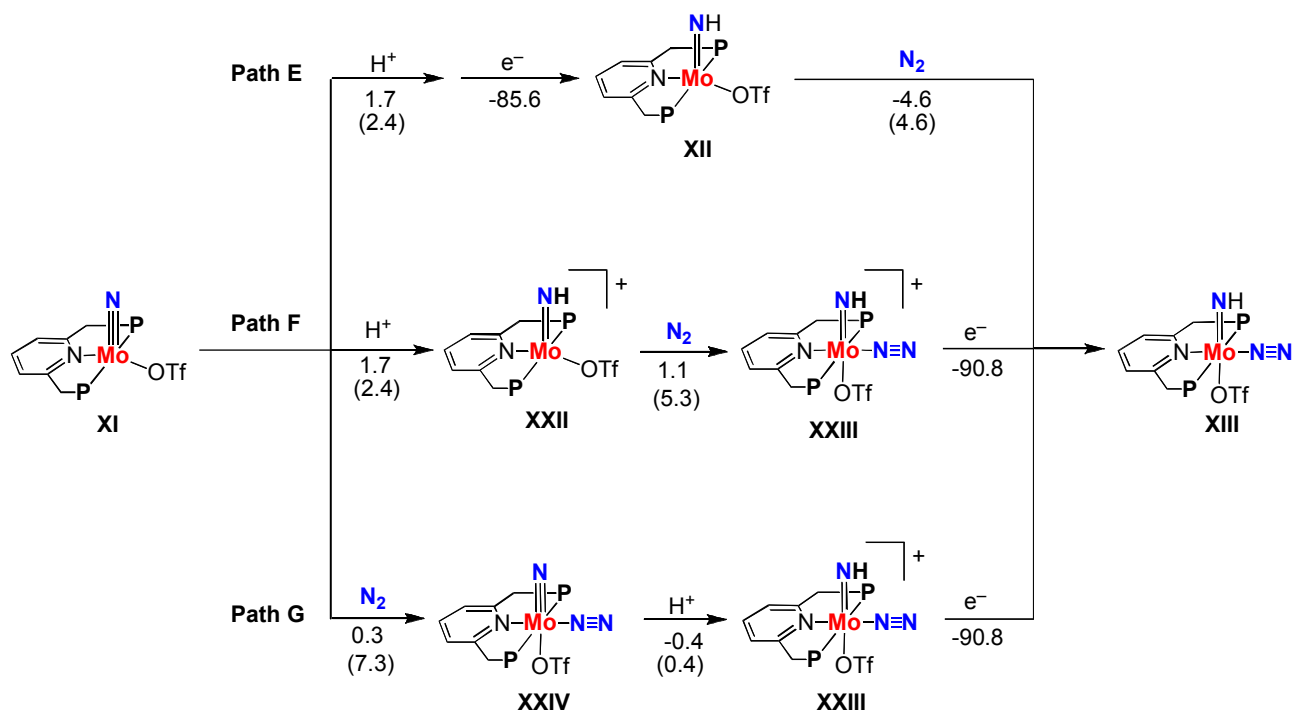

Supplementary Figure 5 | Three possible reaction pathways for formation of the six-coordinate imide complex XIII. Protons and electrons are supplied by lutidinium and cobaltocene, respectively. Energy changes and activation energies (in parenthesis) for individual reaction steps were calculated at the B3LYP\*/BS2 level of theory (units in kcal/mol).

**Supplementary Table 1 | X-ray Crystallographic Data for 2·7/3C<sub>4</sub>H<sub>8</sub>O and 3·1/6C<sub>6</sub>H<sub>14</sub>.**

|                                                               | <b>2·7/3C<sub>4</sub>H<sub>8</sub>O</b>                                                                 | <b>3·1/6C<sub>6</sub>H<sub>14</sub></b>                              |
|---------------------------------------------------------------|---------------------------------------------------------------------------------------------------------|----------------------------------------------------------------------|
| chemical formula                                              | C <sub>32.33</sub> H <sub>61.67</sub> Cl <sub>2</sub> MoN <sub>2</sub> O <sub>2.33</sub> P <sub>2</sub> | C <sub>24</sub> H <sub>44.33</sub> ClMoN <sub>2</sub> P <sub>2</sub> |
| formula weight                                                | 744.56                                                                                                  | 554.30                                                               |
| dimensions of crystals                                        | 0.30 × 0.20 × 0.15                                                                                      | 0.35 × 0.15 × 0.15                                                   |
| crystal system                                                | trigonal                                                                                                | hexagonal                                                            |
| space group                                                   | <i>R</i> $\bar{3}$                                                                                      | <i>P</i> 6 <sub>1</sub> 22                                           |
| <i>a</i> , Å                                                  | 36.248(1)                                                                                               | 16.3159(5)                                                           |
| <i>b</i> , Å                                                  | 36.248(1)                                                                                               | 16.3159(5)                                                           |
| <i>c</i> , Å                                                  | 17.0202(5)                                                                                              | 19.6989(5)                                                           |
| $\alpha$ , deg                                                | 90                                                                                                      | 90                                                                   |
| $\beta$ , deg                                                 | 90                                                                                                      | 90                                                                   |
| $\gamma$ , deg                                                | 120                                                                                                     | 120                                                                  |
| <i>V</i> , Å <sup>3</sup>                                     | 19366.9(9)                                                                                              | 4541.4(2)                                                            |
| <i>Z</i>                                                      | 18                                                                                                      | 6                                                                    |
| $\rho_{\text{calcd}}$ , g cm <sup>-3</sup>                    | 1.149                                                                                                   | 1.216                                                                |
| <i>F</i> (000)                                                | 7097.22                                                                                                 | 1747.98                                                              |
| $\mu$ , cm <sup>-1</sup>                                      | 5.291                                                                                                   | 6.387                                                                |
| trans. factors range                                          | 0.518–0.924                                                                                             | 0.908–0.909                                                          |
| no. reflections measured                                      | 49604                                                                                                   | 44063                                                                |
| no. unique reflections                                        | 9648 ( <i>R</i> <sub>int</sub> = 0.073)                                                                 | 3467 ( <i>R</i> <sub>int</sub> = 0.053)                              |
| no. parameters refined                                        | 364                                                                                                     | 168                                                                  |
| <i>R</i> 1 ( <i>I</i> > 2 $\sigma$ ( <i>I</i> )) <sup>a</sup> | 0.0790                                                                                                  | 0.1103                                                               |
| <i>wR</i> 2 (all data) <sup>b</sup>                           | 0.1725                                                                                                  | 0.2165                                                               |
| GOF (all data) <sup>c</sup>                                   | 1.000                                                                                                   | 1.000                                                                |
| Flack parameters                                              |                                                                                                         | 0.10(15)                                                             |
| max diff peak / hole, e Å <sup>-3</sup>                       | 3.11/–1.35                                                                                              | 1.37/–1.30                                                           |
| CCDC number                                                   | 986840                                                                                                  | 986841                                                               |

<sup>a</sup>  $R1 = \sum ||F_o| - |F_c|| / \sum |F_o|$ . <sup>b</sup>  $wR2 = [\sum w(F_o^2 - F_c^2)^2 / \sum w(F_o^2)^2]^{1/2}$ ,  $w = 4F_o^2 / q\sigma(F_o^2)$

[ $q = 8.9$  (2·7/3C<sub>4</sub>H<sub>8</sub>O);  $q = 62.2$  (3·1/6C<sub>6</sub>H<sub>14</sub>)]. <sup>c</sup>  $GOF = [\sum w(F_o^2 - F_c^2)^2 / (N_o - N_{\text{params}})]^{1/2}$

**Supplementary Table 2 | X-ray Crystallographic Data for 4 and 5·C<sub>4</sub>H<sub>8</sub>O.**

|                                               | <b>4</b>                                                                                          | <b>5·C<sub>4</sub>H<sub>8</sub>O</b>                                                              |
|-----------------------------------------------|---------------------------------------------------------------------------------------------------|---------------------------------------------------------------------------------------------------|
| chemical formula                              | C <sub>24</sub> H <sub>43</sub> ClF <sub>3</sub> MoN <sub>2</sub> O <sub>3</sub> P <sub>2</sub> S | C <sub>33</sub> H <sub>57</sub> ClF <sub>3</sub> MoN <sub>3</sub> O <sub>4</sub> P <sub>2</sub> S |
| formula weight                                | 690.01                                                                                            | 842.23                                                                                            |
| dimensions of crystals                        | 0.20 × 0.20 × 0.10                                                                                | 0.12 × 0.08 × 0.03                                                                                |
| crystal system                                | monoclinic                                                                                        | monoclinic                                                                                        |
| space group                                   | <i>C2/c</i>                                                                                       | <i>P2<sub>1</sub>/c</i>                                                                           |
| <i>a</i> , Å                                  | 33.3044(7)                                                                                        | 16.4904(4)                                                                                        |
| <i>b</i> , Å                                  | 15.2043(3)                                                                                        | 16.7621(3)                                                                                        |
| <i>c</i> , Å                                  | 13.0074(3)                                                                                        | 16.7720(4)                                                                                        |
| $\alpha$ , deg                                | 90                                                                                                | 90                                                                                                |
| $\beta$ , deg                                 | 109.7844(7)                                                                                       | 119.0773(7)                                                                                       |
| $\gamma$ , deg                                | 90                                                                                                | 90                                                                                                |
| <i>V</i> , Å <sup>3</sup>                     | 6197.8(3)                                                                                         | 4051.7(2)                                                                                         |
| <i>Z</i>                                      | 8                                                                                                 | 4                                                                                                 |
| $\rho_{\text{calcd}}$ , g cm <sup>-3</sup>    | 1.479                                                                                             | 1.381                                                                                             |
| <i>F</i> (000)                                | 2856                                                                                              | 1760                                                                                              |
| $\mu$ , cm <sup>-1</sup>                      | 7.250                                                                                             | 5.707                                                                                             |
| trans. factors range                          | 0.692–0.930                                                                                       | 0.778–0.983                                                                                       |
| no. reflections measured                      | 29891                                                                                             | 39582                                                                                             |
| no. unique reflections                        | 7092 ( $R_{\text{int}} = 0.035$ )                                                                 | 9260 ( $R_{\text{int}} = 0.055$ )                                                                 |
| no. parameters refined                        | 377                                                                                               | 493                                                                                               |
| <i>R</i> 1 ( $I > 2 \sigma(I)$ ) <sup>a</sup> | 0.0516                                                                                            | 0.0449                                                                                            |
| <i>wR</i> 2 (all data) <sup>b</sup>           | 0.1050                                                                                            | 0.0718                                                                                            |
| GOF (all data) <sup>c</sup>                   | 1.029                                                                                             | 1.000                                                                                             |
| Flack parameters                              |                                                                                                   |                                                                                                   |
| max diff peak / hole, e Å <sup>-3</sup>       | 4.70/–1.36                                                                                        | 0.81/–0.78                                                                                        |
| CCDC number                                   | 973752                                                                                            | 986842                                                                                            |

<sup>a</sup>  $R1 = \sum ||F_o| - |F_c|| / \sum |F_o|$ . <sup>b</sup>  $wR2 = [\sum w(F_o^2 - F_c^2)^2 / \sum w(F_o^2)^2]^{1/2}$ ,  $w = 4F_o^2 / q\sigma(F_o^2)$

[ $q = 12.0$  (**4**);  $q = 3.545$  (**5·C<sub>4</sub>H<sub>8</sub>O**)]. <sup>c</sup>  $GOF = [\sum w(F_o^2 - F_c^2)^2 / (N_o - N_{\text{params}})]^{1/2}$

**Supplementary Table 3 | Selected Bond Lengths (Å) and Angles (deg) for 2·7/3C<sub>4</sub>H<sub>8</sub>O.**

---

|             |            |                 |           |
|-------------|------------|-----------------|-----------|
| Mo(1)–N(1)  | 2.205(6)   | P(1)–Mo(1)–N(1) | 77.69(14) |
| Mo(1)–N(2)  | 1.745(12)  | P(2)–Mo(1)–N(1) | 77.86(14) |
| Mo(1)–P(1)  | 2.5971(19) |                 |           |
| Mo(1)–P(2)  | 2.591(3)   |                 |           |
| Mo(1)–Cl(1) | 2.407(2)   |                 |           |
| Mo(1)–Cl(2) | 2.602(4)   |                 |           |

---



**Supplementary Table 4 | Selected Bond Lengths (Å) and Angles (deg) for 3·1/6C<sub>6</sub>H<sub>14</sub>.**

---

|             |          |                  |           |
|-------------|----------|------------------|-----------|
| Mo(1)–N(1)  | 2.202(7) | P(1)–Mo(1)–N(1)  | 74.92(14) |
| Mo(1)–N(2)  | 1.733(9) | P(1)*–Mo(1)–N(1) | 78.14(14) |
| Mo(1)–P(1)  | 2.588(3) |                  |           |
| Mo(1)–P(1)* | 2.437(3) |                  |           |
| Mo(1)–Cl(1) | 2.440(3) |                  |           |

---

**Supplementary Table 5 | Selected Bond Lengths (Å) and Angles (deg) for 4.**

---

|             |           |                 |          |
|-------------|-----------|-----------------|----------|
| Mo(1)–N(1)  | 2.227(3)  | P(1)–Mo(1)–N(1) | 79.30(8) |
| Mo(1)–N(2)  | 1.634(3)  | P(2)–Mo(1)–N(1) | 79.08(8) |
| Mo(1)–P(1)  | 2.5421(9) |                 |          |
| Mo(1)–P(2)  | 2.540(1)  |                 |          |
| Mo(1)–Cl(1) | 2.374(1)  |                 |          |

---

**Supplementary Table 6 | Selected Bond lengths (Å) and Angles (deg) for 5·C<sub>4</sub>H<sub>8</sub>O.**

---

|             |           |                  |           |
|-------------|-----------|------------------|-----------|
| Mo(1)–N(1)  | 2.184(3)  | P(1)–Mo(1)–N(1)  | 78.90(6)  |
| Mo(1)–N(2)  | 1.711(3)  | P(2)–Mo(1)–N(1)  | 78.98(6)  |
| Mo(1)–N(3)  | 2.225(3)  | Mo(1)–N(2)–H(49) | 172.3(13) |
| Mo(1)–P(1)  | 2.5209(7) |                  |           |
| Mo(1)–P(2)  | 2.5564(9) |                  |           |
| Mo(1)–Cl(1) | 2.4993(8) |                  |           |

---

## Supplementary Table 7 | Cartesian coordinate of 1. Units are presented in Å.

SCF energy (in toluene) = -3962.57531261 hartree

ZPE = 1.284946 hartree

---

| Atom | Coordinates (Angstroms) |              |              |
|------|-------------------------|--------------|--------------|
|      | X                       | Y            | Z            |
| Mo   | -2.635377403            | 0.091684026  | -0.007458813 |
| Mo   | 2.635380273             | -0.091673298 | -0.007498766 |
| P    | 3.257938643             | 2.072237977  | -1.172523258 |
| P    | -3.257930861            | -2.072244635 | -1.172454287 |
| N    | -4.874109596            | 0.176550058  | 0.016403149  |
| N    | 4.874111726             | -0.176565357 | 0.01632513   |
| P    | 3.064974045             | -2.293917874 | 1.177333274  |
| P    | -3.064977138            | 2.293933267  | 1.17736402   |
| N    | -0.575598978            | 0.020135817  | -0.020344925 |
| N    | 0.575601843             | -0.020103726 | -0.020353405 |
| N    | -2.580942878            | 1.547911994  | -2.823171702 |
| N    | -2.60031816             | 1.014326216  | -1.818570178 |
| N    | -2.628893009            | -0.833551933 | 1.800962059  |
| N    | -2.625965989            | -1.368782601 | 2.805023974  |
| N    | 2.580906829             | -1.5479145   | -2.823202544 |
| N    | 2.60029284              | -1.014323536 | -1.818603747 |
| N    | 2.628930786             | 0.833577163  | 1.800914596  |
| N    | 2.626024628             | 1.368817571  | 2.804971252  |
| H    | 2.696071696             | 3.652111935  | -4.699098118 |
| H    | -2.696117575            | -3.652151969 | -4.699024141 |
| H    | -4.060564816            | -2.661077483 | -4.178901924 |
| H    | 4.060511247             | 2.661015124  | -4.178997833 |
| C    | 3.296519175             | 3.363526531  | -3.822886069 |
| C    | -3.296549734            | -3.363569215 | -3.822800781 |
| H    | -2.399405059            | -0.7702234   | -3.810361023 |
| H    | 2.39932748              | 0.770191107  | -3.810385604 |
| H    | -3.801918011            | -4.264748976 | -3.465500605 |
| H    | 3.801914063             | 4.264700003  | -3.465607313 |
| H    | -1.110738815            | -1.870053953 | -4.317945243 |
| H    | 1.11067494              | 1.870040202  | -4.31796489  |
| C    | 1.680139036             | 1.511598414  | -3.447297632 |
| C    | -1.680194137            | -1.511608973 | -3.447273564 |
| H    | 0.624030796             | 3.913124429  | -3.262969456 |
| H    | -0.624046911            | -3.913122746 | -3.262942224 |
| C    | 2.364157011             | 2.718911257  | -2.774734561 |

|   |              |              |              |
|---|--------------|--------------|--------------|
| C | -2.364174858 | -2.718924521 | -2.774678069 |
| H | -4.560176303 | -0.781957407 | -2.729426349 |
| H | 4.56014255   | 0.781924078  | -2.729508188 |
| H | 0.982272273  | 1.007568782  | -2.771137475 |
| H | -0.982325595 | -1.007553569 | -2.771134563 |
| H | 5.549454273  | 2.174134614  | -2.27791347  |
| H | -5.549464254 | -2.174176795 | -2.277804824 |
| C | 1.251025802  | 3.711230504  | -2.382215536 |
| C | -1.251016547 | -3.711218793 | -2.382172596 |
| H | 3.649490071  | 5.267175443  | -1.615209943 |
| H | -3.649479194 | -5.267191698 | -1.615101868 |
| H | 0.597053501  | 3.297948771  | -1.603769292 |
| H | -0.597025166 | -3.297910781 | -1.603756433 |
| C | 4.878942762  | 1.401904473  | -1.878771139 |
| C | -4.878955232 | -1.401935504 | -1.878679698 |
| H | 7.558132831  | 1.083664352  | -1.623890887 |
| H | -7.55814502  | -1.08373068  | -1.623750514 |
| H | 1.641724341  | 4.673412751  | -2.034207479 |
| H | -1.641690018 | -4.673399068 | -2.034131142 |
| H | 5.23316802   | 4.459834436  | -1.64053702  |
| H | -5.233157226 | -4.459849818 | -1.640408925 |
| H | -4.510453255 | 2.624133323  | -1.374739588 |
| H | 4.510481856  | -2.624167541 | -1.374750558 |
| C | 4.406524428  | 4.779202287  | -0.992587811 |
| C | -4.406502457 | -4.779212021 | -0.992471579 |
| H | -2.644473704 | 5.181525873  | -1.315718885 |
| H | 2.644413206  | -5.181506163 | -1.315747379 |
| C | 7.012103477  | 0.498016328  | -0.887594267 |
| C | -7.012109484 | -0.498069449 | -0.887469007 |
| H | 4.808315712  | 5.546514323  | -0.312993051 |
| H | -4.808282015 | -5.546516938 | -0.312861838 |
| C | 5.616357743  | 0.542006718  | -0.883073009 |
| C | -5.616363135 | -0.542040514 | -0.882974261 |
| H | -4.886748773 | 4.351052054  | -1.469889048 |
| H | 4.886711604  | -4.351100028 | -1.469898663 |
| H | -2.028622076 | 3.524102423  | -1.382682391 |
| H | 2.028624899  | -3.524060827 | -1.382738606 |
| C | -4.716922695 | 3.513944395  | -0.775981435 |
| C | 4.716909318  | -3.513987309 | -0.775991204 |
| C | -2.347894097 | 4.317248985  | -0.701537421 |
| C | 2.347854405  | -4.31721247  | -0.701579416 |
| H | -8.775888422 | 0.326640621  | 0.058867799  |
| H | 8.775889217  | -0.326708851 | 0.058716568  |
| C | 3.836256406  | 3.620069643  | -0.150935903 |
| C | -3.836219002 | -3.620071328 | -0.150842088 |
| H | -5.652226727 | 3.350819267  | -0.228012409 |
| H | 5.652212793  | -3.350899953 | -0.228010288 |

|   |              |              |              |
|---|--------------|--------------|--------------|
| C | -7.68877878  | 0.284457067  | 0.047334331  |
| C | 7.688779955  | -0.284510562 | 0.047203593  |
| H | -1.484809403 | 4.622456071  | -0.102310626 |
| H | 1.484747214  | -4.622382016 | -0.102365994 |
| H | 1.827338363  | 4.51342771   | 0.078845324  |
| H | -1.827289109 | -4.513414464 | 0.07890149   |
| H | 5.882593937  | 2.921943896  | 0.287569759  |
| H | -5.882551063 | -2.921952434 | 0.28770001   |
| C | -3.549053164 | 3.882315662  | 0.166706126  |
| C | 3.549014495  | -3.882316568 | 0.166681438  |
| C | 2.654673983  | 4.145881878  | 0.693297834  |
| C | -2.654615044 | -4.145872148 | 0.6933691    |
| C | 4.954992006  | 3.170903261  | 0.816182666  |
| C | -4.954936111 | -3.170900142 | 0.816295948  |
| H | 5.181821576  | 4.002417568  | 1.500351588  |
| H | -5.181746191 | -4.002407222 | 1.500480111  |
| H | -4.376991634 | 5.873127686  | 0.339871226  |
| H | 4.376881901  | -5.873156761 | 0.339860036  |
| C | 6.933853621  | -1.011179349 | 0.967138457  |
| C | -6.933844724 | 1.011145081  | 0.967247802  |
| H | 2.264192346  | 3.381338518  | 1.369957816  |
| H | -2.264125452 | -3.381322662 | 1.370017205  |
| C | 5.539351432  | -0.94728827  | 0.932590247  |
| C | -5.539342254 | 0.947272544  | 0.932673741  |
| C | -4.015823922 | 5.082051319  | 1.014854934  |
| C | 4.015733767  | -5.082066774 | 1.014838224  |
| H | -4.847821782 | 4.825111337  | 1.683487594  |
| H | 4.84773233   | -4.825154414 | 1.683480674  |
| H | 3.003867963  | 4.987412041  | 1.311296818  |
| H | -3.0037903   | -4.987402011 | 1.311379037  |
| H | -7.416924854 | 1.635972573  | 1.715285786  |
| H | 7.416939428  | -1.636006822 | 1.715172769  |
| H | 4.665735186  | 2.311453793  | 1.425216117  |
| H | -4.665671558 | -2.311441118 | 1.425312091  |
| H | -1.246113548 | 4.771354575  | 2.012656388  |
| H | 1.24609735   | -4.771315082 | 2.012685706  |
| C | -4.716907816 | 1.743591673  | 1.915265251  |
| C | 4.716924211  | -1.743588558 | 1.915202825  |
| H | -3.211383954 | 5.516749447  | 1.616972266  |
| H | 3.211271746  | -5.516736159 | 1.616947055  |
| H | -5.317474315 | 2.563146789  | 2.33087665   |
| H | 5.317487648  | -2.56314733  | 2.330811386  |
| H | -0.313270445 | 3.323994335  | 1.5615421    |
| H | 0.313266444  | -3.32394941  | 1.561563398  |
| C | -0.921518906 | 3.781618296  | 2.351666744  |
| C | 0.921519909  | -3.781569967 | 2.351686333  |
| H | -4.429302673 | 1.095907809  | 2.75652926   |

|   |              |              |             |
|---|--------------|--------------|-------------|
| H | 4.429340797  | -1.095893404 | 2.756465498 |
| C | -2.096540732 | 2.871965886  | 2.762553858 |
| C | 2.096558505  | -2.87192564  | 2.762544115 |
| H | -0.844450964 | 1.066357215  | 2.729603618 |
| H | 0.844487748  | -1.066302923 | 2.729597187 |
| H | -0.266494549 | 3.933147486  | 3.221958516 |
| H | 0.26650521   | -3.933079103 | 3.221989054 |
| C | -1.490711912 | 1.61647054   | 3.420722228 |
| C | 1.49075242   | -1.616418441 | 3.420710838 |
| H | -3.414049403 | 4.51126643   | 3.46856709  |
| H | 3.414062116  | -4.511232835 | 3.468549423 |
| H | -3.764541359 | 2.933715902  | 4.199943545 |
| H | 3.764580596  | -2.933679954 | 4.199908561 |
| C | -2.962559741 | 3.581635653  | 3.824524777 |
| C | 2.962587035  | -3.581594904 | 3.824507218 |
| H | -0.879998808 | 1.929040155  | 4.28097385  |
| H | 0.880048     | -1.928974504 | 4.28097355  |
| H | -2.254595036 | 0.92730038   | 3.795014127 |
| H | 2.254648186  | -0.927253636 | 3.794986817 |
| H | -2.32768707  | 3.834931507  | 4.687340775 |
| H | 2.327724935  | -3.834877829 | 4.687334779 |

---

**Supplementary Table 8 | Cartesian coordinate of II. Units are presented in Å.**

SCF energy (in toluene) = -3963.00659617 hartree

ZPE = 1.297034 hartree

---

| Atom | Coordinates (Angstroms) |              |              |
|------|-------------------------|--------------|--------------|
|      | X                       | Y            | Z            |
| Mo   | -2.98085911             | 1.864639987  | 1.86942464   |
| Mo   | 2.220665373             | 1.739301191  | 1.510909153  |
| P    | 2.734184325             | -0.686299738 | 2.23904729   |
| P    | -3.197099134            | 3.467708845  | 3.860766448  |
| N    | -5.229112399            | 1.942802453  | 2.199778669  |
| N    | 4.408393943             | 1.559252753  | 1.008597744  |
| P    | 2.744380469             | 4.06589171   | 0.584163906  |
| P    | -3.869188334            | 0.294304381  | 0.027172426  |
| N    | -1.007800911            | 1.811440824  | 1.643876166  |
| N    | 0.150379146             | 1.781050891  | 1.576673071  |
| N    | -2.75736925             | -0.58357741  | 3.870999807  |
| N    | -2.842218067            | 0.296187449  | 3.15965413   |
| N    | -3.099896775            | 3.426402951  | 0.563973123  |
| N    | -3.161053727            | 4.29728711   | -0.160294839 |
| N    | 2.901014311             | 2.626319517  | 4.359790493  |
| N    | 2.544020331             | 2.277613717  | 3.233504784  |
| N    | 1.820231798             | 1.058343241  | -0.566577203 |
| N    | 1.556737193             | 0.710809814  | -1.59607928  |
| H    | 2.649923429             | -2.708290659 | 5.556130289  |
| H    | -1.999332633            | 3.519133372  | 7.566711604  |
| H    | -3.540491407            | 2.923961697  | 6.94918469   |
| H    | 4.000191393             | -1.77499332  | 4.910912508  |
| C    | 3.105719571             | -2.341843494 | 4.624799699  |
| C    | -2.733037333            | 3.640878941  | 6.756104192  |
| H    | -2.22433727             | 1.182262978  | 5.651792925  |
| H    | 2.557461068             | 0.292657682  | 5.135118625  |
| H    | -3.144108524            | 4.649537654  | 6.840697885  |
| H    | 3.421856595             | -3.216815027 | 4.052631947  |
| H    | -0.741017405            | 1.882464741  | 6.302847438  |
| H    | 1.248728228             | -0.731873863 | 5.744322272  |
| C    | 1.691567111             | -0.305466642 | 4.832831219  |
| C    | -1.455568743            | 1.940004292  | 5.467964545  |
| H    | 0.333720112             | -2.552773524 | 4.569172146  |
| H    | -0.10192541             | 4.140135152  | 6.017888186  |
| C    | 2.07327147              | -1.461468325 | 3.888688276  |

---



|   |              |              |             |
|---|--------------|--------------|-------------|
| C | -2.030202386 | 3.368141406  | 5.40868768  |
| H | -4.451514604 | 1.768438283  | 5.019500283 |
| H | 4.444626678  | 0.284742808  | 3.623235971 |
| H | 0.953157559  | 0.36088145   | 4.375951895 |
| H | -0.929974154 | 1.673017284  | 4.545463672 |
| H | 5.146356763  | -1.145830173 | 2.855407239 |
| H | -5.290917533 | 3.299568061  | 5.26415496  |
| C | 0.788296403  | -2.269236209 | 3.609515044 |
| C | -0.842991465 | 4.335739966  | 5.22755985  |
| H | 2.752604942  | -3.925605828 | 2.164482209 |
| H | -3.096546772 | 6.268604413  | 5.490407632 |
| H | 0.043542094  | -1.677287644 | 3.062305018 |
| H | -0.345950439 | 4.194624454  | 4.258457027 |
| C | 4.518925531  | -0.265029448 | 2.673087499 |
| C | -4.781544548 | 2.685973805  | 4.511042652 |
| H | 7.129046774  | -0.225295572 | 1.927932858 |
| H | -7.491549745 | 2.672447722  | 4.608333866 |
| H | 0.975007516  | -3.195420435 | 3.056308711 |
| H | -1.132718661 | 5.387499701  | 5.316566844 |
| H | 4.413040455  | -3.312092474 | 1.99884435  |
| H | -4.757068401 | 5.630830551  | 5.485473577 |
| H | -4.994702291 | -0.920052766 | 2.500455945 |
| H | 4.597461999  | 3.779453457  | 2.940458551 |
| C | 3.452306465  | -3.433344635 | 1.482895356 |
| C | -3.984806555 | 6.110150437  | 4.870425126 |
| H | -3.477218981 | -3.34821978  | 1.16300632  |
| H | 3.137789099  | 6.429035409  | 3.562750925 |
| C | 6.544153048  | 0.519277858  | 1.393980901 |
| C | -7.121897513 | 2.371647736  | 3.631068085 |
| H | 3.622125449  | -4.122014872 | 0.642432801 |
| H | -4.365354074 | 7.104391137  | 4.593773228 |
| C | 5.175502389  | 0.631471159  | 1.652555065 |
| C | -5.744015603 | 2.320833873  | 3.405849793 |
| H | -5.573119033 | -2.506073112 | 1.978188018 |
| H | 5.273924617  | 5.401426805  | 3.10453438  |
| H | -2.649358149 | -1.89517779  | 1.736822772 |
| H | 2.296900087  | 4.876665899  | 3.445967282 |
| C | -5.383362626 | -1.475959899 | 1.643837099 |
| C | 4.840973263  | 4.68969139   | 2.386991896 |
| C | -3.156435853 | -2.336339888 | 0.874635931 |
| C | 2.621950437  | 5.747463098  | 2.870865723 |
| H | -9.079560869 | 2.079396644  | 2.761338178 |
| H | 8.204030094  | 1.276087892  | 0.236940081 |
| C | 2.911253854  | -2.10119192  | 0.924922545 |
| C | -3.684295208 | 5.320548214  | 3.580299506 |
| H | -6.350671298 | -1.044143315 | 1.362362236 |
| H | 5.620776709  | 4.464872299  | 1.649615794 |

|   |              |              |              |
|---|--------------|--------------|--------------|
| C | -8.0038341   | 2.041232199  | 2.60445895   |
| C | 7.141349314  | 1.357577805  | 0.455276912  |
| H | -2.427972391 | -2.444197571 | 0.065240435  |
| H | 1.735420079  | 6.269170122  | 2.498754791  |
| H | 0.804058768  | -2.757993905 | 0.9804819    |
| H | -1.628110648 | 6.106395639  | 3.388847566  |
| H | 4.935419874  | -1.616932406 | 0.201880893  |
| H | -5.841299865 | 4.98880133   | 3.264320932  |
| C | -4.400110962 | -1.522340669 | 0.451230794  |
| C | 3.60123452   | 5.352178337  | 1.742614803  |
| C | 1.533107597  | -2.353061138 | 0.272820587  |
| C | -2.551373875 | 6.030511834  | 2.806187686  |
| C | 3.904270012  | -1.644222784 | -0.168053393 |
| C | -4.96577378  | 5.35618659   | 2.716662011  |
| H | 3.875130665  | -2.369910836 | -0.993310408 |
| H | -5.170520971 | 6.400241176  | 2.43979189   |
| H | -5.485673742 | -3.227095556 | -0.313696349 |
| H | 4.662135485  | 7.232729388  | 1.73310105   |
| C | 6.356050715  | 2.309369259  | -0.19044718  |
| C | -7.47643983  | 1.66164118   | 1.372312631  |
| H | 1.106392333  | -1.443588507 | -0.15994332  |
| H | -2.320629512 | 5.527337229  | 1.863558224  |
| C | 4.994543911  | 2.404262451  | 0.112024015  |
| C | -6.091148161 | 1.614175043  | 1.194666346  |
| C | -5.117897901 | -2.263180003 | -0.694856138 |
| C | 4.080998762  | 6.627976582  | 1.021995701  |
| H | -5.989414779 | -1.711963744 | -1.069991298 |
| H | 4.739966411  | 6.412913826  | 0.170876204  |
| H | 1.647785829  | -3.086517738 | -0.538408777 |
| H | -2.871122636 | 7.055122854  | 2.566054596  |
| H | -8.129551132 | 1.398254219  | 0.543933744  |
| H | 6.790771067  | 2.990663244  | -0.917412355 |
| H | 3.67044992   | -0.662599153 | -0.587466879 |
| H | -4.872258431 | 4.782925416  | 1.791210047  |
| H | -2.494105966 | -1.755994103 | -1.964354549 |
| H | 1.086320584  | 6.769076075  | 0.549461836  |
| C | -5.512218174 | 1.200475542  | -0.136906061 |
| C | 4.145801739  | 3.47059274   | -0.537476974 |
| H | -4.457267254 | -2.483311193 | -1.539311282 |
| H | 3.254030286  | 7.253426037  | 0.671322641  |
| H | -6.259758464 | 0.639245463  | -0.710854363 |
| H | 4.786498843  | 4.285085963  | -0.896858537 |
| H | -1.335441092 | -0.653328522 | -1.187482514 |
| H | 0.098916526  | 5.331028539  | 0.906345808  |
| C | -2.102969597 | -0.733569397 | -1.968604544 |
| C | 0.607169742  | 5.88846879   | 0.108985396  |
| H | -5.27498317  | 2.102703874  | -0.719705214 |

|   |              |              |              |
|---|--------------|--------------|--------------|
| H | 3.643950382  | 3.058537561  | -1.425246965 |
| C | -3.206284911 | 0.330557169  | -1.796227296 |
| C | 1.598700636  | 4.999204853  | -0.669230444 |
| H | -1.772032619 | 1.923807687  | -1.305770644 |
| H | 0.194269341  | 3.307451637  | -0.74284433  |
| H | -1.606368778 | -0.580185472 | -2.937394672 |
| H | -0.166701049 | 6.251117774  | -0.582106506 |
| C | -2.560384919 | 1.709405949  | -2.034463556 |
| C | 0.773485917  | 3.938133326  | -1.424656943 |
| H | -4.797985635 | -0.828892398 | -2.820467607 |
| H | 2.919616317  | 6.66787274   | -1.301982623 |
| H | -5.058197785 | 0.92589478   | -2.830383086 |
| H | 3.021785197  | 5.232080489  | -2.338895093 |
| C | -4.295182989 | 0.139122772  | -2.874106868 |
| C | 2.345512128  | 5.841023281  | -1.726016563 |
| H | -2.111811662 | 1.718461773  | -3.038743404 |
| H | 0.064674479  | 4.451176417  | -2.090020123 |
| H | -3.288335104 | 2.526645554  | -1.999329646 |
| H | 1.398303341  | 3.297148051  | -2.057552803 |
| H | -3.823317222 | 0.207974293  | -3.86528051  |
| H | 1.604104465  | 6.27790937   | -2.410644432 |
| H | 2.094948989  | 2.809592234  | 4.989814654  |

---

**Supplementary Table 9 | Cartesian coordinate of III. Units are presented in Å.**

SCF energy (in toluene) = -3853.50852839 hartree

ZPE = 1.286557 hartree

---

| Atom | Coordinates (Angstroms) |              |              |
|------|-------------------------|--------------|--------------|
|      | X                       | Y            | Z            |
| Mo   | -2.635377403            | 0.091684026  | -0.007458813 |
| Mo   | 2.635380273             | -0.091673298 | -0.007498766 |
| P    | 3.257938643             | 2.072237977  | -1.172523258 |
| P    | -3.257930861            | -2.072244635 | -1.172454287 |
| N    | -4.874109596            | 0.176550058  | 0.016403149  |
| N    | 4.874111726             | -0.176565357 | 0.01632513   |
| P    | 3.064974045             | -2.293917874 | 1.177333274  |
| P    | -3.064977138            | 2.293933267  | 1.17736402   |
| N    | -0.575598978            | 0.020135817  | -0.020344925 |
| N    | 0.575601843             | -0.020103726 | -0.020353405 |
| N    | -2.580942878            | 1.547911994  | -2.823171702 |
| N    | -2.60031816             | 1.014326216  | -1.818570178 |
| N    | -2.628893009            | -0.833551933 | 1.800962059  |
| N    | -2.625965989            | -1.368782601 | 2.805023974  |
| N    | 2.580906829             | -1.5479145   | -2.823202544 |
| N    | 2.60029284              | -1.014323536 | -1.818603747 |
| N    | 2.628930786             | 0.833577163  | 1.800914596  |
| N    | 2.626024628             | 1.368817571  | 2.804971252  |
| H    | 2.696071696             | 3.652111935  | -4.699098118 |
| H    | -2.696117575            | -3.652151969 | -4.699024141 |
| H    | -4.060564816            | -2.661077483 | -4.178901924 |
| H    | 4.060511247             | 2.661015124  | -4.178997833 |
| C    | 3.296519175             | 3.363526531  | -3.822886069 |
| C    | -3.296549734            | -3.363569215 | -3.822800781 |
| H    | -2.399405059            | -0.7702234   | -3.810361023 |
| H    | 2.39932748              | 0.770191107  | -3.810385604 |
| H    | -3.801918011            | -4.264748976 | -3.465500605 |
| H    | 3.801914063             | 4.264700003  | -3.465607313 |
| H    | -1.110738815            | -1.870053953 | -4.317945243 |
| H    | 1.11067494              | 1.870040202  | -4.31796489  |
| C    | 1.680139036             | 1.511598414  | -3.447297632 |
| C    | -1.680194137            | -1.511608973 | -3.447273564 |
| H    | 0.624030796             | 3.913124429  | -3.262969456 |
| H    | -0.624046911            | -3.913122746 | -3.262942224 |
| C    | 2.364157011             | 2.718911257  | -2.774734561 |

---

|   |              |              |              |
|---|--------------|--------------|--------------|
| C | -2.364174858 | -2.718924521 | -2.774678069 |
| H | -4.560176303 | -0.781957407 | -2.729426349 |
| H | 4.56014255   | 0.781924078  | -2.729508188 |
| H | 0.982272273  | 1.007568782  | -2.771137475 |
| H | -0.982325595 | -1.007553569 | -2.771134563 |
| H | 5.549454273  | 2.174134614  | -2.27791347  |
| H | -5.549464254 | -2.174176795 | -2.277804824 |
| C | 1.251025802  | 3.711230504  | -2.382215536 |
| C | -1.251016547 | -3.711218793 | -2.382172596 |
| H | 3.649490071  | 5.267175443  | -1.615209943 |
| H | -3.649479194 | -5.267191698 | -1.615101868 |
| H | 0.597053501  | 3.297948771  | -1.603769292 |
| H | -0.597025166 | -3.297910781 | -1.603756433 |
| C | 4.878942762  | 1.401904473  | -1.878771139 |
| C | -4.878955232 | -1.401935504 | -1.878679698 |
| H | 7.558132831  | 1.083664352  | -1.623890887 |
| H | -7.55814502  | -1.08373068  | -1.623750514 |
| H | 1.641724341  | 4.673412751  | -2.034207479 |
| H | -1.641690018 | -4.673399068 | -2.034131142 |
| H | 5.23316802   | 4.459834436  | -1.64053702  |
| H | -5.233157226 | -4.459849818 | -1.640408925 |
| H | -4.510453255 | 2.624133323  | -1.374739588 |
| H | 4.510481856  | -2.624167541 | -1.374750558 |
| C | 4.406524428  | 4.779202287  | -0.992587811 |
| C | -4.406502457 | -4.779212021 | -0.992471579 |
| H | -2.644473704 | 5.181525873  | -1.315718885 |
| H | 2.644413206  | -5.181506163 | -1.315747379 |
| C | 7.012103477  | 0.498016328  | -0.887594267 |
| C | -7.012109484 | -0.498069449 | -0.887469007 |
| H | 4.808315712  | 5.546514323  | -0.312993051 |
| H | -4.808282015 | -5.546516938 | -0.312861838 |
| C | 5.616357743  | 0.542006718  | -0.883073009 |
| C | -5.616363135 | -0.542040514 | -0.882974261 |
| H | -4.886748773 | 4.351052054  | -1.469889048 |
| H | 4.886711604  | -4.351100028 | -1.469898663 |
| H | -2.028622076 | 3.524102423  | -1.382682391 |
| H | 2.028624899  | -3.524060827 | -1.382738606 |
| C | -4.716922695 | 3.513944395  | -0.775981435 |
| C | 4.716909318  | -3.513987309 | -0.775991204 |
| C | -2.347894097 | 4.317248985  | -0.701537421 |
| C | 2.347854405  | -4.31721247  | -0.701579416 |
| H | -8.775888422 | 0.326640621  | 0.058867799  |
| H | 8.775889217  | -0.326708851 | 0.058716568  |
| C | 3.836256406  | 3.620069643  | -0.150935903 |
| C | -3.836219002 | -3.620071328 | -0.150842088 |
| H | -5.652226727 | 3.350819267  | -0.228012409 |
| H | 5.652212793  | -3.350899953 | -0.228010288 |

|   |              |              |              |
|---|--------------|--------------|--------------|
| C | -7.68877878  | 0.284457067  | 0.047334331  |
| C | 7.688779955  | -0.284510562 | 0.047203593  |
| H | -1.484809403 | 4.622456071  | -0.102310626 |
| H | 1.484747214  | -4.622382016 | -0.102365994 |
| H | 1.827338363  | 4.51342771   | 0.078845324  |
| H | -1.827289109 | -4.513414464 | 0.07890149   |
| H | 5.882593937  | 2.921943896  | 0.287569759  |
| H | -5.882551063 | -2.921952434 | 0.28770001   |
| C | -3.549053164 | 3.882315662  | 0.166706126  |
| C | 3.549014495  | -3.882316568 | 0.166681438  |
| C | 2.654673983  | 4.145881878  | 0.693297834  |
| C | -2.654615044 | -4.145872148 | 0.6933691    |
| C | 4.954992006  | 3.170903261  | 0.816182666  |
| C | -4.954936111 | -3.170900142 | 0.816295948  |
| H | 5.181821576  | 4.002417568  | 1.500351588  |
| H | -5.181746191 | -4.002407222 | 1.500480111  |
| H | -4.376991634 | 5.873127686  | 0.339871226  |
| H | 4.376881901  | -5.873156761 | 0.339860036  |
| C | 6.933853621  | -1.011179349 | 0.967138457  |
| C | -6.933844724 | 1.011145081  | 0.967247802  |
| H | 2.264192346  | 3.381338518  | 1.369957816  |
| H | -2.264125452 | -3.381322662 | 1.370017205  |
| C | 5.539351432  | -0.94728827  | 0.932590247  |
| C | -5.539342254 | 0.947272544  | 0.932673741  |
| C | -4.015823922 | 5.082051319  | 1.014854934  |
| C | 4.015733767  | -5.082066774 | 1.014838224  |
| H | -4.847821782 | 4.825111337  | 1.683487594  |
| H | 4.84773233   | -4.825154414 | 1.683480674  |
| H | 3.003867963  | 4.987412041  | 1.311296818  |
| H | -3.0037903   | -4.987402011 | 1.311379037  |
| H | -7.416924854 | 1.635972573  | 1.715285786  |
| H | 7.416939428  | -1.636006822 | 1.715172769  |
| H | 4.665735186  | 2.311453793  | 1.425216117  |
| H | -4.665671558 | -2.311441118 | 1.425312091  |
| H | -1.246113548 | 4.771354575  | 2.012656388  |
| H | 1.24609735   | -4.771315082 | 2.012685706  |
| C | -4.716907816 | 1.743591673  | 1.915265251  |
| C | 4.716924211  | -1.743588558 | 1.915202825  |
| H | -3.211383954 | 5.516749447  | 1.616972266  |
| H | 3.211271746  | -5.516736159 | 1.616947055  |
| H | -5.317474315 | 2.563146789  | 2.33087665   |
| H | 5.317487648  | -2.56314733  | 2.330811386  |
| H | -0.313270445 | 3.323994335  | 1.5615421    |
| H | 0.313266444  | -3.32394941  | 1.561563398  |
| C | -0.921518906 | 3.781618296  | 2.351666744  |
| C | 0.921519909  | -3.781569967 | 2.351686333  |
| H | -4.429302673 | 1.095907809  | 2.75652926   |

|   |              |              |             |
|---|--------------|--------------|-------------|
| H | 4.429340797  | -1.095893404 | 2.756465498 |
| C | -2.096540732 | 2.871965886  | 2.762553858 |
| C | 2.096558505  | -2.87192564  | 2.762544115 |
| H | -0.844450964 | 1.066357215  | 2.729603618 |
| H | 0.844487748  | -1.066302923 | 2.729597187 |
| H | -0.266494549 | 3.933147486  | 3.221958516 |
| H | 0.26650521   | -3.933079103 | 3.221989054 |
| C | -1.490711912 | 1.61647054   | 3.420722228 |
| C | 1.49075242   | -1.616418441 | 3.420710838 |
| H | -3.414049403 | 4.51126643   | 3.46856709  |
| H | 3.414062116  | -4.511232835 | 3.468549423 |
| H | -3.764541359 | 2.933715902  | 4.199943545 |
| H | 3.764580596  | -2.933679954 | 4.199908561 |
| C | -2.962559741 | 3.581635653  | 3.824524777 |
| C | 2.962587035  | -3.581594904 | 3.824507218 |
| H | -0.879998808 | 1.929040155  | 4.28097385  |
| H | 0.880048     | -1.928974504 | 4.28097355  |
| H | -2.254595036 | 0.92730038   | 3.795014127 |
| H | 2.254648186  | -0.927253636 | 3.794986817 |
| H | -2.32768707  | 3.834931507  | 4.687340775 |
| H | 2.327724935  | -3.834877829 | 4.687334779 |

---

**Supplementary Table 10 | Cartesian coordinate of IV. Units are presented in Å.**

SCF energy (in toluene) = -4814.96151136 hartree

ZPE = 1.315695 hartree

---

| Atom | Coordinates (Angstroms) |              |              |
|------|-------------------------|--------------|--------------|
|      | X                       | Y            | Z            |
| Mo   | -2.892002857            | -0.043947612 | 0.008716323  |
| Mo   | 2.298961332             | 0.581972042  | 0.422737997  |
| P    | 2.865370221             | -0.755980831 | 2.56707277   |
| P    | -3.572161518            | 2.388794852  | 0.468304394  |
| N    | -5.15232017             | -0.141546221 | -0.02188653  |
| N    | 4.507776474             | 0.864377112  | 0.55198341   |
| P    | 2.743287263             | 2.060776804  | -1.607687564 |
| P    | -3.323209889            | -2.515115106 | -0.491316566 |
| N    | -0.874523202            | 0.047446495  | 0.076986685  |
| N    | 0.275667019             | 0.121685667  | 0.141845048  |
| N    | -2.934428929            | -0.595064937 | 3.131652597  |
| N    | -2.915948026            | -0.394446364 | 2.013558067  |
| N    | -2.855246014            | 0.324839904  | -1.994233371 |
| N    | -2.844770586            | 0.547220484  | -3.107823427 |
| N    | 1.724720741             | 3.02809401   | 2.141604095  |
| N    | 1.99623111              | 2.02177399   | 1.450189986  |
| H    | 1.804803082             | -0.494624946 | 6.298779232  |
| H    | -3.115085588            | 4.943395904  | 3.375803124  |
| H    | -4.453398706            | 3.815486883  | 3.146310785  |
| H    | 3.174484108             | 0.296944851  | 5.514588427  |
| C    | 2.524495692             | -0.586738482 | 5.471246438  |
| C    | -3.692950283            | 4.400038855  | 2.613071771  |
| H    | -2.757083296            | 1.954586574  | 3.389835209  |
| H    | 1.482625305             | 1.540224763  | 4.039308305  |
| H    | -4.203335526            | 5.146932327  | 1.99938395   |
| H    | 3.136026524             | -1.47053859  | 5.667687348  |
| H    | -1.454046313            | 3.146262848  | 3.528782509  |
| H    | 0.206448289             | 0.658412882  | 4.898887559  |
| C    | 0.889756747             | 0.621112907  | 4.0371251    |
| C    | -2.039731719            | 2.550407246  | 2.814655617  |
| H    | 0.015777095             | -1.691364745 | 4.931451388  |
| H    | -1.000682204            | 4.80140615   | 1.948357483  |
| C    | 1.744758499             | -0.653908595 | 4.141503495  |
| C    | -2.725596749            | 3.499946972  | 1.815838669  |
| H    | -4.865196874            | 1.573024161  | 2.32252891   |

---



|   |              |              |              |
|---|--------------|--------------|--------------|
| H | 3.830786203  | 1.31086841   | 3.351720114  |
| H | 0.286679806  | 0.626111344  | 3.125303392  |
| H | -1.350482929 | 1.870205017  | 2.308495488  |
| H | 4.960675744  | 0.018759124  | 3.774028735  |
| H | -5.8653867   | 2.764011661  | 1.487388416  |
| C | 0.767245044  | -1.849237614 | 4.144190295  |
| C | -1.622943481 | 4.354282072  | 1.16120257   |
| H | 3.175738777  | -3.322407034 | 4.538389945  |
| H | -4.043867337 | 5.551188133  | -0.070426425 |
| H | 0.227469979  | -1.92757397  | 3.191728057  |
| H | -0.955274653 | 3.745276343  | 0.540685792  |
| C | 4.309631927  | 0.394855303  | 2.975089139  |
| C | -5.183421503 | 1.919055539  | 1.328074325  |
| H | 6.996698251  | 0.806697872  | 2.836974961  |
| H | -7.858577946 | 1.511714942  | 1.165851612  |
| H | 1.253555051  | -2.808968383 | 4.343758549  |
| H | -2.02642596  | 5.170909465  | 0.552244428  |
| H | 4.730669991  | -2.460559708 | 4.486845403  |
| H | -5.609327352 | 4.742993051  | 0.175586785  |
| H | -4.80710113  | -2.08806533  | 2.038742476  |
| H | 3.877104202  | 3.588245963  | 0.670192432  |
| C | 4.048167576  | -3.103526773 | 3.915405809  |
| C | -4.777359334 | 4.879512911  | -0.527537846 |
| H | -2.911052652 | -4.507366697 | 2.754336567  |
| H | 1.935688798  | 5.706292669  | -0.702718721 |
| C | 6.518969719  | 0.916169361  | 1.866476583  |
| C | -7.30137785  | 0.743152235  | 0.635102333  |
| H | 4.572302734  | -4.056252269 | 3.746265785  |
| H | -5.183238734 | 5.397169602  | -1.41006658  |
| C | 5.138795706  | 0.733340535  | 1.755411554  |
| C | -5.9055097   | 0.799527629  | 0.622616365  |
| H | -5.172507994 | -3.716495577 | 2.623494617  |
| H | 4.170481766  | 5.210426597  | 0.015709767  |
| H | -2.294675168 | -2.909656752 | 2.306817651  |
| H | 1.411415319  | 4.215633701  | 0.102968315  |
| C | -4.996326771 | -3.115085678 | 1.719219601  |
| C | 4.114292197  | 4.142050893  | -0.24154955  |
| C | -2.613451122 | -3.874776089 | 1.904218051  |
| C | 1.743871313  | 4.632159451  | -0.853256355 |
| H | -9.048106351 | -0.342802113 | -0.036785068 |
| H | 8.34790918   | 1.339367559  | 0.797016169  |
| C | 3.691867708  | -2.503859585 | 2.540129948  |
| C | -4.162210517 | 3.540285351  | -0.979869094 |
| H | -5.922999813 | -3.128427026 | 1.133538262  |
| H | 5.111954741  | 3.837116243  | -0.577176638 |
| C | -7.961551963 | -0.286553933 | -0.032690393 |
| C | 7.268878328  | 1.213969561  | 0.729576398  |

|   |              |              |              |
|---|--------------|--------------|--------------|
| H | -1.748507449 | -4.347937384 | 1.429959378  |
| H | 0.926500175  | 4.547132224  | -1.574591183 |
| H | 1.811412097  | -3.639357899 | 2.351035079  |
| H | -2.186598995 | 4.415481425  | -1.4356143   |
| H | 5.779907178  | -1.855721666 | 2.325746392  |
| H | -6.17612879  | 2.674263599  | -1.214851953 |
| C | -3.812560888 | -3.731274934 | 0.940526324  |
| C | 3.044472163  | 3.95772701   | -1.341724974 |
| C | 2.735161024  | -3.455443549 | 1.790701406  |
| C | -2.971036693 | 3.826890149  | -1.920439638 |
| C | 5.013875199  | -2.394963534 | 1.754408992  |
| C | -5.248910311 | 2.794584083  | -1.78688463  |
| H | 5.396208182  | -3.407493789 | 1.565822817  |
| H | -5.491080574 | 3.389531722  | -2.68012609  |
| H | -4.624190484 | -5.69113494  | 1.357622498  |
| H | 3.818240446  | 5.7265619    | -2.316492193 |
| C | 6.615822051  | 1.356167239  | -0.490940867 |
| C | -7.19372578  | -1.242423169 | -0.694909579 |
| H | 2.470047355  | -3.056497936 | 0.808993835  |
| H | -2.520991094 | 2.907133696  | -2.303020494 |
| C | 5.226512585  | 1.198286207  | -0.558462772 |
| C | -5.799611067 | -1.155091091 | -0.671790633 |
| C | -4.259979369 | -5.133527483 | 0.481442922  |
| C | 3.568775928  | 4.690973432  | -2.593829055 |
| H | -5.085171697 | -5.095537158 | -0.241832966 |
| H | 4.483923457  | 4.234641482  | -2.992712917 |
| H | 3.231454963  | -4.424901139 | 1.638614235  |
| H | -3.330113001 | 4.404819369  | -2.785495469 |
| H | -7.664868315 | -2.06412093  | -1.229376695 |
| H | 7.16739421   | 1.600185415  | -1.395342349 |
| H | 4.891270536  | -1.927803833 | 0.7777166    |
| H | -4.923416993 | 1.808882346  | -2.126597708 |
| H | -1.502987287 | -5.104730729 | -0.550679555 |
| H | 1.01444108   | 3.834034096  | -3.622565842 |
| C | -4.96203239  | -2.1939429   | -1.371350209 |
| C | 4.498845443  | 1.418414782  | -1.863245614 |
| H | -3.444857625 | -5.718716745 | 0.044538334  |
| H | 2.832680344  | 4.74224554   | -3.401378715 |
| H | -5.55645342  | -3.099573619 | -1.545879415 |
| H | 5.10442887   | 2.056886604  | -2.519367949 |
| H | -0.559766185 | -3.595312431 | -0.574359217 |
| H | 0.012969022  | 2.721705819  | -2.659758062 |
| C | -1.179053883 | -4.268422375 | -1.179617061 |
| C | 0.713063523  | 2.788311927  | -3.502188507 |
| H | -4.664877116 | -1.811674068 | -2.358959145 |
| H | 4.378700991  | 0.45474841   | -2.379698483 |
| C | -2.357929841 | -3.524786481 | -1.837659263 |

|   |              |              |              |
|---|--------------|--------------|--------------|
| C | 1.899716662  | 1.816268782  | -3.337461119 |
| H | -1.133544132 | -1.7727566   | -2.350327278 |
| H | 0.632568607  | 0.211880047  | -2.531969064 |
| H | -0.530238746 | -4.68099325  | -1.962705926 |
| H | 0.155689595  | 2.505275179  | -4.406854382 |
| C | -1.772206238 | -2.513026258 | -2.8412987   |
| C | 1.317688346  | 0.389254107  | -3.367191744 |
| H | -3.667994741 | -5.306725739 | -2.0221089   |
| H | 3.344072946  | 2.945146826  | -4.586692975 |
| H | -4.035218561 | -4.014221137 | -3.181093834 |
| H | 3.663930032  | 1.19631625   | -4.485510596 |
| C | -3.226844584 | -4.518824075 | -2.637236229 |
| C | 2.876123618  | 1.957515514  | -4.523467965 |
| H | -1.156325429 | -3.055966732 | -3.57083821  |
| H | 0.750459976  | 0.264854724  | -4.30226203  |
| H | -2.549717019 | -1.981737258 | -3.40053394  |
| H | 2.100537067  | -0.369204446 | -3.351426202 |
| H | -2.592175752 | -5.008176758 | -3.391009415 |
| H | 2.319292625  | 1.797603173  | -5.459112633 |
| H | 2.579411752  | 3.560674164  | 2.384499974  |
| S | 3.690710052  | -2.177685502 | -1.883237592 |
| O | 4.049212292  | -1.458647926 | -3.128907923 |
| O | 4.754152107  | -2.982945827 | -1.26294874  |
| O | 2.88557772   | -1.341778779 | -0.912410411 |
| C | 2.43674017   | -3.439418835 | -2.440391205 |
| F | 2.033727222  | -4.199042224 | -1.404122444 |
| F | 1.35229646   | -2.845543614 | -2.971149231 |
| F | 2.977131221  | -4.241022756 | -3.366924845 |

---

**Supplementary Table 11 | Cartesian coordinate of V. Units are presented in Å.**

SCF energy (in toluene) = -4815.53322129 hartree

ZPE = 1.328643 hartree

---

| Atom | Coordinates (Angstroms) |              |              |
|------|-------------------------|--------------|--------------|
|      | X                       | Y            | Z            |
| Mo   | -2.901799164            | -0.029739246 | 0.132061097  |
| Mo   | 2.305167097             | 0.493603219  | 0.501869568  |
| P    | 2.871768509             | -1.34334194  | 2.256842318  |
| P    | -3.762531934            | 2.331176864  | 0.618290635  |
| N    | -5.144147229            | -0.253853427 | -0.095248925 |
| N    | 4.534580918             | 0.70342239   | 0.693671936  |
| P    | 2.816170713             | 2.419107316  | -1.157128854 |
| P    | -3.167444741            | -2.512067701 | -0.444817183 |
| N    | -0.870499179            | 0.143639912  | 0.257653796  |
| N    | 0.285455193             | 0.241315821  | 0.293560797  |
| N    | -3.045300509            | -0.692653297 | 3.22743921   |
| N    | -2.999174818            | -0.44885138  | 2.118035266  |
| N    | -2.75137532             | 0.386225296  | -1.855772708 |
| N    | -2.661787737            | 0.625291237  | -2.962033331 |
| N    | 1.020138277             | 2.353469977  | 2.374813166  |
| N    | 2.090552171             | 1.720475592  | 1.883883048  |
| H    | 1.881365942             | -1.981608017 | 5.963012485  |
| H    | -3.822983747            | 4.839262721  | 3.615656367  |
| H    | -5.039467891            | 3.62350399   | 3.225672084  |
| H    | 3.302055993             | -1.118607965 | 5.366317126  |
| C    | 2.584195574             | -1.911359228 | 5.11900173   |
| C    | -4.27061166             | 4.270439677  | 2.786415115  |
| H    | -3.286940746            | 1.858226346  | 3.607414723  |
| H    | 1.706485171             | 0.57859524   | 4.283954684  |
| H    | -4.763989735            | 4.989367293  | 2.12807793   |
| H    | 3.125603723             | -2.85823892  | 5.06668905   |
| H    | -2.121935911            | 3.137078769  | 3.963255135  |
| H    | 0.397238752             | -0.390267101 | 4.9877857    |
| C    | 1.031878069             | -0.263419632 | 4.097350262  |
| C    | -2.544787245            | 2.523329339  | 3.153467709  |
| H    | 0.010467707             | -2.688811107 | 4.398426618  |
| H    | -1.578909492            | 4.890139132  | 2.472071253  |
| C    | 1.786692248             | -1.579660318 | 3.839810072  |
| C    | -3.159696789            | 3.454462562  | 2.089991657  |
| H    | -5.19297553             | 1.387500827  | 2.313611586  |

---

|   |              |              |              |
|---|--------------|--------------|--------------|
| H | 3.873382367  | 0.44903274   | 3.503221502  |
| H | 0.39009061   | 0.013321613  | 3.25779056   |
| H | -1.745402625 | 1.895808869  | 2.747864522  |
| H | 4.983742549  | -0.933124628 | 3.593748532  |
| H | -6.161935294 | 2.557013512  | 1.412263599  |
| C | 0.728420471  | -2.668145935 | 3.565415877  |
| C | -2.052341012 | 4.410731988  | 1.60194809   |
| H | 3.098355481  | -4.341228043 | 3.497578535  |
| H | -4.349722852 | 5.494534897  | 0.109869756  |
| H | 0.162704721  | -2.451307522 | 2.650562282  |
| H | -1.26788198  | 3.881197608  | 1.045547819  |
| C | 4.338259194  | -0.356713918 | 2.919119374  |
| C | -5.425746575 | 1.750703272  | 1.301568898  |
| H | 7.023231049  | 0.029299561  | 2.881796043  |
| H | -8.040885291 | 1.228799915  | 0.849622807  |
| H | 1.156706559  | -3.671833211 | 3.475335165  |
| H | -2.434139027 | 5.212838649  | 0.961263425  |
| H | 4.679062586  | -3.540126133 | 3.661922421  |
| H | -5.884212036 | 4.599239485  | 0.180431253  |
| H | -4.855733229 | -2.183210918 | 1.991089816  |
| H | 3.74412522   | 3.372608567  | 1.499842163  |
| C | 3.978545923  | -3.99264321  | 2.948011077  |
| C | -4.995563698 | 4.796619189  | -0.432579149 |
| H | -3.006277367 | -4.594104254 | 2.775265781  |
| H | 2.10799783   | 5.811238716  | 0.523249181  |
| C | 6.551136879  | 0.388309755  | 1.970407832  |
| C | -7.395569259 | 0.505807233  | 0.355800303  |
| H | 4.473714743  | -4.884204623 | 2.534882471  |
| H | -5.33890625  | 5.315817393  | -1.340087325 |
| C | 5.168027344  | 0.265191573  | 1.820225713  |
| C | -6.010913585 | 0.625017672  | 0.493041258  |
| H | -5.255814653 | -3.83921292  | 2.467361255  |
| H | 4.230357912  | 5.064293168  | 1.210749505  |
| H | -2.37750821  | -2.975226501 | 2.439596245  |
| H | 1.372237078  | 4.221208957  | 0.798184207  |
| C | -5.006768746 | -3.196005665 | 1.610020041  |
| C | 4.124184197  | 4.071647329  | 0.746366934  |
| C | -2.641862447 | -3.929604219 | 1.977054454  |
| C | 1.862844811  | 4.848669435  | 0.048404293  |
| H | -9.00871081  | -0.630635853 | -0.534349658 |
| H | 8.390127621  | 1.042804086  | 1.041749017  |
| C | 3.642403685  | -3.049004991 | 1.776698388  |
| C | -4.270847158 | 3.501537991  | -0.848882839 |
| H | -5.878781892 | -3.188243926 | 0.945901966  |
| H | 5.127194877  | 3.747931227  | 0.446675907  |
| C | -7.93280372  | -0.525516264 | -0.412144452 |
| C | 7.30960949   | 0.953441269  | 0.94686088   |

|   |              |              |              |
|---|--------------|--------------|--------------|
| H | -1.730200117 | -4.37668142  | 1.570193643  |
| H | 1.144495218  | 5.054622087  | -0.749031604 |
| H | 1.716759563  | -4.017176129 | 1.314949157  |
| H | -2.28950756  | 4.452556483  | -1.067405519 |
| H | 5.743454348  | -2.410804618 | 1.71720617   |
| H | -6.214735782 | 2.571317391  | -1.31132083  |
| C | -3.751593516 | -3.770415808 | 0.914173792  |
| C | 3.16676878   | 4.196210817  | -0.461032852 |
| C | 2.657532682  | -3.750699036 | 0.817505482  |
| C | -3.00531458  | 3.868325465  | -1.654442539 |
| C | 4.966652163  | -2.778262744 | 1.034879304  |
| C | -5.236844256 | 2.732766581  | -1.779532584 |
| H | 5.326727484  | -3.721018054 | 0.600582235  |
| H | -5.403228029 | 3.336874518  | -2.683855162 |
| H | -4.558482279 | -5.755941224 | 1.202903822  |
| H | 4.08492207   | 6.083233037  | -0.991503395 |
| C | 6.65833202   | 1.404348688  | -0.19782752  |
| C | -7.051598669 | -1.418529451 | -1.018800844 |
| H | 2.429347629  | -3.124638582 | -0.04899675  |
| H | -2.491688853 | 2.981897914  | -2.035888355 |
| C | 5.268030589  | 1.284110031  | -0.299421582 |
| C | -5.673843633 | -1.270004382 | -0.843036867 |
| C | -4.134019173 | -5.16455773  | 0.377411462  |
| C | 3.833585135  | 5.134140969  | -1.489123636 |
| H | -4.897656989 | -5.11652281  | -0.409853556 |
| H | 4.770093548  | 4.72181476   | -1.88526939  |
| H | 3.11266233   | -4.681549462 | 0.448484674  |
| H | -3.295713905 | 4.481234542  | -2.521110754 |
| H | -7.420938243 | -2.240608052 | -1.627651859 |
| H | 7.213789513  | 1.85629002   | -1.015840119 |
| H | 4.854413981  | -2.083637908 | 0.202686278  |
| H | -4.845589115 | 1.764771303  | -2.099250125 |
| H | -1.271317687 | -5.056013248 | -0.385352447 |
| H | 1.305747368  | 4.696083421  | -2.839774383 |
| C | -4.722135795 | -2.247358645 | -1.479157495 |
| C | 4.556217625  | 1.802276065  | -1.524642669 |
| H | -3.274648048 | -5.721630882 | -0.008727519 |
| H | 3.182912375  | 5.374187328  | -2.335812094 |
| H | -5.249630056 | -3.175962421 | -1.730367467 |
| H | 5.181691772  | 2.551403797  | -2.025827621 |
| H | -0.372150107 | -3.522374717 | -0.273863787 |
| H | 0.175204125  | 3.522188047  | -2.119601653 |
| C | -0.911220402 | -4.192287395 | -0.955020431 |
| C | 0.911687543  | 3.677470039  | -2.918459524 |
| H | -4.347442744 | -1.828133082 | -2.424630823 |
| H | 4.42274026   | 0.976659245  | -2.238667472 |
| C | -2.042357235 | -3.459651821 | -1.703765059 |

|   |              |              |              |
|---|--------------|--------------|--------------|
| C | 2.005256348  | 2.590269044  | -2.911915774 |
| H | -0.803778835 | -1.673738722 | -2.061338719 |
| H | 0.562429687  | 0.997649077  | -2.453667818 |
| H | -0.181125572 | -4.561246892 | -1.686402546 |
| H | 0.369288083  | 3.613759434  | -3.872935466 |
| C | -1.39226458  | -2.406767795 | -2.62186459  |
| C | 1.306098328  | 1.251179073  | -3.21744352  |
| H | -3.283249483 | -5.26831242  | -2.066216335 |
| H | 3.609968159  | 3.787413294  | -3.861628848 |
| H | -3.543927173 | -3.961268976 | -3.238602761 |
| H | 3.726432973  | 2.032896711  | -4.152286874 |
| C | -2.792782032 | -4.45857252  | -2.61248475  |
| C | 3.032278477  | 2.871288486  | -4.028344784 |
| H | -0.713587788 | -2.915714297 | -3.316798832 |
| H | 0.784945423  | 1.338880897  | -4.182861967 |
| H | -2.12982781  | -1.866791613 | -3.225763288 |
| H | 2.017890735  | 0.431586173  | -3.298901188 |
| H | -2.064388547 | -4.919268313 | -3.296350425 |
| H | 2.495471185  | 2.989126683  | -4.981855164 |
| H | 1.205340682  | 3.212840142  | 2.8880902    |
| S | 3.693501068  | -1.649522777 | -2.475551835 |
| O | 4.11373025   | -0.642907539 | -3.480785727 |
| O | 4.71829664   | -2.612026722 | -2.038980131 |
| O | 2.850627349  | -1.069101369 | -1.363541247 |
| C | 2.469102981  | -2.702140695 | -3.407898005 |
| F | 1.909961461  | -3.617816469 | -2.590419167 |
| F | 1.484269211  | -1.954612162 | -3.93753438  |
| F | 3.087150051  | -3.350646629 | -4.403733005 |
| H | 0.170862553  | 2.368720271  | 1.806787125  |

---

**Supplementary Table 12 | Cartesian coordinate of VI. Units are presented in Å.**

SCF energy (in toluene) = -4815.96314996 hartree

ZPE = 1.342531 hartree

---

| Atom | Coordinates (Angstroms) |              |              |
|------|-------------------------|--------------|--------------|
|      | X                       | Y            | Z            |
| Mo   | -2.903339004            | -0.10771704  | 0.028472292  |
| Mo   | 2.24707775              | 0.551525093  | 0.30580415   |
| P    | 2.820946551             | -0.926364495 | 2.451287231  |
| P    | -3.931435105            | 2.229489112  | 0.485401451  |
| N    | -5.151093968            | -0.486738959 | -0.156823849 |
| N    | 4.492580606             | 0.720469741  | 0.373626793  |
| P    | 2.739585736             | 2.14645619   | -1.750841771 |
| P    | -3.029814405            | -2.639683167 | -0.486027002 |
| N    | -0.923219673            | 0.163845251  | 0.1285249    |
| N    | 0.237793023             | 0.306380102  | 0.177640502  |
| N    | -2.942706564            | -0.709634757 | 3.135237501  |
| N    | -2.940914164            | -0.497788872 | 2.019875988  |
| N    | -2.829508312            | 0.286120215  | -1.975026147 |
| N    | -2.786378761            | 0.508096364  | -3.084521039 |
| N    | 0.864244731             | 2.732051679  | 1.67876216   |
| N    | 2.172213107             | 2.006699995  | 1.460534638  |
| H    | 2.071642036             | -0.589753588 | 6.244128901  |
| H    | -4.082113865            | 4.750906934  | 3.458950284  |
| H    | -5.200987317            | 3.427806409  | 3.134012005  |
| H    | 3.456795236             | 0.073810974  | 5.372234058  |
| C    | 2.711636926             | -0.731477057 | 5.360971088  |
| C    | -4.505878729            | 4.128348853  | 2.656945949  |
| H    | -3.313146045            | 1.803192942  | 3.462730517  |
| H    | 1.866158729             | 1.515748738  | 3.930363884  |
| H    | -5.079487088            | 4.787242617  | 2.00140874   |
| H    | 3.233828279             | -1.681217085 | 5.488619805  |
| H    | -2.234695988            | 3.164977053  | 3.773032565  |
| H    | 0.637266963             | 0.858855993  | 5.037915198  |
| C    | 1.144081428             | 0.701773084  | 4.075107353  |
| C    | -2.640267507            | 2.518431415  | 2.979682907  |
| H    | 0.051067483             | -1.490206279 | 5.035976026  |
| H    | -1.866684673            | 4.936914666  | 2.261665303  |
| C    | 1.827871739             | -0.679257605 | 4.095411716  |
| C    | -3.356140044            | 3.394686185  | 1.932973358  |
| H    | -5.263144335            | 1.198852931  | 2.21350343   |

---



|   |              |              |              |
|---|--------------|--------------|--------------|
| H | 4.013485642  | 1.021360484  | 3.195256773  |
| H | 0.382537533  | 0.734099252  | 3.287090415  |
| H | -1.820081817 | 1.938170364  | 2.540703122  |
| H | 5.037406284  | -0.388533412 | 3.509458339  |
| H | -6.312903936 | 2.29235148   | 1.30982528   |
| C | 0.696845631  | -1.726762233 | 4.178441699  |
| C | -2.341170245 | 4.430568671  | 1.407629837  |
| H | 2.900137928  | -3.545381    | 4.381884008  |
| H | -4.716392857 | 5.341737767  | -0.040926424 |
| H | 0.066680603  | -1.711725482 | 3.280078673  |
| H | -1.551096548 | 3.964532018  | 0.801855502  |
| C | 4.380053576  | 0.077839579  | 2.766687913  |
| C | -5.528631707 | 1.533887827  | 1.19978213   |
| H | 7.068445277  | 0.188141087  | 2.499126709  |
| H | -8.115198711 | 0.84666251   | 0.789221993  |
| H | 1.067487115  | -2.744954656 | 4.32141065   |
| H | -2.80521908  | 5.207947975  | 0.79365671   |
| H | 4.547141204  | -2.8830282   | 4.247383736  |
| H | -6.192754065 | 4.35599984   | 0.051422666  |
| H | -4.687307337 | -2.336771762 | 1.969846168  |
| H | 3.635715124  | 3.623781374  | 0.702345925  |
| C | 3.755866905  | -3.421912369 | 3.711342237  |
| C | -5.322183182 | 4.599492875  | -0.570253208 |
| H | -2.657781717 | -4.597056017 | 2.790886626  |
| H | 2.086233811  | 5.753598882  | -0.607161621 |
| C | 6.561509329  | 0.44657807   | 1.573012088  |
| C | -7.431625526 | 0.151133077  | 0.308505916  |
| H | 4.144524239  | -4.428212975 | 3.498219436  |
| H | -5.703302009 | 5.088253345  | -1.478451003 |
| C | 5.167330709  | 0.410666146  | 1.518270422  |
| C | -6.054613587 | 0.357410188  | 0.417951522  |
| H | -4.950110143 | -3.997158125 | 2.517105449  |
| H | 4.217354499  | 5.179870016  | 0.049955401  |
| H | -2.131344368 | -2.957836089 | 2.390489541  |
| H | 1.136259579  | 4.257252791  | -0.467176568 |
| C | -4.769760479 | -3.372504144 | 1.630557778  |
| C | 4.055893474  | 4.116756295  | -0.18132809  |
| C | -2.350159609 | -3.940532707 | 1.963714749  |
| C | 1.830349834  | 4.811083708  | -1.111639027 |
| H | -8.98053956  | -1.11282956  | -0.515752063 |
| H | 8.37344855   | 0.841214776  | 0.464215718  |
| C | 3.404785725  | -2.758917025 | 2.364096171  |
| C | -4.525015268 | 3.346482557  | -0.985906246 |
| H | -5.655529337 | -3.457340978 | 0.990594788  |
| H | 5.041649571  | 3.680138145  | -0.375657151 |
| C | -7.911691541 | -0.938269497 | -0.414824707 |
| C | 7.286041193  | 0.815558421  | 0.441603073  |

|   |              |              |              |
|---|--------------|--------------|--------------|
| H | -1.424091288 | -4.34952609  | 1.549895991  |
| H | 1.273928054  | 5.06742516   | -2.016022329 |
| H | 1.359887025  | -3.583172562 | 2.254275063  |
| H | -2.62442425  | 4.440530907  | -1.256248817 |
| H | 5.542557047  | -2.380843693 | 2.036699924  |
| H | -6.403723968 | 2.268024956  | -1.394246425 |
| C | -3.492875585 | -3.884452895 | 0.924635558  |
| C | 3.125264676  | 4.018625977  | -1.411602998 |
| C | 2.283833002  | -3.556298007 | 1.664615089  |
| C | -3.293848092 | 3.777543737  | -1.81414063  |
| C | 4.680845037  | -2.800281188 | 1.5020894    |
| C | -5.455673792 | 2.505330092  | -1.889923721 |
| H | 4.919317871  | -3.85021428  | 1.280516888  |
| H | -5.695990457 | 3.096959648  | -2.784819611 |
| H | -4.166673843 | -5.907222087 | 1.276367307  |
| H | 4.054798148  | 5.744147514  | -2.330494376 |
| C | 6.593666733  | 1.157153713  | -0.714488648 |
| C | -6.989324136 | -1.799429042 | -1.003495157 |
| H | 2.05883359   | -3.138599733 | 0.679439185  |
| H | -2.714711778 | 2.919062397  | -2.167210484 |
| C | 5.195720936  | 1.103800921  | -0.729014779 |
| C | -5.620118043 | -1.559923332 | -0.856386452 |
| C | -3.792612274 | -5.314252152 | 0.429047449  |
| C | 3.846621861  | 4.69748735   | -2.596949134 |
| H | -4.569664714 | -5.335955175 | -0.345539797 |
| H | 4.812426464  | 4.228883718  | -2.819176102 |
| H | 2.615226105  | -4.594407611 | 1.521037293  |
| H | -3.635568152 | 4.331684225  | -2.700188176 |
| H | -7.319048037 | -2.662620622 | -1.576308978 |
| H | 7.124862197  | 1.453621282  | -1.615099262 |
| H | 4.584458937  | -2.287247229 | 0.544751177  |
| H | -5.000123409 | 1.572322589  | -2.228713407 |
| H | -0.983685047 | -5.045317981 | -0.401569241 |
| H | 1.337203429  | 4.085357117  | -3.899708329 |
| C | -4.619602499 | -2.499180332 | -1.4802024   |
| C | 4.467773544  | 1.464108465  | -2.006508804 |
| H | -2.905987247 | -5.827421219 | 0.044185278  |
| H | 3.252881568  | 4.706698031  | -3.515872027 |
| H | -5.089964868 | -3.470994754 | -1.673379599 |
| H | 5.090376494  | 2.144960668  | -2.598111161 |
| H | -0.173558042 | -3.462575227 | -0.315062923 |
| H | 0.141020888  | 3.245855002  | -2.878862739 |
| C | -0.67479192  | -4.171910942 | -0.984984045 |
| C | 0.851316027  | 3.123758182  | -3.706918373 |
| H | -4.307242719 | -2.10038354  | -2.456154269 |
| H | 4.347137886  | 0.563767569  | -2.621623033 |
| C | -1.84857665  | -3.51799544  | -1.741035842 |

|   |              |              |              |
|---|--------------|--------------|--------------|
| C | 1.84536286   | 1.969421697  | -3.461807338 |
| H | -0.70921505  | -1.67431882  | -2.134110858 |
| H | 0.25682637   | 0.722780756  | -2.607711723 |
| H | 0.071955742  | -4.51112488  | -1.712050537 |
| H | 0.261724578  | 2.876877128  | -4.600550551 |
| C | -1.271096326 | -2.439342254 | -2.679110052 |
| C | 1.01143356   | 0.672816345  | -3.400452251 |
| H | -2.996857843 | -5.39333511  | -2.050102008 |
| H | 3.500844573  | 2.760988705  | -4.699137694 |
| H | -3.335100964 | -4.130432358 | -3.251551774 |
| H | 3.45181022   | 0.980098292  | -4.588620269 |
| C | -2.554468496 | -4.573144291 | -2.620852721 |
| C | 2.841298481  | 1.887114232  | -4.637459544 |
| H | -0.579228926 | -2.921022342 | -3.381844286 |
| H | 0.486281762  | 0.5514281    | -4.359213306 |
| H | -2.04662552  | -1.946076408 | -3.274809093 |
| H | 1.630456368  | -0.210349039 | -3.243470071 |
| H | -1.808667062 | -5.012093714 | -3.29912004  |
| H | 2.270747157  | 1.841731439  | -5.576477775 |
| S | 3.655941962  | -1.87979256  | -2.132702528 |
| O | 3.594794863  | -1.243644992 | -3.466320025 |
| O | 4.997194427  | -2.051428525 | -1.549142089 |
| O | 2.628101099  | -1.313714547 | -1.157252904 |
| C | 3.031038581  | -3.606464368 | -2.463426998 |
| F | 2.873680078  | -4.295627164 | -1.320565911 |
| F | 1.846670291  | -3.559806047 | -3.098992907 |
| F | 3.908877958  | -4.248075437 | -3.235464421 |
| H | 0.954722089  | 3.701248071  | 1.350623511  |
| H | 0.649667075  | 2.747300768  | 2.68449226   |
| H | 0.088180536  | 2.269330419  | 1.17820841   |

---

**Supplementary Table 13 | Cartesian coordinate of VII. Units are presented in Å.**

SCF energy (in toluene) = -4759.65039062 hartree

ZPE = 1.300929 hartree

---

| Atom | Coordinates (Angstroms) |              |              |
|------|-------------------------|--------------|--------------|
|      | X                       | Y            | Z            |
| Mo   | -2.924811878            | -0.084439953 | 0.000810928  |
| Mo   | 2.227885423             | 0.737577683  | 0.48241388   |
| P    | 2.761924421             | -0.634176434 | 2.619828969  |
| P    | -3.636015502            | 2.314840674  | 0.519047444  |
| N    | -5.180332744            | -0.222006742 | -0.07852094  |
| N    | 4.495025027             | 0.779917131  | 0.496635945  |
| P    | 2.742721221             | 2.07986163   | -1.636853994 |
| P    | -3.287483054            | -2.552142603 | -0.568057957 |
| N    | -0.923507871            | 0.069597987  | 0.091425142  |
| N    | 0.222204759             | 0.19020411   | 0.154032495  |
| N    | -3.029128698            | -0.74796598  | 3.099067966  |
| N    | -2.983549467            | -0.505297437 | 1.989803131  |
| N    | -2.866579304            | 0.337906495  | -1.991745443 |
| N    | -2.846388381            | 0.584841446  | -3.099606364 |
| N    | 1.965140971             | 2.103755598  | 1.409732184  |
| H    | 1.996488316             | -0.181225481 | 6.397189141  |
| H    | -3.272534669            | 4.787756241  | 3.510057476  |
| H    | -4.62578659             | 3.704680381  | 3.175894992  |
| H    | 3.50949459              | 0.162364911  | 5.554483669  |
| C    | 2.614131549             | -0.472672637 | 5.534548986  |
| C    | -3.821565632            | 4.28156452   | 2.701749716  |
| H    | -2.973195759            | 1.796432195  | 3.467870397  |
| H    | 2.172226808             | 1.914122917  | 4.212426034  |
| H    | -4.277923513            | 5.059540694  | 2.084743284  |
| H    | 2.925234092             | -1.506851344 | 5.693043483  |
| H    | -1.686766311            | 2.982681663  | 3.718332119  |
| H    | 0.762333722             | 1.399682071  | 5.156915108  |
| C    | 1.331862055             | 1.20973601   | 4.234496399  |
| C    | -2.218370445            | 2.399652887  | 2.951894345  |
| H    | -0.108154286            | -0.856967451 | 5.117949355  |
| H    | -1.122627312            | 4.677153158  | 2.182363098  |
| C    | 1.788269147             | -0.263656102 | 4.246071367  |
| C    | -2.835037008            | 3.376189041  | 1.931886191  |
| H    | -5.006603807            | 1.474142484  | 2.306824413  |
| H    | 4.074760664             | 1.243833743  | 3.320843728  |

|   |              |              |              |
|---|--------------|--------------|--------------|
| H | 0.696915086  | 1.439256943  | 3.376892112  |
| H | -1.499099792 | 1.722209921  | 2.482961693  |
| H | 5.026059108  | -0.209455429 | 3.667725823  |
| H | -5.974375254 | 2.661248169  | 1.432933665  |
| C | 0.522846042  | -1.145482248 | 4.264840562  |
| C | -1.683158385 | 4.221894685  | 1.352961645  |
| H | 2.564252724  | -3.26661789  | 4.514860401  |
| H | -4.057672879 | 5.501383071  | 0.048784545  |
| H | -0.0741467   | -1.007149413 | 3.355412709  |
| H | -0.974687959 | 3.607271799  | 0.783592721  |
| C | 4.387408504  | 0.270282989  | 2.916072282  |
| C | -5.279004073 | 1.822654239  | 1.300068233  |
| H | 7.079592357  | 0.271646351  | 2.615218548  |
| H | -7.940024186 | 1.380640675  | 1.052912364  |
| H | 0.747207863  | -2.212358597 | 4.370557779  |
| H | -2.035843081 | 5.038036558  | 0.713096358  |
| H | 4.260628381  | -2.725197395 | 4.478419154  |
| H | -5.637564219 | 4.703692234  | 0.235201422  |
| H | -4.830422356 | -2.241797771 | 1.951660371  |
| H | 3.870694811  | 3.549618889  | 0.698773165  |
| C | 3.463697885  | -3.202388741 | 3.893696263  |
| C | -4.78591226  | 4.848181076  | -0.44251633  |
| H | -2.885055235 | -4.631190985 | 2.629586912  |
| H | 2.010920595  | 5.663201558  | -0.512654838 |
| C | 6.569315769  | 0.491304415  | 1.680849202  |
| C | -7.357504999 | 0.625989903  | 0.529429495  |
| H | 3.788731272  | -4.233064403 | 3.688256388  |
| H | -5.162897836 | 5.39039533   | -1.322967482 |
| C | 5.172999192  | 0.513657372  | 1.649395921  |
| C | -5.962763416 | 0.701429442  | 0.556064293  |
| H | -5.167401871 | -3.898050442 | 2.469551539  |
| H | 4.284471057  | 5.141581025  | 0.030062007  |
| H | -2.305543941 | -3.002032578 | 2.254318959  |
| H | 1.447855965  | 4.104819179  | 0.134614611  |
| C | -4.984729204 | -3.261074388 | 1.591254991  |
| C | 4.160511874  | 4.076328114  | -0.215671154 |
| C | -2.585661059 | -3.960622169 | 1.809580258  |
| C | 1.792579423  | 4.615723712  | -0.770993036 |
| H | -9.069673639 | -0.478413147 | -0.19827732  |
| H | 8.375796448  | 0.713582842  | 0.51757116   |
| C | 3.227076955  | -2.500903036 | 2.542150251  |
| C | -4.171186377 | 3.514219989  | -0.910471067 |
| H | -5.896774243 | -3.277781121 | 0.982849126  |
| H | 5.136983627  | 3.70593724   | -0.550308771 |
| C | -7.98452792  | -0.406658688 | -0.165169281 |
| C | 7.287767619  | 0.740532086  | 0.514101069  |
| H | -1.696260871 | -4.392605042 | 1.34103496   |

|   |              |              |              |
|---|--------------|--------------|--------------|
| H | 0.979848723  | 4.62106185   | -1.504217648 |
| H | 1.124495404  | -3.13170612  | 2.296312085  |
| H | -2.170414718 | 4.37340489   | -1.280075828 |
| H | 5.396519959  | -2.249450274 | 2.293587425  |
| H | -6.190940986 | 2.688762251  | -1.225774459 |
| C | -3.766289407 | -3.820076136 | 0.822489597  |
| C | 3.077712999  | 3.953443536  | -1.311025368 |
| C | 2.089406901  | -3.21787307  | 1.78060502   |
| C | -2.949198412 | 3.81300631   | -1.806423622 |
| C | 4.53226095   | -2.62706633  | 1.731539769  |
| C | -5.243180786 | 2.800025654  | -1.765551038 |
| H | 4.717368758  | -3.689584171 | 1.521158029  |
| H | -5.445280045 | 3.413744974  | -2.655898695 |
| H | -4.531533649 | -5.812994957 | 1.163668147  |
| H | 3.837208995  | 5.740353127  | -2.263237452 |
| C | 6.591209628  | 1.02701766   | -0.654720185 |
| C | -7.186121697 | -1.344733501 | -0.816417919 |
| H | 1.983531514  | -2.823165276 | 0.765342694  |
| H | -2.500413525 | 2.900336147  | -2.205925216 |
| C | 5.191583273  | 1.049796554  | -0.64305598  |
| C | -5.794196048 | -1.237145773 | -0.757659582 |
| C | -4.162715045 | -5.22010995  | 0.313004506  |
| C | 3.580968733  | 4.710822573  | -2.555302567 |
| H | -4.970586558 | -5.182859376 | -0.429270917 |
| H | 4.487702312  | 4.259683738  | -2.979115333 |
| H | 2.3307156    | -4.288023269 | 1.699852469  |
| H | -3.273918741 | 4.424871636  | -2.661723723 |
| H | -7.631513495 | -2.16695495  | -1.371722852 |
| H | 7.117090836  | 1.228867979  | -1.584187152 |
| H | 4.484470673  | -2.127760374 | 0.763700487  |
| H | -4.926848568 | 1.813410279  | -2.112004253 |
| H | -1.390672634 | -5.081209916 | -0.655552398 |
| H | 0.951483493  | 3.85849289   | -3.556042857 |
| C | -4.926600371 | -2.253370086 | -1.457237389 |
| C | 4.449783741  | 1.363949823  | -1.919939307 |
| H | -3.320691282 | -5.768696374 | -0.120072635 |
| H | 2.828501212  | 4.77627528   | -3.347366924 |
| H | -5.500044804 | -3.170733151 | -1.64172575  |
| H | 5.077053868  | 1.995363185  | -2.562154778 |
| H | -0.492011311 | -3.54494288  | -0.623938275 |
| H | 0.001080689  | 2.724112733  | -2.568566272 |
| C | -1.080092777 | -4.220294657 | -1.257420156 |
| C | 0.660833188  | 2.808325196  | -3.441257504 |
| H | -4.63186816  | -1.858851949 | -2.440533612 |
| H | 4.289007189  | 0.420559051  | -2.465035521 |
| C | -2.267599583 | -3.494483467 | -1.920521488 |
| C | 1.864076981  | 1.849948863  | -3.339291593 |

|   |              |              |              |
|---|--------------|--------------|--------------|
| H | -1.077289102 | -1.69978668  | -2.361922621 |
| H | 0.651939393  | 0.208519288  | -2.52393748  |
| H | -0.404491175 | -4.592134162 | -2.037306373 |
| H | 0.066827813  | 2.534851053  | -4.325306269 |
| C | -1.688239961 | -2.441534041 | -2.885228735 |
| C | 1.316201726  | 0.407901037  | -3.37116729  |
| H | -3.513482187 | -5.313677908 | -2.182379247 |
| H | 3.243730463  | 3.031418683  | -4.613009014 |
| H | -3.904414675 | -3.999177534 | -3.308617038 |
| H | 3.608286896  | 1.289101531  | -4.54763319  |
| C | -3.088825699 | -4.492388592 | -2.764863119 |
| C | 2.801890145  | 2.031631479  | -4.550737043 |
| H | -1.04337665  | -2.949376121 | -3.614764785 |
| H | 0.733680598  | 0.279234341  | -4.296075895 |
| H | -2.466870491 | -1.913945001 | -3.446461951 |
| H | 2.114314837  | -0.337269937 | -3.374357293 |
| H | -2.42440106  | -4.936460703 | -3.520792284 |
| H | 2.221248295  | 1.87116782   | -5.471547991 |
| S | 3.793500353  | -2.240781724 | -2.017687932 |
| O | 4.116441824  | -1.511520418 | -3.271243919 |
| O | 4.892320877  | -3.012923286 | -1.409953484 |
| O | 2.979180375  | -1.425719898 | -1.049172953 |
| C | 2.579455875  | -3.540548652 | -2.572245301 |
| F | 2.169762707  | -4.286047399 | -1.525354346 |
| F | 1.489073823  | -2.975675962 | -3.130350565 |
| F | 3.138790646  | -4.357117208 | -3.475358232 |

---

**Supplementary Table 14 | Cartesian coordinate of VIII. Units are presented in Å.**

SCF energy (in toluene) = -2036.04242654 hartree

ZPE = 0.646560 hartree

---

| Atom | Coordinates (Angstroms) |              |              |
|------|-------------------------|--------------|--------------|
|      | X                       | Y            | Z            |
| Mo   | 2.659031782             | 0.003847832  | 0.008369209  |
| P    | 3.167843185             | -2.187772084 | 1.173564489  |
| N    | 4.906853844             | -0.007006176 | -0.01577229  |
| P    | 3.163919188             | 2.190493396  | -1.168030075 |
| N    | -0.508143769            | 0.018982042  | 0.042746851  |
| N    | 0.627561218             | 0.013603454  | 0.030405016  |
| N    | 2.662630055             | 1.459652118  | 2.825545605  |
| N    | 2.660579558             | 0.929070231  | 1.820843475  |
| N    | 2.612468294             | -0.921232062 | -1.803679598 |
| N    | 2.587683343             | -1.451571597 | -2.808187894 |
| H    | 2.567874951             | -3.759688747 | 4.692952513  |
| H    | 3.96971534              | -2.823388195 | 4.17194231   |
| C    | 3.171438333             | -3.485674866 | 3.814250437  |
| H    | 2.425844126             | -0.839078522 | 3.819871772  |
| H    | 3.632313823             | -4.402358742 | 3.438180152  |
| H    | 1.098194837             | -1.870639728 | 4.362576217  |
| C    | 1.660067706             | -1.541287762 | 3.475510079  |
| H    | 0.456011328             | -3.865804503 | 3.299453632  |
| C    | 2.259907168             | -2.782856672 | 2.785543271  |
| H    | 4.583045111             | -0.998852873 | 2.724041302  |
| H    | 0.970996805             | -0.999607972 | 2.819495308  |
| H    | 5.471467097             | -2.439279022 | 2.222512248  |
| C    | 1.08130661              | -3.704834949 | 2.409012857  |
| H    | 3.353441261             | -5.407803699 | 1.596245137  |
| H    | 0.444785363             | -3.254971913 | 1.636277115  |
| C    | 4.840090478             | -1.620427243 | 1.853681776  |
| H    | 7.529906315             | -1.428800512 | 1.585164276  |
| H    | 1.404826626             | -4.690934288 | 2.059916852  |
| H    | 4.985541238             | -4.703605064 | 1.6078241    |
| H    | 4.586895642             | 2.510699728  | 1.431443644  |
| C    | 4.133138029             | -4.965394645 | 0.967925165  |
| H    | 2.77280051              | 5.040841415  | 1.365740974  |
| C    | 7.008650439             | -0.800835529 | 0.866373158  |
| H    | 4.47570422              | -5.751867209 | 0.278370178  |
| C    | 5.611279997             | -0.780771798 | 0.86354941   |



|   |             |              |              |
|---|-------------|--------------|--------------|
| H | 5.018219022 | 4.224266167  | 1.477764825  |
| H | 2.082092821 | 3.41146625   | 1.347492285  |
| C | 4.819410149 | 3.375694509  | 0.80638095   |
| C | 2.457890629 | 4.215348003  | 0.709481568  |
| H | 8.804228586 | -0.02636472  | -0.05794856  |
| C | 3.630337868 | -3.765645268 | 0.139930314  |
| H | 5.748505437 | 3.168450972  | 0.262075075  |
| C | 7.716190911 | -0.020951537 | -0.046160799 |
| H | 1.626245933 | 4.58214344   | 0.100421341  |
| H | 1.580611626 | -4.564628207 | -0.061448199 |
| H | 5.711716058 | -3.190246672 | -0.311400994 |
| C | 3.663566063 | 3.76380265   | -0.144816697 |
| C | 2.402374745 | -4.205557804 | -0.688265065 |
| C | 4.769282685 | -3.388475719 | -0.835765944 |
| H | 4.94556586  | -4.238815635 | -1.511195284 |
| H | 4.524550091 | 5.741953761  | -0.301597692 |
| C | 6.996851554 | 0.766030252  | -0.943252353 |
| H | 2.02051792  | -3.398061208 | -1.318039147 |
| C | 5.59974615  | 0.759828074  | -0.910165642 |
| C | 4.160025735 | 4.958740343  | -0.983552035 |
| H | 4.996154122 | 4.688899839  | -1.641330826 |
| H | 2.695264658 | -5.033861188 | -1.351155844 |
| H | 7.508641891 | 1.388893739  | -1.673197316 |
| H | 4.531822864 | -2.52118115  | -1.455774679 |
| H | 1.406482908 | 4.710570111  | -2.017101473 |
| C | 4.815666429 | 1.607112843  | -1.883596421 |
| H | 3.371387409 | 5.408464648  | -1.595298852 |
| H | 5.446844387 | 2.420022884  | -2.265691935 |
| H | 0.442138222 | 3.283842693  | -1.572593809 |
| C | 1.066194707 | 3.727574549  | -2.358924065 |
| H | 4.534452264 | 0.988187275  | -2.748370088 |
| C | 2.227609878 | 2.794386132  | -2.760372986 |
| H | 0.921261607 | 1.023549904  | -2.766721664 |
| H | 0.423508514 | 3.894451565  | -3.23579184  |
| C | 1.601371812 | 1.558706111  | -3.437306025 |
| H | 3.60096828  | 4.400936905  | -3.442397685 |
| H | 3.908025158 | 2.818816169  | -4.182677875 |
| C | 3.123712345 | 3.488556612  | -3.808356499 |
| H | 1.023924249 | 1.893501421  | -4.312250871 |
| H | 2.352915134 | 0.849258126  | -3.797825383 |
| H | 2.504253275 | 3.768088938  | -4.674161249 |

---

**Supplementary Table 15 | Cartesian coordinate of IX. Units are presented in Å.**

SCF energy (in toluene) = -2779.48508967 hartree

ZPE = 0.679697 hartree

---

| Atom | Coordinates (Angstroms) |              |              |
|------|-------------------------|--------------|--------------|
|      | X                       | Y            | Z            |
| Mo   | 2.543823026             | 0.411087344  | 0.304962972  |
| P    | 3.112064197             | -0.816271482 | 2.452595458  |
| N    | 4.819973895             | 0.741782854  | 0.396727368  |
| P    | 2.885497538             | 2.084537431  | -1.490692965 |
| N    | -0.409376143            | 1.153250176  | 0.99823078   |
| N    | 0.858593696             | 0.852979878  | 0.679488653  |
| H    | 2.343054054             | 0.076753165  | 6.155909035  |
| H    | 3.913666948             | -0.029009395 | 5.354473619  |
| C    | 2.894183031             | -0.436660801 | 5.353689838  |
| H    | 2.927620783             | 1.886310352  | 3.919072874  |
| H    | 2.950001762             | -1.492440103 | 5.624122728  |
| H    | 1.367080979             | 1.694024606  | 4.726312815  |
| C    | 1.97522642              | 1.340154574  | 3.879986472  |
| H    | 0.187288856             | -0.442514985 | 4.872072221  |
| C    | 2.166797956             | -0.187433479 | 4.014982109  |
| H    | 4.629260146             | 0.865316976  | 3.292881454  |
| H    | 1.468407628             | 1.606777502  | 2.949194325  |
| H    | 5.459758528             | -0.684020981 | 3.369123104  |
| C    | 0.772680906             | -0.847426253 | 4.032711912  |
| H    | 2.572452585             | -3.270557708 | 4.533092202  |
| H    | 0.222080356             | -0.637962716 | 3.107777129  |
| C    | 4.817633669             | -0.062392411 | 2.733689199  |
| H    | 7.494804204             | -0.04554184  | 2.309701134  |
| H    | 0.828440887             | -1.934009354 | 4.167227704  |
| H    | 4.310288375             | -2.881166511 | 4.561676825  |
| H    | 3.862419376             | 3.255554398  | 1.033470441  |
| C    | 3.508540393             | -3.336892515 | 3.966602987  |
| H    | 1.669996928             | 5.26699428   | 0.270369266  |
| C    | 6.945498746             | 0.313187232  | 1.442761896  |
| H    | 3.748283746             | -4.4062851   | 3.865468769  |
| C    | 5.549070721             | 0.315306381  | 1.4681052    |
| H    | 4.013786769             | 4.99458937   | 0.69436015   |
| H    | 1.377496274             | 3.547636677  | 0.617332491  |
| C    | 4.035856241             | 3.992599945  | 0.240153112  |
| C    | 1.603727927             | 4.265671126  | -0.181114125 |

|   |              |              |              |
|---|--------------|--------------|--------------|
| H | 8.703009468  | 0.786173175  | 0.277896343  |
| C | 3.401719698  | -2.728443914 | 2.556973606  |
| H | 5.045604622  | 3.836929945  | -0.158768687 |
| C | 7.615514285  | 0.783279312  | 0.315722283  |
| H | 0.765168737  | 4.276526066  | -0.884502704 |
| H | 1.257327829  | -3.161845281 | 2.254277927  |
| H | 5.596599117  | -2.704582012 | 2.374848479  |
| C | 2.948151823  | 3.915456668  | -0.85404903  |
| C | 2.229752542  | -3.39037626  | 1.798938719  |
| C | 4.715323256  | -3.034915907 | 1.808845588  |
| H | 4.80397298   | -4.124268532 | 1.684858212  |
| H | 3.411565684  | 5.946750689  | -1.452572653 |
| C | 6.866730962  | 1.259349459  | -0.757776777 |
| H | 2.20496844   | -3.072580281 | 0.751920475  |
| C | 5.470964051  | 1.224352686  | -0.699991838 |
| C | 3.286271656  | 4.963368328  | -1.931147348 |
| H | 4.226150364  | 4.734622392  | -2.449946811 |
| H | 2.356694744  | -4.483315778 | 1.820526879  |
| H | 7.352011711  | 1.639035029  | -1.653452535 |
| H | 4.753306378  | -2.601949324 | 0.806683828  |
| H | 0.78074871   | 3.895661883  | -3.031496793 |
| C | 4.667566875  | 1.690899871  | -1.894941765 |
| H | 2.49844638   | 5.069480679  | -2.684063331 |
| H | 5.192863849  | 2.515835564  | -2.39438956  |
| H | 0.039422986  | 2.457206206  | -2.291209632 |
| C | 0.657408883  | 2.811462562  | -3.127333991 |
| H | 4.625101661  | 0.847711487  | -2.601821592 |
| C | 1.99549      | 2.049175729  | -3.207690656 |
| H | 1.059405513  | 0.129618939  | -2.698400073 |
| H | 0.090903237  | 2.629752929  | -4.052480022 |
| C | 1.669007799  | 0.569883302  | -3.496374939 |
| H | 3.102648301  | 3.656824032  | -4.257597772 |
| H | 3.774305361  | 2.029256407  | -4.498770006 |
| C | 2.845890335  | 2.598572549  | -4.371294774 |
| H | 1.100478806  | 0.510302776  | -4.437399403 |
| H | 2.56772968   | -0.042523699 | -3.606283541 |
| H | 2.276699     | 2.498206778  | -5.307878983 |
| H | -0.56781326  | 2.148544079  | 1.167909318  |
| S | 4.056777356  | -2.087775663 | -1.969034381 |
| O | 4.402978764  | -1.19535193  | -3.100475362 |
| O | 5.141784748  | -2.931527722 | -1.442851517 |
| O | 3.218086967  | -1.436336993 | -0.885228582 |
| C | 2.810545059  | -3.2791059   | -2.677410508 |
| F | 2.377470098  | -4.124432748 | -1.726619731 |
| F | 1.748059144  | -2.619723417 | -3.171282095 |
| F | 3.366299123  | -3.99342107  | -3.665039201 |
| H | -1.092194081 | 0.762945582  | 0.346312067  |

**Supplementary Table 16 | Cartesian coordinate of X. Units are presented in Å.**

SCF energy (in toluene) = -2779.89642593 hartree

ZPE = 0.693512 hartree

---

| Atom | Coordinates (Angstroms) |              |              |
|------|-------------------------|--------------|--------------|
|      | X                       | Y            | Z            |
| Mo   | -0.087599173            | -0.532788822 | -0.704128949 |
| P    | 2.185305993             | -1.37841144  | -0.079536441 |
| N    | -0.212800431            | -0.690744436 | 1.694965242  |
| P    | -2.575492022            | -0.425750657 | -0.120873092 |
| N    | 0.41610222              | 1.048227851  | -3.11315416  |
| N    | 0.12803547              | -0.273856939 | -2.524925169 |
| H    | 3.23714817              | -5.002836989 | -0.987186835 |
| H    | 2.934698861             | -4.340184699 | 0.620785511  |
| C    | 3.269186298             | -4.079460144 | -0.391209116 |
| H    | 0.486742976             | -3.795512315 | -0.17522473  |
| H    | 4.315363847             | -3.766084013 | -0.333646613 |
| H    | 0.935991261             | -4.525545502 | -1.718664205 |
| C    | 0.928596813             | -3.57988771  | -1.156830927 |
| H    | 2.831757967             | -3.657149128 | -3.079164975 |
| C    | 2.369095437             | -3.021397641 | -1.059969462 |
| H    | 1.537213741             | -2.988266245 | 1.618246485  |
| H    | 0.255683377             | -2.904936168 | -1.716225748 |
| H    | 2.832837849             | -1.987879916 | 2.248013442  |
| C    | 2.872370285             | -2.731237579 | -2.488299229 |
| H    | 5.24994675              | -1.823398868 | -0.844594144 |
| H    | 2.245035704             | -1.986909203 | -2.994250684 |
| C    | 1.898049467             | -1.951785514 | 1.67805799   |
| H    | 1.827366916             | -1.296750375 | 4.322530523  |
| H    | 3.912069554             | -2.385846525 | -2.498864605 |
| H    | 5.074803495             | -1.868900772 | 0.925768175  |
| H    | -1.57290243             | -3.00218433  | 1.039706046  |
| C    | 5.07945256              | -1.210852156 | 0.047351248  |
| H    | -3.719344465            | -3.998279066 | -0.852242877 |
| C    | 0.952318118             | -0.939752511 | 3.785605509  |
| H    | 5.944606124             | -0.540746909 | 0.151935341  |
| C    | 0.856213158             | -1.136122269 | 2.408662796  |
| H    | -3.068227132            | -3.856733483 | 1.453762656  |
| H    | -2.307741478            | -3.096658699 | -1.430115235 |
| C    | -2.626323347            | -2.86109404  | 1.308882428  |
| C    | -3.341737303            | -2.990491545 | -1.075395294 |

|   |              |              |              |
|---|--------------|--------------|--------------|
| H | -0.033288349 | -0.133082405 | 5.531393691  |
| C | 3.802902063  | -0.354696742 | -0.047128176 |
| H | -2.66659997  | -2.34294592  | 2.273625839  |
| C | -0.0890953   | -0.301246012 | 4.458127557  |
| H | -3.940286552 | -2.592012613 | -1.898809468 |
| H | 3.82151421   | -0.092061469 | -2.242586466 |
| H | 3.871158485  | 0.031000134  | 2.121289663  |
| C | -3.420207052 | -2.128870874 | 0.204029919  |
| C | 3.832845084  | 0.510150369  | -1.325985177 |
| C | 3.740107316  | 0.579708135  | 1.180309678  |
| H | 4.569621492  | 1.297794697  | 1.11314085   |
| H | -5.258096028 | -3.012207646 | 0.927821513  |
| C | -1.206919385 | 0.102405025  | 3.735697931  |
| H | 2.986675031  | 1.20636498   | -1.339657553 |
| C | -1.243898068 | -0.099895752 | 2.352243343  |
| C | -4.882772108 | -2.009796437 | 0.677131408  |
| H | -4.979047201 | -1.395411494 | 1.581840074  |
| H | 4.755146466  | 1.107429493  | -1.335594259 |
| H | -2.044274016 | 0.590041735  | 4.228215721  |
| H | 2.809566809  | 1.152696968  | 1.241571024  |
| H | -5.150431779 | -0.771346913 | -1.963926222 |
| C | -2.450100242 | 0.368460287  | 1.565324044  |
| H | -5.548145378 | -1.599853709 | -0.088800932 |
| H | -3.359436606 | 0.235204067  | 2.165943607  |
| H | -3.672645041 | -0.524933088 | -2.923950754 |
| C | -4.415324139 | -0.027840407 | -2.286625655 |
| H | -2.348096213 | 1.44832154   | 1.382449953  |
| C | -3.760030855 | 0.728627407  | -1.112948186 |
| H | -2.218552547 | 1.472790532  | -2.465844682 |
| H | -4.949493701 | 0.701334009  | -2.911639584 |
| C | -2.913355184 | 1.868747558  | -1.714400543 |
| H | -5.469765526 | 0.602665721  | 0.291598348  |
| H | -4.423268817 | 2.016659088  | 0.546509506  |
| C | -4.849134403 | 1.350036999  | -0.211950666 |
| H | -3.586475472 | 2.574363359  | -2.22237102  |
| H | -2.345277417 | 2.425412077  | -0.964110123 |
| H | -5.514996201 | 1.960233727  | -0.83852727  |
| H | -0.304600157 | 1.289002059  | -3.806076748 |
| S | 0.245349562  | 2.732539455  | 0.557591478  |
| O | -1.10938386  | 3.296970139  | 0.676473625  |
| O | 0.947335655  | 2.350258591  | 1.788379745  |
| O | 0.347574249  | 1.649118777  | -0.54355041  |
| C | 1.28018391   | 4.04161934   | -0.281652863 |
| F | 2.560027031  | 3.646090344  | -0.335807584 |
| F | 0.837094236  | 4.218862134  | -1.544552192 |
| F | 1.193104104  | 5.188141     | 0.380001553  |
| H | 0.435641675  | 1.766558704  | -2.34933828  |

H 1.324037558 1.027603791 -3.595498159

---

**Supplementary Table 17 | Cartesian coordinate of XI. Units are presented in Å.**

SCF energy (in toluene) = -2723.59879416 hartree

ZPE = 0.652246 hartree

---

| Atom | Coordinates (Angstroms) |              |              |
|------|-------------------------|--------------|--------------|
|      | X                       | Y            | Z            |
| Mo   | 2.583513278             | 0.730782997  | 0.409409573  |
| P    | 2.995062843             | -0.769789456 | 2.416464735  |
| N    | 4.757091388             | 1.126657939  | 0.815022187  |
| P    | 3.244896452             | 1.976654377  | -1.679615958 |
| N    | 1.879410911             | 1.923562635  | 1.330637526  |
| H    | 1.762388891             | -1.619454027 | 5.980769889  |
| H    | 3.361986914             | -1.055123373 | 5.481143387  |
| C    | 2.476762123             | -1.610966812 | 5.144165766  |
| H    | 2.088601597             | 1.046588563  | 4.815384926  |
| H    | 2.771805811             | -2.649512006 | 4.959980453  |
| H    | 0.490260479             | 0.334297345  | 5.044844567  |
| C    | 1.310307485             | 0.450557362  | 4.321788555  |
| H    | -0.116999127            | -1.845221245 | 4.355484762  |
| C    | 1.802813318             | -0.958598675 | 3.920513181  |
| H    | 3.64591389              | 1.279415371  | 3.452814163  |
| H    | 0.930210823             | 1.015158552  | 3.463468692  |
| H    | 4.820267747             | 0.071392837  | 4.004476248  |
| C    | 0.563370005             | -1.773797338 | 3.493667564  |
| H    | 4.902285143             | -2.563573034 | 4.115334066  |
| H    | 0.019507253             | -1.29046129  | 2.675640766  |
| C    | 4.272764212             | 0.438989547  | 3.128152062  |
| H    | 6.884999939             | 1.088090122  | 3.450642577  |
| H    | 0.80409459              | -2.792233343 | 3.178113665  |
| H    | 5.937856171             | -1.740625382 | 2.927227283  |
| H    | 3.442912966             | 3.853925235  | 0.576391667  |
| C    | 5.200580173             | -2.542380245 | 3.06092807   |
| H    | 1.297572487             | 5.214904784  | -1.220843538 |
| C    | 6.550870125             | 1.245534546  | 2.428236408  |
| H    | 5.712848759             | -3.491964812 | 2.845395877  |
| C    | 5.227972755             | 0.944667155  | 2.089368545  |
| H    | 3.50558259              | 5.451326728  | -0.194979208 |
| H    | 1.100474642             | 3.632067012  | -0.432898949 |
| C    | 3.737524951             | 4.385376505  | -0.334878186 |
| C    | 1.456907929             | 4.1327868    | -1.339607812 |
| H    | 8.44799931              | 1.992736359  | 1.712159273  |

---

|   |              |              |              |
|---|--------------|--------------|--------------|
| C | 3.997308672  | -2.39376266  | 2.108750592  |
| H | 4.824934241  | 4.303419404  | -0.461262911 |
| C | 7.417318648  | 1.749107017  | 1.462441393  |
| H | 0.841466908  | 3.798690014  | -2.18266913  |
| H | 2.772116456  | -3.845316132 | 3.235876429  |
| H | 5.178783886  | -1.464357829 | 0.486204582  |
| C | 2.961933017  | 3.872905698  | -1.568903    |
| C | 3.10008858   | -3.64483715  | 2.210216815  |
| C | 4.514593457  | -2.320981908 | 0.652814615  |
| H | 5.089638867  | -3.231963834 | 0.428337483  |
| H | 3.359102042  | 5.727825947  | -2.604871093 |
| C | 6.936210587  | 1.933785939  | 0.167419716  |
| H | 2.221264661  | -3.566535746 | 1.562336194  |
| C | 5.612409232  | 1.609609717  | -0.136415712 |
| C | 3.440857553  | 4.650105438  | -2.809005804 |
| H | 4.490351469  | 4.444558683  | -3.058567611 |
| H | 3.685800356  | -4.516906212 | 1.88196965   |
| H | 7.580528423  | 2.324616963  | -0.616406577 |
| H | 3.68012728   | -2.275717026 | -0.058999727 |
| H | 1.271737439  | 2.639945432  | -3.98580946  |
| C | 5.116290643  | 1.759780511  | -1.552367055 |
| H | 2.826791799  | 4.440961746  | -3.691775672 |
| H | 5.678560232  | 2.549590504  | -2.06684166  |
| H | 0.760379795  | 1.193670361  | -3.07493594  |
| C | 1.458832188  | 1.570329103  | -3.83173764  |
| H | 5.332855787  | 0.827364578  | -2.09274885  |
| C | 2.924347705  | 1.283406873  | -3.444956342 |
| H | 2.40096366   | -0.700719998 | -2.642543027 |
| H | 1.230640464  | 1.060264005  | -4.779247946 |
| C | 3.102331257  | -0.250811702 | -3.350358867 |
| H | 3.757109609  | 2.877811328  | -4.736355205 |
| H | 4.93229976   | 1.622816835  | -4.298403971 |
| C | 3.877218777  | 1.809410168  | -4.538297683 |
| H | 2.906373231  | -0.687833962 | -4.340550882 |
| H | 4.124880091  | -0.543687207 | -3.073754975 |
| H | 3.66433001   | 1.277011774  | -5.477286327 |
| S | 0.089146906  | -1.419983755 | -0.335890063 |
| O | 0.797085184  | -2.654910767 | 0.055771813  |
| O | -1.021706026 | -0.957066605 | 0.506478993  |
| O | 1.044678771  | -0.29867308  | -0.773504031 |
| C | -0.667275678 | -1.796842083 | -1.997369384 |
| F | -1.227645381 | -0.695393523 | -2.521999249 |
| F | 0.272695625  | -2.243010908 | -2.850573339 |
| F | -1.608103164 | -2.739623976 | -1.867002721 |

---



**Supplementary Table 18 | Cartesian coordinate of XII. Units are presented in Å.**

SCF energy (in toluene) = -2724.16007909 hartree

ZPE = 0.659619 hartree

---

| Atom | Coordinates (Angstroms) |              |              |
|------|-------------------------|--------------|--------------|
|      | X                       | Y            | Z            |
| Mo   | -0.46557288             | 0.04962626   | -0.09442448  |
| P    | -1.424416763            | -2.217968855 | 0.558353543  |
| N    | -1.919728212            | -0.23348405  | -1.69912721  |
| P    | -0.82598655             | 2.397945233  | -0.859908169 |
| N    | 0.943409506             | -0.290738103 | -1.130450282 |
| H    | -0.491633022            | -5.855901291 | -0.34949788  |
| H    | -2.099859598            | -5.125149911 | -0.275420628 |
| C    | -1.085209757            | -5.070401584 | 0.141201108  |
| H    | -1.245013406            | -3.612871679 | -2.165986335 |
| H    | -1.132461204            | -5.318251039 | 1.206164821  |
| H    | 0.369051989             | -4.330838256 | -2.038456797 |
| C    | -0.280325784            | -3.533180563 | -1.648939084 |
| H    | 1.592839111             | -4.49852419  | 0.077067477  |
| C    | -0.413307798            | -3.709117676 | -0.120974804 |
| H    | -3.317462342            | -3.155084003 | -0.814102163 |
| H    | 0.173894921             | -2.571900504 | -1.907726372 |
| H    | -3.722882116            | -1.702866817 | 0.093196441  |
| C    | 0.994192337             | -3.681879428 | 0.508806563  |
| H    | -3.127304329            | -4.607046965 | 1.781818043  |
| H    | 1.503488786             | -2.733466562 | 0.309221165  |
| C    | -2.946071656            | -2.160005561 | -0.538726332 |
| H    | -4.292092461            | -2.375020553 | -2.847285128 |
| H    | 0.970340865             | -3.817823682 | 1.5944459    |
| H    | -4.245497191            | -3.249490307 | 1.539333307  |
| H    | 1.981340696             | 1.960275954  | -1.448158463 |
| C    | -3.424067161            | -3.624892546 | 2.16200653   |
| H    | 2.055368391             | 4.52717406   | 0.423260928  |
| C    | -3.630403401            | -1.511555484 | -2.855943652 |
| H    | -3.834143976            | -3.776624177 | 3.171474023  |
| C    | -2.803053432            | -1.291567862 | -1.758392243 |
| H    | 2.686801079             | 3.578492705  | -1.655255398 |
| H    | 1.502731049             | 2.915882361  | 0.925533548  |
| C    | 1.771441027             | 2.983340678  | -1.783188427 |
| C    | 1.183334829             | 3.858344958  | 0.473199161  |
| H    | -4.270492728            | -0.786053971 | -4.798277729 |

|   |              |              |              |
|---|--------------|--------------|--------------|
| C | -2.244144976 | -2.633269065 | 2.260949157  |
| H | 1.547295702  | 2.968628276  | -2.85784695  |
| C | -3.628892539 | -0.624923818 | -3.935399896 |
| H | 0.452285782  | 4.323146764  | 1.14140053   |
| H | -0.885417011 | -4.203987711 | 2.99121723   |
| H | -3.500710461 | -0.816714822 | 2.121707503  |
| C | 0.643065257  | 3.640133658  | -0.956606446 |
| C | -1.200580574 | -3.186580424 | 3.252476935  |
| C | -2.783069024 | -1.290529028 | 2.807505551  |
| H | -3.316351655 | -1.47865398  | 3.75091456   |
| H | 1.19846975   | 5.594423788  | -1.701521561 |
| C | -2.796396217 | 0.49155189   | -3.850787918 |
| H | -0.310037421 | -2.555148615 | 3.321367421  |
| C | -1.965992275 | 0.67218012   | -2.746942706 |
| C | 0.28412816   | 4.989959476  | -1.606983133 |
| H | -0.131178285 | 4.868497604  | -2.616440001 |
| H | -1.656132706 | -3.23382755  | 4.252484781  |
| H | -2.779759536 | 1.233999453  | -4.64592042  |
| H | -1.979191933 | -0.579976765 | 3.024664668  |
| H | -1.584807648 | 5.012589486  | 0.755133866  |
| C | -1.098442751 | 1.901535706  | -2.652437405 |
| H | -0.425898986 | 5.572162492  | -1.009443227 |
| H | -0.088571143 | 1.668879284  | -3.011177282 |
| H | -1.716290879 | 3.536945107  | 1.740066488  |
| C | -2.198511546 | 4.126795484  | 0.950365713  |
| H | -1.492885395 | 2.698920094  | -3.294993983 |
| C | -2.451316513 | 3.285476615  | -0.317427489 |
| H | -3.125040062 | 1.563480931  | 0.880674237  |
| H | -3.164245924 | 4.479581018  | 1.34127845   |
| C | -3.478616395 | 2.190890781  | 0.052308302  |
| H | -2.391868875 | 4.948196698  | -1.776874874 |
| H | -3.371882493 | 3.560167716  | -2.294376012 |
| C | -3.066149528 | 4.160252126  | -1.428092353 |
| H | -4.41086033  | 2.676722146  | 0.377521145  |
| H | -3.719682628 | 1.539228986  | -0.794522129 |
| H | -3.971522721 | 4.649300676  | -1.038466125 |
| S | 0.911540264  | 0.082587539  | 3.048663729  |
| O | 0.126201658  | 0.19068768   | 4.288567084  |
| O | 1.494379867  | -1.226983716 | 2.704960317  |
| O | 0.229262059  | 0.783134816  | 1.863308173  |
| C | 2.374226692  | 1.214759083  | 3.284111025  |
| F | 3.108556601  | 1.270554337  | 2.159482998  |
| F | 1.965146273  | 2.458210342  | 3.585032082  |
| F | 3.145807213  | 0.761752996  | 4.280009104  |
| H | 1.081220374  | -0.500193908 | -2.13643322  |

---

**Supplementary Table 19 | Cartesian coordinate of XIII. Units are presented in Å.**

SCF energy (in toluene) = -2833.66915087 hartree

ZPE = 0.670964 hartree

---

| Atom | Coordinates (Angstroms) |              |              |
|------|-------------------------|--------------|--------------|
|      | X                       | Y            | Z            |
| Mo   | -0.331746965            | 0.588211857  | 0.384911767  |
| P    | 0.345354832             | -0.881270949 | 2.456881255  |
| N    | 1.854007513             | 1.031342458  | 0.698688477  |
| P    | 0.261712061             | 2.064082234  | -1.653581534 |
| N    | -0.76999767             | 1.965947074  | 1.505005982  |
| H    | -1.143370689            | -1.778287848 | 5.932414017  |
| H    | 0.457495088             | -1.109141695 | 5.587022174  |
| C    | -0.347335096            | -1.731565546 | 5.174401428  |
| H    | -0.854948492            | 0.911353767  | 4.692297669  |
| H    | 0.033347232             | -2.749037652 | 5.042646459  |
| H    | -2.380882291            | 0.050995029  | 4.944375337  |
| C    | -1.567498189            | 0.220922682  | 4.224117409  |
| H    | -2.832499264            | -2.159975587 | 4.102043581  |
| C    | -0.933395111            | -1.142276298 | 3.876809772  |
| H    | 0.766968332             | 1.334244168  | 3.295971871  |
| H    | -1.993467064            | 0.710383486  | 3.343873427  |
| H    | 2.032859142             | 0.270637277  | 3.966966041  |
| C    | -2.050384032            | -2.06180142  | 3.334270405  |
| H    | 2.092822739             | -2.399867048 | 4.551324778  |
| H    | -2.508067116            | -1.651458932 | 2.428239782  |
| C    | 1.458397299             | 0.514943471  | 3.066921457  |
| H    | 4.084501115             | 1.247610592  | 3.231198479  |
| H    | -1.69237547             | -3.065494201 | 3.090152047  |
| H    | 3.256910049             | -1.522581831 | 3.535054212  |
| H    | 0.428987968             | 3.656022738  | 0.87157071   |
| C    | 2.574755628             | -2.380854705 | 3.569786047  |
| H    | -1.004179601            | 5.610860861  | -1.096087525 |
| C    | 3.705945614             | 1.303859399  | 2.213608276  |
| H    | 3.197449521             | -3.284438145 | 3.494087018  |
| C    | 2.373148843             | 0.967890567  | 1.959706497  |
| H    | 0.89947379              | 5.28388236   | 0.310767679  |
| H    | -1.688883827            | 4.042463111  | -0.626746671 |
| C    | 0.972098093             | 4.206910036  | 0.096302696  |
| C    | -1.038353776            | 4.542735816  | -1.355222364 |
| H    | 5.572217234             | 1.961849483  | 1.343550131  |

---

|   |              |              |              |
|---|--------------|--------------|--------------|
| C | 1.580583684  | -2.381847868 | 2.385966631  |
| H | 2.033810608  | 3.937631093  | 0.151328153  |
| C | 4.53108108   | 1.701952274  | 1.163138903  |
| H | -1.502102199 | 4.459931047  | -2.345139201 |
| H | 0.334108134  | -3.939810751 | 3.32658823   |
| H | 3.045991798  | -1.384499731 | 1.068920107  |
| C | 0.391240376  | 3.963993676  | -1.31495395  |
| C | 0.81376978   | -3.721129406 | 2.365747015  |
| C | 2.421541801  | -2.284280116 | 1.091095619  |
| H | 3.099112351  | -3.150355016 | 1.062488865  |
| H | 1.417494301  | 5.752631406  | -1.951978653 |
| C | 3.99768979   | 1.759114197  | -0.123610051 |
| H | 0.055223425  | -3.753976391 | 1.578190311  |
| C | 2.656886068  | 1.424945357  | -0.328871704 |
| C | 1.306890487  | 4.717083799  | -2.305502889 |
| H | 2.315805626  | 4.285478988  | -2.341460884 |
| H | 1.533249974  | -4.529604214 | 2.171142381  |
| H | 4.609048703  | 2.06135365   | -0.970253036 |
| H | 1.817492333  | -2.317211998 | 0.182911834  |
| H | -2.444472305 | 2.406385157  | -2.84268436  |
| C | 2.047065113  | 1.466139486  | -1.705973288 |
| H | 0.915828309  | 4.762523268  | -3.322779105 |
| H | 2.68545571   | 2.029433669  | -2.397451236 |
| H | -2.171980764 | 0.664169439  | -2.643608967 |
| C | -1.94706667  | 1.528375142  | -3.273789846 |
| H | 1.979003604  | 0.436459626  | -2.081692135 |
| C | -0.424083861 | 1.73345654   | -3.433525894 |
| H | 0.156749389  | -0.38855284  | -3.247799144 |
| H | -2.390849021 | 1.349233081  | -4.264143371 |
| C | 0.204922946  | 0.429778388  | -3.969236547 |
| H | -0.683899838 | 3.771283602  | -4.258253116 |
| H | 0.892023511  | 3.031205865  | -4.639757598 |
| C | -0.174872842 | 2.828914769  | -4.487797192 |
| H | -0.349686907 | 0.116475651  | -4.86497326  |
| H | 1.250525205  | 0.579085534  | -4.269633305 |
| H | -0.577074906 | 2.472896828  | -5.447869158 |
| S | -0.622915474 | -2.626982622 | -1.090052089 |
| O | 0.398494557  | -3.631796928 | -1.42115567  |
| O | -1.498432953 | -2.87989411  | 0.071027543  |
| O | -0.065006998 | -1.204196454 | -1.12091806  |
| C | -1.794467413 | -2.653843641 | -2.543775011 |
| F | -2.732674872 | -1.69559267  | -2.423550674 |
| F | -1.134329095 | -2.456398797 | -3.698323705 |
| F | -2.405804542 | -3.8420822   | -2.600015272 |
| N | -2.330456562 | 0.207038688  | 0.133964308  |
| N | -3.44526954  | 0.054798279  | 0.046878968  |
| H | -1.744633999 | 2.250447486  | 1.706150778  |

-----

**Supplementary Table 20 | Cartesian coordinate of XIV. Units are presented in Å.**

SCF energy (in toluene) = -2834.28035937 hartree

ZPE = 0.685336 hartree

---

| Atom | Coordinates (Angstroms) |              |              |
|------|-------------------------|--------------|--------------|
|      | X                       | Y            | Z            |
| Mo   | -0.340549375            | 0.6615316    | 0.466625953  |
| P    | 0.353693507             | -0.951939655 | 2.440003058  |
| N    | 1.823997944             | 1.088307471  | 0.793945033  |
| P    | 0.27926516              | 2.09215135   | -1.659110849 |
| H    | -0.99841343             | -1.92212065  | 5.944552009  |
| H    | 0.5565577               | -1.179556143 | 5.540169397  |
| C    | -0.233188045            | -1.840441544 | 5.158161328  |
| H    | -0.927865949            | 0.790842413  | 4.636923051  |
| H    | 0.191036364             | -2.840194124 | 5.016482096  |
| H    | -2.360572177            | -0.179793357 | 4.995583478  |
| C    | -1.604507571            | 0.031384684  | 4.22544186   |
| H    | -2.733946315            | -2.386828394 | 4.161285395  |
| C    | -0.890570624            | -1.292791213 | 3.875987046  |
| H    | 0.804961995             | 1.143208991  | 3.54067388   |
| H    | -2.122305615            | 0.453801417  | 3.359133077  |
| H    | 2.110070593             | 0.03573333   | 3.969382801  |
| C    | -1.972560427            | -2.274291269 | 3.374738855  |
| H    | 2.219648354             | -2.505714344 | 4.377392885  |
| H    | -2.463064152            | -1.908575824 | 2.467708023  |
| C    | 1.48485934              | 0.384465926  | 3.140850919  |
| H    | 4.025168836             | 1.295077656  | 3.366367667  |
| H    | -1.574152026            | -3.266631321 | 3.15132186   |
| H    | 3.344132719             | -1.626533777 | 3.316656884  |
| H    | -0.136080601            | 4.14435076   | 0.626037113  |
| C    | 2.651335681             | -2.474758354 | 3.372529757  |
| H    | -1.098679561            | 5.657259688  | -1.614132842 |
| C    | 3.654281393             | 1.397257661  | 2.348931014  |
| H    | 3.254247857             | -3.386042523 | 3.247967091  |
| C    | 2.350553862             | 0.985715069  | 2.057154604  |
| H    | 0.757691331             | 5.531219176  | -0.027994835 |
| H    | -1.846066693            | 4.098629158  | -1.214061284 |
| C    | 0.659145798             | 4.436035767  | -0.062206633 |
| C    | -1.077420803            | 4.579444513  | -1.833406688 |
| H    | 5.475672323             | 2.258849021  | 1.558565331  |
| C    | 1.595856179             | -2.442681228 | 2.243567447  |

---

|   |              |              |              |
|---|--------------|--------------|--------------|
| H | 1.604876012  | 4.00790721   | 0.290570847  |
| C | 4.461082748  | 1.929642262  | 1.345434009  |
| H | -1.360150957 | 4.45548707   | -2.883608541 |
| H | 0.454036959  | -4.064594689 | 3.20284211   |
| H | 2.943678932  | -1.343865254 | 0.889169586  |
| C | 0.326162654  | 4.023805054  | -1.511381921 |
| C | 0.854826216  | -3.79545939  | 2.218235961  |
| C | 2.361050346  | -2.271392925 | 0.911164774  |
| H | 3.06992572   | -3.10744946  | 0.815982517  |
| H | 1.351827207  | 5.769782298  | -2.267346722 |
| C | 3.937056277  | 2.009964143  | 0.054125868  |
| H | 0.04089194   | -3.81249197  | 1.488395136  |
| C | 2.635386168  | 1.57642196   | -0.196725943 |
| C | 1.398152263  | 4.679845121  | -2.409233454 |
| H | 2.410124504  | 4.364940159  | -2.124214015 |
| H | 1.575776626  | -4.577215706 | 1.93791377   |
| H | 4.537593271  | 2.391358609  | -0.76843182  |
| H | 1.707178738  | -2.291130739 | 0.03782556   |
| H | -2.322487306 | 2.375018828  | -3.16129129  |
| C | 2.080399264  | 1.567931243  | -1.595239232 |
| H | 1.265816076  | 4.484872962  | -3.473841745 |
| H | 2.730366198  | 2.123743068  | -2.281628189 |
| H | -2.111889647 | 0.689443502  | -2.660979017 |
| C | -1.810807234 | 1.434625461  | -3.400782958 |
| H | 2.053353175  | 0.523505906  | -1.934134355 |
| C | -0.277772623 | 1.608417043  | -3.457126497 |
| H | 0.290818247  | -0.494182193 | -3.061538158 |
| H | -2.173489662 | 1.101438677  | -4.384056728 |
| C | 0.388220013  | 0.266809673  | -3.837341874 |
| H | -0.408866034 | 3.579054727  | -4.470265781 |
| H | 1.15512793   | 2.752594289  | -4.684138774 |
| C | 0.073321525  | 2.602984457  | -4.581587366 |
| H | -0.096907463 | -0.11662085  | -4.745747823 |
| H | 1.452092565  | 0.402591429  | -4.071966225 |
| H | -0.282170521 | 2.175777123  | -5.531079317 |
| S | -0.854228345 | -2.469012776 | -1.009840774 |
| O | 0.03340331   | -3.500829115 | -1.564363723 |
| O | -1.586116738 | -2.769138646 | 0.235132812  |
| O | -0.16626932  | -1.100927839 | -0.989759217 |
| C | -2.215699416 | -2.29885252  | -2.279507468 |
| F | -3.096005617 | -1.348916646 | -1.921095921 |
| F | -1.717866965 | -1.981490915 | -3.488346856 |
| F | -2.864432973 | -3.464741087 | -2.380235393 |
| N | -2.329628019 | 0.477699137  | 0.424557686  |
| N | -3.462547801 | 0.490416934  | 0.517442512  |
| N | -0.625025822 | 2.120119614  | 1.721326508  |
| H | -1.544679986 | 2.38044182   | 2.091184682  |

H            0.0864368    2.738186956    2.124352349

---



**Supplementary Table 21 | Cartesian coordinate of XV. Units are presented in Å.**

SCF energy (in toluene) = -2834.87044070 hartree

ZPE = 0.697281 hartree

---

| Atom | Coordinates (Angstroms) |              |              |
|------|-------------------------|--------------|--------------|
|      | X                       | Y            | Z            |
| Mo   | -0.291080171            | 0.477582874  | 0.32830479   |
| P    | 0.322995639             | -0.91768583  | 2.400825447  |
| N    | 1.845790627             | 1.000813457  | 0.672304147  |
| P    | 0.285221807             | 2.05195651   | -1.620786606 |
| H    | -1.14032503             | -1.728337351 | 5.925175832  |
| H    | 0.414353557             | -0.966284835 | 5.553244889  |
| C    | -0.340649127            | -1.667067758 | 5.171263512  |
| H    | -1.032956102            | 0.922957286  | 4.438339417  |
| H    | 0.114805515             | -2.659790408 | 5.102894052  |
| H    | -2.450851453            | -0.039104995 | 4.856775937  |
| C    | -1.69266364             | 0.121172654  | 4.07656675   |
| H    | -2.823246488            | -2.266714655 | 4.058300731  |
| C    | -0.944198856            | -1.206800791 | 3.831369249  |
| H    | 0.762353333             | 1.309518606  | 3.313927423  |
| H    | -2.220335253            | 0.453701821  | 3.176747961  |
| H    | 1.998076205             | 0.232115675  | 3.942761348  |
| C    | -1.991496275            | -2.231641497 | 3.338198227  |
| H    | 2.124475485             | -2.307275083 | 4.547723138  |
| H    | -2.393866986            | -1.960984247 | 2.356621018  |
| C    | 1.43481728              | 0.486765922  | 3.038294257  |
| H    | 4.063057732             | 1.188303756  | 3.233013385  |
| H    | -1.582173729            | -3.241512008 | 3.25623328   |
| H    | 3.285355082             | -1.475902032 | 3.48855007   |
| H    | 0.862879946             | 3.593690546  | 0.820211459  |
| C    | 2.604765927             | -2.332454021 | 3.565016739  |
| H    | -0.853926613            | 5.665098806  | -1.03692169  |
| C    | 3.699100901             | 1.252627369  | 2.209980613  |
| H    | 3.230511075             | -3.236576512 | 3.531358927  |
| C    | 2.366759911             | 0.933843919  | 1.94138395   |
| H    | 1.094000056             | 5.273093895  | 0.28079523   |
| H    | -1.572946319            | 4.112419916  | -0.557375552 |
| C    | 1.215585649             | 4.217397747  | -0.004437644 |
| C    | -0.923483698            | 4.598238187  | -1.297923748 |
| H    | 5.590001093             | 1.880859538  | 1.362446777  |
| C    | 1.6088021               | -2.392778072 | 2.384042775  |

|   |              |              |              |
|---|--------------|--------------|--------------|
| H | 2.290508743  | 4.025993059  | -0.096055381 |
| C | 4.546932272  | 1.638494199  | 1.1717846    |
| H | -1.438013386 | 4.529437228  | -2.263536069 |
| H | 0.43418171   | -3.965925349 | 3.388530981  |
| H | 3.031742759  | -1.393799565 | 1.021887532  |
| C | 0.486878521  | 3.973411031  | -1.350194197 |
| C | 0.883774996  | -3.754870133 | 2.41106456   |
| C | 2.446296996  | -2.31678599  | 1.086276037  |
| H | 3.159267567  | -3.154886293 | 1.095135937  |
| H | 1.560439136  | 5.730750751  | -2.022573279 |
| C | 4.01978838   | 1.70315137   | -0.12031707  |
| H | 0.110581623  | -3.827475155 | 1.640495067  |
| C | 2.678850945  | 1.392563663  | -0.343031677 |
| C | 1.332983994  | 4.723868367  | -2.405035917 |
| H | 2.294673934  | 4.229300084  | -2.592045657 |
| H | 1.624726016  | -4.545141463 | 2.220290114  |
| H | 4.64368045   | 1.991800384  | -0.963208748 |
| H | 1.846806468  | -2.410393339 | 0.179746885  |
| H | -2.434616404 | 2.42995065   | -2.776632799 |
| C | 2.073005514  | 1.464543677  | -1.71737449  |
| H | 0.823233336  | 4.851492445  | -3.36040198  |
| H | 2.712016204  | 2.043809211  | -2.396238397 |
| H | -2.173964477 | 0.688847524  | -2.567753164 |
| C | -1.952272758 | 1.544118926  | -3.211354297 |
| H | 1.997250713  | 0.444577142  | -2.116294135 |
| C | -0.43160655  | 1.743628109  | -3.399393915 |
| H | 0.167384964  | -0.375105303 | -3.244887822 |
| H | -2.417586166 | 1.36217202   | -4.19166732  |
| C | 0.187220436  | 0.447166482  | -3.962121129 |
| H | -0.723932253 | 3.780020059  | -4.215853882 |
| H | 0.850143113  | 3.053672231  | -4.631089241 |
| C | -0.211233641 | 2.842099741  | -4.456671709 |
| H | -0.389234134 | 0.135621634  | -4.844839197 |
| H | 1.223324852  | 0.606745427  | -4.28918717  |
| H | -0.631217845 | 2.485360682  | -5.40901611  |
| S | -0.537410293 | -2.603135125 | -1.112979517 |
| O | 0.454469329  | -3.587225888 | -1.56933912  |
| O | -1.322952576 | -2.907019648 | 0.098116391  |
| O | 0.042754627  | -1.178354175 | -1.138618893 |
| C | -1.823272037 | -2.572933129 | -2.46848966  |
| F | -2.7454495   | -1.621163897 | -2.239491404 |
| F | -1.259837825 | -2.340031043 | -3.666191176 |
| F | -2.439454469 | -3.760077889 | -2.512077947 |
| N | -2.261569627 | 0.116269551  | 0.3222717    |
| N | -3.395243952 | 0.042983002  | 0.433398719  |
| N | -1.122029718 | 2.274780337  | 1.579479064  |
| H | -2.140519907 | 2.171525427  | 1.53375032   |

|   |              |             |             |
|---|--------------|-------------|-------------|
| H | -0.912597668 | 3.209841216 | 1.230559055 |
| H | -0.887600513 | 2.28018887  | 2.574241073 |

---

**Supplementary Table 22 | Cartesian coordinate of XVI. Units are presented in Å.**

SCF energy (in toluene) = -1873.53202305 hartree

ZPE = 0.663820 hartree

---

| Atom | Coordinates (Angstroms) |              |              |
|------|-------------------------|--------------|--------------|
|      | X                       | Y            | Z            |
| Mo   | -0.138937183            | -1.752521887 | -0.401938545 |
| P    | -0.268631959            | 0.437173404  | 0.645550084  |
| N    | -2.153806962            | -1.847088081 | 0.499827701  |
| P    | -0.97716311             | -3.720799675 | -1.526405736 |
| N    | 1.755671092             | -1.778846737 | -1.033080221 |
| N    | 2.860932423             | -1.823845355 | -1.34436333  |
| H    | 1.526897614             | 2.583091887  | 3.399548615  |
| H    | 0.007052656             | 1.694390972  | 3.555140659  |
| C    | 0.652250271             | 2.218083616  | 2.837893334  |
| H    | 1.334791579             | -0.446009364 | 3.042018609  |
| H    | 0.110316317             | 3.096229922  | 2.477028892  |
| H    | 2.77887849              | 0.560766805  | 2.915616518  |
| C    | 1.940623863             | 0.143247874  | 2.337328673  |
| H    | 2.985716128             | 2.358167041  | 1.324906019  |
| C    | 1.128710373             | 1.291589145  | 1.700180493  |
| H    | -0.912676583            | -0.317253995 | 2.838911042  |
| H    | 2.355256147             | -0.521085106 | 1.57010795   |
| H    | -2.090017988            | 0.901120948  | 2.380040454  |
| C    | 2.085713242             | 2.059059911  | 0.765861402  |
| H    | -0.444871067            | 3.707213247  | 0.517020265  |
| H    | 2.410449836             | 1.437072707  | -0.078234687 |
| C    | -1.527384079            | 0.035885927  | 1.997026036  |
| H    | -3.887462327            | -0.575166497 | 3.133066699  |
| H    | 1.635360866             | 2.975044818  | 0.367039892  |
| H    | -1.907298411            | 3.051739184  | 1.286639039  |
| H    | -0.809151388            | -5.17012947  | 1.030405785  |
| C    | -1.382540497            | 3.172385175  | 0.329674714  |
| H    | 0.990420073             | -6.913749363 | -0.743116167 |
| C    | -3.681249611            | -1.227269524 | 2.286224777  |
| H    | -2.004717497            | 3.826028855  | -0.301670492 |
| C    | -2.489899708            | -1.05444621  | 1.57796369   |
| H    | -1.048086971            | -6.872604619 | 0.603519675  |
| H    | 1.343410259             | -5.197508317 | -0.440978663 |
| C    | -1.264958794            | -5.839789426 | 0.290427184  |
| C    | 0.808506644             | -5.889698941 | -1.104561735 |

---

|   |              |              |              |
|---|--------------|--------------|--------------|
| H | -5.509368682 | -2.378494488 | 2.471540156  |
| C | -1.162286109 | 1.8277227    | -0.385591771 |
| H | -2.35126798  | -5.700525138 | 0.346297106  |
| C | -4.585465681 | -2.223792539 | 1.9186769    |
| H | 1.268091286  | -5.802804934 | -2.095012425 |
| H | 0.623790599  | 2.501229368  | -1.502216446 |
| H | -3.208561572 | 1.13643358   | 0.081667194  |
| C | -0.707802786 | -5.604796641 | -1.131093868 |
| C | -0.36049628  | 2.05671729   | -1.684702362 |
| C | -2.54805126  | 1.272634365  | -0.783395697 |
| H | -3.039492639 | 1.983000018  | -1.465769227 |
| H | -1.281057666 | -7.622690738 | -1.704839153 |
| C | -4.273953926 | -2.999196756 | 0.797653387  |
| H | -0.202085835 | 1.113963107  | -2.224586996 |
| C | -3.089098084 | -2.781976185 | 0.099310009  |
| C | -1.393566227 | -6.595791993 | -2.087924103 |
| H | -2.469663856 | -6.402084432 | -2.188563692 |
| H | -0.91464293  | 2.737780862  | -2.349078219 |
| H | -4.96371883  | -3.76186834  | 0.441388733  |
| H | -2.468517826 | 0.307726321  | -1.298950876 |
| H | 0.560608448  | -4.986015339 | -4.004362483 |
| C | -2.826801929 | -3.503604663 | -1.198638988 |
| H | -0.947923046 | -6.575504919 | -3.088872503 |
| H | -3.413920572 | -4.429946897 | -1.25422156  |
| H | 1.289380457  | -3.492637516 | -3.364170199 |
| C | 0.469948318  | -3.893010008 | -3.973979058 |
| H | -3.192528576 | -2.860619136 | -2.012748682 |
| C | -0.905655841 | -3.443777592 | -3.443826558 |
| H | -0.204582107 | -1.406909671 | -2.993761805 |
| H | 0.608630237  | -3.529276099 | -5.003797872 |
| C | -0.995496958 | -1.905472841 | -3.582774737 |
| H | -1.978758246 | -5.171407428 | -4.301480748 |
| H | -3.024881471 | -3.783017086 | -3.957903623 |
| C | -2.022613045 | -4.077924389 | -4.294593117 |
| H | -0.841854039 | -1.610713131 | -4.632697857 |
| H | -1.973611348 | -1.512206918 | -3.276893632 |
| H | -1.922434554 | -3.741331046 | -5.338597824 |
| H | 1.220852771  | -2.295904308 | 2.034363338  |
| N | 0.549156108  | -2.823145325 | 1.473963122  |
| H | 0.999966307  | -3.705075772 | 1.227176976  |
| H | -0.24184852  | -3.051980654 | 2.081388699  |

---

**Supplementary Table 23 | Cartesian coordinate of XVII. Units are presented in Å.**

SCF energy (in toluene) = -3909.60899623 hartree

ZPE = 1.314194 hartree

---

| Atom | Coordinates (Angstroms) |              |              |
|------|-------------------------|--------------|--------------|
|      | X                       | Y            | Z            |
| Mo   | -2.615071018            | 0.048465227  | -0.107133721 |
| Mo   | 2.64334993              | -0.093101933 | -0.030091376 |
| P    | 3.259671686             | 2.060792396  | -1.170605418 |
| P    | -3.256994285            | -2.111725063 | -1.245982266 |
| N    | -4.848854948            | 0.138013293  | -0.057795965 |
| N    | 4.859755984             | -0.208053674 | -0.068351916 |
| P    | 3.060084175             | -2.296079687 | 1.154199534  |
| P    | -3.028481872            | 2.255828683  | 1.079411288  |
| N    | -0.539082574            | -0.00448716  | -0.113389541 |
| N    | 0.618324799             | -0.026432017 | -0.072525259 |
| N    | -2.565028023            | 1.485514588  | -2.929041299 |
| N    | -2.587053814            | 0.959030902  | -1.918782154 |
| N    | -2.596442958            | -0.869321355 | 1.707510494  |
| N    | -2.590413874            | -1.401465744 | 2.712856535  |
| N    | 2.715804552             | 0.779442891  | 1.73831046   |
| N    | 2.77917287              | 1.291959135  | 2.764130509  |
| H    | 2.670606158             | 3.749263408  | -4.664837062 |
| H    | -2.737857574            | -3.711293722 | -4.781217592 |
| H    | -4.085748856            | -2.702106807 | -4.250865532 |
| H    | 4.043696947             | 2.747822903  | -4.184514789 |
| C    | 3.279316298             | 3.436678064  | -3.801938873 |
| C    | -3.327489908            | -3.413167759 | -3.900310992 |
| H    | -2.399561399            | -0.832724694 | -3.902311361 |
| H    | 2.385501748             | 0.865280448  | -3.877816529 |
| H    | -3.84119839             | -4.30718857  | -3.536990595 |
| H    | 3.787036636             | 4.327839965  | -3.425304685 |
| H    | -1.118420929            | -1.943914069 | -4.403353488 |
| H    | 1.079703626             | 1.964532097  | -4.314091537 |
| C    | 1.664322539             | 1.583219432  | -3.463743567 |
| C    | -1.689152749            | -1.579770873 | -3.534652487 |
| H    | 0.614309032             | 3.975498868  | -3.195610198 |
| H    | -0.658395934            | -3.994999368 | -3.353705421 |
| C    | 2.362274968             | 2.763386251  | -2.758652014 |
| C    | -2.383590862            | -2.777977946 | -2.857151972 |
| H    | -4.564392543            | -0.825375709 | -2.802508271 |
| H    | 4.548282695             | 0.842455244  | -2.807809054 |
| H    | 0.97485274              | 1.061734101  | -2.79150284  |
| H    | -1.001399715            | -1.069906091 | -2.850125179 |
| H    | 5.545307983             | 2.199153991  | -2.297131279 |

|   |              |              |              |
|---|--------------|--------------|--------------|
| H | -5.55690529  | -2.213603769 | -2.341505384 |
| C | 1.250410019  | 3.741287779  | -2.328831806 |
| C | -1.279923356 | -3.782624363 | -2.470261575 |
| H | 3.64713027   | 5.277220248  | -1.557106387 |
| H | -3.672779631 | -5.30895293  | -1.681075153 |
| H | 0.60581025   | 3.302521092  | -1.556855597 |
| H | -0.623951697 | -3.378523885 | -1.687496956 |
| C | 4.873572269  | 1.413828583  | -1.925001941 |
| C | -4.880992843 | -1.442537661 | -1.948938477 |
| H | 7.546201341  | 1.039736     | -1.728260567 |
| H | -7.556705234 | -1.117784467 | -1.665611154 |
| H | 1.645942677  | 4.689555988  | -1.951107198 |
| H | -1.678486963 | -4.740239958 | -2.120155646 |
| H | 5.228644144  | 4.467560491  | -1.636418974 |
| H | -5.251030671 | -4.490685893 | -1.687062983 |
| H | -4.495205052 | 2.574187776  | -1.462595771 |
| H | 4.467199025  | -2.627259757 | -1.371215465 |
| C | 4.416138753  | 4.771745561  | -0.963463104 |
| C | -4.418269425 | -4.814581761 | -1.049310373 |
| H | -2.641680416 | 5.136582727  | -1.425955411 |
| H | 2.66629935   | -5.189537974 | -1.350287028 |
| C | 7.004360979  | 0.45012711   | -0.991290275 |
| C | -7.001158541 | -0.533092973 | -0.935530757 |
| H | 4.834036012  | 5.521979406  | -0.274535866 |
| H | -4.816258872 | -5.578773594 | -0.36401783  |
| C | 5.610814165  | 0.514012537  | -0.965938373 |
| C | -5.606112714 | -0.578733347 | -0.948112745 |
| H | -4.881990735 | 4.299397294  | -1.556954777 |
| H | 4.827749733  | -4.365033394 | -1.52505583  |
| H | -2.023140271 | 3.479813303  | -1.494492596 |
| H | 1.808715149  | -3.645894121 | -1.147344948 |
| C | -4.702292933 | 3.463805805  | -0.863559562 |
| C | 4.679129653  | -3.542227404 | -0.808950839 |
| C | -2.336873086 | 4.274545507  | -0.812491113 |
| C | 2.33815956   | -4.442212517 | -0.61142559  |
| H | -8.752980667 | 0.29211965   | 0.034265933  |
| H | 8.774024357  | -0.408095093 | -0.079749999 |
| C | 3.863181995  | 3.594325974  | -0.136273297 |
| C | -3.831788581 | -3.656983879 | -0.216739127 |
| H | -5.632261412 | 3.296094749  | -0.30804012  |
| H | 5.633292231  | -3.378724948 | -0.296493258 |
| C | -7.666225046 | 0.248699129  | 0.008825547  |
| C | 7.687807868  | -0.350480253 | -0.075374554 |
| H | -1.468556189 | 4.582934077  | -0.222778084 |
| H | 1.597537961  | -4.925641806 | 0.032273278  |
| H | 1.861143167  | 4.48440967   | 0.158117612  |
| H | -1.832176254 | -4.576689176 | -0.001339418 |
| H | 5.909662007  | 2.858096505  | 0.242069736  |
| H | -5.868936571 | -2.943332544 | 0.238983814  |
| C | -3.528073702 | 3.838632123  | 0.068438391  |
| C | 3.556008635  | -3.921661089 | 0.185023363  |
| C | 2.699937147  | 4.09738419   | 0.745393674  |

|   |              |              |             |
|---|--------------|--------------|-------------|
| C | -2.645121131 | -4.186096113 | 0.618447239 |
| C | 5.002074211  | 3.123946303  | 0.796981831 |
| C | -4.93895794  | -3.198997468 | 0.759848304 |
| H | 5.262662981  | 3.953378626  | 1.471863155 |
| H | -5.165585265 | -4.028525283 | 1.44647694  |
| H | -4.3593475   | 5.828036895  | 0.245926563 |
| H | 4.454159247  | -5.887364223 | 0.381811914 |
| C | 6.931171863  | -1.063329949 | 0.857312054 |
| C | -6.897633607 | 0.972896396  | 0.91990406  |
| H | 2.326760218  | 3.311864474  | 1.407309944 |
| H | -2.233025277 | -3.416168523 | 1.276028122 |
| C | 5.539195403  | -0.979569453 | 0.846273711 |
| C | -5.504065298 | 0.908389742  | 0.868039249 |
| C | -3.990477814 | 5.03850437   | 0.918651409 |
| C | 4.102310215  | -5.079762475 | 1.043545277 |
| H | -4.816077471 | 4.780323887  | 1.594719976 |
| H | 4.958188929  | -4.773264368 | 1.658226266 |
| H | 3.062932514  | 4.921240577  | 1.379521644 |
| H | -2.99629284  | -5.012288003 | 1.255653381 |
| H | -7.37007062  | 1.597483945  | 1.675003459 |
| H | 7.415333889  | -1.689224079 | 1.604326286 |
| H | 4.711343583  | 2.273396972  | 1.416794934 |
| H | -4.638415615 | -2.341214881 | 1.36544488  |
| H | -1.208964972 | 4.742080608  | 1.886608845 |
| H | 1.362694904  | -4.846277118 | 2.116308427 |
| C | -4.669095165 | 1.704467815  | 1.839642859 |
| C | 4.723283345  | -1.743905491 | 1.858323598 |
| H | -3.181889032 | 5.475293127  | 1.51357181  |
| H | 3.343922176  | -5.513172287 | 1.70335908  |
| H | -5.264286551 | 2.523285936  | 2.264475019 |
| H | 5.323612987  | -2.553467943 | 2.293961752 |
| H | -0.273171342 | 3.298243018  | 1.425881901 |
| H | 0.353218061  | -3.478371137 | 1.58291911  |
| C | -0.874641242 | 3.754146385  | 2.221814894 |
| C | 0.98646355   | -3.855826686 | 2.395722857 |
| H | -4.367905454 | 1.057400696  | 2.676609116 |
| H | 4.445047306  | -1.066903291 | 2.679065524 |
| C | -2.038760074 | 2.838627768  | 2.649291162 |
| C | 2.110672392  | -2.864043749 | 2.757275212 |
| H | -0.772967134 | 1.042408053  | 2.599574723 |
| H | 0.768830988  | -1.128678299 | 2.640573478 |
| H | -0.208856174 | 3.909074499  | 3.083107638 |
| H | 0.338453532  | -3.992051299 | 3.273814817 |
| C | -1.41632173  | 1.586253612  | 3.298166725 |
| C | 1.437495132  | -1.614096566 | 3.358707048 |
| H | -3.360625284 | 4.468144251  | 3.36973786  |
| H | 3.531671172  | -4.389183268 | 3.517496799 |
| H | -3.684813948 | 2.889821525  | 4.111996143 |
| H | 3.765527246  | -2.770431755 | 4.205862028 |
| C | -2.894891821 | 3.543964524  | 3.721987946 |
| C | 3.013761797  | -3.482740573 | 3.844784283 |
| H | -0.796388785 | 1.902386529  | 4.150295144 |



|   |              |              |              |
|---|--------------|--------------|--------------|
| H | 0.839544574  | -1.921137468 | 4.230341363  |
| H | -2.171326047 | 0.892396465  | 3.681967469  |
| H | 2.161604027  | -0.867715873 | 3.698283634  |
| H | -2.248844647 | 3.806043097  | 4.573732743  |
| H | 2.39108964   | -3.755957265 | 4.710517817  |
| N | 2.431015879  | -1.197238412 | -2.134082584 |
| H | 2.636854754  | -2.193617533 | -2.088620738 |
| H | 2.973660841  | -0.828016373 | -2.915339023 |
| H | 1.448015151  | -1.113562321 | -2.400858067 |

---

**Supplementary Table 24 | Cartesian coordinate of XVIII. Units are presented in Å.**

SCF energy (in toluene) = -3853.04790381 hartree

ZPE = 1.273448 hartree

---

| Atom | Coordinates (Angstroms) |              |              |
|------|-------------------------|--------------|--------------|
|      | X                       | Y            | Z            |
| Mo   | -2.562034206            | 0.030977988  | -0.006149736 |
| Mo   | 2.674593022             | -0.228681369 | -0.238041528 |
| P    | 3.181279597             | 1.820472758  | -1.522609474 |
| P    | -3.133965873            | -1.954366333 | -1.497529218 |
| N    | -4.796945202            | 0.121279208  | -0.0581995   |
| N    | 4.920084413             | -0.281036126 | -0.278739324 |
| P    | 3.111200153             | -2.066975571 | 1.338869504  |
| P    | -3.03903636             | 2.046858694  | 1.459635426  |
| N    | -0.499927308            | -0.059403703 | -0.024084473 |
| N    | 0.655918576             | -0.116024817 | -0.103156886 |
| N    | -2.477766836            | 1.857854676  | -2.593965847 |
| N    | -2.495189973            | 1.195493906  | -1.66892309  |
| N    | -2.646458056            | -1.139463827 | 1.650471637  |
| N    | -2.719601641            | -1.806876582 | 2.569989335  |
| N    | 2.664683627             | -2.010707006 | -2.762065512 |
| N    | 2.672045774             | -1.339543785 | -1.830061928 |
| H    | 2.582679774             | 3.382708752  | -5.043390273 |
| H    | -2.448621458            | -3.024624839 | -5.185622197 |
| H    | -3.826053538            | -2.100005635 | -4.580376097 |
| H    | 4.032852646             | 2.546656128  | -4.482711941 |
| C    | 3.178634245             | 3.148273652  | -4.147950293 |
| C    | -3.08067144             | -2.855451188 | -4.300681927 |
| H    | -2.1825315              | -0.303763754 | -3.895943189 |
| H    | 2.610309078             | 0.418526515  | -4.106146486 |
| H    | -3.60520792             | -3.791166945 | -4.091155671 |
| H    | 3.561676623             | 4.094737883  | -3.75542262  |
| H    | -0.854477243            | -1.319415328 | -4.476554727 |
| H    | 1.255854903             | 1.362892373  | -4.748924296 |
| C    | 1.793676185             | 1.094833707  | -3.826941732 |
| C    | -1.476938735            | -1.087230596 | -3.599936845 |
| H    | 0.440761704             | 3.379447555  | -3.691535299 |
| H    | -0.421447652            | -3.493461989 | -3.722768151 |
| C    | 2.290101317             | 2.385444637  | -3.14373915  |
| C    | -2.184265718            | -2.375968846 | -3.139163671 |
| H    | -4.373713512            | -0.442997444 | -2.900498717 |
| H    | 4.582674913             | 0.67322177   | -3.088745097 |
| H    | 1.111316726             | 0.535780541  | -3.180458628 |
| H    | -0.825402141            | -0.684482407 | -2.818834695 |
| H    | 5.484612331             | 2.094803442  | -2.560220254 |

---

|   |              |              |              |
|---|--------------|--------------|--------------|
| H | -5.378006029 | -1.879117538 | -2.686916239 |
| C | 1.053641227  | 3.234756203  | -2.789896297 |
| C | -1.086156023 | -3.420293738 | -2.850282698 |
| H | 3.292287046  | 5.050752624  | -1.858078279 |
| H | -3.499530323 | -5.052622466 | -2.388233404 |
| H | 0.421889432  | 2.73564872   | -2.045022975 |
| H | -0.463246929 | -3.127384081 | -1.996125964 |
| C | 4.848305161  | 1.272420146  | -2.205374625 |
| C | -4.722866546 | -1.174980397 | -2.158028922 |
| H | 7.505747658  | 0.870134497  | -2.150836826 |
| H | -7.408225449 | -0.875577296 | -1.974154691 |
| H | 1.319544856  | 4.229739459  | -2.413306815 |
| H | -1.490208567 | -4.420768794 | -2.661001676 |
| H | 4.946240453  | 4.400890802  | -1.859016823 |
| H | -5.077853828 | -4.234320118 | -2.384448478 |
| H | -4.369769965 | 2.811171634  | -1.105530047 |
| H | 4.153280567  | -3.378625977 | -1.064415006 |
| C | 4.076858096  | 4.621143546  | -1.225662812 |
| C | -4.288148511 | -4.649899922 | -1.745281945 |
| H | -2.482930938 | 5.217840729  | -0.619359602 |
| H | 1.862124104  | -5.332537165 | -0.179346409 |
| C | 7.006412881  | 0.307610667  | -1.364586486 |
| C | -6.894389079 | -0.402905396 | -1.140007966 |
| H | 4.382756223  | 5.402124647  | -0.512064346 |
| H | -4.725514469 | -5.498865222 | -1.19802921  |
| C | 5.619226613  | 0.402947568  | -1.243057798 |
| C | -5.500369599 | -0.458600851 | -1.081163447 |
| H | -4.757505595 | 4.522478543  | -0.889614153 |
| H | 4.274311986  | -5.090251972 | -0.623462007 |
| H | -1.852402127 | 3.574672425  | -0.817955059 |
| H | 1.644837824  | -3.653478433 | -0.715848735 |
| C | -4.59936922  | 3.572642247  | -0.357106251 |
| C | 4.291117801  | -4.065134713 | -0.223334481 |
| C | -2.216377894 | 4.295367547  | -0.081101475 |
| C | 1.829095943  | -4.285456304 | 0.159283606  |
| H | -8.697543043 | 0.294958582  | -0.165826747 |
| H | 8.813174538  | -0.606275838 | -0.592583059 |
| C | 3.596519219  | 3.381154615  | -0.450646934 |
| C | -3.758318954 | -3.622811367 | -0.725314537 |
| H | -5.547263671 | 3.307726455  | 0.125759258  |
| H | 5.2886901    | -3.898216465 | 0.202056639  |
| C | -7.611065149 | 0.246924308  | -0.135873049 |
| C | 7.733657004  | -0.509112466 | -0.499542441 |
| H | -1.390319374 | 4.538017266  | 0.594861514  |
| H | 0.977337473  | -4.184751247 | 0.841656204  |
| H | 1.50710575   | 4.07340421   | -0.238095301 |
| H | -1.767855439 | -4.565400333 | -0.542304391 |
| H | 5.664768671  | 2.773266168  | 0.033241815  |
| H | -5.823525812 | -2.983992279 | -0.292297237 |
| C | -3.460482441 | 3.771097169  | 0.669310693  |
| C | 3.170570452  | -3.925376001 | 0.831879741  |
| C | 2.346325348  | 3.741303606  | 0.381732658  |

|   |              |              |             |
|---|--------------|--------------|-------------|
| C | -2.611635536 | -4.266416858 | 0.08674989  |
| C | 4.712041467  | 2.974864708  | 0.537195516 |
| C | -4.922118248 | -3.306647919 | 0.241810413 |
| H | 4.88086382   | 3.796182254  | 1.250188312 |
| H | -5.179345064 | -4.224021511 | 0.792595266 |
| H | -4.246112227 | 5.740713637  | 1.097690328 |
| H | 3.584269373  | -5.921086336 | 1.566271511 |
| C | 7.031729521  | -1.188629483 | 0.495949042 |
| C | -6.89603104  | 0.833769649  | 0.9075279   |
| H | 2.000345697  | 2.884415108  | 0.975823771 |
| H | -2.234590942 | -3.597237872 | 0.864794288 |
| C | 5.648206861  | -1.046321148 | 0.599513429 |
| C | -5.501693512 | 0.764880155  | 0.924634857 |
| C | -3.939203388 | 4.847819034  | 1.663653552 |
| C | 3.455387867  | -4.909251375 | 1.980601941 |
| H | -4.810785776 | 4.521391844  | 2.245808264 |
| H | 4.376018756  | -4.661829999 | 2.525418523 |
| H | 2.590150758  | 4.557174787  | 1.079566625 |
| H | -2.990253951 | -5.173246196 | 0.582981459 |
| H | -7.410708502 | 1.35290664   | 1.713120864 |
| H | 7.552394821  | -1.819747319 | 1.21315523  |
| H | 4.442763362  | 2.078766616  | 1.111036943 |
| H | -4.667110267 | -2.540135546 | 0.977049395 |
| H | -1.24205839  | 4.353951294  | 2.725602495 |
| H | 0.883707914  | -3.546695968 | 3.01620785  |
| C | -4.722326846 | 1.415362469  | 2.040312191 |
| C | 4.91179582   | -1.678084832 | 1.752189728 |
| H | -3.156338918 | 5.163257298  | 2.360479787 |
| H | 2.631789002  | -4.957441405 | 2.701956393 |
| H | -5.340092931 | 2.175207209  | 2.536351219 |
| H | 5.474514933  | -2.534318142 | 2.147055778 |
| H | -0.303890602 | 2.968234821  | 2.127626294 |
| H | 0.304436282  | -2.085477714 | 2.186007268 |
| C | -0.947848184 | 3.321807683  | 2.94322607  |
| C | 0.875515414  | -2.450580418 | 3.047665998 |
| H | -4.474521182 | 0.658712644  | 2.799033797 |
| H | 4.865373555  | -0.9388189   | 2.566323646 |
| C | -2.152073856 | 2.382997181  | 3.160509815 |
| C | 2.298991614  | -1.862054009 | 3.080265886 |
| H | -0.936484141 | 0.570141058  | 2.917521243 |
| H | 1.578625389  | 0.129256885  | 2.489336961 |
| H | -0.339294301 | 3.345362333  | 3.859815285 |
| H | 0.327950899  | -2.155702592 | 3.955087277 |
| C | -1.592284817 | 1.036654599  | 3.659241047 |
| C | 2.183365088  | -0.333071243 | 3.281138216 |
| H | -3.496456122 | 3.91794627   | 4.034751795 |
| H | 3.162736642  | -3.536776464 | 4.23442205  |
| H | -3.886860604 | 2.253966218  | 4.507758967 |
| H | 4.095417104  | -2.033645744 | 4.350122241 |
| C | -3.065637452 | 2.942216219  | 4.271848932 |
| C | 3.081356239  | -2.446707046 | 4.273377423 |
| H | -1.008908453 | 1.213901949  | 4.575801552 |

|   |              |              |             |
|---|--------------|--------------|-------------|
| H | 1.689731212  | -0.120574025 | 4.241509963 |
| H | -2.380928914 | 0.319936328  | 3.910427325 |
| H | 3.163551972  | 0.164132583  | 3.304690655 |
| H | -2.47305567  | 3.060686925  | 5.192039808 |
| H | 2.558421211  | -2.191713211 | 5.208132432 |

---

**Supplementary Table 25 | Cartesian coordinate of XIX. Units are presented in Å.**

SCF energy (in toluene) = -1926.49168292 hartree

ZPE = 0.636867 hartree

---

| Atom | Coordinates (Angstroms) |              |              |
|------|-------------------------|--------------|--------------|
|      | X                       | Y            | Z            |
| Mo   | -2.710355514            | -0.010499466 | -0.00026362  |
| P    | -3.176757357            | 2.166886364  | 1.162682403  |
| N    | -4.8657873              | -0.019120168 | -0.000685088 |
| P    | -3.159000725            | -2.191597472 | -1.164680654 |
| N    | -2.523750295            | -1.460698013 | 2.804388677  |
| N    | -2.612751224            | -0.922188471 | 1.802535277  |
| N    | -2.617934544            | 0.901819174  | -1.802945522 |
| N    | -2.531898127            | 1.440739355  | -2.804842053 |
| H    | -2.505526961            | 3.733237914  | 4.681119516  |
| H    | -3.889101192            | 2.752011255  | 4.194297878  |
| C    | -3.12765102             | 3.446950467  | 3.819125764  |
| H    | -2.271231142            | 0.837921248  | 3.771264127  |
| H    | -3.633920982            | 4.350900708  | 3.469867974  |
| H    | -0.947398821            | 1.908455319  | 4.250811946  |
| C    | -1.550741423            | 1.57032626   | 3.39457229   |
| H    | -0.464693686            | 3.958422477  | 3.21805025   |
| C    | -2.229373517            | 2.793951202  | 2.74755613   |
| H    | -4.484121327            | 0.918543104  | 2.746460515  |
| H    | -0.885355729            | 1.055231298  | 2.691648757  |
| H    | -5.451500265            | 2.336579151  | 2.320536768  |
| C    | -1.107507473            | 3.772528465  | 2.344813988  |
| H    | -3.473770083            | 5.372498092  | 1.614986764  |

|   |              |              |              |
|---|--------------|--------------|--------------|
| H | -0.471365409 | 3.359037459  | 1.550701867  |
| C | -4.80610366  | 1.550808618  | 1.90604522   |
| H | -7.490224229 | 1.318663234  | 1.678437978  |
| H | -1.487103803 | 4.743542979  | 2.010890417  |
| H | -5.079287841 | 4.610333132  | 1.644050261  |
| H | -4.567031198 | -2.479780223 | 1.415232324  |
| C | -4.246159414 | 4.907401171  | 0.993596999  |
| H | -2.814203372 | -5.086930144 | 1.331196024  |
| C | -6.973898815 | 0.718991229  | 0.932019921  |
| H | -4.628001817 | 5.68782011   | 0.317613317  |
| C | -5.578396805 | 0.71750554   | 0.916163225  |
| H | -5.021889288 | -4.188728637 | 1.497327165  |
| H | -2.12265031  | -3.459283747 | 1.371690052  |
| C | -4.822829951 | -3.352563343 | 0.810197346  |
| C | -2.488341477 | -4.24359986  | 0.703208507  |
| H | -8.776665226 | -0.035404818 | -0.000643399 |
| C | -3.71295986  | 3.733847815  | 0.147881231  |
| H | -5.756548389 | -3.140413052 | 0.276719694  |
| C | -7.688892651 | -0.030822594 | -0.000703991 |
| H | -1.649148501 | -4.59537999  | 0.095940285  |
| H | -1.685636919 | 4.58446332   | -0.09710577  |
| H | -5.779866381 | 3.092075646  | -0.280337526 |
| C | -3.68366227  | -3.762852918 | -0.150092863 |
| C | -2.521017686 | 4.224212032  | -0.704681884 |
| C | -4.848376029 | 3.315162378  | -0.813275252 |
| H | -5.055792152 | 4.151476324  | -1.497736172 |
| H | -4.584392139 | -5.723383154 | -0.319550379 |
| C | -6.967689877 | -0.774547882 | -0.933524281 |
| H | -2.147467158 | 3.442355375  | -1.371700655 |
| C | -5.572250921 | -0.761388932 | -0.91769891  |

|   |              |              |              |
|---|--------------|--------------|--------------|
| C | -4.207235611 | -4.940802606 | -0.995650521 |
| H | -5.041496099 | -4.650211856 | -1.647581789 |
| H | -2.853771953 | 5.063735337  | -1.334140504 |
| H | -7.47899307  | -1.378463222 | -1.679982107 |
| H | -4.584088201 | 2.44692935   | -1.421236657 |
| H | -1.448027874 | -4.754207834 | -2.013124364 |
| C | -4.79301649  | -1.587876592 | -1.907915466 |
| H | -3.430556418 | -5.400769563 | -1.615496241 |
| H | -5.431889939 | -2.378695898 | -2.322870017 |
| H | -0.444117025 | -3.360960876 | -1.553236321 |
| C | -1.07684293  | -3.779965414 | -2.347184382 |
| H | -4.476023204 | -0.9524521   | -2.747846258 |
| C | -2.207104069 | -2.811051265 | -2.749725667 |
| H | -0.878135376 | -1.060907385 | -2.694540012 |
| H | -0.432746536 | -3.960275434 | -3.220628454 |
| C | -1.539308908 | -1.58172858  | -3.397210187 |
| H | -3.598725454 | -4.379951624 | -3.470449678 |
| H | -3.86808666  | -2.783729598 | -4.195463936 |
| C | -3.100424096 | -3.471942732 | -3.820549121 |
| H | -0.93345711  | -1.914690094 | -4.253708004 |
| H | -2.266257698 | -0.855541253 | -3.773558624 |
| H | -2.47648974  | -3.753225505 | -4.682885984 |

-----



**Supplementary Table 26 | Cartesian coordinate of XIX'. Units are presented in Å.**

SCF energy (in toluene) = -1926.51501551 hartree

ZPE = 0.635509 hartree

---

| Atom | Coordinates (Angstroms) |              |              |
|------|-------------------------|--------------|--------------|
|      | X                       | Y            | Z            |
| Mo   | -2.823392577            | -0.297373761 | -0.117155257 |
| P    | -2.959511308            | 1.956761547  | 0.86075548   |
| N    | -5.001449443            | -0.213743216 | 0.428289921  |
| P    | -3.620596518            | -2.327617328 | -1.232000062 |
| N    | -2.297791738            | -1.631859269 | 2.62445636   |
| N    | -2.471778093            | -1.131754545 | 1.608633977  |
| N    | -0.881421448            | -0.369678098 | -0.642125623 |
| N    | 0.213264266             | -0.405531562 | -0.962860586 |
| H    | -1.514545657            | 4.025236012  | 3.826078923  |
| H    | -3.04726976             | 3.150071315  | 3.78539391   |
| C    | -2.309298209            | 3.662899398  | 3.156267944  |
| H    | -1.776654846            | 0.922657469  | 3.398079498  |
| H    | -2.790572459            | 4.541307665  | 2.71518575   |
| H    | -0.310969982            | 1.90265722   | 3.566438366  |
| C    | -1.047424783            | 1.522976041  | 2.841975403  |
| H    | 0.235636256             | 3.709096655  | 2.038523457  |
| C    | -1.689812456            | 2.718119032  | 2.106525937  |
| H    | -3.9936812              | 1.173757488  | 2.875788499  |
| H    | -0.532564386            | 0.852689564  | 2.145562331  |
| H    | -4.962365231            | 2.540346148  | 2.323443024  |
| C    | -0.571718268            | 3.449431446  | 1.337761425  |
| H    | -2.930942395            | 5.190956471  | 0.649498483  |
| H    | -0.136908071            | 2.815008099  | 0.554984814  |
| C    | -4.441065031            | 1.634808992  | 1.982937003  |
| H    | -7.052223231            | 1.37739734   | 2.607869315  |
| H    | -0.915333769            | 4.38343806   | 0.878438011  |
| H    | -4.561890225            | 4.653272354  | 1.105056503  |
| H    | -4.043972741            | -3.240937205 | 1.508906791  |
| C    | -3.843194261            | 4.71280073   | 0.277066644  |
| H    | -2.004155088            | -5.338663046 | 0.437054946  |
| C    | -6.756055073            | 0.664761356  | 1.841283974  |
| H    | -4.275282849            | 5.384198327  | -0.481159943 |
| C    | -5.434191583            | 0.662599685  | 1.388597937  |
| H    | -4.241407956            | -4.995637652 | 1.372556632  |
| H    | -1.670190398            | -3.600697082 | 0.591040264  |
| C    | -4.368143649            | -4.042515474 | 0.837801687  |
| C    | -2.063568287            | -4.370115043 | -0.082131025 |
| H    | -8.700720535            | -0.270772741 | 1.679318847  |
| C    | -3.571017091            | 3.335898799  | -0.354445777 |

|   |              |              |              |
|---|--------------|--------------|--------------|
| H | -5.441178464 | -3.919939414 | 0.642421726  |
| C | -7.672216697 | -0.249569364 | 1.324958935  |
| H | -1.406772722 | -4.425230489 | -0.957936189 |
| H | -1.572165752 | 3.874242941  | -1.134482668 |
| H | -5.706311589 | 2.768402853  | -0.268611932 |
| C | -3.53315967  | -4.087169167 | -0.462597865 |
| C | -2.529532934 | 3.477196743  | -1.486555003 |
| C | -4.885526115 | 2.83529198   | -0.99254541  |
| H | -5.195291546 | 3.538530145  | -1.780226176 |
| H | -4.072977813 | -6.161346717 | -0.778643566 |
| C | -7.237618948 | -1.129922645 | 0.335005598  |
| H | -2.329171165 | 2.510992691  | -1.969088033 |
| C | -5.915076396 | -1.081749166 | -0.108900588 |
| C | -4.069185409 | -5.222203431 | -1.352774514 |
| H | -5.099708069 | -5.041687556 | -1.686701954 |
| H | -2.912172052 | 4.164955662  | -2.255861911 |
| H | -7.922052587 | -1.847199052 | -0.112367131 |
| H | -4.766743919 | 1.846543749  | -1.454285425 |
| H | -1.805573566 | -4.051389262 | -3.134654351 |
| C | -5.474332064 | -1.947953707 | -1.264040273 |
| H | -3.444445799 | -5.386996842 | -2.238078596 |
| H | -6.109475832 | -2.840271384 | -1.339624317 |
| H | -1.075412889 | -2.488898823 | -2.699896615 |
| C | -1.826201316 | -2.973704507 | -3.335881683 |
| H | -5.639227496 | -1.378287781 | -2.190699586 |
| C | -3.229608947 | -2.372114328 | -3.122205721 |
| H | -2.4163292   | -0.333845827 | -2.978460214 |
| H | -1.5203477   | -2.831908202 | -4.383430411 |
| C | -3.181710955 | -0.884923524 | -3.544389498 |
| H | -4.315009819 | -4.171907105 | -3.796486672 |
| H | -5.260735605 | -2.678514218 | -3.930352826 |
| C | -4.251622817 | -3.102045487 | -4.015752133 |
| H | -2.918497685 | -0.807095824 | -4.610139746 |
| H | -4.148427002 | -0.378057884 | -3.41487108  |
| H | -3.949673803 | -3.001264587 | -5.069695012 |

---

**Supplementary Table 27 | Cartesian coordinate of XX. Units are presented in Å.**

SCF energy (in toluene) = -1983.07761485 hartree

ZPE = 0.675588 hartree

---

| Atom | Coordinates (Angstroms) |              |              |
|------|-------------------------|--------------|--------------|
|      | X                       | Y            | Z            |
| Mo   | -0.152898577            | -1.480244295 | -0.773851492 |
| P    | -0.293363018            | 0.56371018   | 0.679897559  |
| N    | -2.117150883            | -1.775287798 | 0.22775867   |
| P    | -0.926135757            | -3.642730945 | -1.828355833 |
| N    | 1.667860116             | -1.272300771 | -1.592632524 |
| N    | 2.738927203             | -1.206767523 | -1.989093174 |
| H    | 1.696616676             | 2.144426273  | 3.671088457  |
| H    | 0.271251533             | 1.103765114  | 3.761007759  |
| C    | 0.784678227             | 1.842951393  | 3.132206875  |
| H    | 1.728491836             | -0.643515682 | 2.724657716  |
| H    | 0.145727289             | 2.725057384  | 3.058213011  |
| H    | 3.056027236             | 0.491711701  | 2.532730438  |
| C    | 2.158336491             | 0.097420811  | 2.033832068  |
| H    | 2.895703519             | 2.556589541  | 1.463458821  |
| C    | 1.18009505              | 1.257351935  | 1.760305656  |
| H    | -0.667202549            | -0.845217785 | 2.612024423  |
| H    | 2.476097891             | -0.396447933 | 1.1091428    |
| H    | -1.844887202            | 0.463070274  | 2.707063875  |
| C    | 1.959864093             | 2.3073353    | 0.940749836  |
| H    | -0.599790581            | 3.74060149   | 1.400602016  |
| H    | 2.225718287             | 1.926362877  | -0.053935936 |
| C    | -1.37345518             | -0.247158259 | 2.014677089  |
| H    | -3.841790757            | -0.816775823 | 2.986477192  |
| H    | 1.403599868             | 3.241334999  | 0.813939862  |
| H    | -1.933357318            | 2.823497835  | 2.140181792  |
| H    | -1.136567655            | -4.278406005 | 1.024912104  |
| C    | -1.53130542             | 3.204257666  | 1.191862223  |
| H    | 0.697792331             | -6.648862888 | -0.047226735 |
| C    | -3.652027215            | -1.326891287 | 2.044419224  |
| H    | -2.249915026            | 3.946268585  | 0.811680557  |
| C    | -2.419747256            | -1.152018667 | 1.411248456  |
| H    | -1.251759196            | -6.050849571 | 1.125822998  |
| H    | 1.247300985             | -4.977023624 | -0.271307832 |
| C    | -1.481963771            | -5.175253961 | 0.500015394  |
| C    | 0.638007848             | -5.773495083 | -0.712127733 |
| H    | -5.590776107            | -2.286033364 | 1.944703891  |
| C    | -1.363588911            | 2.095247588  | 0.133219231  |
| H    | -2.57315677             | -5.096883898 | 0.437680468  |
| C    | -4.624803442            | -2.141367572 | 1.465493314  |

|   |              |              |              |
|---|--------------|--------------|--------------|
| H | 1.113954922  | -6.049203497 | -1.657566982 |
| H | 0.247808946  | 3.133159603  | -0.970320685 |
| H | -3.330537282 | 1.262791036  | 0.684592354  |
| C | -0.839976557 | -5.360656901 | -0.895666896 |
| C | -0.746628536 | 2.709450582  | -1.143749415 |
| C | -2.784249285 | 1.589544878  | -0.208414267 |
| H | -3.351607015 | 2.422626609  | -0.649966662 |
| H | -1.568073827 | -7.404029374 | -0.892476724 |
| C | -4.328676845 | -2.756156846 | 0.24825998   |
| H | -0.673340387 | 1.979553722  | -1.95366815  |
| C | -3.08213177  | -2.562324169 | -0.349369403 |
| C | -1.588881951 | -6.531235287 | -1.564220555 |
| H | -2.643648501 | -6.294388852 | -1.752242842 |
| H | -1.394747465 | 3.528487721  | -1.491741803 |
| H | -5.061990978 | -3.387347709 | -0.249033201 |
| H | -2.782377872 | 0.774086547  | -0.934133946 |
| H | 0.386013753  | -5.928818612 | -3.636530283 |
| C | -2.761630125 | -3.215768624 | -1.672427561 |
| H | -1.132904032 | -6.843124234 | -2.509103834 |
| H | -3.441722778 | -4.059634824 | -1.850784449 |
| H | 1.39651782   | -4.470378166 | -3.491309571 |
| C | 0.506730732  | -4.894219173 | -3.9749009   |
| H | -2.932098588 | -2.487185804 | -2.478181352 |
| C | -0.74458018  | -4.025749706 | -3.728369373 |
| H | 0.354968758  | -2.149394674 | -4.057467101 |
| H | 0.707994567  | -4.930278229 | -5.055744278 |
| C | -0.51355914  | -2.685049045 | -4.454234309 |
| H | -2.222552436 | -5.669006797 | -3.933766161 |
| H | -2.871539434 | -4.056661371 | -4.28733501  |
| C | -1.981745281 | -4.693504813 | -4.364707048 |
| H | -0.335868503 | -2.891266677 | -5.520845449 |
| H | -1.37593985  | -2.015810835 | -4.387517013 |
| H | -1.790743589 | -4.847083672 | -5.437823897 |
| H | 1.951926439  | -2.876479332 | 0.463522012  |
| N | 1.040804884  | -2.683171438 | 0.886691685  |
| H | 0.645497827  | -3.586270324 | 1.145833123  |
| H | 1.233799028  | -2.1872557   | 1.75545544   |
| N | -1.072707171 | -0.528709531 | -2.245503266 |
| N | -1.642862429 | 0.013915347  | -3.079168521 |

---

**Supplementary Table 28 | Cartesian coordinate of XXI. Units are presented in Å.**

SCF energy = -2035.41892234 hartree (BS1)

ZPE = 0.654866 hartree

---

| Atom | Coordinates (Angstroms) |              |              |
|------|-------------------------|--------------|--------------|
|      | X                       | Y            | Z            |
| Mo   | 2.253304433             | 1.763908953  | 1.595322264  |
| P    | 2.772655486             | -0.70658602  | 2.231955693  |
| N    | 4.449473132             | 1.570339988  | 1.08363936   |
| P    | 2.757593984             | 4.085394413  | 0.560093557  |
| N    | -0.889984676            | 2.121920524  | 2.035342973  |
| N    | 0.217937739             | 1.988401951  | 1.881983029  |
| N    | 2.652641221             | 2.802006608  | 4.43711244   |
| N    | 2.508855014             | 2.315256905  | 3.327044459  |
| N    | 1.630656224             | 1.032561112  | -0.385463841 |
| N    | 1.230547961             | 0.669679351  | -1.363482858 |
| H    | 2.632835199             | -2.792849247 | 5.495508699  |
| H    | 4.00783804              | -1.874833761 | 4.880940157  |
| C    | 3.098831868             | -2.408320364 | 4.577123275  |
| H    | 2.664290115             | 0.23176081   | 5.122513846  |
| H    | 3.392332569             | -3.272110277 | 3.977449064  |
| H    | 1.356528672             | -0.760517751 | 5.769003383  |
| C    | 1.764080142             | -0.329364679 | 4.844153204  |
| H    | 0.298256784             | -2.486113343 | 4.544970017  |
| C    | 2.088717389             | -1.47848684  | 3.8695263    |
| H    | 4.511173932             | 0.167765136  | 3.652431527  |
| H    | 1.015284289             | 0.358721611  | 4.43483356   |
| H    | 5.17579971              | -1.221817451 | 2.793596627  |
| C    | 0.77563096              | -2.237395471 | 3.58716655   |
| H    | 2.812254593             | -3.935723327 | 2.082984539  |
| H    | 0.062395003             | -1.633116151 | 3.011712556  |
| C    | 4.561263367             | -0.322352899 | 2.669402146  |
| H    | 7.167280755             | -0.255001621 | 1.936728632  |
| H    | 0.939662285             | -3.181375174 | 3.058103987  |
| H    | 4.457459499             | -3.286574869 | 1.893186522  |
| H    | 4.545469314             | 3.821589588  | 2.938723071  |
| C    | 3.487283676             | -3.414236411 | 1.39763748   |
| H    | 3.031980573             | 6.518929346  | 3.494108681  |
| C    | 6.585578339             | 0.509380284  | 1.428073501  |
| H    | 3.649052941             | -4.080765087 | 0.538619352  |
| C    | 5.217412394             | 0.618452275  | 1.688804695  |
| H    | 5.177333243             | 5.454973238  | 3.160020478  |
| H    | 2.240274802             | 4.941603069  | 3.432563169  |
| C    | 4.791309614             | 4.747370507  | 2.413261155  |
| C    | 2.548524184             | 5.795005041  | 2.822698269  |

---

|   |              |              |              |
|---|--------------|--------------|--------------|
| H | 8.251483271  | 1.306988624  | 0.30676734   |
| C | 2.899856182  | -2.084631627 | 0.87956114   |
| H | 5.605002945  | 4.549818647  | 1.705499437  |
| C | 7.187730218  | 1.379110487  | 0.522144411  |
| H | 1.65543538   | 6.277047085  | 2.415640703  |
| H | 0.834868895  | -2.85842376  | 0.992597209  |
| H | 4.881115711  | -1.512876794 | 0.094393233  |
| C | 3.564712643  | 5.391377626  | 1.730474865  |
| C | 1.502714518  | -2.366506974 | 0.280716558  |
| C | 3.83989899   | -1.580544929 | -0.240891594 |
| H | 3.813127008  | -2.303924407 | -1.067440029 |
| H | 4.605887416  | 7.278785672  | 1.708673216  |
| C | 6.399841129  | 2.341129207  | -0.103423533 |
| H | 1.000023564  | -1.464753751 | -0.077550223 |
| C | 5.036065404  | 2.420830112  | 0.19315459   |
| C | 4.052571047  | 6.65490776   | 0.992738362  |
| H | 4.738788064  | 6.427553701  | 0.167231669  |
| H | 1.616235597  | -3.042549738 | -0.578247621 |
| H | 6.831693393  | 3.034310164  | -0.82058407  |
| H | 3.5516981    | -0.608196112 | -0.649791392 |
| H | 1.114010324  | 6.791714956  | 0.411252579  |
| C | 4.179196682  | 3.452351936  | -0.501617032 |
| H | 3.231634303  | 7.265557677  | 0.604577944  |
| H | 4.808208047  | 4.264541907  | -0.884133545 |
| H | 0.092669396  | 5.388104146  | 0.799899074  |
| C | 0.631410531  | 5.902528902  | -0.006052401 |
| H | 3.702781253  | 2.989315157  | -1.379290995 |
| C | 1.622897099  | 4.96886757   | -0.732135908 |
| H | 0.167457021  | 3.316003315  | -0.777447504 |
| H | -0.117139759 | 6.251640751  | -0.730498274 |
| C | 0.796042625  | 3.893301654  | -1.463863204 |
| H | 3.022390752  | 6.562607116  | -1.387845103 |
| H | 3.053718289  | 5.10885359   | -2.405460905 |
| C | 2.409051489  | 5.759090193  | -1.801278505 |
| H | 0.129532244  | 4.393021441  | -2.180378668 |
| H | 1.421051598  | 3.203846655  | -2.042962316 |
| H | 1.688591307  | 6.220618182  | -2.491383069 |
| H | 2.206802864  | 2.273621368  | 5.205239783  |

---

**Supplementary Table 29 | Cartesian coordinate of XXII. Units are presented in Å.**

SCF energy (in toluene) = -2724.02957112 hartree

ZPE = 0.662558 hartree

---

| Atom | Coordinates (Angstroms) |              |              |
|------|-------------------------|--------------|--------------|
|      | X                       | Y            | Z            |
| Mo   | -0.486151315            | 0.056417154  | -0.130749294 |
| P    | -1.45945757             | -2.257989173 | 0.536902636  |
| N    | -2.046892262            | -0.219131363 | -1.729957396 |
| P    | -0.760522602            | 2.413786967  | -0.937488039 |
| N    | 0.9976722               | -0.296171455 | -0.917103535 |
| H    | -0.370321203            | -5.83904272  | -0.370268801 |
| H    | -2.00500484             | -5.171977535 | -0.33639149  |
| C    | -1.006336107            | -5.082038684 | 0.109586797  |
| H    | -1.12253424             | -3.610736726 | -2.199044246 |
| H    | -1.071858257            | -5.342079855 | 1.17037295   |
| H    | 0.499152454             | -4.282028222 | -2.011636692 |
| C    | -0.182239756            | -3.502584096 | -1.64347656  |
| H    | 1.65168359              | -4.418628213 | 0.147188815  |
| C    | -0.368690029            | -3.697571626 | -0.12322723  |
| H    | -3.228234012            | -3.247449981 | -0.92680791  |
| H    | 0.259675184             | -2.531277365 | -1.888830877 |
| H    | -3.786572549            | -1.876913215 | 0.007189718  |
| C    | 1.006509978             | -3.637649599 | 0.57357894   |
| H    | -3.077753604            | -4.69059879  | 1.718626582  |
| H    | 1.496066707             | -2.668773919 | 0.432497225  |
| C    | -2.947332636            | -2.237775571 | -0.604827019 |
| H    | -4.275878986            | -2.465826179 | -2.926371262 |
| H    | 0.937118984             | -3.812358196 | 1.651450262  |
| H    | -4.266508509            | -3.398325131 | 1.451186088  |
| H    | 1.944088901             | 1.917538311  | -1.97058863  |
| C    | -3.435100895            | -3.725613312 | 2.087249986  |
| H    | 2.329917254             | 4.398243104  | 0.04163856   |
| C    | -3.665881812            | -1.566737752 | -2.903017502 |
| H    | -3.853056935            | -3.894366328 | 3.089333904  |
| C    | -2.850366805            | -1.322988283 | -1.794800927 |
| H    | 2.646747935             | 3.527651131  | -2.174812486 |
| H    | 1.884776941             | 2.745178958  | 0.49986376   |
| C    | 1.705403423             | 2.962777082  | -2.200906699 |
| C    | 1.484171918             | 3.708941256  | 0.173124278  |
| H    | -4.346801003            | -0.818964363 | -4.811125975 |
| C    | -2.314939683            | -2.668307669 | 2.215069365  |
| H    | 1.327532205             | 3.021794908  | -3.228759615 |
| C    | -3.711160643            | -0.646277305 | -3.945333983 |
| H    | 0.86093345              | 4.103648194  | 0.979672017  |

|   |              |              |              |
|---|--------------|--------------|--------------|
| H | -0.924588426 | -4.16557313  | 3.028673948  |
| H | -3.662525049 | -0.926791824 | 1.975444232  |
| C | 0.738287875  | 3.589094314  | -1.17215884  |
| C | -1.280954442 | -3.15331396  | 3.251559739  |
| C | -2.949838398 | -1.345181599 | 2.701819037  |
| H | -3.517034071 | -1.544153993 | 3.621544781  |
| H | 1.224864982  | 5.567353056  | -1.888828975 |
| C | -2.943412989 | 0.510911761  | -3.848151407 |
| H | -0.41630097  | -2.490083409 | 3.3338496    |
| C | -2.1163067   | 0.705596393  | -2.739990515 |
| C | 0.31772453   | 4.981903378  | -1.684144481 |
| H | -0.253106921 | 4.931032072  | -2.620281878 |
| H | -1.766552279 | -3.189111299 | 4.236356624  |
| H | -2.968334466 | 1.262840285  | -4.632351138 |
| H | -2.199539653 | -0.588080526 | 2.946233848  |
| H | -1.213176924 | 4.913983591  | 0.89919684   |
| C | -1.259768117 | 1.947072164  | -2.679011042 |
| H | -0.268154496 | 5.542496635  | -0.948782436 |
| H | -0.312034193 | 1.728835899  | -3.188423622 |
| H | -1.254061692 | 3.385708303  | 1.813493472  |
| C | -1.819209607 | 4.032101727  | 1.131295702  |
| H | -1.738041416 | 2.759377878  | -3.239467796 |
| C | -2.27346943  | 3.27578807   | -0.135642939 |
| H | -2.784215586 | 1.479076541  | 1.039200522  |
| H | -2.711482352 | 4.38386577   | 1.667596725  |
| C | -3.246145929 | 2.15747385   | 0.30688722   |
| H | -2.391082892 | 5.042008061  | -1.460429812 |
| H | -3.428296139 | 3.689518336  | -1.965713448 |
| C | -3.017335655 | 4.22141125   | -1.098002261 |
| H | -4.108651056 | 2.616021813  | 0.810453091  |
| H | -3.633578379 | 1.575273006  | -0.536865135 |
| H | -3.867483782 | 4.669097019  | -0.564328759 |
| S | 0.596732523  | 0.195775147  | 3.032455166  |
| O | -0.302971076 | 0.203826611  | 4.188613143  |
| O | 1.335662879  | -1.02633891  | 2.683596075  |
| O | -0.084375006 | 0.841786218  | 1.773926055  |
| C | 1.88456513   | 1.508701595  | 3.362653105  |
| F | 2.787319998  | 1.516657246  | 2.367153922  |
| F | 1.305187712  | 2.713525841  | 3.43505734   |
| F | 2.498106588  | 1.236906069  | 4.510534833  |
| H | 1.990107042  | -0.468265333 | -1.085707351 |

---



**Supplementary Table 30 | Cartesian coordinate of XXIII. Units are presented in Å.**

SCF energy (in toluene) = -2833.53000327 hartree

ZPE = 0.673437 hartree

---

| Atom | Coordinates (Angstroms) |              |              |
|------|-------------------------|--------------|--------------|
|      | X                       | Y            | Z            |
| Mo   | -0.308541516            | 0.577312982  | 0.365987468  |
| P    | 0.352379363             | -0.912459408 | 2.466752952  |
| N    | 1.843437955             | 0.992223993  | 0.661296892  |
| P    | 0.260058095             | 2.066632293  | -1.69182129  |
| N    | -0.944556502            | 1.829436646  | 1.391572068  |
| H    | -1.146593795            | -1.700615145 | 5.9413488    |
| H    | 0.432896082             | -0.996863934 | 5.574005145  |
| C    | -0.349918554            | -1.660921546 | 5.185399744  |
| H    | -0.960887802            | 0.96570834   | 4.521828766  |
| H    | 0.059953749             | -2.671040614 | 5.096862707  |
| H    | -2.411335529            | 0.040014512  | 4.912379482  |
| C    | -1.647022065            | 0.199348119  | 4.139763648  |
| H    | -2.820995124            | -2.213318928 | 4.116928746  |
| C    | -0.955539235            | -1.151864378 | 3.861873414  |
| H    | 0.76798474              | 1.333013449  | 3.294253886  |
| H    | -2.158916137            | 0.585397854  | 3.252516859  |
| H    | 2.031366126             | 0.274245119  | 3.940151878  |
| C    | -2.031580923            | -2.138222647 | 3.355876424  |
| H    | 2.088511664             | -2.384725556 | 4.586950904  |
| H    | -2.490526457            | -1.800950165 | 2.420883316  |
| C    | 1.448835017             | 0.509811528  | 3.044200029  |
| H    | 4.073439237             | 1.249542218  | 3.186745021  |
| H    | -1.639972107            | -3.143421325 | 3.183820909  |
| H    | 3.264140683             | -1.508436865 | 3.581165701  |
| H    | 0.394224554             | 3.652715838  | 0.89433081   |
| C    | 2.584107543             | -2.368262725 | 3.613019542  |
| H    | -0.944431913            | 5.626216144  | -1.078405018 |
| C    | 3.69113435              | 1.285682844  | 2.170316573  |
| H    | 3.2126533               | -3.267679876 | 3.55312784   |
| C    | 2.358867368             | 0.943755824  | 1.926330165  |
| H    | 0.947342645             | 5.2440645    | 0.343008491  |
| H    | -1.684882783            | 4.073315074  | -0.653441755 |
| C    | 0.977576899             | 4.167190847  | 0.126809114  |
| C    | -1.000158718            | 4.564935019  | -1.356875363 |
| H    | 5.556913199             | 1.913469668  | 1.283111258  |
| C    | 1.610705405             | -2.394561086 | 2.411787918  |
| H    | 2.023768678             | 3.852376     | 0.21187304   |
| C    | 4.514254925             | 1.656616787  | 1.109007495  |
| H    | -1.442902797            | 4.513991041  | -2.357076116 |

|   |              |              |              |
|---|--------------|--------------|--------------|
| H | 0.380494945  | -3.956637951 | 3.362135623  |
| H | 3.112499264  | -1.402231893 | 1.132531419  |
| C | 0.415489467  | 3.952991001  | -1.296274635 |
| C | 0.855558146  | -3.740767305 | 2.398988969  |
| C | 2.467906498  | -2.287832399 | 1.12937482   |
| H | 3.129586204  | -3.164407037 | 1.094685852  |
| H | 1.471004197  | 5.729751671  | -1.915259127 |
| C | 3.982963302  | 1.694438578  | -0.17881286  |
| H | 0.098003799  | -3.793270831 | 1.612401105  |
| C | 2.639527187  | 1.371084881  | -0.379946977 |
| C | 1.369313902  | 4.692000778  | -2.262126435 |
| H | 2.377082695  | 4.257216366  | -2.259507272 |
| H | 1.584759898  | -4.540854238 | 2.212395063  |
| H | 4.597624789  | 1.978122464  | -1.028705097 |
| H | 1.877907565  | -2.299985163 | 0.211904619  |
| H | -2.463474692 | 2.480347581  | -2.817445883 |
| C | 2.024985674  | 1.421637985  | -1.752928306 |
| H | 1.01179804   | 4.729287101  | -3.291285169 |
| H | 2.666868946  | 1.98140143   | -2.44249129  |
| H | -2.235776703 | 0.721690018  | -2.67965678  |
| C | -1.993626532 | 1.603290439  | -3.279067076 |
| H | 1.941390059  | 0.397354185  | -2.139955551 |
| C | -0.467803559 | 1.769859355  | -3.45491127  |
| H | 0.06343085   | -0.37221306  | -3.317441286 |
| H | -2.452034685 | 1.46839865   | -4.268423314 |
| C | 0.127704668  | 0.461714596  | -4.017927504 |
| H | -0.674251399 | 3.832704612  | -4.24013929  |
| H | 0.875368309  | 3.051320519  | -4.651131905 |
| C | -0.194918061 | 2.880441732  | -4.488682191 |
| H | -0.439630702 | 0.182784088  | -4.916161599 |
| H | 1.173566108  | 0.589302938  | -4.324635882 |
| H | -0.617364227 | 2.551710626  | -5.448550838 |
| S | -0.610542241 | -2.548957281 | -1.020730469 |
| O | 0.508036683  | -3.446855253 | -1.309188476 |
| O | -1.488025265 | -2.809676771 | 0.129734708  |
| O | -0.141383906 | -1.055049073 | -1.045703781 |
| C | -1.731300949 | -2.646473925 | -2.517275576 |
| F | -2.670383773 | -1.685922817 | -2.458932502 |
| F | -1.023000485 | -2.49525207  | -3.640387326 |
| F | -2.321559667 | -3.837189715 | -2.51817273  |
| N | -2.394738056 | 0.092709835  | 0.041427658  |
| N | -3.484341038 | -0.112317893 | -0.074081377 |
| H | -1.622429529 | 2.409917649  | 1.89103253   |

---

**Supplementary Table 31 | Cartesian coordinate of XXIV. Units are presented in Å.**

SCF energy (in toluene) = -2833.09807794 hartree

ZPE = 0.661422 hartree

---

| Atom | Coordinates (Angstroms) |              |              |
|------|-------------------------|--------------|--------------|
|      | X                       | Y            | Z            |
| Mo   | -0.309247343            | 0.541421146  | 0.380043695  |
| P    | 0.371213047             | -0.83705176  | 2.501938319  |
| N    | 1.877811881             | 1.000307405  | 0.635794674  |
| P    | 0.201848281             | 2.051524522  | -1.640906701 |
| N    | -0.918300621            | 1.734522416  | 1.389615658  |
| H    | -1.184236674            | -1.606485458 | 5.979082064  |
| H    | 0.48803385              | -1.147316597 | 5.63425705   |
| C    | -0.393175893            | -1.650701909 | 5.215872865  |
| H    | -0.598036849            | 1.009287036  | 4.881416609  |
| H    | -0.152134069            | -2.70691116  | 5.06204036   |
| H    | -2.237802578            | 0.363414099  | 5.003939539  |
| C    | -1.373264505            | 0.459845349  | 4.330922859  |
| H    | -2.878281389            | -1.836752957 | 4.173318918  |
| C    | -0.908438185            | -0.959936326 | 3.938548635  |
| H    | 0.883523139             | 1.388250852  | 3.268857442  |
| H    | -1.677273845            | 1.058905886  | 3.466282226  |
| H    | 2.145886012             | 0.319027979  | 3.914815479  |
| C    | -2.124939185            | -1.730900827 | 3.378628665  |
| H    | 1.957553012             | -2.557176454 | 4.649610319  |
| H    | -2.585809434            | -1.191141282 | 2.544894216  |
| C    | 1.546296577             | 0.547343387  | 3.026408453  |
| H    | 4.186923363             | 1.251298809  | 3.090173121  |
| H    | -1.86867549             | -2.733826942 | 3.022220523  |
| H    | 3.162535062             | -1.618876809 | 3.741965416  |
| H    | 0.262463857             | 3.611682988  | 0.94467736   |
| C    | 2.475448194             | -2.473121274 | 3.690957641  |
| H    | -1.010747717            | 5.604503326  | -0.994106177 |
| C    | 3.774326175             | 1.291011528  | 2.085417965  |
| H    | 3.097303908             | -3.373082752 | 3.57565677   |
| C    | 2.432057471             | 0.955396815  | 1.881061521  |
| H    | 0.863440466             | 5.205032309  | 0.431193415  |
| H    | -1.747599378            | 4.037887751  | -0.610095473 |
| C    | 0.880568839             | 4.128332451  | 0.205875247  |
| C    | -1.062557417            | 4.548956298  | -1.298204495 |
| H    | 5.611827978             | 1.922176664  | 1.142613968  |
| C    | 1.525501157             | -2.388649392 | 2.476338231  |
| H    | 1.918523027             | 3.79261971   | 0.313703006  |
| C    | 4.563804083             | 1.665574584  | 1.000779856  |
| H    | -1.494088233            | 4.519958479  | -2.304857514 |

|   |              |              |              |
|---|--------------|--------------|--------------|
| H | 0.120143957  | -3.861174381 | 3.326018742  |
| H | 3.131409398  | -1.48020901  | 1.269409772  |
| C | 0.352627702  | 3.935503428  | -1.233707304 |
| C | 0.669802038  | -3.671045025 | 2.396716563  |
| C | 2.412894926  | -2.306557376 | 1.212083254  |
| H | 2.992992505  | -3.237553548 | 1.138349484  |
| H | 1.392414169  | 5.734691777  | -1.824840453 |
| C | 3.990474248  | 1.709445311  | -0.268744563 |
| H | -0.043263995 | -3.646142376 | 1.566042121  |
| C | 2.641679571  | 1.380135387  | -0.426411779 |
| C | 1.319319851  | 4.692767727  | -2.169509328 |
| H | 2.333429444  | 4.273503702  | -2.131757909 |
| H | 1.339206366  | -4.528024113 | 2.233891307  |
| H | 4.575116038  | 1.999895073  | -1.137741404 |
| H | 1.838706032  | -2.21190403  | 0.288693342  |
| H | -2.518151129 | 2.51493695   | -2.733753866 |
| C | 1.9796032    | 1.432426127  | -1.777217291 |
| H | 0.996794259  | 4.717612835  | -3.211682404 |
| H | 2.597572105  | 1.990555592  | -2.490656902 |
| H | -2.305324239 | 0.754570296  | -2.652308251 |
| C | -2.061588237 | 1.650265505  | -3.230299666 |
| H | 1.87662833   | 0.405674438  | -2.153801473 |
| C | -0.53404074  | 1.802771809  | -3.411839018 |
| H | -0.016989745 | -0.336497613 | -3.267778098 |
| H | -2.530849835 | 1.548164263  | -4.219701041 |
| C | 0.026800016  | 0.484881025  | -3.985342286 |
| H | -0.713004376 | 3.872489712  | -4.182211911 |
| H | 0.820106935  | 3.069924598  | -4.606982035 |
| C | -0.252890619 | 2.913096303  | -4.442309947 |
| H | -0.573092499 | 0.197381831  | -4.860323689 |
| H | 1.064428178  | 0.599232668  | -4.326267788 |
| H | -0.684261285 | 2.600349429  | -5.404764395 |
| S | -0.390202435 | -2.767070801 | -1.258427365 |
| O | 0.708991278  | -3.723189607 | -1.463900115 |
| O | -1.383991824 | -3.071225987 | -0.207835819 |
| O | 0.080389284  | -1.318512526 | -1.229624614 |
| C | -1.382577425 | -2.83937384  | -2.838979976 |
| F | -2.322066615 | -1.871435498 | -2.857608415 |
| F | -0.588254357 | -2.670654778 | -3.911736846 |
| F | -1.99253343  | -4.024963771 | -2.94367346  |
| N | -2.28340505  | -0.122304973 | -0.047009194 |
| N | -3.342578068 | -0.429361928 | -0.240102938 |

-----

**Supplementary Table 32 | Cartesian coordinate of the reactant complex for protonation of 1 by lutidinium. Units are presented in Å.**

SCF energy (in toluene) = -4289.81340546 hartree

ZPE = 1.442197 hartree

```

-----
Atom          Coordinates (Angstroms)
          X           Y           Z
-----
Mo          3.00651646    0.426313984  -0.109637676
Mo         -1.970290333   -1.092783803   0.614780896
P          -2.387603348   -2.562062225  -1.432904872
P           2.843615817    2.968193782  -0.107032579
N           5.156738659    1.051406235  -0.396855324
N          -4.040947467   -1.861543037   1.011212457
P          -2.499914572   -0.03231846    2.873953907
P           4.229284241   -1.825875227  -0.236404882
N           1.066447593   -0.128304261   0.143991107
N          -0.03401148   -0.445874064   0.289112553
N           2.547333806    0.419440637  -3.245052665
N           2.716500385    0.431309469  -2.12128003
N           3.253162218    0.405044462   1.910678403
N           3.379089323    0.407618222   3.039418561
N          -3.268201364    1.291353849  -0.935451595
N          -2.755564482    0.424256168  -0.374770992
N          -1.195693387   -2.710888444   1.647014803
N          -0.784077955   -3.610903794   2.19402028
H          -2.584843671   -2.007244753  -5.28751913
H           1.099779417    5.688998808  -2.290150321
H           2.689496063    4.970980927  -2.556124564
H          -3.910825546   -1.917265579  -4.12321335
C          -2.936123393   -2.384961683  -4.315600823
C           1.951237441    5.211301342  -1.781480179
H           1.584592614    2.71931118   -2.882130294
H          -2.688231172    0.029435763  -3.031501913
H           2.38911852    5.955790974  -1.11173771
H          -3.09362852   -3.460802853  -4.423364973
H           0.029026668    3.514474777  -2.623586795
H          -1.394371444   -0.165059799  -4.226651936
C          -1.742335581   -0.485552701  -3.233537744
C           0.857323145    2.998043081  -2.113516256
H          -0.169287728   -2.154041982  -4.53210471
H          -0.53274448    4.710662971  -0.668911351
C          -1.897942631   -2.01888756  -3.234122975
C           1.451318142    3.94557307   -1.053029355
H           3.941471216    2.954848806  -2.251432174
H          -4.362267499   -1.259190936  -1.838042533

```

|   |              |              |              |
|---|--------------|--------------|--------------|
| H | -1.011369988 | -0.150058601 | -2.490908092 |
| H | 0.464972964  | 2.078154959  | -1.66635647  |
| H | -4.816128944 | -2.950525226 | -2.067425573 |
| H | 4.680625277  | 4.243967236  | -1.30047163  |
| C | -0.523362923 | -2.615535293 | -3.599073056 |
| C | 0.312103954  | 4.316076629  | -0.083247074 |
| H | -2.126763048 | -5.096605233 | -3.454450243 |
| H | 2.453497418  | 5.983919917  | 1.037025228  |
| H | 0.228100317  | -2.407560238 | -2.826910601 |
| H | -0.049518408 | 3.442394171  | 0.474206132  |
| C | -4.253855312 | -2.268681565 | -1.416761363 |
| C | 4.322216305  | 3.2082866    | -1.251588787 |
| H | -6.719029838 | -3.104596063 | -0.648477128 |
| H | 6.982158192  | 3.67708545   | -1.510762976 |
| H | -0.560688549 | -3.69666846  | -3.76567699  |
| H | 0.595277691  | 5.092890802  | 0.633584932  |
| H | -3.790092117 | -4.992391557 | -2.831591362 |
| H | 4.108823506  | 5.780308966  | 0.419958169  |
| H | 4.998960631  | -0.520216805 | -2.804989808 |
| H | -4.730569416 | 0.922632401  | 1.149394156  |
| C | -2.755719674 | -5.25243756  | -2.572219043 |
| C | 3.424668852  | 5.520082499  | 1.237895665  |
| H | 3.850901262  | -3.257568228 | -3.773157719 |
| H | -3.535985643 | 3.595087428  | 2.244686294  |
| C | -6.126218147 | -2.766140359 | 0.198256047  |
| C | 6.784460264  | 2.690635457  | -1.097984167 |
| H | -2.74155204  | -6.33087759  | -2.355429887 |
| H | 3.821576461  | 5.989141869  | 2.150462898  |
| C | -4.829360947 | -2.29534947  | -0.019680628 |
| C | 5.462812649  | 2.282369146  | -0.904987416 |
| H | 5.757945836  | -1.81794245  | -3.735278396 |
| H | -5.49261528  | 2.210885324  | 2.10051997   |
| H | 2.860206226  | -2.075798126 | -2.905155414 |
| H | -2.578090187 | 2.468076072  | 1.254940076  |
| C | 5.558460186  | -1.454601541 | -2.71655203  |
| C | -4.919006191 | 1.273594675  | 2.166686793  |
| C | 3.533559747  | -2.927462011 | -2.7726645   |
| C | -2.87199223  | 2.716345102  | 2.279277188  |
| H | 8.86655095   | 2.14176083   | -0.891505516 |
| H | -7.644250438 | -3.187814838 | 1.68135316   |
| C | -2.249348804 | -4.494624683 | -1.327964184 |
| C | 3.332531237  | 3.997114304  | 1.46550925   |
| H | 6.528333782  | -1.23480788  | -2.255829367 |
| H | -5.560116084 | 0.541193221  | 2.670225277  |
| C | 7.831308187  | 1.837395556  | -0.753919229 |
| C | -6.639684172 | -2.815031084 | 1.493739816  |
| H | 2.966408177  | -3.748307706 | -2.32336073  |
| H | -1.972621796 | 3.014103132  | 2.826706606  |
| H | -0.120680035 | -4.624837001 | -1.903557302 |
| H | 1.311349276  | 4.074775393  | 2.356517801  |
| H | -4.177120694 | -4.877909087 | -0.330082215 |
| H | 5.521470493  | 3.837409153  | 1.24960319   |

|   |              |              |              |
|---|--------------|--------------|--------------|
| C | 4.785065611  | -2.551173248 | -1.948711556 |
| C | -3.620708082 | 1.548521142  | 2.958288451  |
| C | -0.777879569 | -4.885433733 | -1.06849278  |
| C | 2.316767308  | 3.713886995  | 2.594422758  |
| C | -3.103342562 | -4.975024661 | -0.132161381 |
| C | 4.72837925   | 3.530794416  | 1.941084613  |
| H | -2.898827523 | -6.041861754 | 0.038388883  |
| H | 4.940808904  | 4.004629726  | 2.910443235  |
| H | 6.063666745  | -4.03500165  | -2.865158277 |
| H | -4.749139914 | 2.817787546  | 4.298797686  |
| C | -5.833222414 | -2.378312428 | 2.543110495  |
| C | 7.519089355  | 0.585342837  | -0.22853795  |
| H | -0.380184952 | -4.416796383 | -0.164790478 |
| H | 2.251369151  | 2.648026979  | 2.828946488  |
| C | -4.545827187 | -1.902532528 | 2.281788844  |
| C | 6.182613679  | 0.211681129  | -0.066263061 |
| C | 5.716847354  | -3.77617967  | -1.853717282 |
| C | -4.044802521 | 1.975870269  | 4.377877847  |
| H | 6.609978032  | -3.576419194 | -1.247949162 |
| H | -4.563915625 | 1.173382357  | 4.917249106  |
| H | -0.716504903 | -5.975068949 | -0.930408205 |
| H | 2.642786252  | 4.234157354  | 3.507376491  |
| H | 8.30414996   | -0.111827654 | 0.054380886  |
| H | -6.193798818 | -2.401099245 | 3.568785107  |
| H | -2.877938866 | -4.443862327 | 0.795376687  |
| H | 4.794881489  | 2.449418434  | 2.082297596  |
| H | 3.337528564  | -4.864697997 | -0.529216271 |
| H | -1.133526415 | 2.229360679  | 4.644104665  |
| C | 5.8356822    | -1.1498964   | 0.482759005  |
| C | -3.67144575  | -1.413907449 | 3.411337687  |
| H | 5.217117781  | -4.661855632 | -1.449406882 |
| H | -3.204576597 | 2.3155291    | 4.990751326  |
| H | 6.687694093  | -1.830824188 | 0.36481045   |
| H | -4.289611721 | -1.155267585 | 4.28005558   |
| H | 1.991896935  | -3.775804489 | -0.121152592 |
| H | -0.067857446 | 1.600270035  | 3.363687254  |
| C | 2.872847552  | -4.291918482 | 0.28002079   |
| C | -0.501551482 | 1.385279008  | 4.348791147  |
| H | 5.640892875  | -1.06652923  | 1.561608009  |
| H | -3.004966258 | -2.22848087  | 3.730954481  |
| C | 3.849643725  | -3.311366696 | 0.958721274  |
| C | -1.250163755 | 0.035886067  | 4.359195833  |
| H | 2.234596631  | -2.183638102 | 1.934637669  |
| H | 0.308308956  | -0.959287293 | 3.169726153  |
| H | 2.516875644  | -5.015490563 | 1.027630296  |
| H | 0.329222409  | 1.335446498  | 5.066714246  |
| C | 3.139197573  | -2.74015698  | 2.20118184   |
| C | -0.194542785 | -1.065384043 | 4.136187157  |
| H | 5.668992549  | -4.539400582 | 0.63492376   |
| H | -2.631944701 | 0.54591419   | 6.021326869  |
| H | 5.782402264  | -3.423191001 | 2.00918403   |
| H | -2.362310711 | -1.194401699 | 5.80934469   |

|   |              |              |              |
|---|--------------|--------------|--------------|
| C | 5.102178438  | -4.071679578 | 1.443939419  |
| C | -1.889720772 | -0.206376815 | 5.743247071  |
| H | 2.846270733  | -3.574816549 | 2.854834407  |
| H | 0.568720688  | -0.983299057 | 4.923130106  |
| H | 3.785325417  | -2.079590978 | 2.788226746  |
| H | -0.618035041 | -2.072957986 | 4.201050797  |
| H | 4.784797427  | -4.873079956 | 2.127481799  |
| H | -1.097549429 | -0.180147999 | 6.505912546  |
| H | -4.381845322 | 2.466847176  | -1.845213731 |
| C | -6.777405615 | 3.515194032  | -3.8522425   |
| C | -6.642772516 | 4.893061987  | -3.634472155 |
| C | -5.663242663 | 5.363896191  | -2.750449513 |
| C | -4.831635732 | 4.467775383  | -2.093898617 |
| N | -4.99771554  | 3.132599594  | -2.344155611 |
| C | -5.939712526 | 2.624818729  | -3.197224646 |
| H | -7.530995283 | 3.127801894  | -4.531988951 |
| H | -7.296673841 | 5.593152065  | -4.148222522 |
| H | -5.541444035 | 6.42746318   | -2.566168069 |
| C | -3.761456242 | 4.85107529   | -1.119401824 |
| H | -2.791397048 | 4.423964253  | -1.408817964 |
| H | -3.664878791 | 5.939158854  | -1.062449278 |
| H | -3.98819719  | 4.468401571  | -0.114502612 |
| C | -5.985625696 | 1.13567696   | -3.35729762  |
| H | -5.065037415 | 0.761121529  | -3.826945045 |
| H | -6.079806797 | 0.638691792  | -2.381525451 |
| H | -6.833856411 | 0.842427487  | -3.982724651 |

---



**Supplementary Table 33 | Cartesian coordinate of the transition state for protonation of a terminal dinitrogen ligand in 1 by lutidinium. Units are presented in Å.**

SCF energy (in toluene) = -4289.79497531 hartree

ZPE = 1.437074 hartree

imaginary frequency: 1033i

---

| Atom | Coordinates (Angstroms) |              |              |
|------|-------------------------|--------------|--------------|
|      | X                       | Y            | Z            |
| Mo   | 3.064380177             | 0.378827923  | -0.091650051 |
| Mo   | -2.009976507            | -0.940106368 | 0.382749833  |
| P    | -2.342611027            | -2.366704275 | -1.726725403 |
| P    | 2.930735153             | 2.913517979  | -0.320532506 |
| N    | 5.246651898             | 0.969717769  | -0.307424952 |
| N    | -4.051660231            | -1.806081108 | 0.727119494  |
| P    | -2.589942961            | 0.017618685  | 2.676546675  |
| P    | 4.277834618             | -1.884571907 | 0.012855615  |
| N    | 1.119338427             | -0.100354354 | 0.089298971  |
| N    | -0.00494368             | -0.34980282  | 0.175784782  |
| N    | 2.748330246             | 0.094915286  | -3.233060783 |
| N    | 2.872746988             | 0.20900963   | -2.109717063 |
| N    | 3.193539952             | 0.515220618  | 1.936210238  |
| N    | 3.244633693             | 0.594714386  | 3.068199453  |
| N    | -2.95370604             | 1.593272217  | -1.096683767 |
| N    | -2.665308657            | 0.591921438  | -0.528363392 |
| N    | -1.169202828            | -2.62480041  | 1.383242245  |
| N    | -0.70591427             | -3.512035024 | 1.895041779  |
| H    | -2.529687847            | -1.678223533 | -5.554671811 |
| H    | 1.361738729             | 5.461643288  | -2.816596873 |
| H    | 2.975093896             | 4.754807444  | -2.896696636 |
| H    | -3.86576525             | -1.668543872 | -4.402169935 |
| C    | -2.878035396            | -2.10365028  | -4.601988333 |
| C    | 2.170921597             | 5.034251282  | -2.205176405 |
| H    | 1.897951778             | 2.480650808  | -3.177456152 |
| H    | -2.711977995            | 0.267817312  | -3.224032883 |
| H    | 2.54173242              | 5.830373332  | -1.555034908 |
| H    | -3.003483759            | -3.178310402 | -4.753569375 |
| H    | 0.326649701             | 3.280911657  | -3.084647821 |
| H    | -1.413539408            | 0.156102143  | -4.420140839 |
| C    | -1.751343566            | -0.211611922 | -3.440220593 |
| C    | 1.113308782             | 2.799824397  | -2.48409636  |
| H    | -0.117108857            | -1.781528746 | -4.788114872 |
| H    | -0.391954959            | 4.580302558  | -1.260513359 |
| C    | -1.85665578             | -1.747208878 | -3.50100051  |
| C    | 1.62039785              | 3.812734314  | -1.438182304 |

|   |              |              |              |
|---|--------------|--------------|--------------|
| H | 4.175809809  | 2.733349984  | -2.37585097  |
| H | -4.357733046 | -1.122221103 | -2.095600885 |
| H | -1.032896226 | 0.119571602  | -2.684175846 |
| H | 0.685817701  | 1.907166036  | -2.016199226 |
| H | -4.75163748  | -2.817271507 | -2.397634576 |
| H | 4.857394883  | 4.087446443  | -1.472187937 |
| C | -0.461703359 | -2.28849476  | -3.875844452 |
| C | 0.405210384  | 4.23330398   | -0.586768864 |
| H | -2.003693524 | -4.817543482 | -3.826618901 |
| H | 2.468807073  | 6.00167041   | 0.558711279  |
| H | 0.279113855  | -2.084309642 | -3.092443905 |
| H | 0.003916393  | 3.391210106  | -0.008179762 |
| C | -4.217515558 | -2.144003994 | -1.71520709  |
| C | 4.487869902  | 3.059500265  | -1.372500248 |
| H | -6.653370076 | -3.105814772 | -1.006343621 |
| H | 7.158795727  | 3.498798991  | -1.495470031 |
| H | -0.464671436 | -3.363234708 | -4.083331571 |
| H | 0.627846308  | 5.056682135  | 0.099672726  |
| H | -3.671319139 | -4.762558723 | -3.211142741 |
| H | 4.169462534  | 5.767670935  | 0.097146182  |
| H | 5.174655833  | -0.750491523 | -2.590060728 |
| H | -4.713361548 | 0.960906662  | 0.895820244  |
| C | -2.634738119 | -5.016772541 | -2.95514834  |
| C | 3.420390983  | 5.560948945  | 0.872509045  |
| H | 4.061152669  | -3.580460918 | -3.417963589 |
| H | -3.682046689 | 3.638035714  | 2.139406912  |
| C | -6.085223708 | -2.769824582 | -0.142130294 |
| C | 6.928621405  | 2.545405475  | -1.025844742 |
| H | -2.604417352 | -6.101973362 | -2.778113011 |
| H | 3.740575729  | 6.096399989  | 1.778664682  |
| C | -4.804470046 | -2.243642762 | -0.328506652 |
| C | 5.593901745  | 2.158372231  | -0.88326434  |
| H | 5.946643007  | -2.11207544  | -3.41266029  |
| H | -5.569295628 | 2.218058766  | 1.813924743  |
| H | 3.033686108  | -2.332259479 | -2.700742379 |
| H | -2.630082128 | 2.579907364  | 1.171098317  |
| C | 5.717902318  | -1.684105274 | -2.425728832 |
| C | -4.984201364 | 1.290782286  | 1.902287977  |
| C | 3.697104732  | -3.168502953 | -2.465059967 |
| C | -2.991400415 | 2.781574652  | 2.184343139  |
| H | 8.989720202  | 2.000251937  | -0.661725932 |
| H | -7.605500874 | -3.290893952 | 1.305911003  |
| C | -2.146309186 | -4.296272966 | -1.681493261 |
| C | 3.3088442    | 4.058395288  | 1.200829854  |
| H | 6.674833671  | -1.445743703 | -1.947139327 |
| H | -5.641190632 | 0.534319654  | 2.347178095  |
| C | 7.945271157  | 1.712471791  | -0.563457027 |
| C | -6.613744625 | -2.874191883 | 1.144044228  |
| H | 3.106642272  | -3.94996027  | -1.977193429 |
| H | -2.137216986 | 3.087432089  | 2.795032143  |
| H | -0.012052785 | -4.340864869 | -2.257214373 |
| H | 1.232106254  | 4.210135179  | 1.941493904  |

|   |              |              |              |
|---|--------------|--------------|--------------|
| H | -4.061403468 | -4.790135825 | -0.707560923 |
| H | 5.505786624  | 3.873196031  | 1.148886426  |
| C | 4.910131418  | -2.725491266 | -1.616427023 |
| C | -3.741574493 | 1.567477533  | 2.776713542  |
| C | -0.664295944 | -4.660258914 | -1.439322524 |
| C | 2.213150612  | 3.854627222  | 2.271012404  |
| C | -2.985675321 | -4.849229768 | -0.506685698 |
| C | 4.664497597  | 3.628726458  | 1.807314533  |
| H | -2.739455961 | -5.911989739 | -0.369593268 |
| H | 4.816646107  | 4.181045063  | 2.746233296  |
| H | 6.225682167  | -4.263530379 | -2.37536123  |
| H | -4.983576702 | 2.735537103  | 4.106607148  |
| C | -5.841150441 | -2.436315255 | 2.21753731   |
| C | 7.590872591  | 0.501701214  | 0.027221506  |
| H | -0.278133561 | -4.228024886 | -0.512540433 |
| H | 2.116968189  | 2.805086595  | 2.561465347  |
| C | -4.570017409 | -1.901952157 | 1.988685844  |
| C | 6.242959398  | 0.149866599  | 0.13789888   |
| C | 5.836423067  | -3.93874085  | -1.399029779 |
| C | -4.24753709  | 1.921746193  | 4.188592407  |
| H | 6.704675055  | -3.698431043 | -0.772383067 |
| H | -4.753239179 | 1.079724618  | 4.678107239  |
| H | -0.57506591  | -5.753286607 | -1.355735381 |
| H | 2.482821719  | 4.425344465  | 3.172039202  |
| H | 8.35095966   | -0.179627396 | 0.401992562  |
| H | -6.215783734 | -2.501407848 | 3.236207053  |
| H | -2.78822492  | -4.341330295 | 0.440379299  |
| H | 4.709577647  | 2.562864025  | 2.042976654  |
| H | 3.36796547   | -4.930627962 | -0.101566564 |
| H | -1.31606629  | 2.242514385  | 4.557945945  |
| C | 5.852830963  | -1.165370139 | 0.762816928  |
| C | -3.73525654  | -1.412259089 | 3.147291735  |
| H | 5.318840761  | -4.796766133 | -0.958733619 |
| H | -3.450453312 | 2.276865909  | 4.848615596  |
| H | 6.703038885  | -1.858261873 | 0.740138215  |
| H | -4.381054492 | -1.194622352 | 4.007251863  |
| H | 2.022544818  | -3.805202202 | 0.192420261  |
| H | -0.209102768 | 1.687971667  | 3.277382387  |
| C | 2.886001591  | -4.301046471 | 0.653760259  |
| C | -0.657595212 | 1.425653219  | 4.244019622  |
| H | 5.604281371  | -1.001266273 | 1.821976886  |
| H | -3.052447858 | -2.213636989 | 3.466855043  |
| C | 3.852759218  | -3.282140329 | 1.29137024   |
| C | -1.377968339 | 0.062084414  | 4.192181915  |
| H | 2.218238871  | -2.084359262 | 2.141539349  |
| H | 0.2193893    | -0.876952404 | 3.006988204  |
| H | 2.502200997  | -4.969924332 | 1.437560683  |
| H | 0.159264402  | 1.367877649  | 4.976928666  |
| C | 3.114036746  | -2.620015347 | 2.471053391  |
| C | -0.299783186 | -1.015251676 | 3.960813994  |
| H | 5.669344115  | -4.55068977  | 1.120740129  |
| H | -2.811002633 | 0.497911589  | 5.830309881  |

|   |              |              |              |
|---|--------------|--------------|--------------|
| H | 5.746688468  | -3.341400789 | 2.416626396  |
| H | -2.499606591 | -1.230954325 | 5.582169836  |
| C | 5.079102317  | -4.019929286 | 1.871682396  |
| C | -2.046810215 | -0.232006172 | 5.552155682  |
| H | 2.805420629  | -3.40347663  | 3.178753941  |
| H | 0.447886292  | -0.943363143 | 4.763309763  |
| H | 3.747557899  | -1.916615515 | 3.02146906   |
| H | -0.709810719 | -2.03070838  | 3.994839377  |
| H | 4.72672031   | -4.768067774 | 2.597438723  |
| H | -1.274192591 | -0.209551346 | 6.334617108  |
| H | -4.03357622  | 2.131847686  | -1.302594369 |
| C | -7.432950301 | 3.290432513  | -2.060170629 |
| C | -7.226023318 | 4.669557844  | -2.059902323 |
| C | -5.944238822 | 5.166318973  | -1.832060735 |
| C | -4.893036288 | 4.274824166  | -1.598401018 |
| N | -5.11888892  | 2.939861009  | -1.595060973 |
| C | -6.352619017 | 2.436650319  | -1.827654011 |
| H | -8.418679078 | 2.871315746  | -2.244338091 |
| H | -8.0556173   | 5.349891176  | -2.241398684 |
| H | -5.748416996 | 6.235377307  | -1.8356395   |
| C | -3.487798943 | 4.748377615  | -1.34277426  |
| H | -2.771170996 | 4.218124191  | -1.980475421 |
| H | -3.403362779 | 5.82392422   | -1.527849784 |
| H | -3.192148001 | 4.552132218  | -0.303875614 |
| C | -6.50290552  | 0.93989519   | -1.848273016 |
| H | -5.923927339 | 0.506629649  | -2.675013962 |
| H | -6.142219179 | 0.487505624  | -0.916369065 |
| H | -7.5511875   | 0.655236569  | -1.983823039 |

---

**Supplementary Table 34 | Cartesian coordinate of the product complex for protonation of a terminal dinitrogen ligand in 1 by lutidinium. Units are presented in Å.**

SCF energy (in toluene) = -4289.80099118 hartree

ZPE = 1.440119 hartree

```

-----
Atom          Coordinates (Angstroms)
          X           Y           Z
-----
Mo      3.100398543   0.180335551  -0.078324009
Mo     -2.017931589  -0.787138268   0.411176457
P      -2.476997113  -2.191986341  -1.698619099
P       3.022877386   2.708983878  -0.479872388
N       5.296438377   0.694925753  -0.381901787
N      -4.073999507  -1.607397128   0.843217929
P      -2.509366549   0.232182789   2.703238721
P       4.249569909  -2.112657042   0.188766238
N       1.157545909  -0.207552284   0.13477316
N       0.016221037  -0.387885059   0.216995385
N       2.764000568  -0.312147213  -3.193520629
N       2.892679153  -0.126229383  -2.081511285
N       3.278933182   0.46603051    1.930821032
N       3.37064321   0.630353543   3.050212044
N      -2.772858447   1.819824859  -1.008105127
N      -2.586752431   0.752033523  -0.457106901
N      -1.237964232  -2.551338734   1.441499423
N      -0.786334857  -3.434889153   1.96169808
H      -2.84838236   -1.507721776  -5.508514194
H       1.44877867   5.107487338  -3.108021378
H       3.066346458   4.405412616  -3.140906038
H      -4.129905321  -1.52005167   -4.297000498
C      -3.14696933   -1.941437873  -4.542912357
C       2.257967791   4.721855339  -2.470218069
H       1.968384475   2.11640159   -3.293105404
H      -2.947474241   0.433479915  -3.179672669
H       2.622130048   5.557470654  -1.867724482
H      -3.263402103  -3.016986753  -4.693446047
H       0.399431895   2.927589414  -3.234307227
H      -1.707845186   0.333149829  -4.434489993
C      -1.99172259   -0.034974922  -3.437854234
C       1.189361106   2.478977951  -2.614457887
H      -0.410586764  -1.599486766  -4.865601715
H      -0.306765489   4.321233185  -1.470873614
C      -2.080010594  -1.571492811  -3.490322832
C       1.707160405   3.547786249  -1.632596378
H       4.235532814   2.380278602  -2.536550409
H      -4.505682069  -0.926143751  -1.958855809

```

|   |              |              |              |
|---|--------------|--------------|--------------|
| H | -1.242390151 | 0.31017947   | -2.719967762 |
| H | 0.760226381  | 1.619321529  | -2.090719723 |
| H | -4.914215041 | -2.619942901 | -2.246195706 |
| H | 4.968767583  | 3.753968689  | -1.709328373 |
| C | -0.697148145 | -2.097055351 | -3.928559111 |
| C | 0.503356729  | 4.019778042  | -0.791651081 |
| H | -2.195585096 | -4.640253824 | -3.811556493 |
| H | 2.616756658  | 5.849692752  | 0.230903969  |
| H | 0.080655526  | -1.867363239 | -3.189632098 |
| H | 0.108300935  | 3.216026844  | -0.157729852 |
| C | -4.344944737 | -1.949720487 | -1.590082078 |
| C | 4.570175047  | 2.743783223  | -1.553846913 |
| H | -6.759927306 | -2.876742035 | -0.774704533 |
| H | 7.247530526  | 3.085454574  | -1.77194024  |
| H | -0.690903869 | -3.174801758 | -4.120023366 |
| H | 0.738733047  | 4.88344601   | -0.160929026 |
| H | -3.846279438 | -4.600192742 | -3.151088374 |
| H | 4.299436657  | 5.559379769  | -0.264980557 |
| H | 5.11897928   | -1.239498953 | -2.49388697  |
| H | -4.654457089 | 1.184792942  | 0.942781412  |
| C | -2.801016951 | -4.845196768 | -2.923644818 |
| C | 3.570646348  | 5.412163991  | 0.542118653  |
| H | 3.833764819  | -4.074800343 | -3.072561514 |
| H | -3.553199406 | 3.873723642  | 2.166951828  |
| C | -6.151441938 | -2.543678639 | 0.062327887  |
| C | 7.001475384  | 2.168997289  | -1.241065199 |
| H | -2.756203194 | -5.930052587 | -2.747809982 |
| H | 3.92539204   | 5.993038894  | 1.406372601  |
| C | -4.869878015 | -2.041101881 | -0.178858208 |
| C | 5.659890849  | 1.835906567  | -1.037045156 |
| H | 5.782655585  | -2.693373664 | -3.2507762   |
| H | -5.459904486 | 2.473660376  | 1.85235753   |
| H | 2.899529595  | -2.716582325 | -2.429861772 |
| H | -2.560711928 | 2.81029289   | 1.15213601   |
| C | 5.6191054    | -2.188162445 | -2.287983377 |
| C | -4.894102199 | 1.536237335  | 1.949990515  |
| C | 3.526686321  | -3.566262814 | -2.146742307 |
| C | -2.876380092 | 3.005912297  | 2.181045823  |
| H | 9.054004513  | 1.574387448  | -0.911477695 |
| H | -7.623058106 | -3.016407337 | 1.572849871  |
| C | -2.285496874 | -4.12123348  | -1.662530422 |
| C | 3.444421917  | 3.933925283  | 0.961607127  |
| H | 6.606314106  | -1.972390486 | -1.862998025 |
| H | -5.558826797 | 0.803791634  | 2.423558842  |
| C | 8.004651919  | 1.328696519  | -0.76365948  |
| C | -6.630622598 | -2.620180016 | 1.36850817   |
| H | 2.913268581  | -4.269852925 | -1.575408454 |
| H | -1.995411633 | 3.293621537  | 2.761789332  |
| H | -0.174846856 | -4.175377551 | -2.310574821 |
| H | 1.382538021  | 4.159395246  | 1.719363304  |
| H | -4.178331407 | -4.621652554 | -0.651984294 |
| H | 5.637143452  | 3.72146901   | 0.880780695  |

|   |              |              |              |
|---|--------------|--------------|--------------|
| C | 4.790222167  | -3.121690392 | -1.376712231 |
| C | -3.630094727 | 1.80516401   | 2.797200962  |
| C | -0.79447877  | -4.474943654 | -1.460097311 |
| C | 2.363541947  | 3.813605291  | 2.058743208  |
| C | -3.098698507 | -4.679361007 | -0.471787401 |
| C | 4.804762127  | 3.514404123  | 1.563478078  |
| H | -2.848789987 | -5.7422406   | -0.343241375 |
| H | 4.9801881    | 4.101539108  | 2.476596054  |
| H | 6.0057595    | -4.777215674 | -2.046509841 |
| H | -4.830344334 | 2.998698672  | 4.138938731  |
| C | -5.81565972  | -2.176866692 | 2.407188158  |
| C | 7.632116388  | 0.167057843  | -0.091107508 |
| H | -0.373865372 | -4.011680317 | -0.56307875  |
| H | 2.258267855  | 2.787327788  | 2.41991709   |
| C | -4.545309757 | -1.666702402 | 2.123304188  |
| C | 6.278003175  | -0.129641083 | 0.085002214  |
| C | 5.664112036  | -4.359140063 | -1.088021964 |
| C | -4.098177429 | 2.181491045  | 4.216801982  |
| H | 6.563094198  | -4.11385933  | -0.508413815 |
| H | -4.597168108 | 1.352398923  | 4.734840502  |
| H | -0.696464446 | -5.564705403 | -1.349465462 |
| H | 2.653948066  | 4.439472629  | 2.915564998  |
| H | 8.382439238  | -0.515126568 | 0.301205917  |
| H | -6.157094468 | -2.215646703 | 3.43856288   |
| H | -2.88698745  | -4.176721364 | 0.474801141  |
| H | 4.840180992  | 2.457878482  | 1.839311996  |
| H | 3.226855625  | -5.115123382 | 0.381380119  |
| H | -1.0895688   | 2.460771057  | 4.465425738  |
| C | 5.867595234  | -1.381248886 | 0.820952168  |
| C | -3.66692433  | -1.162690116 | 3.242843438  |
| H | 5.122785387  | -5.15553067  | -0.567495365 |
| H | -3.28086209  | 2.543482653  | 4.848193992  |
| H | 6.695287532  | -2.101031291 | 0.825352819  |
| H | -4.285300316 | -0.902934045 | 4.11064283   |
| H | 1.928776258  | -3.925831247 | 0.625899641  |
| H | -0.069132954 | 1.833290302  | 3.147505783  |
| C | 2.796477396  | -4.406472006 | 1.095731154  |
| C | -0.473879611 | 1.614286861  | 4.14390129   |
| H | 5.663589017  | -1.124906457 | 1.871288     |
| H | -2.996360672 | -1.970218746 | 3.57230553   |
| C | 3.821357618  | -3.372215131 | 1.603567887  |
| C | -1.242379723 | 0.276949258  | 4.169626821  |
| H | 2.265731788  | -2.04502193  | 2.410628119  |
| H | 0.270925672  | -0.758243022 | 2.957386988  |
| H | 2.426357319  | -4.991130187 | 1.950068979  |
| H | 0.377329426  | 1.549341169  | 4.83601336   |
| C | 3.15504684   | -2.585756671 | 2.749153537  |
| C | -0.21594508  | -0.848512795 | 3.933461554  |
| H | 5.577461986  | -4.725941331 | 1.476620099  |
| H | -2.589220858 | 0.823925821  | 5.845505492  |
| H | 5.765242439  | -3.402221744 | 2.643218667  |
| H | -2.355449816 | -0.923875516 | 5.64744746   |

|   |              |              |              |
|---|--------------|--------------|--------------|
| C | 5.046214919  | -4.101263543 | 2.198499779  |
| C | -1.866399024 | 0.054770661  | 5.563717391  |
| H | 2.847186696  | -3.295750085 | 3.53097441   |
| H | 0.564053739  | -0.782133184 | 4.704856777  |
| H | 3.834667942  | -1.865627727 | 3.216032252  |
| H | -0.663188271 | -1.845710312 | 4.015860954  |
| H | 4.701471388  | -4.76119452  | 3.008370671  |
| H | -1.062171315 | 0.072847783  | 6.313728486  |
| H | -3.769238433 | 2.13087495   | -1.178245935 |
| C | -7.635343464 | 3.499691381  | -2.381594502 |
| C | -7.40211243  | 4.865348124  | -2.536514309 |
| C | -6.129092198 | 5.366166384  | -2.272336599 |
| C | -5.121694538 | 4.485812317  | -1.856621954 |
| N | -5.353945603 | 3.164590766  | -1.708871921 |
| C | -6.582921317 | 2.675088672  | -1.967416022 |
| H | -8.615571127 | 3.072553814  | -2.580360648 |
| H | -8.201703214 | 5.529437383  | -2.859664352 |
| H | -5.910350685 | 6.425523725  | -2.3839598   |
| C | -3.730215763 | 4.978918327  | -1.546574235 |
| H | -2.978043115 | 4.404532544  | -2.101068008 |
| H | -3.620159464 | 6.039581373  | -1.797084507 |
| H | -3.501928759 | 4.852296437  | -0.479597566 |
| C | -6.772672566 | 1.187046304  | -1.807360003 |
| H | -6.199821968 | 0.642692199  | -2.571651056 |
| H | -6.418078194 | 0.850377771  | -0.824809806 |
| H | -7.825766732 | 0.903096105  | -1.911693258 |

---



**Supplementary Table 35 | Cartesian coordinate of the transition state for elimination of a terminal dinitrogen ligand trans to the NNH group in II. Units are presented in Å.**

SCF energy (in toluene) = -3962.99773733 hartree

ZPE = 1.295192 hartree

imaginary frequency: 70i

```

-----
Atom          Coordinates (Angstroms)
          X              Y              Z
-----
Mo         -2.926412567    1.815830106    1.787003454
Mo         2.236463706     1.832097899    1.71627339
P          2.690803741    -0.589994917    2.410247608
P         -3.161018178     3.408472139    3.793269838
N         -5.181803854     1.875816967    2.124578634
N          4.382039313    1.559029539    1.056095458
P          2.746308082     4.11587768     0.703325688
P         -3.825764201     0.241503198   -0.061295426
N         -0.964337859     1.792003761    1.591458566
N          0.203038537     1.776251132    1.540915579
N         -2.716671521    -0.642211858    3.776352354
N         -2.790828278     0.241504279    3.069525937
N         -3.053977579     3.383286141    0.490194413
N         -3.121486253     4.256022353   -0.230956986
N          2.434787222     2.893329603    4.544131472
N          2.493132798     2.430446612    3.390261479
N          1.760969851     0.930815442   -1.279456563
N          1.338290282     0.572623766   -2.239194878
H          2.807566652    -2.713517564    5.659081574
H         -1.927207529     3.442035906    7.475443755
H         -3.453922369     2.796628983    6.870380005
H          4.16792484     -1.9429596     4.843617813
C          3.174247843    -2.378163161    4.678118477
C         -2.674828517     3.544272743    6.675377296
H         -2.110515439     1.118251075    5.534182993
H          3.037458373     0.32802041     5.266981546
H         -3.120764755     4.537014745    6.774125927
H          3.288512374    -3.267224612    4.054467597
H         -0.635191224     1.852638279    6.174481825
H          1.785386396    -0.599700679    6.099388134
C          2.080575698    -0.187334148    5.123331594
C         -1.362043127     1.896749977    5.351238047
H          0.410825228    -2.23848729     4.992622658
H         -0.045879459     4.108349529    5.894679553
C          2.175034899    -1.345702783    4.112513392
C         -1.97417844     3.310970957    5.319316297

```

|   |              |              |              |
|---|--------------|--------------|--------------|
| H | -4.38723445  | 1.679001261  | 4.93730858   |
| H | 4.625339942  | 0.153342793  | 3.630816102  |
| H | 1.340060322  | 0.560554943  | 4.831439295  |
| H | -0.832150488 | 1.659029639  | 4.423453637  |
| H | 5.113693423  | -1.266664883 | 2.707749439  |
| H | -5.241847981 | 3.197357482  | 5.203923126  |
| C | 0.771394728  | -1.972488846 | 3.989010864  |
| C | -0.816827411 | 4.314046604  | 5.140298087  |
| H | 2.290997865  | -3.810204757 | 2.250518017  |
| H | -3.11346862  | 6.186775459  | 5.445758578  |
| H | 0.045869499  | -1.271166714 | 3.559170826  |
| H | -0.331785003 | 4.208276537  | 4.162326204  |
| C | 4.543081589  | -0.331641011 | 2.646708467  |
| C | -4.730703471 | 2.598076697  | 4.440796199  |
| H | 7.077808218  | -0.3812268   | 1.702557733  |
| H | -7.440740545 | 2.555853782  | 4.549894764  |
| H | 0.764822331  | -2.890135816 | 3.391471958  |
| H | -1.136774665 | 5.353578997  | 5.267771104  |
| H | 3.99769207   | -3.432953664 | 1.919711112  |
| H | -4.762699493 | 5.520787539  | 5.432261716  |
| H | -4.942551817 | -0.985151912 | 2.413783514  |
| H | 4.635040992  | 3.769932566  | 2.966686137  |
| C | 2.979945961  | -3.390885181 | 1.511607199  |
| C | -3.998725724 | 6.021431361  | 4.823728437  |
| H | -3.440498611 | -3.405569284 | 1.060813238  |
| H | 3.311144568  | 6.519009629  | 3.623806765  |
| C | 6.491636637  | 0.408325841  | 1.23913122   |
| C | -7.072400409 | 2.270512371  | 3.567543288  |
| H | 2.957806709  | -4.056717776 | 0.63608838   |
| H | -4.397055498 | 7.011900111  | 4.558601511  |
| C | 5.154188068  | 0.574872048  | 1.607838606  |
| C | -5.694744947 | 2.235400248  | 3.336816147  |
| H | -5.527158013 | -2.565860511 | 1.883585819  |
| H | 5.369691026  | 5.373912638  | 3.157235211  |
| H | -2.600914796 | -1.956044848 | 1.627326414  |
| H | 2.375490896  | 5.013921966  | 3.552576953  |
| C | -5.337105261 | -1.533886899 | 1.555339754  |
| C | 4.903945913  | 4.688250363  | 2.435091241  |
| C | -3.117331973 | -2.395333153 | 0.769513415  |
| C | 2.744630291  | 5.853331221  | 2.955484378  |
| H | -9.030691883 | 1.972568079  | 2.701373469  |
| H | 8.096562     | 1.130813807  | -0.014145419 |
| C | 2.586977033  | -1.97093372  | 1.058443179  |
| C | -3.683316503 | 5.253148312  | 3.524066742  |
| H | -6.304909879 | -1.098309265 | 1.282113434  |
| H | 5.666752266  | 4.44220348   | 1.686389845  |
| C | -7.955262709 | 1.94546753   | 2.540178532  |
| C | 7.057520885  | 1.250810838  | 0.285197905  |
| H | -2.396500199 | -2.506987659 | -0.045968193 |
| H | 1.884440249  | 6.421492572  | 2.589979025  |
| H | 0.428992815  | -2.365049141 | 1.276944789  |
| H | -1.642133875 | 6.076242925  | 3.33804161   |

|   |              |              |              |
|---|--------------|--------------|--------------|
| H | 4.596785055  | -1.738135855 | 0.190304548  |
| H | -5.834585952 | 4.887724132  | 3.201791029  |
| C | -4.360599613 | -1.57533332  | 0.356951207  |
| C | 3.677852724  | 5.394399658  | 1.811644691  |
| C | 1.136498374  | -1.99399904  | 0.528037766  |
| C | -2.565385608 | 5.993386831  | 2.7573188    |
| C | 3.547012788  | -1.595330011 | -0.092614017 |
| C | -4.964264658 | 5.274401513  | 2.659280692  |
| H | 3.350210078  | -2.253247293 | -0.951333941 |
| H | -5.186187393 | 6.317306189  | 2.391423671  |
| H | -5.454633794 | -3.272031735 | -0.413671778 |
| H | 4.823525752  | 7.224926845  | 1.735369363  |
| C | 6.268300579  | 2.251852108  | -0.275503277 |
| C | -7.429306444 | 1.585329031  | 1.301501139  |
| H | 0.796260564  | -0.99886796  | 0.222000713  |
| H | -2.329844487 | 5.507521045  | 1.806765669  |
| C | 4.937492097  | 2.393939633  | 0.12734709   |
| C | -6.044352736 | 1.550954485  | 1.119473645  |
| C | -5.08842343  | -2.305607337 | -0.789886324 |
| C | 4.190674576  | 6.635717807  | 1.055712233  |
| H | -5.962412687 | -1.750058404 | -1.152767963 |
| H | 4.805243587  | 6.382805301  | 0.18221529   |
| H | 1.075320491  | -2.661308183 | -0.344282132 |
| H | -2.904668194 | 7.015231017  | 2.532285737  |
| H | -8.082932199 | 1.32623445   | 0.472168349  |
| H | 6.675717366  | 2.931249304  | -1.019889416 |
| H | 3.430213183  | -0.562875813 | -0.432488408 |
| H | -4.859189166 | 4.711120626  | 1.728670385  |
| H | -2.494718333 | -1.812803353 | -2.084126373 |
| H | 1.087333964  | 6.826853134  | 0.70130288   |
| C | -5.465286126 | 1.153389315  | -0.216794973 |
| C | 4.086140412  | 3.48632984   | -0.471662946 |
| H | -4.436149532 | -2.519845663 | -1.642241421 |
| H | 3.376641093  | 7.290939048  | 0.729803478  |
| H | -6.212336282 | 0.598691166  | -0.797496007 |
| H | 4.729088138  | 4.284668118  | -0.861785836 |
| H | -1.314444149 | -0.74670785  | -1.29150485  |
| H | 0.131018536  | 5.382215775  | 1.112215606  |
| C | -2.083301867 | -0.798543937 | -2.073276377 |
| C | 0.599545471  | 5.936807222  | 0.28924335   |
| H | -5.226688211 | 2.061884912  | -0.789183476 |
| H | 3.537274264  | 3.084627406  | -1.335901611 |
| C | -3.165396187 | 0.284248201  | -1.884577624 |
| C | 1.571112622  | 5.052504282  | -0.518595207 |
| H | -1.704784854 | 1.848050339  | -1.376330431 |
| H | 0.217399068  | 3.31659804   | -0.547650645 |
| H | -1.584789376 | -0.640493565 | -3.040296834 |
| H | -0.204901247 | 6.285446192  | -0.373764463 |
| C | -2.495834012 | 1.654381907  | -2.108374899 |
| C | 0.736401241  | 3.980152514  | -1.246627613 |
| H | -4.786161945 | -0.835005325 | -2.906227884 |
| H | 2.841125232  | 6.743137422  | -1.188300207 |

|   |              |             |              |
|---|--------------|-------------|--------------|
| H | -5.006129208 | 0.925408721 | -2.912224842 |
| H | 2.959410004  | 5.302608296 | -2.216882012 |
| C | -4.261431523 | 0.121616584 | -2.95982221  |
| C | 2.279203619  | 5.899834542 | -1.596530704 |
| H | -2.047910233 | 1.667154207 | -3.112974891 |
| H | -0.022766411 | 4.478525123 | -1.866123034 |
| H | -3.210139165 | 2.48298835  | -2.063754322 |
| H | 1.350486417  | 3.374084635 | -1.922557283 |
| H | -3.791110057 | 0.181597687 | -3.952315153 |
| H | 1.516546447  | 6.314773614 | -2.271592143 |
| H | 3.381404546  | 3.084613821 | 4.919469486  |

---

**Supplementary Table 36 | Cartesian coordinate of the product complex for elimination of a terminal dinitrogen ligand trans to the NNH group in II. Units are presented in Å.**

SCF energy (in toluene) = -3963.00710453 hartree

ZPE = 1.293303 hartree

```

-----
Atom          Coordinates (Angstroms)
          X           Y           Z
-----
Mo    -2.891301886    1.870391597    1.874668552
Mo     2.263664809    1.830721043    1.847080226
P      2.630525452   -0.574090615    2.464391344
P     -3.099531237    3.431187606    3.912849801
N     -5.147550979    1.942451959    2.234405731
N      4.440876927    1.527724934    1.214582499
P      2.721635809    4.008210978    0.668236855
P     -3.825480965    0.340063683    0.001198951
N     -0.92935363    1.831325869    1.678947083
N      0.240913287    1.796831211    1.645469056
N     -2.721753866   -0.61551171    3.830611227
N     -2.773309791    0.277544739    3.133540779
N     -3.036709133    3.458971345    0.606209041
N     -3.135868901     4.34265886   -0.097451143
N      2.483400472    2.918754185    4.661965574
N      2.549078294    2.455395844    3.507343728
N      4.072921928    0.955776187   -3.135101657
N      4.149145115    0.091915234   -3.823969524
H      2.699333943   -2.946515369    5.533220509
H     -1.837901867     3.387928     7.583777961
H     -3.366679037    2.747105199    6.97912682
H      4.086029382   -2.161835998    4.778042667
C       3.0745965   -2.539046386    4.583258777
C     -2.592040391     3.50119102    6.791423661
H     -2.043015832    1.099076832    5.592165787
H      3.085819455    0.143047888    5.335368802
H     -3.040997195    4.490266587    6.910536774
H      3.149107808   -3.373020883    3.879733308
H     -0.562526258    1.814288921    6.242356251
H      1.810051966   -0.766496657    6.152590079
C      2.100935201   -0.318485611    5.191181853
C     -1.292581102    1.878727419    5.423337913
H      0.333682125   -2.290730636    4.989766368
H      0.036757329    4.072415045    5.999364869
C      2.113776883   -1.424204068    4.115586351
C     -1.900382533    3.295110061    5.426439565
H     -4.3296573     1.692697851    5.037045263
H      4.617529385   -0.09786011    3.720280797

```

|   |              |              |              |
|---|--------------|--------------|--------------|
| H | 1.3938939    | 0.482018198  | 4.957497212  |
| H | -0.766819552 | 1.660238053  | 4.488493405  |
| H | 5.001630925  | -1.436414536 | 2.643975319  |
| H | -5.169060398 | 3.213317086  | 5.335911387  |
| C | 0.685636151  | -1.990374655 | 3.992747628  |
| C | -0.742897699 | 4.299530632  | 5.260506959  |
| H | 2.237211033  | -3.743157225 | 1.989247495  |
| H | -3.010131315 | 6.176354713  | 5.613499744  |
| H | -0.023209158 | -1.24791808  | 3.608182334  |
| H | -0.269815536 | 4.218270489  | 4.274916993  |
| C | 4.494699596  | -0.464082178 | 2.690434184  |
| C | -4.669717476 | 2.622550144  | 4.558527898  |
| H | 7.080561766  | -0.462763274 | 1.938322144  |
| H | -7.377137234 | 2.602438768  | 4.692367908  |
| H | 0.640618739  | -2.880284888 | 3.354582832  |
| H | -1.05905696  | 5.336079966  | 5.417951799  |
| H | 3.906593967  | -3.282982075 | 1.588303203  |
| H | -4.668320518 | 5.53322447   | 5.598583128  |
| H | -4.934249839 | -0.929850155 | 2.458077622  |
| H | 4.459792489  | 4.122998247  | 3.005066313  |
| C | 2.863577455  | -3.233009911 | 1.250095796  |
| C | -3.901151988 | 6.03393608   | 4.994064908  |
| H | -3.436064464 | -3.32786657  | 1.045177139  |
| H | 2.632589548  | 6.715045763  | 3.346544809  |
| C | 6.533549479  | 0.360245283  | 1.485272678  |
| C | -7.021113739 | 2.32944244   | 3.702020224  |
| H | 2.796604329  | -3.809530935 | 0.315704334  |
| H | -4.287605921 | 7.034250393  | 4.74912296   |
| C | 5.17019973   | 0.508180754  | 1.75672242   |
| C | -5.646108727 | 2.286395998  | 3.457178384  |
| H | -5.521699433 | -2.500001201 | 1.901335127  |
| H | 4.927742135  | 5.829077809  | 3.144639525  |
| H | -2.599592022 | -1.890188067 | 1.646161234  |
| H | 2.078972047  | 5.032297439  | 3.432674717  |
| C | -5.332470365 | -1.462348815 | 1.591179489  |
| C | 4.625317612  | 5.044112589  | 2.4367828    |
| C | -3.115969542 | -2.309827921 | 0.778659008  |
| C | 2.27415666   | 5.864126467  | 2.748005772  |
| H | -8.990277716 | 2.061390846  | 2.850863865  |
| H | 8.238381895  | 1.174227803  | 0.436686515  |
| C | 2.399881662  | -1.788744106 | 0.985652616  |
| C | -3.605482835 | 5.284990023  | 3.678607813  |
| H | -6.301261271 | -1.021657157 | 1.329735035  |
| H | 5.467686412  | 4.882925686  | 1.752315307  |
| C | -7.916736498 | 2.027799667  | 2.678732494  |
| C | 7.175910084  | 1.270560057  | 0.65034891   |
| H | -2.395820315 | -2.398507317 | -0.040413084 |
| H | 1.327015544  | 6.165996895  | 2.28772715   |
| H | 0.260318911  | -2.218344654 | 1.343908099  |
| H | -1.559241537 | 6.094939532  | 3.490398311  |
| H | 4.291496412  | -1.24943526  | -0.028182512 |
| H | -5.763484541 | 4.947371806  | 3.375371482  |

|   |              |              |              |
|---|--------------|--------------|--------------|
| C | -4.361227438 | -1.48270762  | 0.388132559  |
| C | 3.348937943  | 5.5053263    | 1.698611076  |
| C | 0.910357562  | -1.787204669 | 0.576821374  |
| C | -2.486280938 | 6.026205745  | 2.913872559  |
| C | 3.209878696  | -1.233676764 | -0.206983997 |
| C | -4.895236445 | 5.332456862  | 2.828315332  |
| H | 3.013646365  | -1.856813664 | -1.091370758 |
| H | -5.108694215 | 6.381388595  | 2.577878607  |
| H | -5.460423209 | -3.164504043 | -0.406389303 |
| H | 4.173957786  | 7.496053851  | 1.529030176  |
| C | 6.428488408  | 2.302253195  | 0.089309519  |
| C | -7.405639386 | 1.682506828  | 1.429751716  |
| H | 0.550369547  | -0.772170204 | 0.36648437   |
| H | -2.259090554 | 5.550103788  | 1.956160944  |
| C | 5.064040758  | 2.405632175  | 0.374000675  |
| C | -6.022878998 | 1.640342904  | 1.233388207  |
| C | -5.093855617 | -2.192822476 | -0.768389847 |
| C | 3.694777489  | 6.757102225  | 0.870472118  |
| H | -5.968051518 | -1.630615732 | -1.120266823 |
| H | 4.397619312  | 6.548145424  | 0.053606188  |
| H | 0.787586244  | -2.387770733 | -0.336590042 |
| H | -2.819621984 | 7.052963113  | 2.703173047  |
| H | -8.069216569 | 1.441785897  | 0.602795497  |
| H | 6.889437928  | 3.025687587  | -0.578333748 |
| H | 2.922230746  | -0.204682526 | -0.461564182 |
| H | -4.807544578 | 4.781572343  | 1.888653168  |
| H | -2.490527006 | -1.661963824 | -2.058372699 |
| H | 0.65705907   | 6.339956908  | 0.17968481   |
| C | -5.461972706 | 1.261649976  | -0.115904552 |
| C | 4.242505575  | 3.469313999  | -0.306160884 |
| H | -4.443806456 | -2.394754593 | -1.625580606 |
| H | 2.804385439  | 7.233909776  | 0.446777046  |
| H | -6.218215931 | 0.718931633  | -0.696103073 |
| H | 4.882402305  | 4.312068166  | -0.595698742 |
| H | -1.310693683 | -0.579510198 | -1.284443471 |
| H | -0.091331804 | 4.792716403  | 0.641808834  |
| C | -2.095513769 | -0.641106483 | -2.049250799 |
| C | 0.37576099   | 5.344352157  | -0.18330696  |
| H | -5.228505963 | 2.178642269  | -0.676802918 |
| H | 3.856993526  | 3.044155038  | -1.243313448 |
| C | -3.189913585 | 0.422829222  | -1.830284158 |
| C | 1.57784325   | 4.580004044  | -0.771701263 |
| H | -1.741540032 | 1.995830905  | -1.318240015 |
| H | 0.507471203  | 2.658116374  | -0.725568009 |
| H | -1.621742002 | -0.468818504 | -3.02652436  |
| H | -0.38894232  | 5.484542048  | -0.960194562 |
| C | -2.541393955 | 1.804597596  | -2.040490188 |
| C | 1.053357963  | 3.287242444  | -1.436342655 |
| H | -4.808028951 | -0.699556756 | -2.854253945 |
| H | 2.613195982  | 6.398883835  | -1.491177959 |
| H | -5.052568553 | 1.057212086  | -2.822274522 |
| H | 3.1114525    | 4.915754394  | -2.32647976  |

|   |              |             |              |
|---|--------------|-------------|--------------|
| C | -4.297524894 | 0.265024976 | -2.894244398 |
| C | 2.262365683  | 5.432325821 | -1.860906566 |
| H | -2.107838413 | 1.838315746 | -3.050976724 |
| H | 0.362334388  | 3.556684049 | -2.247881304 |
| H | -3.264908185 | 2.623651112 | -1.973337191 |
| H | 1.8555347    | 2.686468328 | -1.887448823 |
| H | -3.840244915 | 0.351835236 | -3.890839    |
| H | 1.534018451  | 5.634065925 | -2.659911857 |
| H | 3.428982681  | 3.09464447  | 5.045905097  |

---



**Supplementary Table 37 | Cartesian coordinate of the reactant complex for protonation of IV.  
Units are presented in Å.**

SCF energy (in toluene) = -5142.20480431 hartree

ZPE = 1.474342 hartree

```

-----
Atom          Coordinates (Angstroms)
          X           Y           Z
-----
Mo    3.160798658      0.5710895    -0.068883044
Mo   -1.963312028     -0.560294953    0.076507263
P    -2.198341933     -1.669476812   -2.275643903
P     3.022235276      3.048066629     0.55634873
N     5.336829767      1.263528973   -0.210970985
N    -4.093581278     -1.219439106    0.10648629
P    -2.710712268      0.214835178    2.43146639
P     4.421310451     -1.572545176   -0.771022973
N     1.246300676      0.006998414    0.050784863
N     0.127412926     -0.279426172    0.120242033
N     2.705673903      1.352636034   -3.102656844
N     2.875184465      1.070113866   -2.015160905
N     3.399493931      0.061183487    1.900352707
N     3.510296855     -0.213178895    2.99360162
N    -2.638205396      2.172483193   -1.133249057
N    -2.350757245      1.023811958   -0.636264793
H    -1.792112998     -0.352758089   -5.91135348
H     1.307416226      6.24121724    -0.888308958
H     2.901646429      5.612355094   -1.305177764
H    -3.264740902     -0.369503941   -4.936253726
C    -2.306259183     -0.881215436   -5.095011271
C     2.153476835      5.650533516   -0.504509121
H     1.778009243      3.527342873   -2.20774532
H    -2.074188624      1.206136172   -3.313884366
H     2.580983385      6.203697659    0.335101042
H    -2.515349119     -1.89411936   -5.444893891
H     0.228543807      4.235593762   -1.751224436
H    -0.65603789      1.115433876   -4.377057829
C    -1.151963312      0.650298315   -3.512527735
C     1.0543055        3.601221872   -1.389918023
H     0.476661345     -0.895930665   -4.88397284
H    -0.335193748      4.903783242    0.443268147
C    -1.416085251     -0.831885675   -3.835260689
C     1.646663635      4.24406628    -0.120266892
H     4.106158931      3.552532502   -1.53790197
H    -3.983569452     -0.093671738   -2.563382577
H    -0.491522589      0.760978546   -2.646245957
H     0.666618513      2.595327479   -1.192845872

```

|   |              |              |              |
|---|--------------|--------------|--------------|
| H | -4.55695091  | -1.642773994 | -3.201633943 |
| H | 4.850276423  | 4.574034181  | -0.304525318 |
| C | -0.044757201 | -1.481893349 | -4.11370995  |
| C | 0.50427433   | 4.363622448  | 0.906858124  |
| H | -1.685956675 | -3.752680958 | -4.711058847 |
| H | 2.669502484  | 5.698738679  | 2.406202949  |
| H | 0.588165078  | -1.480603758 | -3.217901218 |
| H | 0.133096218  | 3.379305336  | 1.218911255  |
| C | -4.016065632 | -1.175058768 | -2.36945814  |
| C | 4.493199495  | 3.556871982  | -0.5083257   |
| H | -6.582389965 | -2.01775058  | -2.03601144  |
| H | 7.145897291  | 4.08683339   | -0.676903336 |
| H | -0.119782551 | -2.509736503 | -4.480112578 |
| H | 0.78863867   | 4.927394532  | 1.80075271   |
| H | -3.437494851 | -3.623811895 | -4.423001339 |
| H | 4.317177289  | 5.63528343   | 1.742110303  |
| H | 5.154624738  | 0.36714793   | -2.90761038  |
| H | -4.534652496 | 1.538967496  | 0.526828758  |
| C | -2.494322821 | -4.019157207 | -4.023806813 |
| C | 3.636016856  | 5.189830751  | 2.478183644  |
| H | 4.005315663  | -2.074576044 | -4.54542304  |
| H | -3.552050231 | 3.955659275  | 2.261909715  |
| C | -6.082542964 | -1.852206022 | -1.08484019  |
| C | 6.954768089  | 3.028984542  | -0.513272668 |
| H | -2.577756233 | -5.115635245 | -4.035346573 |
| H | 4.044934062  | 5.417434615  | 3.473612777  |
| C | -4.75255508  | -1.42653952  | -1.071786168 |
| C | 5.636170143  | 2.579850838  | -0.406852195 |
| H | 5.876122508  | -0.633048076 | -4.17465625  |
| H | -5.444902093 | 2.711725903  | 1.509149257  |
| H | 3.026573443  | -1.134060616 | -3.410783714 |
| H | -2.490802789 | 2.968499371  | 1.227708768  |
| C | 5.711446836  | -0.555327474 | -3.090088086 |
| C | -4.919839453 | 1.744298214  | 1.529018683  |
| C | 3.699295358  | -1.991831882 | -3.491882394 |
| C | -2.917528759 | 3.055436214  | 2.232296356  |
| H | 9.039056573  | 2.453103236  | -0.475680342 |
| H | -7.769474726 | -2.451178061 | 0.126186949  |
| C | -2.242335248 | -3.578639987 | -2.567592266 |
| C | 3.524519254  | 3.659340015  | 2.329012905  |
| H | 6.697453258  | -0.462516504 | -2.620228624 |
| H | -5.662255784 | 0.979722299  | 1.783600279  |
| C | 8.005712465  | 2.121127597  | -0.402401204 |
| C | -6.741426074 | -2.094471903 | 0.12068302   |
| H | 3.13375642   | -2.895441834 | -3.244731459 |
| H | -2.103301251 | 3.212245955  | 2.943872029  |
| H | -0.0568356   | -3.8329326   | -2.692611044 |
| H | 1.509117244  | 3.537932934  | 3.229845544  |
| H | -4.373660274 | -3.915014242 | -2.158410635 |
| H | 5.708704293  | 3.523404383  | 2.058225301  |
| C | 4.960366236  | -1.821232761 | -2.616939584 |
| C | -3.782603283 | 1.822160838  | 2.570089298  |

|   |              |              |              |
|---|--------------|--------------|--------------|
| C | -0.900705738 | -4.158562261 | -2.07376175  |
| C | 2.511817893  | 3.121381198  | 3.363961389  |
| C | -3.395700768 | -4.16689015  | -1.729777724 |
| C | 4.914262448  | 3.070019296  | 2.661759509  |
| H | -3.308460737 | -5.261532329 | -1.736464558 |
| H | 5.141806312  | 3.286041483  | 3.715630463  |
| H | 6.2377429    | -2.998185171 | -3.902449198 |
| H | -5.112203476 | 2.884139899  | 3.908067754  |
| C | -6.06513837  | -1.871173689 | 1.315447252  |
| C | 7.700571411  | 0.778001552  | -0.196492102 |
| H | -0.701515712 | -3.875530919 | -1.038386217 |
| H | 2.435027378  | 2.031073953  | 3.337604633  |
| C | -4.741297589 | -1.413732328 | 1.290876109  |
| C | 6.365470976  | 0.37255504   | -0.11342345  |
| C | 5.901971661  | -3.018780295 | -2.855072312 |
| C | -4.44343811  | 2.011185559  | 3.950766352  |
| H | 6.801837028  | -2.977130629 | -2.228557778 |
| H | -5.057373994 | 1.149110716  | 4.239616168  |
| H | -0.942629679 | -5.255785439 | -2.120505314 |
| H | 2.84975941   | 3.404110454  | 4.371792297  |
| H | 8.488317588  | 0.034203736  | -0.105073748 |
| H | -6.55061274  | -2.043240631 | 2.272540015  |
| H | -3.363793174 | -3.867510196 | -0.682728685 |
| H | 4.957923182  | 1.986283715  | 2.531190304  |
| H | 3.529309678  | -4.422449739 | -1.806390534 |
| H | -1.696380371 | 2.153682557  | 4.763522591  |
| C | 6.02576878   | -1.081297835 | 0.084211668  |
| C | -4.021425585 | -1.128867564 | 2.586921988  |
| H | 5.413296166  | -3.984654939 | -2.69411175  |
| H | -3.720784685 | 2.196401165  | 4.749890988  |
| H | 6.876678254  | -1.70925712  | -0.206239853 |
| H | -4.754582048 | -0.919978461 | 3.375857238  |
| H | 2.188449762  | -3.513229589 | -1.06703907  |
| H | -0.416935465 | 1.811134039  | 3.570910393  |
| C | 3.093505367  | -4.096774698 | -0.856322333 |
| C | -0.989931652 | 1.395900424  | 4.409848725  |
| H | 5.840954656  | -1.269813645 | 1.151756398  |
| H | -3.473222543 | -2.031892642 | 2.895735006  |
| C | 4.093073532  | -3.310280874 | 0.015345017  |
| C | -1.648885432 | 0.050310556  | 4.043112462  |
| H | 2.520003131  | -2.483545652 | 1.31180005   |
| H | 0.093194063  | -0.618981114 | 2.877132759  |
| H | 2.778242522  | -4.997737687 | -0.314374131 |
| H | -0.277552541 | 1.215192716  | 5.227109516  |
| C | 3.439187885  | -3.071388639 | 1.389035575  |
| C | -0.508612509 | -0.938615273 | 3.734991816  |
| H | 5.893222188  | -4.420031159 | -0.67040599  |
| H | -3.300040451 | 0.137590903  | 5.523887164  |
| H | 6.070110899  | -3.665840096 | 0.926237355  |
| H | -2.812269339 | -1.511162744 | 5.058457143  |
| C | 5.362510705  | -4.159415365 | 0.248567364  |
| C | -2.450259937 | -0.493835924 | 5.244005404  |

|   |              |              |              |
|---|--------------|--------------|--------------|
| H | 3.180530906  | -4.042365614 | 1.831416948  |
| H | 0.153743668  | -0.993009203 | 4.611543221  |
| H | 4.113834951  | -2.567431231 | 2.089974004  |
| H | -0.888489834 | -1.941521125 | 3.547176687  |
| H | 5.064580903  | -5.101573103 | 0.731566715  |
| H | -1.781392259 | -0.547085121 | 6.115413749  |
| S | -1.79241797  | -3.941325311 | 1.794873097  |
| O | -2.30498577  | -3.657102944 | 3.154805281  |
| O | -2.449828412 | -5.021428326 | 1.047999508  |
| O | -1.548605079 | -2.683792364 | 0.972044005  |
| C | -0.060455894 | -4.571484831 | 2.085649634  |
| F | 0.558949296  | -4.790871077 | 0.910822895  |
| F | 0.667590649  | -3.689933895 | 2.789376386  |
| F | -0.115484025 | -5.72090871  | 2.762399969  |
| C | -5.962205539 | 3.366469924  | -2.073797646 |
| N | -4.737541612 | 3.787688511  | -1.664839118 |
| C | -4.423653348 | 5.09812797   | -1.493525824 |
| C | -5.400639479 | 6.063560623  | -1.731602019 |
| C | -6.67283374  | 5.669708747  | -2.145711644 |
| C | -6.953786455 | 4.314293489  | -2.320116083 |
| H | -7.935345132 | 3.982461109  | -2.646187753 |
| H | -7.442144297 | 6.415658452  | -2.333279534 |
| H | -5.155349833 | 7.112502066  | -1.591948122 |
| C | -6.17751858  | 1.893561268  | -2.251694269 |
| H | -7.219485351 | 1.688981677  | -2.514857443 |
| H | -5.536879148 | 1.503930111  | -3.053404855 |
| H | -5.934934616 | 1.34070728   | -1.336629899 |
| C | -3.024483771 | 5.43579507   | -1.070142859 |
| H | -2.951166709 | 6.493055628  | -0.798722596 |
| H | -2.713088061 | 4.82250517   | -0.216933062 |
| H | -2.316830645 | 5.245416606  | -1.889428128 |
| H | -3.945581077 | 3.036097097  | -1.43876798  |
| H | -1.769121093 | 2.656831473  | -1.406157877 |

---

**Supplementary Table 38 | Cartesian coordinate of the transition state for protonation of IV.  
Units are presented in Å.**

SCF energy (in toluene) = -5142.20262299 hartree

ZPE = 1.471585 hartree

imaginary frequency: 537i

---

| Atom | Coordinates (Angstroms) |              |              |
|------|-------------------------|--------------|--------------|
|      | X                       | Y            | Z            |
| Mo   | 3.154649901             | 0.500927421  | -0.06880634  |
| Mo   | -1.993262882            | -0.505088168 | 0.05806155   |
| P    | -2.231402687            | -1.607259229 | -2.301379536 |
| P    | 3.074149155             | 2.974492595  | 0.585762497  |
| N    | 5.347696133             | 1.147857442  | -0.205961381 |
| N    | -4.129487925            | -1.147410873 | 0.080999696  |
| P    | -2.737167216            | 0.268035649  | 2.420349745  |
| P    | 4.372173815             | -1.664018333 | -0.794665576 |
| N    | 1.228160883             | -0.012995619 | 0.044976348  |
| N    | 0.10016882              | -0.265769931 | 0.109502562  |
| N    | 2.714291868             | 1.323505284  | -3.094176489 |
| N    | 2.879467522             | 1.026308472  | -2.010120863 |
| N    | 3.382876889             | -0.035589288 | 1.894848032  |
| N    | 3.488496245             | -0.324977848 | 2.984541302  |
| N    | -2.583131882            | 2.26108672   | -1.125546694 |
| N    | -2.352913204            | 1.090030151  | -0.641498649 |
| H    | -1.81443358             | -0.27748375  | -5.930245389 |
| H    | 1.427053884             | 6.220207482  | -0.817626088 |
| H    | 3.007993694             | 5.563921501  | -1.242497172 |
| H    | -3.288492668            | -0.292912862 | -4.957646784 |
| C    | -2.331603027            | -0.807440184 | -5.116844066 |
| C    | 2.260614863             | 5.607495526  | -0.441364225 |
| H    | 1.841302495             | 3.514299601  | -2.171314012 |
| H    | -2.097076999            | 1.271484728  | -3.325249858 |
| H    | 2.699194078             | 6.141164716  | 0.405066705  |
| H    | -2.543812063            | -1.818083201 | -5.4710748   |
| H    | 0.307656762             | 4.250050525  | -1.706172578 |
| H    | -0.681398762            | 1.182520694  | -4.390510559 |
| C    | -1.176259478            | 0.714581461  | -3.526938162 |
| C    | 1.119020202             | 3.593320063  | -1.352675971 |
| H    | 0.451797818             | -0.830364126 | -4.900134212 |
| H    | -0.241282362            | 4.903942479  | 0.500001377  |
| C    | -1.443080752            | -0.765663067 | -3.855530546 |
| C    | 1.724432103             | 4.207120752  | -0.074772012 |
| H    | 4.165280678             | 3.4784205    | -1.504812626 |
| H    | -4.014071537            | -0.029352485 | -2.597188523 |

---

|   |              |              |              |
|---|--------------|--------------|--------------|
| H | -0.513698869 | 0.8206412    | -2.661675529 |
| H | 0.710198485  | 2.5933257    | -1.168440667 |
| H | -4.585768723 | -1.58060106  | -3.227179131 |
| H | 4.933372789  | 4.468824189  | -0.260874361 |
| C | -0.072765545 | -1.417974191 | -4.133322147 |
| C | 0.585293533  | 4.337532651  | 0.954653179  |
| H | -1.714546064 | -3.680062237 | -4.742964482 |
| H | 2.782614197  | 5.609032511  | 2.46753048   |
| H | 0.558119118  | -1.421372932 | -3.23614494  |
| H | 0.191588534  | 3.357383595  | 1.252257982  |
| C | -4.046310645 | -1.109022328 | -2.396510641 |
| C | 4.553842406  | 3.462201613  | -0.475924891 |
| H | -6.616909066 | -1.933990765 | -2.067405466 |
| H | 7.216570803  | 3.936310896  | -0.644223087 |
| H | -0.14930674  | -2.444197241 | -4.503827048 |
| H | 0.883114168  | 4.881068708  | 1.856606063  |
| H | -3.467594098 | -3.552062351 | -4.463278285 |
| H | 4.427160678  | 5.517568483  | 1.798852621  |
| H | 5.142686519  | 0.28389773   | -2.908200229 |
| H | -4.539081047 | 1.626385876  | 0.521386584  |
| C | -2.526288019 | -3.948689487 | -4.060758459 |
| C | 3.737979238  | 5.078493945  | 2.531259306  |
| H | 3.939634583  | -2.11694926  | -4.572705892 |
| H | -3.538768095 | 4.018979725  | 2.27149342   |
| C | -6.11841619  | -1.770794699 | -1.115198597 |
| C | 7.002976242  | 2.881115019  | -0.491752552 |
| H | -2.610227922 | -5.045078533 | -4.07698251  |
| H | 4.153836262  | 5.285386591  | 3.528295854  |
| C | -4.78592377  | -1.353670697 | -1.099072921 |
| C | 5.675155033  | 2.459358744  | -0.387661918 |
| H | 5.83882722   | -0.715377884 | -4.190139023 |
| H | -5.440871472 | 2.799925737  | 1.508259956  |
| H | 2.982901944  | -1.168475543 | -3.426023128 |
| H | -2.47448908  | 3.028326317  | 1.244961227  |
| C | 5.679344277  | -0.647728447 | -3.104152272 |
| C | -4.924688301 | 1.828066158  | 1.524035242  |
| C | 3.637645495  | -2.038938445 | -3.517672987 |
| C | -2.911419775 | 3.113952253  | 2.245181812  |
| H | 9.07432516   | 2.259972553  | -0.46458076  |
| H | -7.813573153 | -2.35356565  | 0.091681464  |
| C | -2.281097527 | -3.515067588 | -2.601263457 |
| C | 3.592612889  | 3.552607931  | 2.36475172   |
| H | 6.668585704  | -0.581470081 | -2.636595156 |
| H | -5.674582319 | 1.067962995  | 1.769695441  |
| C | 8.034174259  | 1.949644545  | -0.392831583 |
| C | -6.782807312 | -2.004830628 | 0.088658647  |
| H | 3.054243467  | -2.933331204 | -3.278490887 |
| H | -2.103507754 | 3.260625151  | 2.965939567  |
| H | -0.095914022 | -3.771860788 | -2.713196288 |
| H | 1.575936034  | 3.464203907  | 3.266884372  |
| H | -4.416155393 | -3.844325069 | -2.206596412 |
| H | 5.772856707  | 3.371496113  | 2.088478121  |

|   |              |              |              |
|---|--------------|--------------|--------------|
| C | 4.903585067  | -1.903440279 | -2.643833438 |
| C | -3.790238132 | 1.886795615  | 2.568836273  |
| C | -0.944259262 | -4.1005739   | -2.10209491  |
| C | 2.569843945  | 3.025524217  | 3.39546663   |
| C | -3.441845523 | -4.101779111 | -1.772897197 |
| C | 4.969455169  | 2.928790625  | 2.688058893  |
| H | -3.359126155 | -5.196763471 | -1.783418503 |
| H | 5.203284496  | 3.127540108  | 3.743919877  |
| H | 6.154406727  | -3.091192599 | -3.94504817  |
| H | -5.111527513 | 2.951637381  | 3.911971015  |
| C | -6.108885036 | -1.783669301 | 1.285009071  |
| C | 7.700396285  | 0.61136255   | -0.200699366 |
| H | -0.751499311 | -3.823876592 | -1.063733257 |
| H | 2.47022118   | 1.937402206  | 3.358807379  |
| C | -4.781758076 | -1.335787342 | 1.263886189  |
| C | 6.356908583  | 0.234101305  | -0.119618872 |
| C | 5.820169985  | -3.117112379 | -2.89731439  |
| C | -4.453248306 | 2.070614296  | 3.94929052   |
| H | 6.721844753  | -3.100919268 | -2.272283239 |
| H | -5.078566856 | 1.213564563  | 4.228388839  |
| H | -0.987282263 | -5.197402654 | -2.156388783 |
| H | 2.914823681  | 3.291308544  | 4.405495088  |
| H | 8.47197381   | -0.150229997 | -0.118553552 |
| H | -6.598670286 | -1.950352595 | 2.240831231  |
| H | -3.415608272 | -3.806768211 | -0.72455987  |
| H | 4.988954848  | 1.845893449  | 2.545059801  |
| H | 3.420129138  | -4.485434075 | -1.855163005 |
| H | -1.709139312 | 2.178183946  | 4.770029574  |
| C | 5.986502192  | -1.213894603 | 0.063739563  |
| C | -4.064609202 | -1.059242161 | 2.563573838  |
| H | 5.312199638  | -4.074679905 | -2.746677857 |
| H | -3.731341192 | 2.240407208  | 4.752556713  |
| H | 6.823582434  | -1.856732934 | -0.234061868 |
| H | -4.799588917 | -0.841645245 | 3.34831545   |
| H | 2.100354886  | -3.556584838 | -1.102613188 |
| H | -0.431163621 | 1.836732422  | 3.575563942  |
| C | 2.994013949  | -4.1602348   | -0.900520949 |
| C | -1.008329833 | 1.418357661  | 4.410077595  |
| H | 5.798994742  | -1.409193116 | 1.129586795  |
| H | -3.530709131 | -1.969630568 | 2.875239927  |
| C | 4.012195219  | -3.402678158 | -0.024896757 |
| C | -1.676751337 | 0.08107248   | 4.030595822  |
| H | 2.461322875  | -2.55758441  | 1.286400092  |
| H | 0.062426906  | -0.588571433 | 2.861403426  |
| H | 2.662375939  | -5.059924287 | -0.366191346 |
| H | -0.298404458 | 1.224764177  | 5.226489329  |
| C | 3.368983773  | -3.164070615 | 1.353830164  |
| C | -0.542648872 | -0.912525773 | 3.715280384  |
| H | 5.787442969  | -4.540913936 | -0.728817107 |
| H | -3.331302522 | 0.166516908  | 5.507395624  |
| H | 5.984797952  | -3.80770016  | 0.875201736  |
| H | -2.851355494 | -1.481434777 | 5.030691833  |

|   |              |              |              |
|---|--------------|--------------|--------------|
| C | 5.265184899  | -4.279464429 | 0.194702092  |
| C | -2.484322917 | -0.467656182 | 5.225222998  |
| H | 3.093438237  | -4.134011594 | 1.788299319  |
| H | 0.118039717  | -0.979491532 | 4.592230837  |
| H | 4.056504509  | -2.680235274 | 2.056503386  |
| H | -0.928417639 | -1.911112944 | 3.517784935  |
| H | 4.949784014  | -5.220515716 | 0.668623349  |
| H | -1.818116058 | -0.530993863 | 6.097949575  |
| S | -1.878004001 | -3.890382961 | 1.77293125   |
| O | -2.381530445 | -3.601293536 | 3.135030495  |
| O | -2.558370425 | -4.954192775 | 1.023493847  |
| O | -1.611965143 | -2.633797547 | 0.954142281  |
| C | -0.158437882 | -4.555206442 | 2.06003324   |
| F | 0.454517694  | -4.787266572 | 0.884336399  |
| F | 0.58779623   | -3.688276365 | 2.762655742  |
| F | -0.236177431 | -5.703070287 | 2.736892961  |
| C | -5.826412434 | 3.474712813  | -2.052049203 |
| N | -4.596667712 | 3.86556426   | -1.633678374 |
| C | -4.280333637 | 5.171114029  | -1.440576066 |
| C | -5.246400964 | 6.153744917  | -1.658167683 |
| C | -6.523161333 | 5.782683631  | -2.077515984 |
| C | -6.813641055 | 4.433801118  | -2.278657558 |
| H | -7.797794936 | 4.11570967   | -2.611202916 |
| H | -7.285896546 | 6.539306476  | -2.248774953 |
| H | -4.989386283 | 7.197228015  | -1.498746453 |
| C | -6.063647723 | 2.009462909  | -2.272123016 |
| H | -7.116099763 | 1.821864596  | -2.50544794  |
| H | -5.457413757 | 1.64348257   | -3.111192188 |
| H | -5.7951192   | 1.42228799   | -1.386696617 |
| C | -2.878877743 | 5.500772722  | -1.012064458 |
| H | -2.793758032 | 6.562696843  | -0.762649174 |
| H | -2.582482079 | 4.905450655  | -0.141162445 |
| H | -2.16542076  | 5.284356927  | -1.819616775 |
| H | -3.758130795 | 3.055913267  | -1.397567138 |
| H | -1.699268308 | 2.720960492  | -1.385974066 |

---



**Supplementary Table 39 | Cartesian coordinate of the product complex for protonation of IV.  
Units are presented in Å.**

SCF energy (in toluene) = -5142.21833182 hartree

ZPE = 1.476087 hartree

```

-----
Atom          Coordinates (Angstroms)
          X           Y           Z
-----
Mo      3.153544859   0.543933102   0.004532361
Mo     -1.947133053  -0.500454003   0.248402179
P      -2.291335435  -1.500804232  -2.182243582
P       3.036953631   3.005906401   0.724675169
N       5.326984365   1.247519101  -0.176049063
N      -4.095683236  -1.134646471   0.306183341
P      -2.63973349   0.194279156   2.667982601
P       4.403738242  -1.582339241  -0.812000454
N       1.25317507  -0.008055086   0.167748754
N       0.12874594  -0.284623376   0.250404603
N       2.592813509   1.398319684  -2.996190968
N       2.802865657   1.092178857  -1.923480314
N       3.46880915  -0.029902021   1.943421364
N       3.628095371  -0.348336726   3.017828444
N      -2.454486612   2.380615074  -0.689604239
N      -2.308679873   1.117028803  -0.358134121
H      -2.013380993   0.023732747  -5.741394924
H       1.245215549   6.228246669  -0.537535475
H       2.839219827   5.646088777  -1.022603726
H      -3.456545208  -0.09083338   -4.73052171
C      -2.490983837  -0.566776054  -4.94576411
C       2.110209752   5.635915269  -0.203309456
H       1.741663647   3.57677716   -1.987484826
H      -2.25961399   1.425400268  -3.098439642
H       2.548757261   6.157770676   0.650076282
H      -2.68218802  -1.561686172  -5.350918495
H       0.193735569   4.248074827  -1.479081285
H      -0.847371014   1.413372884  -4.165287305
C      -1.324009793   0.899375323  -3.317901861
C       1.030481993   3.608525696  -1.156042929
H       0.302720719  -0.552921575  -4.807202112
H      -0.356004292   4.783510595   0.764124194
C      -1.565576354   -0.569408    -3.710675601
C       1.633835262   4.205671991   0.129327513
H       4.066627764   3.592543999  -1.376582178
H      -4.091109161   0.101512565  -2.326976112
H      -0.657100687   0.984119287  -2.45413677
H       0.664888102   2.58783589   -0.993383103

```

|   |              |              |              |
|---|--------------|--------------|--------------|
| H | -4.676627204 | -1.424288183 | -2.995742498 |
| H | 4.838169656  | 4.559605612  | -0.119012395 |
| C | -0.19233506  | -1.182754953 | -4.054706888 |
| C | 0.513228812  | 4.256925055  | 1.185728704  |
| H | -1.849122096 | -3.455610031 | -4.736471161 |
| H | 2.715135537  | 5.575129412  | 2.681173778  |
| H | 0.462235596  | -1.218789403 | -3.175107438 |
| H | 0.182836539  | 3.251930272  | 1.478479757  |
| C | -4.104348957 | -0.986538494 | -2.169199477 |
| C | 4.477477135  | 3.552054256  | -0.357215668 |
| H | -6.660690939 | -1.812932319 | -1.785659996 |
| H | 7.126714122  | 4.088159563  | -0.561945636 |
| H | -0.266255736 | -2.191854751 | -4.4705406   |
| H | 0.806561267  | 4.80008803   | 2.089154279  |
| H | -3.593401893 | -3.321924902 | -4.404933826 |
| H | 4.35027103   | 5.552955521  | 1.980672482  |
| H | 5.068286847  | 0.436702669  | -2.893345786 |
| H | -4.49868538  | 1.656642904  | 0.861229743  |
| C | -2.647225367 | -3.747786415 | -4.047604396 |
| C | 3.687452162  | 5.073074951  | 2.712051315  |
| H | 3.881735956  | -1.938667414 | -4.588620238 |
| H | -3.460121952 | 3.947787121  | 2.70548353   |
| C | -6.128398547 | -1.695852973 | -0.845293787 |
| C | 6.938133371  | 3.024560112  | -0.438135395 |
| H | -2.744379988 | -4.840978974 | -4.114012485 |
| H | 4.116179354  | 5.263427871  | 3.706818809  |
| C | -4.793091164 | -1.287276506 | -0.856508661 |
| C | 5.62172906   | 2.571139895  | -0.322891694 |
| H | 5.763074691  | -0.511893594 | -4.213911419 |
| H | -5.363857263 | 2.763962984  | 1.941739542  |
| H | 2.924492919  | -1.066108499 | -3.383559439 |
| H | -2.400558036 | 3.031257621  | 1.622028407  |
| C | 5.624711116  | -0.474858708 | -3.123823531 |
| C | -4.84677854  | 1.794562811  | 1.88805848   |
| C | 3.60660806   | -1.90871919  | -3.523900646 |
| C | -2.822329798 | 3.054257973  | 2.630557354  |
| H | 9.021992237  | 2.448265328  | -0.465918894 |
| H | -7.788479612 | -2.30819457  | 0.393587667  |
| C | -2.358294491 | -3.390299344 | -2.575388341 |
| C | 3.583758185  | 3.547936826  | 2.506293282  |
| H | 6.620827854  | -0.394739345 | -2.673821013 |
| H | -5.590106838 | 1.020548344  | 2.110340017  |
| C | 7.990242646  | 2.113114767  | -0.385405205 |
| C | -6.754550535 | -1.970094297 | 0.369386666  |
| H | 3.062639017  | -2.83126984  | -3.3007662   |
| H | -2.009593381 | 3.175968982  | 3.35091455   |
| H | -0.176376942 | -3.634219374 | -2.760451615 |
| H | 1.596498541  | 3.389145619  | 3.461887319  |
| H | -4.483254432 | -3.725532515 | -2.1326821   |
| H | 5.763911767  | 3.444191443  | 2.182153096  |
| C | 4.89149254   | -1.760821743 | -2.679230305 |
| C | -3.686608952 | 1.805462744  | 2.907136008  |

|   |              |              |              |
|---|--------------|--------------|--------------|
| C | -1.008521306 | -4.005542316 | -2.150640948 |
| C | 2.601648396  | 2.96579423   | 3.547072849  |
| C | -3.498482695 | -4.011748713 | -1.743268296 |
| C | 4.986142527  | 2.956572273  | 2.780677491  |
| H | -3.425342446 | -5.105162323 | -1.814280679 |
| H | 5.234622747  | 3.128473968  | 3.837690197  |
| H | 6.138193182  | -2.886827736 | -4.038106172 |
| H | -4.975982485 | 2.794410558  | 4.330517163  |
| C | -6.03955092  | -1.800268963 | 1.550211762  |
| C | 7.689541425  | 0.762851051  | -0.226677112 |
| H | -0.785867702 | -3.805207815 | -1.100878544 |
| H | 2.522170548  | 1.877517886  | 3.479075258  |
| C | -4.710377065 | -1.363273888 | 1.501748434  |
| C | 6.356137718  | 0.353690771  | -0.133261755 |
| C | 5.832031234  | -2.944020326 | -2.983196767 |
| C | -4.315065828 | 1.915441805  | 4.312149751  |
| H | 6.748388226  | -2.916696725 | -2.380552803 |
| H | -4.931898956 | 1.045000236  | 4.568222248  |
| H | -1.053821677 | -5.095732499 | -2.28058629  |
| H | 2.970411034  | 3.2063905    | 4.554939545  |
| H | 8.479391004  | 0.01731606   | -0.178742816 |
| H | -6.49973258  | -1.99726131  | 2.514825235  |
| H | -3.438511507 | -3.77220545  | -0.682089514 |
| H | 5.037789889  | 1.879890623  | 2.601847883  |
| H | 3.500903615  | -4.402282412 | -1.926012623 |
| H | -1.524906471 | 1.989245904  | 5.05946249   |
| C | 6.024616231  | -1.107980828 | 0.019848811  |
| C | -3.94618348  | -1.148243608 | 2.785119771  |
| H | 5.35292992   | -3.917191129 | -2.839926251 |
| H | -3.572991821 | 2.053516652  | 5.10377013   |
| H | 6.872782039  | -1.719759299 | -0.310716697 |
| H | -4.651517853 | -0.974559411 | 3.606052906  |
| H | 2.174853996  | -3.508079072 | -1.142744751 |
| H | -0.295815774 | 1.694873747  | 3.804022446  |
| C | 3.079381352  | -4.102093792 | -0.961151897 |
| C | -0.841151057 | 1.243406662  | 4.64241905   |
| H | 5.868013209  | -1.334133642 | 1.084860491  |
| H | -3.398910093 | -2.070499379 | 3.02964046   |
| C | 4.094935972  | -3.346640935 | -0.080495314 |
| C | -1.534940789 | -0.07178031  | 4.234823078  |
| H | 2.551553251  | -2.567620217 | 1.279202773  |
| H | 0.154500287  | -0.732761951 | 2.989343415  |
| H | 2.768092047  | -5.017917033 | -0.442086086 |
| H | -0.101883431 | 1.012643925  | 5.42218791   |
| C | 3.471374974  | -3.157870822 | 1.314861687  |
| C | -0.427104413 | -1.071142912 | 3.853516426  |
| H | 5.885436846  | -4.417250286 | -0.845523137 |
| H | -3.138661798 | -0.010380337 | 5.766283903  |
| H | 6.087237941  | -3.73763128  | 0.78191444   |
| H | -2.719049862 | -1.647853804 | 5.205884969  |
| C | 5.37003246   | -4.200480321 | 0.093129193  |
| C | -2.318810909 | -0.652857135 | 5.43049315   |

|   |              |              |              |
|---|--------------|--------------|--------------|
| H | 3.221935763  | -4.144178171 | 1.728279575  |
| H | 0.261337652  | -1.172041004 | 4.705432759  |
| H | 4.162344584  | -2.679455748 | 2.017747845  |
| H | -0.832944069 | -2.059246486 | 3.642952523  |
| H | 5.081539157  | -5.164368138 | 0.53694178   |
| H | -1.626120373 | -0.769987519 | 6.276360082  |
| S | -1.794485586 | -3.932513599 | 1.78905173   |
| O | -2.28240069  | -3.751793002 | 3.172888263  |
| O | -2.457108946 | -4.951218195 | 0.966908085  |
| O | -1.577445531 | -2.606438729 | 1.061525784  |
| C | -0.050428015 | -4.565331422 | 1.99203578   |
| F | 0.5380873    | -4.693936349 | 0.788978139  |
| F | 0.689327039  | -3.731461089 | 2.738487433  |
| F | -0.085538078 | -5.759871645 | 2.584727602  |
| C | -5.904254269 | 3.428408454  | -2.52935725  |
| N | -4.57231706  | 3.639833041  | -2.472123279 |
| C | -4.026762826 | 4.602509359  | -3.245962843 |
| C | -4.798969676 | 5.378172105  | -4.118668305 |
| C | -6.172541331 | 5.154399619  | -4.188207435 |
| C | -6.73460635  | 4.168363049  | -3.38016384  |
| H | -7.803709283 | 3.970949551  | -3.400425563 |
| H | -6.796058478 | 5.743163526  | -4.858351509 |
| H | -4.325057525 | 6.144166867  | -4.727820397 |
| C | -6.473119879 | 2.366292868  | -1.622583081 |
| H | -7.55563702  | 2.265444521  | -1.756158101 |
| H | -6.01336797  | 1.388835731  | -1.818503301 |
| H | -6.279362322 | 2.610247767  | -0.570072147 |
| C | -2.53822047  | 4.823678742  | -3.126053298 |
| H | -2.20100476  | 5.631487388  | -3.784143591 |
| H | -2.269604989 | 5.094944061  | -2.095302716 |
| H | -1.980186295 | 3.915780198  | -3.391610845 |
| H | -3.289576066 | 2.663430688  | -1.241406448 |
| H | -1.588545365 | 2.836300562  | -0.983778172 |

-----

**Supplementary Table 40 | Cartesian coordinate of the reactant complex for protonation of V.  
Units are presented in Å.**

SCF energy (in toluene) = -5142.76298601 hartree

ZPE = 1.486976 hartree

```

-----
Atom          Coordinates (Angstroms)
          X           Y           Z
-----
Mo    -3.149402713    0.420766827    0.02396704
Mo     1.997880702   -0.355821831    0.095769749
P      2.220975083   -1.503612389    2.497478942
P     -3.411488849    2.973931214   -0.125872433
N     -5.416131898    0.716219723    0.016843084
N      4.143722218   -1.026548593    0.082493022
P      2.734070925    0.362049674   -2.289040295
P     -4.065650379   -2.004013786    0.170308959
N     -1.162284024    0.146051537    0.014873031
N     -0.007568151   -0.012967307    0.021338258
N     -3.062217663    0.624749637    3.183174259
N     -3.104292093    0.551110377    2.050550188
N     -3.152871415    0.281972147   -2.014031823
N     -3.149374338    0.211577915   -3.14485736
N      1.753321476     2.48653866     0.992870937
N      2.405792925     1.241273226     0.891960779
H      1.953361183   -0.192357778     6.149168817
H     -2.466580852     6.045016555     2.088789057
H     -3.936765977     5.077453102     2.192877453
H      3.403414722   -0.269908445     5.142828776
C      2.424167149   -0.734817549     5.315849306
C     -3.150053776     5.40944562     1.505292058
H     -2.532522603     3.081031771     2.805195281
H      2.27520706     1.350232614     3.500836227
H     -3.608501071     6.041780304     0.740865268
H      2.589622126   -1.760541629     5.649553564
H     -1.095413997     4.098281633     2.68470661
H      0.935070024     1.367912935     4.667731592
C      1.326768433     0.868451601     3.769529309
C     -1.762791644     3.435058287     2.112558722
H     -0.359853925   -0.575708599     5.168914719
H     -0.483243632     5.294413733     0.752894971
C      1.510873099   -0.628574455     4.075470193
C     -2.352169736     4.221393962     0.925189068

```

|   |              |              |              |
|---|--------------|--------------|--------------|
| H | -4.75755407  | 2.866651804  | 1.869578644  |
| H | 4.076342403  | -0.008974724 | 2.806251076  |
| H | 0.608241922  | 1.015134987  | 2.956937781  |
| H | -1.19193874  | 2.560770394  | 1.780153677  |
| H | 4.577576747  | -1.607013196 | 3.373680658  |
| H | -5.554900883 | 3.978143094  | 0.755736336  |
| C | 0.106622124  | -1.190322001 | 4.385739097  |
| C | -1.175257391 | 4.756682072  | 0.087394988  |
| H | 1.603557631  | -3.558833655 | 4.949172814  |
| H | -3.387744301 | 5.955740737  | -1.399528204 |
| H | -0.548092078 | -1.148512492 | 3.506590245  |
| H | -0.613104324 | 3.949668153  | -0.401207436 |
| C | 4.053877537  | -1.080773617 | 2.566600748  |
| C | -5.040003489 | 3.011925874  | 0.816774678  |
| H | 6.580206683  | -1.981474794 | 2.224852106  |
| H | -7.747539001 | 3.068375015  | 0.721180449  |
| H | 0.126337679  | -2.220669862 | 4.751115739  |
| H | -1.491685711 | 5.462440765  | -0.68651199  |
| H | 3.357206506  | -3.542430708 | 4.642117465  |
| H | -5.055975532 | 5.487355924  | -1.000679152 |
| H | -5.292590917 | -0.653160576 | 2.52326146   |
| H | 4.454702902  | 1.830551747  | -0.407919073 |
| C | 2.385540697  | -3.870221422 | 4.250544867  |
| C | -4.22579362  | 5.318160168  | -1.698664497 |
| H | -3.927092858 | -3.164612384 | 3.817033247  |
| H | 3.482489543  | 4.128927005  | -2.267474897 |
| C | 6.100760899  | -1.763175512 | 1.273833309  |
| C | -7.351759494 | 2.106938251  | 0.402813832  |
| H | 2.397757346  | -4.96986505  | 4.252491854  |
| H | -4.55999623  | 5.671067115  | -2.685306984 |
| C | 4.782933002  | -1.30405845  | 1.257250015  |
| C | -5.969963525 | 1.90360337   | 0.396746966  |
| H | -5.969226213 | -1.978424438 | 3.478469559  |
| H | 5.358328575  | 2.98521971   | -1.42436212  |
| H | -3.005660558 | -1.902676444 | 2.986383805  |
| H | 2.363777468  | 3.168345493  | -1.270951383 |
| C | -5.712510192 | -1.659777802 | 2.457883844  |
| C | 4.861248442  | 2.003596934  | -1.40934708  |
| C | -3.539848735 | -2.845385047 | 2.838087713  |
| C | 2.854856458  | 3.224600911  | -2.247698215 |
| H | -9.281966675 | 1.222817253  | -0.010042937 |
| H | 7.806018391  | -2.318058452 | 0.067718752  |
| C | 2.151557744  | -3.405579568 | 2.798828054  |
| C | -3.845189712 | 3.827656911  | -1.811814303 |
| H | -6.648551188 | -1.608443067 | 1.890146612  |
| H | 5.633916006  | 1.250790771  | -1.601310789 |
| C | -8.203438306 | 1.081685013  | -0.00255677  |

|   |              |              |              |
|---|--------------|--------------|--------------|
| C | 6.782730759  | -1.948329094 | 0.072237454  |
| H | -2.819541765 | -3.59930016  | 2.508649735  |
| H | 2.087236325  | 3.347831547  | -3.015125464 |
| H | -0.050817015 | -3.463807949 | 2.902394423  |
| H | -1.770775104 | 4.244846365  | -2.453985846 |
| H | 4.250407187  | -3.890119509 | 2.376728144  |
| H | -5.982489911 | 3.282894419  | -1.860947676 |
| C | -4.72515212  | -2.687426326 | 1.85963212   |
| C | 3.753600404  | 1.99388906   | -2.485130782 |
| C | 0.769262176  | -3.886490945 | 2.31150807   |
| C | -2.649304323 | 3.67875827   | -2.779694476 |
| C | 3.25488654   | -4.060981632 | 1.946969089  |
| C | -5.063548968 | 3.101921487  | -2.429931854 |
| H | 3.09080543   | -5.147807184 | 1.936082838  |
| H | -5.22486891  | 3.499138855  | -3.44236843  |
| H | -5.907273677 | -4.269528324 | 2.737122772  |
| H | 5.06155995   | 3.026271505  | -3.865081825 |
| C | 6.130278105  | -1.65644133  | -1.119772256 |
| C | -7.638769572 | -0.128226328 | -0.397878391 |
| H | 0.614778087  | -3.627849612 | 1.260833744  |
| H | -2.354524647 | 2.63367333   | -2.912435735 |
| C | 4.808931868  | -1.197082242 | -1.09529378  |
| C | -6.25065892  | -0.290490621 | -0.373018758 |
| C | -5.479013147 | -4.028719433 | 1.752886954  |
| C | 4.438477726  | 2.11940694   | -3.862213359 |
| H | -6.313587072 | -3.984466471 | 1.041602668  |
| H | 5.103476873  | 1.274673865  | -4.077566078 |
| H | 0.714189725  | -4.980439882 | 2.40109134   |
| H | -2.938760464 | 4.068431868  | -3.766597957 |
| H | -8.264192924 | -0.955944796 | -0.723106187 |
| H | 6.627235743  | -1.796634448 | -2.07610971  |
| H | 3.2653821    | -3.732034093 | 0.908740789  |
| H | -4.920737846 | 2.022838723  | -2.521133541 |
| H | -2.843276809 | -4.84724543  | 0.791220945  |
| H | 1.720787776  | 2.144474858  | -4.754651087 |
| C | -5.636996093 | -1.602394729 | -0.783772546 |
| C | 4.114094148  | -0.90744282  | -2.409378885 |
| H | -4.82953906  | -4.863440664 | 1.47250716   |
| H | 3.728477641  | 2.209601532  | -4.688769462 |
| H | -6.388402797 | -2.399453612 | -0.731478908 |
| H | 4.862678281  | -0.626442269 | -3.159831547 |
| H | -1.590056242 | -3.632283412 | 0.442651782  |
| H | 0.449019746  | 1.939060255  | -3.521994392 |
| C | -2.353553274 | -4.278959657 | -0.005971828 |
| C | 0.999979922  | 1.438994654  | -4.329174548 |
| H | -5.314528304 | -1.540075171 | -1.833383924 |
| H | 3.653322132  | -1.82872652  | -2.78604886  |

|   |              |              |              |
|---|--------------|--------------|--------------|
| C | -3.349601108 | -3.474056434 | -0.863110277 |
| C | 1.629778554  | 0.108452318  | -3.863863117 |
| H | -1.776098193 | -2.196925274 | -1.714326323 |
| H | -0.143652833 | -0.366071182 | -2.663285328 |
| H | -1.830556519 | -4.997783655 | -0.646665327 |
| H | 0.271222988  | 1.208091157  | -5.118603879 |
| C | -2.572048686 | -2.869694861 | -2.04896077  |
| C | 0.45929513   | -0.812422933 | -3.461008912 |
| H | -5.02717464  | -4.914501204 | -0.66930753  |
| H | 3.286647568  | 0.04284302   | -5.334598837 |
| H | -5.103845466 | -3.906965537 | -2.129615922 |
| H | 2.719364481  | -1.558829684 | -4.786399747 |
| C | -4.425840853 | -4.420404132 | -1.436935164 |
| C | 2.408063236  | -0.537810578 | -5.029115698 |
| H | -2.103972197 | -3.683878646 | -2.617457172 |
| H | -0.190015637 | -0.947428348 | -4.338587956 |
| H | -3.222534707 | -2.322467067 | -2.739813584 |
| H | 0.799763589  | -1.797634075 | -3.142576916 |
| H | -3.920510172 | -5.208535639 | -2.013668788 |
| H | 1.740994738  | -0.603419483 | -5.901208623 |
| S | 2.329702468  | -3.723755405 | -1.707434426 |
| O | 2.281089867  | -3.424820968 | -3.157002035 |
| O | 3.636744661  | -4.162270546 | -1.183226277 |
| O | 1.646173079  | -2.672271143 | -0.849048929 |
| C | 1.224877923  | -5.222089975 | -1.566348773 |
| F | 1.005102014  | -5.554276002 | -0.282080861 |
| F | 0.036952571  | -4.984441363 | -2.15236362  |
| F | 1.805705684  | -6.254539044 | -2.181289596 |
| C | 4.956983233  | 4.243002292  | 1.750806706  |
| N | 3.823447417  | 4.67504263   | 1.108485177  |
| C | 3.71821857   | 5.900365293  | 0.499324698  |
| C | 4.825062763  | 6.732788206  | 0.499891277  |
| C | 6.018195018  | 6.319579668  | 1.113260839  |
| C | 6.07154156   | 5.070950393  | 1.743155541  |
| H | 6.97620481   | 4.735643637  | 2.24281953   |
| H | 6.88990963   | 6.968807567  | 1.107244692  |
| H | 4.7517713    | 7.705712746  | 0.02208426   |
| C | 4.892359031  | 2.925050819  | 2.454730907  |
| H | 5.900336965  | 2.542983899  | 2.645868162  |
| H | 4.388305607  | 3.03632559   | 3.427384907  |
| H | 4.31970736   | 2.180669791  | 1.875715616  |
| C | 2.392143226  | 6.269948447  | -0.09396659  |
| H | 2.481212326  | 7.183578404  | -0.689328274 |
| H | 2.00099693   | 5.471760234  | -0.736307093 |
| H | 1.64889527   | 6.452743044  | 0.69545652   |
| H | 3.035684679  | 3.996340621  | 1.008281217  |
| H | 1.57232267   | 2.661695437  | 1.988395341  |



H 0.829648488 2.443052918 0.539934561

---

**Supplementary Table 41 | Cartesian coordinate of the transition state for protonation of V.  
Units are presented in Å.**

SCF energy (in toluene) = -5142.75689633 hartree

ZPE = 1.483863 hartree

imaginary frequency: 1073i

---

| Atom | Coordinates (Angstroms) |              |              |
|------|-------------------------|--------------|--------------|
|      | X                       | Y            | Z            |
| Mo   | -3.166950834            | 0.264719998  | 0.037267371  |
| Mo   | 2.029435834             | -0.195665343 | 0.086184158  |
| P    | 2.311630419             | -1.36186074  | 2.471784185  |
| P    | -3.612358092            | 2.78043877   | -0.136807538 |
| N    | -5.451946485            | 0.406746569  | 0.077323519  |
| N    | 4.197382594             | -0.814123341 | 0.046747822  |
| P    | 2.723813658             | 0.534894237  | -2.327075892 |
| P    | -3.928119796            | -2.216701882 | 0.224555572  |
| N    | -1.153965395            | 0.145566495  | 0.013484433  |
| N    | 0.009428618             | 0.082603746  | 0.027925851  |
| N    | -3.045776238            | 0.525863975  | 3.189435782  |
| N    | -3.100344596            | 0.429279634  | 2.058535249  |
| N    | -3.190546227            | 0.098990088  | -1.99772073  |
| N    | -3.200870373            | 0.017018573  | -3.127967863 |
| N    | 1.808139055             | 2.664865739  | 1.017349076  |
| N    | 2.514668085             | 1.386793146  | 0.908119217  |
| H    | 2.01714333              | -0.051833393 | 6.122276933  |
| H    | -2.809158516            | 5.931228867  | 2.018473378  |
| H    | -4.200306364            | 4.860594401  | 2.185901503  |
| H    | 3.460419409             | -0.072030939 | 5.102916883  |
| C    | 2.502739687             | -0.576275763 | 5.285914941  |
| C    | -3.466027096            | 5.241656281  | 1.466509799  |
| H    | -2.616225703            | 2.982975211  | 2.763512584  |
| H    | 2.245203342             | 1.49699761   | 3.469950764  |
| H    | -3.998069906            | 5.83130473   | 0.715594808  |
| H    | 2.713356546             | -1.593756048 | 5.62014284   |
| H    | -1.267927549            | 4.103965028  | 2.564108042  |
| H    | 0.907863815             | 1.456678385  | 4.641538755  |
| C    | 1.321622474             | 0.973377945  | 3.744517684  |
| C    | -1.908121449            | 3.383030352  | 2.031523318  |
| H    | -0.28542612             | -0.538270047 | 5.163603383  |
| H    | -0.852927402            | 5.336727365  | 0.602606522  |

|   |              |              |              |
|---|--------------|--------------|--------------|
| C | 1.575533022  | -0.513488266 | 4.053142932  |
| C | -2.607632692 | 4.108144944  | 0.863712432  |
| H | -4.886151744 | 2.604383458  | 1.902242751  |
| H | 4.122967197  | 0.181964687  | 2.783567367  |
| H | 0.59064309   | 1.076699448  | 2.934126406  |
| H | -1.289395815 | 2.547911337  | 1.682467518  |
| H | 4.674133717  | -1.407334014 | 3.329039285  |
| H | -5.787554678 | 3.65473187   | 0.806883569  |
| C | 0.199402782  | -1.134041641 | 4.377027952  |
| C | -1.509102406 | 4.718186563  | -0.025909053 |
| H | 1.786189402  | -3.4375327   | 4.926039392  |
| H | -3.833916314 | 5.744475052  | -1.443928709 |
| H | -0.464722315 | -1.121128568 | 3.504182324  |
| H | -0.892700048 | 3.944436161  | -0.505036451 |
| C | 4.13007312   | -0.886402717 | 2.532048424  |
| C | -5.208780916 | 2.7245847    | 0.857783937  |
| H | 6.683467274  | -1.692455179 | 2.164434197  |
| H | -7.916126585 | 2.601074246  | 0.837769636  |
| H | 0.265421987  | -2.161910629 | 4.743524656  |
| H | -1.90598571  | 5.367352154  | -0.811732687 |
| H | 3.535012116  | -3.355256241 | 4.604188433  |
| H | -5.445565612 | 5.166933348  | -0.966650603 |
| H | -5.196704855 | -0.917887306 | 2.590156793  |
| H | 4.426514747  | 2.069551264  | -0.486601645 |
| C | 2.57319096   | -3.719716    | 4.220770838  |
| C | -4.637981139 | 5.047043219  | -1.7000351   |
| H | -3.644721833 | -3.32095087  | 3.879667517  |
| H | 3.369504039  | 4.323878789  | -2.334411453 |
| C | 6.189076826  | -1.485641269 | 1.218477159  |
| C | -7.466046327 | 1.666839884  | 0.510679794  |
| H | 2.626961094  | -4.818094719 | 4.223056316  |
| H | -5.039089643 | 5.364555111  | -2.673618565 |
| C | 4.855284252  | -1.074588716 | 1.214395787  |
| C | -6.074465139 | 1.555464285  | 0.469165432  |
| H | -5.769850044 | -2.273433423 | 3.570164897  |
| H | 5.283124623  | 3.242643756  | -1.523564573 |
| H | -2.830116937 | -2.007235534 | 3.018363065  |
| H | 2.263805895  | 3.331060194  | -1.364742327 |
| C | -5.552821856 | -1.949727427 | 2.541900392  |
| C | 4.815963052  | 2.246729578  | -1.49428853  |
| C | -3.300800466 | -2.986104358 | 2.88977748   |
| C | 2.769035578  | 3.401742981  | -2.332440757 |
| H | -9.343236636 | 0.655961537  | 0.146457877  |
| H | 7.904564299  | -1.969106458 | -0.003833559 |
| C | 2.310107782  | -3.265241705 | 2.770703567  |
| C | -4.160562511 | 3.584833799  | -1.816517988 |
| H | -6.500680183 | -1.963568812 | 1.9919915    |

|   |              |              |              |
|---|--------------|--------------|--------------|
| H | 5.608018356  | 1.515163859  | -1.688591833 |
| C | -8.257859855 | 0.586622945  | 0.127445512  |
| C | 6.868302165  | -1.637673987 | 0.010692     |
| H | -2.537447466 | -3.692275518 | 2.551372431  |
| H | 2.006274335  | 3.506241879  | -3.10723343  |
| H | 0.111683957  | -3.400896219 | 2.886306383  |
| H | -2.130043556 | 4.104007074  | -2.529070689 |
| H | 4.421446759  | -3.678351045 | 2.332916214  |
| H | -6.259893964 | 2.905624321  | -1.793477974 |
| C | -4.513247173 | -2.9188248   | 1.934754406  |
| C | 3.697936853  | 2.192571659  | -2.557970407 |
| C | 0.943578439  | -3.795616411 | 2.292844149  |
| C | -2.996544673 | 3.507176998  | -2.830265851 |
| C | 3.429241209  | -3.881050395 | 1.909597261  |
| C | -5.347441814 | 2.771196323  | -2.385082747 |
| H | 3.301257448  | -4.972677531 | 1.897222217  |
| H | -5.561760125 | 3.136683675  | -3.399709865 |
| H | -5.568043366 | -4.563307873 | 2.858094285  |
| H | 4.959387019  | 3.244473679  | -3.966598398 |
| C | 6.19605877   | -1.363875171 | -1.174213993 |
| C | -7.62388748  | -0.584052235 | -0.280610575 |
| H | 0.776355064  | -3.544144438 | 1.242476535  |
| H | -2.664584721 | 2.478690876  | -2.99658535  |
| C | 4.857969391  | -0.95508957  | -1.136338109 |
| C | -6.227844654 | -0.653994438 | -0.28872563  |
| C | -5.180244377 | -4.30733779  | 1.860985615  |
| C | 4.36287041   | 2.320186532  | -3.944726027 |
| H | -6.032770866 | -4.325926763 | 1.170487691  |
| H | 5.04959926   | 1.492455157  | -4.156922611 |
| H | 0.927282363  | -4.890722023 | 2.383892043  |
| H | -3.341274815 | 3.901937547  | -3.797212923 |
| H | -8.200506274 | -1.452625236 | -0.589071497 |
| H | 6.68994877   | -1.481498464 | -2.135182497 |
| H | 3.422044397  | -3.549049857 | 0.872169474  |
| H | -5.139930524 | 1.701045276  | -2.459964977 |
| H | -2.530780825 | -4.972847866 | 0.851262364  |
| H | 1.626529295  | 2.253288919  | -4.800668345 |
| C | -5.537348566 | -1.923759976 | -0.70568307  |
| C | 4.142860263  | -0.691516135 | -2.445697551 |
| H | -4.484800354 | -5.101374705 | 1.573095572  |
| H | 3.640919182  | 2.378685495  | -4.763788394 |
| H | -6.232757933 | -2.768742653 | -0.637907582 |
| H | 4.875991082  | -0.388866745 | -3.202832592 |
| H | -1.357805782 | -3.694612088 | 0.456162269  |
| H | 0.382564263  | 2.026201074  | -3.542773425 |
| C | -2.092343073 | -4.390381237 | 0.034569508  |
| C | 0.933715262  | 1.532700225  | -4.354078077 |

|   |              |              |              |
|---|--------------|--------------|--------------|
| H | -5.235169738 | -1.844983395 | -1.760246564 |
| H | 3.71091233   | -1.628289024 | -2.817506312 |
| C | -3.150730951 | -3.655229894 | -0.809164685 |
| C | 1.611460637  | 0.22709555   | -3.885684495 |
| H | -1.672002104 | -2.298094714 | -1.704435186 |
| H | -0.126623115 | -0.297505202 | -2.652772676 |
| H | -1.544238849 | -5.088519647 | -0.607759458 |
| H | 0.198224099  | 1.271764198  | -5.127656959 |
| C | -2.435039132 | -3.018370522 | -2.01676286  |
| C | 0.478305848  | -0.728515838 | -3.457402378 |
| H | -4.734987572 | -5.19068625  | -0.564778794 |
| H | 3.249410854  | 0.202163651  | -5.378684017 |
| H | -4.901254008 | -4.20736163  | -2.034112127 |
| H | 2.744514584  | -1.411970063 | -4.805561916 |
| C | -4.179984402 | -4.670659805 | -1.350089426 |
| C | 2.395670639  | -0.404848636 | -5.054779344 |
| H | -1.933802985 | -3.809276378 | -2.589448146 |
| H | -0.179638632 | -0.891969983 | -4.323576043 |
| H | -3.130336082 | -2.514700558 | -2.697026075 |
| H | 0.856636435  | -1.699115797 | -3.137046248 |
| H | -3.64003229  | -5.43406968  | -1.928701822 |
| H | 1.719118125  | -0.502655483 | -5.916492923 |
| S | 2.480999967  | -3.566284897 | -1.743578865 |
| O | 2.40934114   | -3.281786165 | -3.19539852  |
| O | 3.812182353  | -3.933320735 | -1.224038012 |
| O | 1.749702978  | -2.543315729 | -0.891640308 |
| C | 1.462774513  | -5.123701474 | -1.587310088 |
| F | 1.254841294  | -5.451387068 | -0.299429063 |
| F | 0.266822586  | -4.964556086 | -2.182807632 |
| F | 2.106589764  | -6.12903062  | -2.184414074 |
| C | 4.772297591  | 4.345899268  | 1.743679553  |
| N | 3.572094085  | 4.631556797  | 1.17893222   |
| C | 3.306227094  | 5.858613947  | 0.659973205  |
| C | 4.2888658    | 6.846979277  | 0.660820643  |
| C | 5.542331758  | 6.569277586  | 1.208079807  |
| C | 5.78146493   | 5.313789867  | 1.758681701  |
| H | 6.741830508  | 5.070742456  | 2.205457112  |
| H | 6.321280313  | 7.328908458  | 1.20996915   |
| H | 4.065646276  | 7.822111454  | 0.236704728  |
| C | 4.961808722  | 2.99785884   | 2.37615415   |
| H | 6.015852509  | 2.701083009  | 2.342048231  |
| H | 4.666898171  | 3.040180353  | 3.436016854  |
| H | 4.345255359  | 2.233792244  | 1.882758319  |
| C | 1.923571082  | 6.115681118  | 0.130492057  |
| H | 1.87351363   | 7.09203919   | -0.361070646 |
| H | 1.614637731  | 5.351626278  | -0.591357817 |
| H | 1.193719119  | 6.115211998  | 0.950831152  |

|   |             |             |             |
|---|-------------|-------------|-------------|
| H | 2.706974839 | 3.717296108 | 1.069586307 |
| H | 1.343291406 | 2.664520304 | 1.934727545 |
| H | 1.047215793 | 2.726141596 | 0.3255895   |

---

**Supplementary Table 42 | Cartesian coordinate of the product complex for protonation of V.  
Units are presented in Å.**

SCF energy (in toluene) = -5142.76598702 hartree

ZPE = 1.487369 hartree

-----

| Atom | Coordinates (Angstroms) |              |              |
|------|-------------------------|--------------|--------------|
|      | X                       | Y            | Z            |
| Mo   | -2.908412705            | -0.143291308 | -0.042507989 |
| Mo   | 2.216046337             | 0.675570716  | 0.412347894  |
| P    | 2.780739776             | -1.003377369 | 2.426723672  |
| P    | -3.937054422            | 2.190009014  | 0.222617886  |
| N    | -5.153961586            | -0.550947642 | -0.123596205 |
| N    | 4.472126682             | 0.703068712  | 0.423775733  |
| P    | 2.746264938             | 2.338589984  | -1.565966977 |
| P    | -3.027927046            | -2.709580196 | -0.397962372 |
| N    | -0.932776224            | 0.23076755   | 0.096261848  |
| N    | 0.203533584             | 0.454546107  | 0.235937121  |
| N    | -2.95237981             | -0.503168843 | 3.102145227  |
| N    | -2.946488716            | -0.383542728 | 1.972517393  |
| N    | -2.844150679            | 0.124272124  | -2.068045231 |
| N    | -2.814665301            | 0.285508149  | -3.18834917  |
| N    | 1.119590864             | 2.936761001  | 2.022242222  |
| N    | 2.270210838             | 2.031597472  | 1.675405569  |
| H    | 2.081812222             | -0.869985625 | 6.247756144  |
| H    | -3.888709878            | 4.977578967  | 2.947305085  |
| H    | -5.021514646            | 3.629478414  | 2.833162189  |
| H    | 3.466231228             | -0.183113177 | 5.391894367  |
| C    | 2.709341343             | -0.976594054 | 5.350545254  |
| C    | -4.365970392            | 4.280268537  | 2.24243597   |
| H    | -3.10965618             | 2.036727926  | 3.176691218  |
| H    | 1.859037597             | 1.349847804  | 4.103285993  |
| H    | -4.990315262            | 4.87253798   | 1.569696762  |
| H    | 3.220269567             | -1.938519602 | 5.424577586  |
| H    | -2.00981455             | 3.413610788  | 3.270344427  |
| H    | 0.594432944             | 0.618230302  | 5.116109514  |
| C    | 1.133701344             | 0.530836388  | 4.161992794  |
| C    | -2.475736526            | 2.696468939  | 2.57615319   |
| H    | 0.041339083             | -1.699208029 | 5.011238703  |
| H    | -1.770746173            | 5.038060254  | 1.575566456  |
| C    | 1.813548146             | -0.849776159 | 4.099423287  |
| C    | -3.269997807            | 3.476979398  | 1.510670746  |

-----

|   |              |              |              |
|---|--------------|--------------|--------------|
| H | -5.176808748 | 1.338261144  | 2.107400721  |
| H | 4.061840629  | 0.843496321  | 3.274112957  |
| H | 0.399320205  | 0.624899532  | 3.351916849  |
| H | -1.697641093 | 2.073371797  | 2.120097209  |
| H | 5.036671393  | -0.621194853 | 3.470931026  |
| H | -6.281031925 | 2.332730676  | 1.154790506  |
| C | 0.67704893   | -1.8937655   | 4.135776129  |
| C | -2.294256059 | 4.445041604  | 0.812870926  |
| H | 2.855703151  | -3.721446969 | 4.210515979  |
| H | -4.806191524 | 5.228945424  | -0.521123776 |
| H | 0.0393237    | -1.823940715 | 3.24581791   |
| H | -1.540624002 | 3.9102889    | 0.216523223  |
| C | 4.382737031  | -0.08092362  | 2.776112529  |
| C | -5.493967538 | 1.572303041  | 1.08062398   |
| H | 7.068322956  | -0.070560119 | 2.447126222  |
| H | -8.08592229  | 0.811717782  | 0.882321062  |
| H | 1.039299718  | -2.921401674 | 4.218285978  |
| H | -2.799375844 | 5.15405654   | 0.150223831  |
| H | 4.507708634  | -3.07560388  | 4.067336186  |
| H | -6.254786961 | 4.229393958  | -0.269149907 |
| H | -4.634075973 | -2.30750931  | 2.085065569  |
| H | 3.951816819  | 3.592367345  | 0.842421939  |
| C | 3.695927756  | -3.576666973 | 3.525136183  |
| C | -5.423074778 | 4.435249177  | -0.954777536 |
| H | -2.47676738  | -4.443788207 | 2.971699621  |
| H | 2.446325214  | 6.027873336  | -0.457361965 |
| C | 6.552130008  | 0.263290431  | 1.550550435  |
| C | -7.417718264 | 0.090564539  | 0.417944977  |
| H | 4.064783458  | -4.576395549 | 3.253563627  |
| H | -5.861379093 | 4.839861507  | -1.878587057 |
| C | 5.156888668  | 0.29680584   | 1.531388178  |
| C | -6.040776293 | 0.323678079  | 0.434911349  |
| H | -4.817689491 | -3.93695948  | 2.743725614  |
| H | 4.539718683  | 5.17133417   | 0.267698214  |
| H | -2.066882975 | -2.79874496  | 2.466068855  |
| H | 1.651078399  | 4.612141833  | 0.223585747  |
| C | -4.686574636 | -3.364758363 | 1.813924947  |
| C | 4.321430534  | 4.136230088  | -0.033524919 |
| C | -2.237689609 | -3.815113812 | 2.101193624  |
| C | 2.087360161  | 5.015897473  | -0.694787331 |
| H | -8.987748972 | -1.250175913 | -0.225972913 |
| H | 8.353969123  | 0.623525648  | 0.413461591  |
| C | 3.322745378  | -2.841712883 | 2.221148616  |
| C | -4.618390507 | 3.167513858  | -1.307084233 |
| H | -5.586921974 | -3.521986028 | 1.208978175  |
| H | 5.268810939  | 3.684849116  | -0.347366427 |
| C | -7.918086102 | -1.05486227  | -0.197214455 |



|   |              |              |              |
|---|--------------|--------------|--------------|
| C | 7.266383136  | 0.653892651  | 0.41937553   |
| H | -1.302241646 | -4.189055553 | 1.674037257  |
| H | 1.29480765   | 5.114154722  | -1.439738077 |
| H | 1.26056325   | -3.621508448 | 2.123214176  |
| H | -2.790440918 | 4.312234912  | -1.796817085 |
| H | 5.461536294  | -2.501552304 | 1.85797283   |
| H | -6.494169946 | 2.027795813  | -1.533531667 |
| C | -3.413338761 | -3.875766319 | 1.101852585  |
| C | 3.280819     | 4.164882861  | -1.174637509 |
| C | 2.169481448  | -3.580305075 | 1.512508765  |
| C | -3.447219829 | 3.556423653  | -2.238225518 |
| C | 4.576510835  | -2.871958858 | 1.325441614  |
| C | -5.570669367 | 2.231215196  | -2.087314458 |
| H | 4.781452577  | -3.916262866 | 1.049747368  |
| H | -5.85708202  | 2.729907996  | -3.024217298 |
| H | -3.990327258 | -5.89256871  | 1.618233008  |
| H | 4.291934221  | 5.850276514  | -2.077215275 |
| C | 6.564360496  | 1.085450765  | -0.699739627 |
| C | -7.014511217 | -1.943066842 | -0.774603066 |
| H | 1.929193666  | -3.104323414 | 0.558381499  |
| H | -2.836405788 | 2.694668197  | -2.519681506 |
| C | 5.165274714  | 1.104385507  | -0.677667298 |
| C | -5.643610629 | -1.676498642 | -0.719600776 |
| C | -3.673105636 | -5.346543677 | 0.717652821  |
| C | 3.928936102  | 4.860668607  | -2.391413726 |
| H | -4.476889975 | -5.451938823 | -0.021696492 |
| H | 4.796312495  | 4.311265278  | -2.775507751 |
| H | 2.475830482  | -4.615046083 | 1.303772666  |
| H | -3.857631921 | 3.986086511  | -3.163408158 |
| H | -7.360031783 | -2.848769835 | -1.266904773 |
| H | 7.087322511  | 1.397150387  | -1.600013505 |
| H | 4.473433313  | -2.311274226 | 0.396180809  |
| H | -5.109840801 | 1.276739061  | -2.351578646 |
| H | -0.925751095 | -5.058308513 | -0.266829165 |
| H | 1.310859759  | 4.45270173   | -3.494644873 |
| C | -4.661290026 | -2.642253775 | -1.328685669 |
| C | 4.424519279  | 1.569778559  | -1.913662785 |
| H | -2.781812163 | -5.851164618 | 0.332807211  |
| H | 3.232104258  | 5.017804773  | -3.220023689 |
| H | -5.127119224 | -3.628459956 | -1.442668238 |
| H | 5.068959714  | 2.247526743  | -2.485652174 |
| H | -0.162301235 | -3.453218855 | -0.345677023 |
| H | 0.134245978  | 3.555278559  | -2.49993547  |
| C | -0.675848262 | -4.224628526 | -0.931306141 |
| C | 0.810315985  | 3.488462661  | -3.362852966 |
| H | -4.394504139 | -2.298503029 | -2.338687945 |
| H | 4.238006156  | 0.714082467  | -2.573751734 |

|   |              |              |              |
|---|--------------|--------------|--------------|
| C | -1.908330668 | -3.656448138 | -1.660194619 |
| C | 1.779360781  | 2.293672373  | -3.245286193 |
| H | -0.83420766  | -1.82580781  | -2.254254512 |
| H | 0.190855843  | 1.036916925  | -2.403912582 |
| H | 0.040808347  | -4.597297134 | -1.672630926 |
| H | 0.18145732   | 3.328715575  | -4.249787121 |
| C | -1.417765257 | -2.635262188 | -2.70579687  |
| C | 0.907823798  | 1.019981642  | -3.231731702 |
| H | -3.023192205 | -5.576184624 | -1.77604076  |
| H | 3.401108882  | 3.112644175  | -4.511294052 |
| H | -3.462739088 | -4.404625398 | -3.034544901 |
| H | 3.3039485    | 1.330684369  | -4.49642754  |
| C | -2.635333    | -4.785819294 | -2.423339293 |
| C | 2.719261144  | 2.255621769  | -4.467804322 |
| H | -0.76923923  | -3.153225356 | -3.423309477 |
| H | 0.33755019   | 0.979780776  | -4.171567417 |
| H | -2.242330628 | -2.195235721 | -3.276174767 |
| H | 1.504773313  | 0.109792831  | -3.165743527 |
| H | -1.918464144 | -5.25201304  | -3.114579352 |
| H | 2.106991094  | 2.278097062  | -5.381051954 |
| S | 3.505845047  | -1.7025246   | -2.191003381 |
| O | 3.382143536  | -1.017096174 | -3.496511876 |
| O | 4.875878049  | -1.891205812 | -1.680362094 |
| O | 2.528259586  | -1.179069985 | -1.146784158 |
| C | 2.891064662  | -3.423507754 | -2.567208957 |
| F | 2.827926269  | -4.176231156 | -1.454573327 |
| F | 1.665542514  | -3.374346736 | -3.116816122 |
| F | 3.72676606   | -4.00408297  | -3.42989492  |
| C | 3.377190137  | 5.167925002  | 4.064066389  |
| N | 2.217697026  | 5.332213052  | 3.388955151  |
| C | 1.687845185  | 6.572003767  | 3.282662441  |
| C | 2.312460485  | 7.6935647    | 3.835512408  |
| C | 3.516956955  | 7.530987359  | 4.519598477  |
| C | 4.054463722  | 6.252741457  | 4.636917737  |
| H | 4.988339152  | 6.085034133  | 5.168034431  |
| H | 4.025991778  | 8.38851869   | 4.955149402  |
| H | 1.857996422  | 8.675297667  | 3.727659673  |
| C | 3.905877722  | 3.764698253  | 4.213312168  |
| H | 4.984807709  | 3.767198914  | 4.406985016  |
| H | 3.42132397   | 3.264890523  | 5.066324912  |
| H | 3.700844298  | 3.166890923  | 3.316736585  |
| C | 0.376599573  | 6.698526753  | 2.549973416  |
| H | 0.048382683  | 7.741908748  | 2.49567186   |
| H | 0.455639397  | 6.314426936  | 1.524439292  |
| H | -0.408072113 | 6.125291177  | 3.062774282  |
| H | 1.485512965  | 3.833154007  | 2.460277924  |
| H | 0.531771598  | 2.460674404  | 2.719096065  |

H 0.526437286 3.135915037 1.205880385

---

**Supplementary Table 43 | Cartesian coordinate of the reactant complex for protonation of IX.  
Units are presented in Å.**

SCF energy (in toluene) = -3106.71020800 hartree

ZPE = 0.837539 hartree

```

-----
Atom          Coordinates (Angstroms)
          X           Y           Z
-----
Mo          0.441189    0.058288165  -0.686129409
P          -0.670861103    2.341608145  -0.683735007
N           2.28185543    1.534548221  -0.200360327
P           2.549116342   -1.308007536  -1.041167246
N          -1.536374521   -2.178873005  -0.423003632
N          -0.806031229   -1.192990266  -1.119394879
H          -2.144801775    4.248179523  -3.730378306
H          -0.635593109    4.587837994  -2.881923712
C          -1.641301611    4.168315184  -2.755874355
H           0.184001014    2.172312589  -3.527690624
H          -2.188254721    4.801946112  -2.053816414
H          -1.348467256    2.086897493  -4.403860278
C          -0.871998904    1.886275488  -3.432571392
H          -3.528724187    2.180818408  -3.207946194
C          -1.606931025    2.685068639  -2.331687411
H           1.076415923    3.44498845   -1.948979063
H          -0.918991705    0.805038095  -3.253252285
H           0.660085728    4.45338353   -0.570962034
C          -3.044103768    2.13786502   -2.221412996
H          -3.167317058    4.335888594  -0.160193982
H          -3.046061638    1.091680587  -1.888058379
C           0.854065501    3.417486906  -0.872376685
H           2.811450803    4.818486474    0.412210999
H          -3.660507136    2.722034138  -1.529134119
H          -1.643326486    5.211533337    0.11592477
H           2.652807645    1.090007785  -2.831015332
C          -2.318748023    4.449169974    0.524278377
H           2.593903418   -1.154358163  -4.860758412
C           3.012876174    3.750419252    0.391236956
H          -2.717172914    4.846223893    1.469386443
C           2.07769936    2.879316889  -0.169297331
H           3.908799851    0.66633968   -4.008961293
H           1.279817756   -0.905865792  -3.694004045
C           3.55757331    0.489389327  -2.982353327

```

|   |              |              |              |
|---|--------------|--------------|--------------|
| C | 2.232378966  | -1.427482548 | -3.858838266 |
| H | 4.946985616  | 3.895955633  | 1.345078665  |
| C | -1.595951971 | 3.120979175  | 0.816030375  |
| H | 4.333019528  | 0.862146056  | -2.302888271 |
| C | 4.206215947  | 3.236594547  | 0.897804964  |
| H | 2.027237186  | -2.501976923 | -3.865743771 |
| H | -3.367470272 | 1.81977877   | 0.589341924  |
| H | 0.135984709  | 4.193224302  | 1.660607778  |
| C | 3.289481899  | -1.022320854 | -2.807725585 |
| C | -2.607161482 | 2.077278275  | 1.338526622  |
| C | -0.546797312 | 3.374758493  | 1.919982969  |
| H | -1.0719949   | 3.676111186  | 2.837609257  |
| H | 4.997581749  | -1.454867478 | -4.066001391 |
| C | 4.443846815  | 1.869058763  | 0.796914567  |
| H | -2.086743688 | 1.165619597  | 1.652427144  |
| C | 3.466974696  | 1.037578368  | 0.238347488  |
| C | 4.614315101  | -1.761547687 | -3.081792482 |
| H | 5.38848984   | -1.514429156 | -2.343905508 |
| H | -3.130335034 | 2.490260764  | 2.213151607  |
| H | 5.374301449  | 1.435126417  | 1.154431842  |
| H | 0.037904928  | 2.485624813  | 2.170479833  |
| H | 2.853297636  | -4.065482107 | -2.598088398 |
| C | 3.7332333    | -0.446340303 | 0.115711723  |
| H | 4.4993859    | -2.849573601 | -3.107174146 |
| H | 4.785496718  | -0.611951467 | -0.151995196 |
| H | 1.194498794  | -3.774978772 | -2.032677057 |
| C | 2.205053316  | -4.066786265 | -1.716314493 |
| H | 3.567757331  | -0.901595786 | 1.101958284  |
| C | 2.730691796  | -3.172369066 | -0.574700484 |
| H | 0.793515214  | -3.237961532 | 0.444280165  |
| H | 2.153541984  | -5.103561987 | -1.354412747 |
| C | 1.849338284  | -3.428230089 | 0.662960152  |
| H | 4.884933502  | -3.407031283 | -1.040885774 |
| H | 4.545964384  | -3.023054214 | 0.659358725  |
| C | 4.180281598  | -3.565673923 | -0.220248609 |
| H | 1.949207171  | -4.484525601 | 0.953978392  |
| H | 2.129438787  | -2.809887577 | 1.519088145  |
| H | 4.203231539  | -4.636083737 | 0.030857615  |
| H | -1.395781979 | -3.089146969 | -0.874929185 |
| S | 0.750285544  | -0.337556486 | 2.845008783  |
| O | 2.063500185  | -1.00306126  | 2.758026235  |
| O | 0.635920419  | 0.834611018  | 3.720360378  |
| O | 0.048178772  | -0.146031339 | 1.499250939  |
| C | -0.404607965 | -1.603881323 | 3.591911934  |
| F | -1.60804616  | -1.050864275 | 3.835949995  |
| F | -0.603900685 | -2.639588318 | 2.732475435  |
| F | 0.089775038  | -2.09078707  | 4.725526236  |

|   |              |              |              |
|---|--------------|--------------|--------------|
| H | -1.182031781 | -2.247594072 | 0.540750236  |
| C | -4.917888017 | -1.493342218 | 0.713899619  |
| N | -4.245035033 | -1.6302212   | -0.458835757 |
| C | -4.821487924 | -1.555182449 | -1.685162888 |
| C | -6.191394915 | -1.30759556  | -1.756914485 |
| C | -6.925615043 | -1.159783707 | -0.579188218 |
| C | -6.289372419 | -1.254688189 | 0.660682674  |
| H | -6.845462796 | -1.143177199 | 1.586960703  |
| H | -7.995967871 | -0.970738529 | -0.626533676 |
| H | -6.669858736 | -1.237797103 | -2.729725593 |
| C | -3.943158959 | -1.77406094  | -2.884069533 |
| H | -4.367915739 | -1.280689034 | -3.764053326 |
| H | -2.92577369  | -1.397958666 | -2.716399699 |
| H | -3.872491589 | -2.848141204 | -3.110791445 |
| C | -4.130229597 | -1.593385298 | 1.986692608  |
| H | -4.796765607 | -1.558323698 | 2.853222079  |
| H | -3.554400455 | -2.526269784 | 2.033915023  |
| H | -3.41388032  | -0.767167819 | 2.072841808  |
| H | -3.178528865 | -1.8318016   | -0.419023097 |

---

**Supplementary Table 44 | Cartesian coordinate of the transition state for protonation of IX.**  
**Units are presented in Å.**

SCF energy (in toluene) = -3106.70281635 hartree

ZPE = 0.833893 hartree

imaginary frequency: 967i

---

| Atom | Coordinates (Angstroms) |              |              |
|------|-------------------------|--------------|--------------|
|      | X                       | Y            | Z            |
| Mo   | 0.417341928             | 0.03430861   | -0.671770101 |
| P    | -0.650227024            | 2.333915248  | -0.648112727 |
| N    | 2.2802417               | 1.476518709  | -0.137754061 |
| P    | 2.517312022             | -1.34674811  | -1.047040955 |
| N    | -1.629562098            | -2.044454827 | -0.18687632  |
| N    | -0.907014647            | -1.166138092 | -1.062173401 |
| H    | -2.028743645            | 4.226656119  | -3.741486408 |
| H    | -0.552401129            | 4.57472311   | -2.839592147 |
| C    | -1.559696628            | 4.149251059  | -2.749941139 |
| H    | 0.305083308             | 2.147723452  | -3.444505968 |
| H    | -2.13540778             | 4.778972913  | -2.067491451 |
| H    | -1.189343698            | 2.063537274  | -4.382775947 |
| C    | -0.755109585            | 1.86543679   | -3.391666337 |
| H    | -3.424593792            | 2.162877002  | -3.263232417 |
| C    | -1.534967344            | 2.666875923  | -2.323643467 |
| H    | 1.133713288             | 3.450575914  | -1.85283438  |
| H    | -0.820368361            | 0.783143192  | -3.217301664 |
| H    | 0.700083389             | 4.425085881  | -0.456629015 |
| C    | -2.972031673            | 2.111242794  | -2.262279156 |
| H    | -3.178954562            | 4.283943063  | -0.197893399 |
| H    | -2.982540187            | 1.061307824  | -1.942400996 |
| C    | 0.889374862             | 3.395961502  | -0.782167677 |
| H    | 2.834366523             | 4.731517639  | 0.594093312  |
| H    | -3.613079485            | 2.686451489  | -1.58517603  |
| H    | -1.679432509            | 5.182217627  | 0.137985501  |
| H    | 2.702902664             | 1.105303021  | -2.757527022 |
| C    | -2.357425873            | 4.406665354  | 0.516658292  |
| H    | 2.604984602             | -1.08402812  | -4.858829515 |
| C    | 3.02329183              | 3.662346791  | 0.541299695  |
| H    | -2.79511759             | 4.790658544  | 1.44949552   |
| C    | 2.091034968             | 2.822234587  | -0.068204728 |
| H    | 3.952817314             | 0.680272183  | -3.940259571 |

|   |              |              |              |
|---|--------------|--------------|--------------|
| H | 1.28356651   | -0.833200861 | -3.703479118 |
| C | 3.589745149  | 0.482096304  | -2.921881906 |
| C | 2.224667309  | -1.375296204 | -3.869236689 |
| H | 4.936374661  | 3.751233933  | 1.542984051  |
| C | -1.623118331 | 3.089374814  | 0.828568464  |
| H | 4.370948496  | 0.811907221  | -2.227034013 |
| C | 4.198637023  | 3.116458756  | 1.056897521  |
| H | 1.990623526  | -2.44304348  | -3.908920528 |
| H | -3.34752939  | 1.73597188   | 0.538162895  |
| H | 0.056979943  | 4.19627526   | 1.729493467  |
| C | 3.279876826  | -1.026755376 | -2.796020674 |
| C | -2.628989222 | 2.023927639  | 1.316013005  |
| C | -0.609951609 | 3.356710937  | 1.96132703   |
| H | -1.167151819 | 3.634220069  | 2.867598539  |
| H | 4.989836876  | -1.466410485 | -4.048098281 |
| C | 4.423297757  | 1.750498089  | 0.915749803  |
| H | -2.099671893 | 1.129148066  | 1.662438284  |
| C | 3.449214661  | 0.949835053  | 0.309113477  |
| C | 4.589000964  | -1.791231484 | -3.076955503 |
| H | 5.360755698  | -1.583851634 | -2.324534788 |
| H | -3.200669422 | 2.430984965  | 2.162482699  |
| H | 5.34047249   | 1.293973292  | 1.279344125  |
| H | -0.006952551 | 2.48086573   | 2.216996929  |
| H | 2.772567671  | -4.061536482 | -2.677245143 |
| C | 3.701827226  | -0.53359855  | 0.143990407  |
| H | 4.447369612  | -2.87477469  | -3.134154849 |
| H | 4.753780833  | -0.70135968  | -0.12384341  |
| H | 1.111467086  | -3.752536803 | -2.125606421 |
| C | 2.111586761  | -4.074195254 | -1.805142085 |
| H | 3.529251753  | -1.017409707 | 1.115282045  |
| C | 2.639425437  | -3.226644703 | -0.629036501 |
| H | 0.681680898  | -3.309640139 | 0.352828826  |
| H | 2.033761826  | -5.119735873 | -1.47491688  |
| C | 1.734126206  | -3.504419676 | 0.587606806  |
| H | 4.796140702  | -3.486681289 | -1.069599835 |
| H | 4.43727866   | -3.153253194 | 0.637521631  |
| C | 4.075901739  | -3.659208424 | -0.265410149 |
| H | 1.825614614  | -4.567371806 | 0.855278103  |
| H | 1.998220854  | -2.90691239  | 1.463370792  |
| H | 4.074566087  | -4.737612291 | -0.051102347 |
| H | -1.441237151 | -3.016638449 | -0.461394504 |
| S | 0.769907524  | -0.38984772  | 2.827399015  |
| O | 2.019690274  | -1.168232865 | 2.755333935  |
| O | 0.798871986  | 0.87380118   | 3.57205102   |
| O | 0.015620394  | -0.286999271 | 1.493045218  |
| C | -0.449161436 | -1.478589735 | 3.732431895  |
| F | -1.594649327 | -0.812100052 | 3.953901017  |



|   |              |              |              |
|---|--------------|--------------|--------------|
| F | -0.748725677 | -2.569419344 | 2.979214454  |
| F | 0.055151619  | -1.888089991 | 4.890764946  |
| H | -1.281078983 | -1.916178187 | 0.777792922  |
| C | -4.931701546 | -1.612332985 | 0.817549804  |
| N | -4.212792795 | -1.736822331 | -0.325219153 |
| C | -4.798204472 | -1.753610481 | -1.545525231 |
| C | -6.184876317 | -1.61774181  | -1.651723867 |
| C | -6.949170358 | -1.484256591 | -0.493781642 |
| C | -6.319547949 | -1.485121835 | 0.752041929  |
| H | -6.89290647  | -1.387165723 | 1.669860246  |
| H | -8.030454413 | -1.382400698 | -0.55988765  |
| H | -6.650593335 | -1.624508166 | -2.633743084 |
| C | -3.912591503 | -1.957785503 | -2.746540079 |
| H | -4.362990097 | -1.511701044 | -3.639700773 |
| H | -2.914624537 | -1.527061557 | -2.596244593 |
| H | -3.787367704 | -3.032229779 | -2.948267827 |
| C | -4.177752717 | -1.605126739 | 2.120138407  |
| H | -4.870319901 | -1.608199087 | 2.967365582  |
| H | -3.523174465 | -2.480795167 | 2.217539441  |
| H | -3.544537824 | -0.713293936 | 2.206801283  |
| H | -2.919732451 | -1.867493875 | -0.24879658  |

---

**Supplementary Table 45 | Cartesian coordinate of the product complex for protonation of IX.**  
**Units are presented in Å.**

SCF energy (in toluene) = -3106.70689941 hartree

ZPE = 0.837796 hartree

-----

| Atom | Coordinates (Angstroms) |              |              |
|------|-------------------------|--------------|--------------|
|      | X                       | Y            | Z            |
| Mo   | 0.464455677             | 0.043523483  | -0.797841915 |
| P    | -0.608292433            | 2.330498394  | -0.749918236 |
| N    | 2.2929667               | 1.486654742  | -0.157234007 |
| P    | 2.604846735             | -1.291491334 | -1.170116891 |
| N    | -1.615530555            | -1.923081533 | -0.153415157 |
| N    | -0.927947667            | -1.10948394  | -1.145365567 |
| H    | -1.861347726            | 4.20216564   | -3.906046314 |
| H    | -0.436147289            | 4.5731272    | -2.933750199 |
| C    | -1.439280761            | 4.130496046  | -2.893305481 |
| H    | 0.496998317             | 2.160237055  | -3.479915468 |
| H    | -2.05822207             | 4.749007188  | -2.238261876 |
| H    | -0.940946486            | 2.031009496  | -4.497668727 |
| C    | -0.558336699            | 1.8555603    | -3.481440823 |
| H    | -3.23419376             | 2.10957707   | -3.511401104 |
| C    | -1.41398172             | 2.649047744  | -2.465882035 |
| H    | 1.199982948             | 3.520937851  | -1.8438969   |
| H    | -0.614392596            | 0.771158859  | -3.304108815 |
| H    | 0.699409294             | 4.430645646  | -0.426003799 |
| C    | -2.842816517            | 2.070378224  | -2.484674038 |
| H    | -3.188208946            | 4.210868121  | -0.408196361 |
| H    | -2.859574185            | 1.022457024  | -2.160651622 |
| C    | 0.916388403             | 3.418831122  | -0.786578224 |
| H    | 2.798917406             | 4.715059977  | 0.710268681  |
| H    | -3.531461106            | 2.641255869  | -1.85235848  |
| H    | -1.728710024            | 5.125889577  | 0.038925194  |
| H    | 2.87870641              | 1.240091     | -2.746244297 |
| C    | -2.415378265            | 4.33138546   | 0.358457521  |
| H    | 2.950565723             | -0.870324688 | -4.952862459 |
| C    | 2.995136269             | 3.649057637  | 0.628878835  |
| H    | -2.915943469            | 4.68689824   | 1.270549395  |
| C    | 2.094124002             | 2.82745882   | -0.048047299 |
| H    | 4.198484365             | 0.877139689  | -3.872366735 |
| H    | 1.552939377             | -0.631205184 | -3.890887503 |
| C    | 3.779368773             | 0.631280878  | -2.886494616 |

-----

|   |              |              |              |
|---|--------------|--------------|--------------|
| C | 2.494706242  | -1.185711736 | -4.003617936 |
| H | 4.862314531  | 3.709701052  | 1.715234355  |
| C | -1.677752601 | 3.019671631  | 0.685949132  |
| H | 4.517251443  | 0.933967767  | -2.134477971 |
| C | 4.149146079  | 3.089469223  | 1.176640102  |
| H | 2.249003785  | -2.24720901  | -4.094642164 |
| H | -3.345468845 | 1.631180738  | 0.253256804  |
| H | -0.085210261 | 4.142727107  | 1.713622739  |
| C | 3.474010596  | -0.882796659 | -2.847802559 |
| C | -2.687310709 | 1.921257779  | 1.080403926  |
| C | -0.735452829 | 3.27508745   | 1.881047394  |
| H | -1.348189974 | 3.501514883  | 2.765338461  |
| H | 5.26478881   | -1.269677257 | -3.998597791 |
| C | 4.383990459  | 1.729310692  | 1.003370079  |
| H | -2.162936539 | 1.030229473  | 1.442194618  |
| C | 3.439807223  | 0.94735899   | 0.329881793  |
| C | 4.803994799  | -1.630033076 | -3.06766541  |
| H | 5.522225598  | -1.443505976 | -2.25911761  |
| H | -3.322917701 | 2.293987551  | 1.896533868  |
| H | 5.283926103  | 1.262573178  | 1.395762108  |
| H | -0.108107444 | 2.41386547   | 2.129506843  |
| H | 3.019907291  | -3.916473424 | -2.90886025  |
| C | 3.69474905   | -0.533497013 | 0.141698668  |
| H | 4.67483392   | -2.711494472 | -3.169180316 |
| H | 4.764304611  | -0.705343414 | -0.038606817 |
| H | 1.311950481  | -3.661099116 | -2.482329395 |
| C | 2.288787937  | -3.982366195 | -2.097442267 |
| H | 3.437673939  | -1.052075523 | 1.077199415  |
| C | 2.699960043  | -3.190753591 | -0.838646053 |
| H | 0.663142287  | -3.342361268 | -0.067506832 |
| H | 2.20336402   | -5.044312697 | -1.827177462 |
| C | 1.687553156  | -3.537131694 | 0.271527877  |
| H | 4.891260493  | -3.400376757 | -1.092591132 |
| H | 4.372313591  | -3.173915026 | 0.592045078  |
| C | 4.103740219  | -3.628544353 | -0.368576118 |
| H | 1.765893909  | -4.611636479 | 0.492117428  |
| H | 1.854784485  | -2.98710808  | 1.201511292  |
| H | 4.100132602  | -4.717662562 | -0.219419084 |
| H | -1.442222114 | -2.917186969 | -0.350955373 |
| S | 0.895628223  | -0.392952064 | 2.673845793  |
| O | 1.9166446    | -1.454219199 | 2.738347349  |
| O | 1.280197776  | 0.950363022  | 3.123130651  |
| O | 0.098143694  | -0.378006761 | 1.35447176   |
| C | -0.494371794 | -0.964154257 | 3.782659173  |
| F | -1.465748867 | -0.038201744 | 3.824206721  |
| F | -1.025961664 | -2.105453331 | 3.285818557  |
| F | -0.046467464 | -1.19355589  | 5.011195831  |

|   |              |              |              |
|---|--------------|--------------|--------------|
| H | -1.234403658 | -1.702278421 | 0.788957507  |
| C | -5.087172974 | -1.571516329 | 0.991114597  |
| N | -4.403556904 | -1.678529369 | -0.171305276 |
| C | -5.061820069 | -1.659606358 | -1.350346065 |
| C | -6.452479956 | -1.505378408 | -1.401241306 |
| C | -7.166233187 | -1.386384246 | -0.210990125 |
| C | -6.477252581 | -1.424630886 | 1.001441335  |
| H | -7.005410432 | -1.34182971  | 1.94801552   |
| H | -8.248014864 | -1.268564029 | -0.226002243 |
| H | -6.95974913  | -1.487265266 | -2.362885236 |
| C | -4.24776529  | -1.855340404 | -2.60574639  |
| H | -4.742175849 | -1.403837765 | -3.473176664 |
| H | -3.242869746 | -1.42634362  | -2.50931001  |
| H | -4.130591004 | -2.927986229 | -2.821932061 |
| C | -4.289581091 | -1.61819945  | 2.270598596  |
| H | -4.949088119 | -1.631927235 | 3.144601349  |
| H | -3.658300015 | -2.515626145 | 2.314183004  |
| H | -3.628476164 | -0.746877039 | 2.366692406  |
| H | -2.692126078 | -1.777629651 | -0.17304515  |

---

**Supplementary Table 46 | Cartesian coordinate of the reactant complex for protonation of XI.  
Units are presented in Å.**

SCF energy (in toluene) = -3050.84437788 hartree

ZPE = 0.810189 hartree

---

| Atom | Coordinates (Angstroms) |              |              |
|------|-------------------------|--------------|--------------|
|      | X                       | Y            | Z            |
| Mo   | 0.445715914             | 0.162627326  | -0.0993269   |
| P    | 0.27710922              | 2.54576064   | 0.871507359  |
| N    | 1.919020395             | 1.278522297  | -1.421247794 |
| P    | 1.766347114             | -1.726317333 | -1.086496071 |
| N    | -0.918204086            | 0.001174918  | -1.066088275 |
| H    | -1.994867291            | 5.560177769  | 0.035464751  |
| H    | -0.260478216            | 5.56453439   | 0.372390039  |
| C    | -1.198844574            | 5.036278051  | 0.584363547  |
| H    | -0.136629594            | 4.091636985  | -1.751497272 |
| H    | -1.42128268             | 5.137471002  | 1.651224831  |
| H    | -1.89811631             | 4.031735428  | -1.855797702 |
| C    | -1.02109183             | 3.53936047   | -1.409378171 |
| H    | -3.332850677            | 3.43024549   | 0.050296786  |
| C    | -1.171003117            | 3.565211178  | 0.126950322  |
| H    | 1.724973518             | 4.35091378   | -0.109812048 |
| H    | -0.962487666            | 2.515266533  | -1.793252977 |
| H    | 2.616328142             | 3.135438729  | 0.78202672   |
| C    | -2.499608969            | 2.882023432  | 0.514974166  |
| H    | 0.512667638             | 5.237041239  | 2.583368809  |
| H    | -2.529102171            | 1.842269782  | 0.172286594  |
| C    | 1.807239472             | 3.268779425  | 0.049418763  |
| H    | 3.276887192             | 4.335595599  | -1.933063156 |
| H    | -2.666356929            | 2.878882859  | 1.59690088   |
| H    | 2.155219713             | 4.594834172  | 2.380191236  |
| H    | -0.796824063            | -2.235072583 | -2.354372779 |
| C    | 1.19925101              | 4.446600133  | 2.897511469  |
| H    | -0.256923958            | -4.928290032 | -0.791217428 |
| C    | 3.055526691             | 3.287934898  | -2.120046443 |
| H    | 1.394295783             | 4.593163883  | 3.969355245  |
| C    | 2.245951854             | 2.58844365   | -1.219887036 |
| H    | -0.73851301             | -3.932050025 | -2.880815277 |
| H    | -0.451477014            | -3.350169897 | 0.005571262  |
| C    | -0.131989707            | -3.031821549 | -2.709045761 |
| C    | 0.274654514             | -4.025717255 | -0.456618198 |

---

|   |              |              |              |
|---|--------------|--------------|--------------|
| H | 4.228527647  | 3.159455843  | -3.929577159 |
| C | 0.626892132  | 3.025128317  | 2.704734576  |
| H | 0.285371025  | -2.739681299 | -3.680740166 |
| C | 3.589605957  | 2.63134953   | -3.224905032 |
| H | 0.980180596  | -4.332133257 | 0.320405532  |
| H | -1.383741998 | 3.670685425  | 3.32170705   |
| H | 2.622489978  | 2.068806291  | 2.63829437   |
| C | 0.96288177   | -3.371265682 | -1.673073789 |
| C | -0.660700864 | 2.875725581  | 3.541437553  |
| C | 1.682137142  | 2.011948389  | 3.206006764  |
| H | 1.929075056  | 2.246543997  | 4.250853743  |
| H | 1.408912367  | -5.22354601  | -2.700010819 |
| C | 3.308242478  | 1.278721631  | -3.396361791 |
| H | -1.151030593 | 1.90786349   | 3.399279511  |
| C | 2.472775692  | 0.621803911  | -2.489029169 |
| C | 1.960033995  | -4.350765194 | -2.321078516 |
| H | 2.4876823    | -3.904900127 | -3.174398434 |
| H | -0.402593053 | 2.955544038  | 4.606401978  |
| H | 3.726515771  | 0.725050115  | -4.232961886 |
| H | 1.31231315   | 0.984059927  | 3.187102112  |
| H | 3.169792686  | -4.124167722 | 0.411826135  |
| C | 2.158137908  | -0.83754271  | -2.697090754 |
| H | 2.704848967  | -4.723648859 | -1.610694559 |
| H | 1.223585039  | -0.9089734   | -3.268283626 |
| H | 2.458214035  | -2.931605349 | 1.527975518  |
| C | 3.29894771   | -3.129663179 | 0.851604475  |
| H | 2.941585492  | -1.309352183 | -3.303226453 |
| C | 3.453444666  | -2.023577666 | -0.21509947  |
| H | 3.068193978  | -0.457144134 | 1.288508183  |
| H | 4.214257723  | -3.161731235 | 1.459540908  |
| C | 3.819647066  | -0.717815285 | 0.530019059  |
| H | 4.393698472  | -3.271551472 | -1.777810832 |
| H | 4.798950673  | -1.545355417 | -1.888260559 |
| C | 4.593056992  | -2.368630685 | -1.192180907 |
| H | 4.770196397  | -0.868630885 | 1.06132638   |
| H | 3.957040749  | 0.132192223  | -0.147836423 |
| H | 5.515032097  | -2.544338982 | -0.619695931 |
| S | -0.816564167 | -0.961908867 | 2.867696662  |
| O | -0.210424595 | -0.564461812 | 4.143750283  |
| O | -2.090144747 | -0.327907372 | 2.470174394  |
| O | 0.197832978  | -1.030235567 | 1.711602926  |
| C | -1.192602951 | -2.780881252 | 3.058288959  |
| F | -1.885001585 | -3.231492734 | 1.987672163  |
| F | -0.058406342 | -3.486029316 | 3.152698292  |
| F | -1.929525742 | -2.976144244 | 4.151297191  |
| C | -3.931394463 | 0.19703417   | -3.081604478 |
| N | -3.569179563 | -0.398430242 | -1.914690534 |

|   |              |              |              |
|---|--------------|--------------|--------------|
| C | -4.408741031 | -1.128772268 | -1.132372825 |
| C | -5.734563375 | -1.261468017 | -1.546444063 |
| C | -6.154027294 | -0.664231072 | -2.734575046 |
| C | -5.2483879   | 0.063234444  | -3.510497831 |
| H | -5.553789043 | 0.528041475  | -4.443477529 |
| H | -7.186311776 | -0.770127745 | -3.061490074 |
| H | -6.421826834 | -1.838148131 | -0.934559048 |
| C | -2.887678326 | 0.978518524  | -3.824661441 |
| H | -3.19855527  | 1.139721771  | -4.861327447 |
| H | -2.737341172 | 1.960427835  | -3.355920907 |
| H | -1.920576036 | 0.463507328  | -3.813857881 |
| C | -3.8494525   | -1.755580275 | 0.103792165  |
| H | -3.043449737 | -2.454985026 | -0.150714746 |
| H | -3.413174818 | -1.015230488 | 0.788513191  |
| H | -4.629122761 | -2.30810875  | 0.636055702  |
| H | -2.56272041  | -0.275656922 | -1.589097802 |

---

**Supplementary Table 47 | Cartesian coordinate of the transition state for protonation of XI.  
Units are presented in Å.**

SCF energy (in toluene) = -3050.83593497 hartree

ZPE = 0.805643 hartree

imaginary frequency: 117i

---

| Atom | Coordinates (Angstroms) |              |              |
|------|-------------------------|--------------|--------------|
|      | X                       | Y            | Z            |
| Mo   | -0.43292601             | 0.172783684  | -0.166609727 |
| P    | -2.163636581            | -1.610250788 | 0.553805765  |
| N    | -1.964768605            | 0.380300523  | -1.812692517 |
| P    | 0.183469921             | 2.408980752  | -1.124911682 |
| N    | 0.815608805             | -0.727130542 | -0.883942499 |
| H    | -2.429579563            | -5.383104323 | -0.218375699 |
| H    | -3.72697618             | -4.184658909 | -0.161947474 |
| C    | -2.741540606            | -4.438331714 | 0.249026948  |
| H    | -2.425515238            | -3.118570608 | -2.116586097 |
| H    | -2.848801443            | -4.628315363 | 1.321178928  |
| H    | -1.109459768            | -4.282023567 | -1.9301323   |
| C    | -1.48310014             | -3.306880482 | -1.586378673 |
| H    | -0.049997619            | -4.763693527 | 0.257560166  |
| C    | -1.675507713            | -3.367901779 | -0.055402478 |
| H    | -4.187793512            | -1.941296426 | -0.885999078 |
| H    | -0.757167909            | -2.541829505 | -1.881844039 |
| H    | -4.190593889            | -0.423507526 | -0.012343022 |
| C    | -0.342222955            | -3.764609274 | 0.611856392  |
| H    | -4.48595471             | -3.362346727 | 1.874360381  |
| H    | 0.458855334             | -3.063036418 | 0.358353111  |
| C    | -3.551131669            | -1.094367866 | -0.603961358 |
| H    | -4.900468676            | -0.891447991 | -2.9150707   |
| H    | -0.415679366            | -3.806372694 | 1.703502997  |
| H    | -5.183885137            | -1.790563929 | 1.431984006  |
| H    | 2.551405888             | 0.888140897  | -1.940292453 |
| C    | -4.517422882            | -2.302230555 | 2.137527999  |
| H    | 3.762837278             | 3.169305825  | -0.115173964 |
| C    | -3.991232984            | -0.296229852 | -2.931891169 |
| H    | -4.989415183            | -2.227818424 | 3.127348269  |
| C    | -3.130169942            | -0.332099454 | -1.831080674 |
| H    | 3.788886944             | 2.115442186  | -2.2573098   |
| H    | 2.655203175             | 1.904463894  | 0.456732939  |

---



|   |              |              |              |
|---|--------------|--------------|--------------|
| C | 2.70816529   | 1.919097468  | -2.279191117 |
| C | 2.704027544  | 2.903856922  | 0.014713108  |
| H | -4.356032591 | 0.561623292  | -4.880011591 |
| C | -3.119166784 | -1.649668036 | 2.22683422   |
| H | 2.391798651  | 2.003214852  | -3.326408141 |
| C | -3.69152842  | 0.517328499  | -4.019744199 |
| H | 2.275641907  | 3.605721751  | 0.735188155  |
| H | -2.251456172 | -3.463000915 | 3.118866203  |
| H | -3.878698867 | 0.407773451  | 1.906786693  |
| C | 2.009897749  | 2.948096346  | -1.362952873 |
| C | -2.280255869 | -2.381127707 | 3.294857504  |
| C | -3.309934527 | -0.173435518 | 2.647442029  |
| H | -3.891782541 | -0.148514699 | 3.579367815  |
| H | 3.222142156  | 4.543110298  | -2.17330546  |
| C | -2.534285716 | 1.289896318  | -3.975825413 |
| H | -1.252999651 | -2.009865067 | 3.357893278  |
| C | -1.684170592 | 1.206480812  | -2.870612709 |
| C | 2.155218139  | 4.345735786  | -1.997241124 |
| H | 1.646855775  | 4.42079686   | -2.967155953 |
| H | -2.745943384 | -2.223946094 | 4.277406351  |
| H | -2.276325948 | 1.953481495  | -4.796930638 |
| H | -2.3620693   | 0.330003779  | 2.853646888  |
| H | 0.635841759  | 5.0745809    | 0.489183611  |
| C | -0.417354445 | 2.026641123  | -2.858618997 |
| H | 1.783193393  | 5.144472974  | -1.347644663 |
| H | 0.386987651  | 1.419211478  | -3.29375939  |
| H | 0.045745556  | 3.742425328  | 1.513877134  |
| C | -0.245426306 | 4.484788806  | 0.761038307  |
| H | -0.533907691 | 2.907115054  | -3.502100814 |
| C | -0.921174728 | 3.830606088  | -0.463728715 |
| H | -2.072155307 | 2.471296304  | 0.83817459   |
| H | -0.963014547 | 5.172345443  | 1.230048041  |
| C | -2.243359306 | 3.19100918   | 0.024814873  |
| H | -0.363781609 | 5.379462991  | -1.939542481 |
| H | -1.830757287 | 4.470030803  | -2.36466371  |
| C | -1.253621527 | 4.890676123  | -1.531053527 |
| H | -2.887689837 | 3.981694831  | 0.434755261  |
| H | -2.801766662 | 2.702694338  | -0.782024384 |
| H | -1.875615254 | 5.672823095  | -1.072934426 |
| S | 0.560910643  | 0.263348439  | 3.087109605  |
| O | -0.435729719 | 0.55147207   | 4.124447147  |
| O | 1.045930351  | -1.11715813  | 2.922336086  |
| O | 0.209087144  | 0.929032611  | 1.727926047  |
| C | 2.053724433  | 1.291423026  | 3.538450324  |
| F | 3.076767008  | 1.018895134  | 2.70661543   |
| F | 1.761575784  | 2.596515906  | 3.443660494  |
| F | 2.423992179  | 1.009301415  | 4.785673721  |

|   |             |              |              |
|---|-------------|--------------|--------------|
| C | 3.110127496 | -2.711236714 | -2.640474017 |
| N | 2.978440007 | -2.131082245 | -1.425608131 |
| C | 3.901877422 | -2.323327855 | -0.454926314 |
| C | 5.011186625 | -3.14352492  | -0.690639454 |
| C | 5.161850116 | -3.752958005 | -1.934095858 |
| C | 4.203788427 | -3.531716818 | -2.923968351 |
| H | 4.296186071 | -3.988071819 | -3.906176099 |
| H | 6.01943071  | -4.39275194  | -2.132743063 |
| H | 5.742950821 | -3.293031158 | 0.098935938  |
| C | 2.034403495 | -2.43864644  | -3.660599533 |
| H | 2.299865549 | -2.867141771 | -4.632349638 |
| H | 1.075810955 | -2.873073511 | -3.347101273 |
| H | 1.878120406 | -1.359892855 | -3.78937099  |
| C | 3.701973282 | -1.611388944 | 0.854020603  |
| H | 3.810903118 | -0.52667406  | 0.723495983  |
| H | 2.704350671 | -1.780803516 | 1.276084459  |
| H | 4.444978389 | -1.935016426 | 1.589983449  |
| H | 1.773293139 | -1.347993706 | -1.128198114 |

---

**Supplementary Table 48 | Cartesian coordinate of the product complex for protonation of XI.  
Units are presented in Å.**

SCF energy (in toluene) = -3050.83838305 hartree

ZPE = 0.806890 hartree

```

-----
Atom          Coordinates (Angstroms)
          X           Y           Z
-----
Mo    -0.487588874    0.042074193   -0.106607041
P     -1.449439632   -2.277831768    0.523800724
N     -2.046256271   -0.22265206    -1.717345387
P     -0.732831082    2.400121757   -0.924097019
N      0.969405829   -0.312715066   -0.90629951
H     -0.422424807   -5.862204588   -0.459432505
H     -2.050085219   -5.184940452   -0.343132865
C     -1.031719522   -5.108195935    0.058776713
H     -1.207429439   -3.619763282   -2.233936794
H     -1.052856568   -5.382782397    1.117820363
H      0.419550812   -4.291896421   -2.095237898
C     -0.25293835    -3.516293012   -1.702145166
H      1.615378782   -4.482591704    0.048513197
C     -0.398313462   -3.723480519   -0.179185511
H     -3.268067105   -3.231540156   -0.914215027
H      0.180006859   -2.540240298   -1.944799699
H     -3.783315473   -1.864438497    0.050340385
C      1.000136003   -3.675579774    0.471494842
H     -3.011804406   -4.758382527    1.762070307
H      1.501490877   -2.722483471    0.276007768
C     -2.964870375   -2.229891862   -0.586680842
H     -4.366638915   -2.399472962   -2.868716008
H      0.963596032   -3.816157508    1.556361867
H     -4.211949636   -3.486301354    1.45517297
H      2.023326696    1.885143037   -1.822163619
C     -3.38101944    -3.788444184    2.104198922
H      2.356161327    4.403734907    0.032033905
C     -3.731685845   -1.517400292   -2.856841344
H     -3.803465758   -3.937839921    3.107789893
C     -2.88013826    -1.303259216   -1.769026587
H      2.692182555    3.493616235   -2.135827513
H      1.810430399    2.813795176    0.598635442
C      1.765638517    2.903420364   -2.135872579
C      1.472596607    3.767788186    0.184329589

```

|   |              |              |              |
|---|--------------|--------------|--------------|
| H | -4.443882602 | -0.737835765 | -4.740717842 |
| C | -2.27522836  | -2.715036635 | 2.208889782  |
| H | 1.407443419  | 2.878680954  | -3.172618229 |
| C | -3.779365147 | -0.58950506  | -3.892205239 |
| H | 0.845197902  | 4.255721983  | 0.934808048  |
| H | -0.830944899 | -4.184644544 | 2.979778477  |
| H | -3.686480949 | -1.017238359 | 2.025369026  |
| C | 0.763750369  | 3.578529183  | -1.173256086 |
| C | -1.206169874 | -3.182276987 | 3.218101657  |
| C | -2.922939084 | -1.405314905 | 2.715781306  |
| H | -3.434243624 | -1.611438784 | 3.666314796  |
| H | 1.268284884  | 5.52679641   | -1.962366848 |
| C | -2.974461355 | 0.543479884  | -3.810055048 |
| H | -0.355297183 | -2.498497492 | 3.28411476   |
| C | -2.114202534 | 0.708305558  | -2.722057809 |
| C | 0.358194186  | 4.942731599  | -1.766020816 |
| H | -0.174793059 | 4.843106298  | -2.720647748 |
| H | -1.663165481 | -3.235024643 | 4.21574418   |
| H | -2.998586775 | 1.300728094  | -4.589211235 |
| H | -2.184993427 | -0.623650651 | 2.913663731  |
| H | -1.218271134 | 4.984147314  | 0.809941968  |
| C | -1.223329983 | 1.924580564  | -2.670323835 |
| H | -0.261442234 | 5.531678497  | -1.081958751 |
| H | -0.272549644 | 1.672375776  | -3.157892981 |
| H | -1.218476033 | 3.490135565  | 1.781348803  |
| C | -1.802734298 | 4.09889016   | 1.080419212  |
| H | -1.669609134 | 2.740666998  | -3.251235052 |
| C | -2.250432354 | 3.290349232  | -0.156169515 |
| H | -2.758916917 | 1.549017562  | 1.098267283  |
| H | -2.698047603 | 4.451263247  | 1.611479476  |
| C | -3.221572384 | 2.190057061  | 0.334212119  |
| H | -2.364766872 | 4.989696839  | -1.56445049  |
| H | -3.421291317 | 3.624600824  | -1.989606275 |
| C | -2.996467295 | 4.195817418  | -1.154278359 |
| H | -4.088864042 | 2.669141374  | 0.810209114  |
| H | -3.60266621  | 1.567026703  | -0.482922362 |
| H | -3.836071579 | 4.679217615  | -0.635080332 |
| S | 0.593599231  | 0.22627369   | 3.095204394  |
| O | -0.33633815  | 0.111553389  | 4.22331046   |
| O | 1.463772527  | -0.914108337 | 2.76117136   |
| O | -0.085679439 | 0.835394957  | 1.835509176  |
| C | 1.731992114  | 1.642085874  | 3.528619612  |
| F | 2.694946888  | 1.764264932  | 2.594461274  |
| F | 1.042456604  | 2.789128758  | 3.585227975  |
| F | 2.302314729  | 1.40615207   | 4.708015492  |
| C | 3.70909668   | -1.27450467  | -2.960461609 |
| N | 3.480070701  | -0.873582653 | -1.690200385 |

|   |             |              |              |
|---|-------------|--------------|--------------|
| C | 4.478887491 | -0.862647394 | -0.77858559  |
| C | 5.767751508 | -1.281601508 | -1.130354456 |
| C | 6.018286644 | -1.70308325  | -2.43416428  |
| C | 4.978354785 | -1.695873861 | -3.364133304 |
| H | 5.141992717 | -2.012401288 | -4.391187821 |
| H | 7.014299916 | -2.030931328 | -2.725396919 |
| H | 6.557717548 | -1.269365996 | -0.383890371 |
| C | 2.542650955 | -1.246634681 | -3.915967745 |
| H | 2.858688545 | -1.509857856 | -4.930627123 |
| H | 1.763071306 | -1.955914441 | -3.607464441 |
| H | 2.084800274 | -0.249163652 | -3.945985989 |
| C | 4.157204147 | -0.362123066 | 0.603393183  |
| H | 3.910614311 | 0.707360455  | 0.577840184  |
| H | 3.293857384 | -0.875413547 | 1.043748632  |
| H | 5.012341653 | -0.491967259 | 1.274672846  |
| H | 2.023651307 | -0.526018499 | -1.234353702 |

---

**Supplementary Table 49 | Cartesian coordinate of the reactant complex for coordination of dinitrogen to XII. Units are presented in Å.**

SCF energy (in toluene) = -2833.65797456 hartree

ZPE = 0.667056 hartree

```

-----
Atom          Coordinates (Angstroms)
          X           Y           Z
-----
Mo    -0.098363812    0.589512026    0.342224076
P      0.447304354   -0.857238664    2.399874949
N      1.94945628    1.097831266    0.76690574
P      0.460438132    2.027091404   -1.665961838
N     -1.357752767    1.547878619    1.113655134
H     -0.881831866   -1.768744088    5.921656369
H      0.659357657   -1.013673703    5.49114931
C     -0.124800964   -1.690720389    5.126984971
H     -0.839075639    0.935136494    4.5380186
H      0.311594621   -2.686949227    4.999239898
H     -2.247898814   -0.036424278    4.972344426
C     -1.517414562    0.154216585    4.172870151
H     -2.658755125   -2.232136419    4.17117396
C     -0.803321352   -1.173760206    3.841903396
H      0.846880086    1.278208715    3.421057713
H     -2.069506828    0.532106785    3.307493891
H      2.117732464    0.189457806    4.002539399
C     -1.89272615    -2.165726987    3.383884735
H      2.356549349   -2.401290297    4.31481073
H     -2.372587287   -1.83983158    2.45671613
C      1.548306691    0.489637438    3.115361041
H      4.080970125    1.398082087    3.400869112
H     -1.506141198   -3.172857405    3.212470015
H      3.426915804   -1.519189429    3.202508968
H     -0.036262467    3.705539473    0.792251666
C      2.753513504   -2.379786168    3.294771355
H     -1.109336695    5.491657739   -1.354103022
C      3.744446632    1.467664959    2.3685446
H      3.365099052   -3.284418061    3.162090036
C      2.463513534    1.032806267    2.057564718
H      0.614294466    5.290965537    0.3067107
H     -1.787337441    3.87208149   -1.098682738
C      0.683378366    4.205718586    0.138227875
C     -1.032031036    4.437544304   -1.659118219

```

|   |              |              |              |
|---|--------------|--------------|--------------|
| H | 5.587852551  | 2.338194583  | 1.612522793  |
| C | 1.654350903  | -2.368092048 | 2.211734419  |
| H | 1.690995526  | 3.888898487  | 0.42834763   |
| C | 4.584801684  | 1.992271163  | 1.377630306  |
| H | -1.283245644 | 4.388195263  | -2.724245095 |
| H | 0.504867333  | -3.947419898 | 3.238146267  |
| H | 2.915130567  | -1.319373662 | 0.732622011  |
| C | 0.392036035  | 3.928532392  | -1.353758047 |
| C | 0.887414359  | -3.706201856 | 2.239879059  |
| C | 2.347147531  | -2.250262239 | 0.834386939  |
| H | 3.057085088  | -3.084815536 | 0.732456376  |
| H | 1.332237567  | 5.782720401  | -1.952045562 |
| C | 4.085022312  | 2.043161279  | 0.070845073  |
| H | 0.055554155  | -3.724450606 | 1.528420057  |
| C | 2.802957217  | 1.596429719  | -0.215877972 |
| C | 1.435048678  | 4.711340468  | -2.179359063 |
| H | 2.459738497  | 4.424599021  | -1.910794184 |
| H | 1.582119114  | -4.510018612 | 1.955588268  |
| H | 4.699599933  | 2.420879618  | -0.743937365 |
| H | 1.635373776  | -2.329453607 | 0.006905275  |
| H | -2.157490361 | 2.367126713  | -3.147717874 |
| C | 2.282062211  | 1.584517868  | -1.626117577 |
| H | 1.316152769  | 4.593676025  | -3.259164529 |
| H | 2.905042454  | 2.202314146  | -2.283564292 |
| H | -1.948270723 | 0.662113692  | -2.701943168 |
| C | -1.646106587 | 1.435124871  | -3.414731308 |
| H | 2.319762029  | 0.555834794  | -2.014689259 |
| C | -0.110341654 | 1.599415471  | -3.459701566 |
| H | 0.364826877  | -0.525782771 | -3.089983632 |
| H | -2.00461652  | 1.135409458  | -4.41055899  |
| C | 0.520532772  | 0.243374222  | -3.851336888 |
| H | -0.221313109 | 3.593027122  | -4.409883839 |
| H | 1.354092416  | 2.786843254  | -4.603668739 |
| C | 0.270206737  | 2.623700032  | -4.545455588 |
| H | 0.041271696  | -0.107857163 | -4.776352046 |
| H | 1.594121624  | 0.336989762  | -4.059684211 |
| H | -0.051432327 | 2.232475766  | -5.522292052 |
| S | -1.166219253 | -2.442028051 | -0.971121596 |
| O | -0.168233994 | -3.4519462   | -1.35571261  |
| O | -1.967298603 | -2.675501309 | 0.241914767  |
| O | -0.617618147 | -1.006729539 | -1.077746593 |
| C | -2.400105277 | -2.40559762  | -2.369676441 |
| F | -3.320299135 | -1.449796826 | -2.159874514 |
| F | -1.783819256 | -2.153373326 | -3.536519827 |
| F | -3.018310394 | -3.588869047 | -2.45409848  |
| N | -4.752720167 | -0.266405128 | 0.235804597  |
| N | -4.455154026 | 0.187694818  | 1.201045521  |

H    -1.817341005    2.047980795    1.883695759

---



**Supplementary Table 50 | Cartesian coordinate of the transition state for coordination of dinitrogen to XII. Units are presented in Å.**

SCF energy (in toluene) = -2833.65137694 hartree

ZPE = 0.667834 hartree

imaginary frequency: 78i

---

| Atom | Coordinates (Angstroms) |              |              |
|------|-------------------------|--------------|--------------|
|      | X                       | Y            | Z            |
| Mo   | -0.180974764            | 0.62120118   | 0.392570568  |
| P    | 0.386508949             | -0.87039605  | 2.432900129  |
| N    | 1.87792231              | 1.063713035  | 0.736695598  |
| P    | 0.356645565             | 2.051864656  | -1.647176161 |
| N    | -1.068403126            | 1.8299693    | 1.350514135  |
| H    | -1.067824633            | -1.786848316 | 5.908143398  |
| H    | 0.525066683             | -1.112431274 | 5.535101021  |
| C    | -0.285894746            | -1.735767647 | 5.135814497  |
| H    | -0.833556838            | 0.89103199   | 4.701679244  |
| H    | 0.096050463             | -2.751908672 | 4.994651866  |
| H    | -2.365057115            | 0.033791895  | 4.90253165   |
| C    | -1.536943674            | 0.212344754  | 4.201434394  |
| H    | -2.788022618            | -2.168176146 | 4.10005513   |
| C    | -0.896286216            | -1.147454703 | 3.84841496   |
| H    | 0.801349059             | 1.291628146  | 3.392461234  |
| H    | -1.943130838            | 0.714582699  | 3.316945971  |
| H    | 2.07318505              | 0.215878365  | 3.99380788   |
| C    | -2.01430726             | -2.073384684 | 3.323307671  |
| H    | 2.180793361             | -2.446897871 | 4.444627409  |
| H    | -2.480782171            | -1.673177358 | 2.418156028  |
| C    | 1.496582084             | 0.494369703  | 3.104289732  |
| H    | 4.074878994             | 1.287644433  | 3.321111304  |
| H    | -1.655877727            | -3.077459293 | 3.082973156  |
| H    | 3.314379386             | -1.551425095 | 3.407542936  |
| H    | 0.4119794               | 3.661538912  | 0.852967774  |
| C    | 2.632257139             | -2.409230512 | 3.448444371  |
| H    | -1.123821868            | 5.517132802  | -1.103259841 |
| C    | 3.719366981             | 1.361471801  | 2.295672411  |
| H    | 3.24848338              | -3.313295385 | 3.334608797  |
| C    | 2.407212162             | 0.992557984  | 2.017242283  |
| H    | 0.814344273             | 5.303205884  | 0.298386697  |
| H    | -1.722525719            | 3.899991506  | -0.671537104 |

|   |              |              |              |
|---|--------------|--------------|--------------|
| C | 0.933419874  | 4.23115603   | 0.081219864  |
| C | -1.091646565 | 4.452814657  | -1.379197412 |
| H | 5.590802806  | 2.104101014  | 1.485927331  |
| C | 1.597990319  | -2.381045219 | 2.301978284  |
| H | 2.002369287  | 3.998787997  | 0.147301131  |
| C | 4.563130523  | 1.816624882  | 1.27896572   |
| H | -1.532675342 | 4.361563018  | -2.378916725 |
| H | 0.375061327  | -3.94876765  | 3.255724746  |
| H | 3.00361687   | -1.351679837 | 0.949093274  |
| C | 0.367755268  | 3.956432694  | -1.330610315 |
| C | 0.82066452   | -3.713778859 | 2.282254122  |
| C | 2.380274952  | -2.25221898  | 0.974093229  |
| H | 3.050887394  | -3.119745746 | 0.885065312  |
| H | 1.282007216  | 5.804155743  | -1.975530019 |
| C | 4.038668679  | 1.884344057  | -0.015597538 |
| H | 0.033425511  | -3.728709813 | 1.523020281  |
| C | 2.723127712  | 1.51280726   | -0.265891416 |
| C | 1.244130233  | 4.759076633  | -2.316756298 |
| H | 2.279240687  | 4.394157057  | -2.338430198 |
| H | 1.52590122   | -4.522914739 | 2.043384935  |
| H | 4.653564075  | 2.220753703  | -0.847574619 |
| H | 1.725797185  | -2.257079265 | 0.099387457  |
| H | -2.338708842 | 2.292172928  | -2.931557407 |
| C | 2.16327265   | 1.548445096  | -1.661466143 |
| H | 0.860538683  | 4.766054049  | -3.337890766 |
| H | 2.796563829  | 2.153585421  | -2.321747966 |
| H | -2.022555203 | 0.573197835  | -2.622211781 |
| C | -1.805347067 | 1.405534033  | -3.296968836 |
| H | 2.155317316  | 0.524719241  | -2.061406353 |
| C | -0.285875505 | 1.648498774  | -3.428207052 |
| H | 0.330716473  | -0.454458779 | -3.160895809 |
| H | -2.217321333 | 1.156363466  | -4.286038191 |
| C | 0.391298516  | 0.34432994   | -3.904485433 |
| H | -0.594833582 | 3.64661176   | -4.320769243 |
| H | 1.023159486  | 2.963321722  | -4.623802622 |
| C | -0.039954199 | 2.72030817   | -4.5064251   |
| H | -0.126331759 | -0.006635449 | -4.808498863 |
| H | 1.442650662  | 0.507956382  | -4.175258632 |
| H | -0.39125753  | 2.324078886  | -5.470849202 |
| S | -0.885373245 | -2.570130071 | -1.020013867 |
| O | 0.137528402  | -3.581626342 | -1.326360195 |
| O | -1.770286049 | -2.804613301 | 0.136733045  |
| O | -0.337480873 | -1.144110039 | -1.081655875 |
| C | -2.033057546 | -2.600874473 | -2.4915284   |
| F | -3.003579493 | -1.675844306 | -2.361688091 |
| F | -1.362899079 | -2.351256969 | -3.62900986  |
| F | -2.606225764 | -3.805783034 | -2.586135966 |

|   |              |             |             |
|---|--------------|-------------|-------------|
| N | -3.046455975 | 0.0422315   | 0.048373638 |
| N | -4.133412639 | 0.12750276  | 0.247774175 |
| H | -1.039124668 | 2.612776969 | 2.020340571 |

---

**Supplementary Table 51 | Cartesian coordinate of the reactant complex for protonation of XIV. Units are presented in Å.**

SCF energy (in toluene) = -3161.50806660 hartree

ZPE = 0.842892 hartree

-----

| Atom | Coordinates (Angstroms) |              |              |
|------|-------------------------|--------------|--------------|
|      | X                       | Y            | Z            |
| Mo   | -0.591757089            | 0.540795729  | 0.610906259  |
| P    | 0.050652003             | -0.99675011  | 2.552221543  |
| N    | 1.521457456             | 1.150166406  | 1.00062542   |
| P    | -0.061602743            | 2.398500607  | -1.240937682 |
| H    | -1.200459949            | -2.133586295 | 6.038292077  |
| H    | 0.30078494              | -1.287225343 | 5.645453757  |
| C    | -0.447999906            | -1.98643249  | 5.250378351  |
| H    | -1.302218141            | 0.614794917  | 4.77579524   |
| H    | 0.033661224             | -2.955207106 | 5.085947351  |
| H    | -2.647534305            | -0.445310288 | 5.179517955  |
| C    | -1.94260665             | -0.184840516 | 4.378368106  |
| H    | -2.944627172            | -2.638858162 | 4.253042335  |
| C    | -1.153684874            | -1.454799509 | 3.986697919  |
| H    | 0.441128321             | 1.155936939  | 3.664321076  |
| H    | -2.542329152            | 0.196841909  | 3.54497426   |
| H    | 1.703374679             | 0.041260026  | 4.166349674  |
| C    | -2.176140247            | -2.498540923 | 3.47975008   |
| H    | 2.012594472             | -2.517295582 | 4.41223417   |
| H    | -2.675731061            | -2.179990906 | 2.560314811  |
| C    | 1.127523425             | 0.381533931  | 3.29971111   |
| H    | 3.749902696             | 1.111737086  | 3.549226819  |
| H    | -1.721958788            | -3.473167403 | 3.289956092  |
| H    | 3.087074181             | -1.556106501 | 3.370683645  |
| H    | 0.591228984             | 3.756881286  | 1.316477053  |
| C    | 2.432397934             | -2.434920953 | 3.406001778  |
| H    | -1.205389834            | 5.943846513  | -0.37629213  |
| C    | 3.373904993             | 1.263385248  | 2.540832509  |
| H    | 3.074417488             | -3.31298885  | 3.24907875   |
| C    | 2.042590711             | 0.955995932  | 2.251763696  |
| H    | 0.788104939             | 5.462120248  | 0.883015913  |
| H    | -1.876857063            | 4.384331648  | 0.128642827  |
| C    | 0.908848032             | 4.432573654  | 0.518365347  |
| C    | -1.286677512            | 4.881882662  | -0.650145756 |
| H    | 5.247424138             | 1.977487583  | 1.735333574  |

-----

|   |              |              |              |
|---|--------------|--------------|--------------|
| C | 1.367126256  | -2.416346573 | 2.288431291  |
| H | 1.981855514  | 4.264365913  | 0.37534091   |
| C | 4.204121989  | 1.746756549  | 1.531541774  |
| H | -1.861670866 | 4.833066188  | -1.582311663 |
| H | 0.293297048  | -4.110690069 | 3.203431843  |
| H | 2.651132703  | -1.240718355 | 0.92573857   |
| C | 0.126465402  | 4.282830317  | -0.809902619 |
| C | 0.667986709  | -3.790366818 | 2.225516911  |
| C | 2.10121117   | -2.187047741 | 0.948521515  |
| H | 2.84028334   | -2.991570907 | 0.826175332  |
| H | 1.183063336  | 6.082988364  | -1.371332193 |
| C | 3.674709224  | 1.925878089  | 0.254223518  |
| H | -0.154002798 | -3.808091186 | 1.503217725  |
| C | 2.329584369  | 1.638727671  | 0.012155594  |
| C | 0.924778061  | 5.121096593  | -1.837081408 |
| H | 1.870035422  | 4.645323943  | -2.127614243 |
| H | 1.409259118  | -4.536433065 | 1.90667345   |
| H | 4.29559673   | 2.288507143  | -0.560485141 |
| H | 1.438323121  | -2.231611834 | 0.081152984  |
| H | -2.803712242 | 2.743318477  | -2.442094553 |
| C | 1.726408388  | 1.822027689  | -1.352159341 |
| H | 0.361401451  | 5.346205844  | -2.74198757  |
| H | 2.362141249  | 2.468259937  | -1.969255028 |
| H | -2.453962311 | 1.014752068  | -2.248004524 |
| C | -2.268774161 | 1.888861684  | -2.877255079 |
| H | 1.679014915  | 0.843159526  | -1.847640368 |
| C | -0.763641688 | 2.188893597  | -3.043298034 |
| H | -0.063065903 | 0.089796726  | -3.135549278 |
| H | -2.711353817 | 1.696248178  | -3.864685906 |
| C | -0.057307318 | 1.001504457  | -3.73415782  |
| H | -1.172821091 | 4.280423093  | -3.640224811 |
| H | 0.42168709   | 3.678252949  | -4.166613444 |
| C | -0.621971745 | 3.399532966  | -3.986295686 |
| H | -0.584977398 | 0.785400589  | -4.673367719 |
| H | 0.978401185  | 1.249900599  | -3.998564716 |
| H | -1.052608562 | 3.116973608  | -4.957485177 |
| S | -1.053856625 | -2.188264675 | -1.185703006 |
| O | 0.0003516    | -2.952027685 | -1.851606366 |
| O | -1.674112309 | -2.688697658 | 0.047398792  |
| O | -0.560013347 | -0.675239704 | -1.053070242 |
| C | -2.455791647 | -2.022865209 | -2.418153833 |
| F | -3.405211227 | -1.213666185 | -1.923820596 |
| F | -2.005675376 | -1.517450921 | -3.569980345 |
| F | -2.969729334 | -3.23113778  | -2.62849271  |
| N | -2.563408531 | 0.018026103  | 0.81657294   |
| N | -3.645499389 | -0.242441875 | 0.997188664  |
| N | -1.43218539  | 2.220119465  | 1.931231594  |

|   |              |             |              |
|---|--------------|-------------|--------------|
| H | -0.81129501  | 3.024891788 | 2.024198432  |
| H | -1.605264192 | 1.883893709 | 2.881521027  |
| C | -5.130087821 | 3.750826582 | 1.033542335  |
| N | -4.036430609 | 3.870847176 | 1.817168233  |
| C | -4.044855353 | 4.778420213 | 2.818805216  |
| C | -5.150676063 | 5.5975835   | 3.069573927  |
| C | -6.279725016 | 5.477536634 | 2.260348856  |
| C | -6.269252068 | 4.543648784 | 1.227770831  |
| H | -7.129918126 | 4.422056931 | 0.574467884  |
| H | -7.152432728 | 6.105054423 | 2.431398249  |
| H | -5.120968683 | 6.316856514 | 3.88431568   |
| C | -2.801303885 | 4.883262322 | 3.670214896  |
| H | -2.91237147  | 5.64921674  | 4.445076365  |
| H | -2.585268722 | 3.930194955 | 4.173211238  |
| H | -1.925963499 | 5.14800678  | 3.060300846  |
| C | -5.087346235 | 2.713120156 | -0.058167018 |
| H | -5.894446926 | 2.862238044 | -0.783756573 |
| H | -4.128308669 | 2.747400638 | -0.589353396 |
| H | -5.191691727 | 1.701725206 | 0.357908227  |
| H | -2.345988924 | 2.634430897 | 1.648508596  |

---

**Supplementary Table 52 | Cartesian coordinate of the transition state for protonation of XIV.  
Units are presented in Å.**

SCF energy (in toluene) = -3161.48814983 hartree

ZPE = 0.840082 hartree

imaginary frequency: 361i

---

| Atom | Coordinates (Angstroms) |              |              |
|------|-------------------------|--------------|--------------|
|      | X                       | Y            | Z            |
| Mo   | -0.670013889            | 0.730333195  | 0.634886974  |
| P    | -0.027769099            | -0.830962002 | 2.57640244   |
| N    | 1.49234963              | 1.232271616  | 0.948777458  |
| P    | -0.062980416            | 2.442456158  | -1.333781766 |
| H    | -1.30016617             | -1.875439944 | 6.089938372  |
| H    | 0.228737842             | -1.088029796 | 5.676183721  |
| C    | -0.545701416            | -1.768037153 | 5.297004606  |
| H    | -1.310421077            | 0.843143626  | 4.787645543  |
| H    | -0.09746535             | -2.755359196 | 5.147779516  |
| H    | -2.706216085            | -0.159971383 | 5.187022319  |
| C    | -1.980557308            | 0.066509109  | 4.39318215   |
| H    | -3.065868197            | -2.353753492 | 4.304343715  |
| C    | -1.234253149            | -1.235019246 | 4.0252004    |
| H    | 0.439684909             | 1.330627619  | 3.621971825  |
| H    | -2.544109537            | 0.462612144  | 3.541479413  |
| H    | 1.685658324             | 0.197059698  | 4.144869828  |
| C    | -2.289687055            | -2.251505942 | 3.531902646  |
| H    | 1.887897011             | -2.387634889 | 4.456999142  |
| H    | -2.772172968            | -1.931045042 | 2.604013114  |
| C    | 1.103202784             | 0.528272224  | 3.278749395  |
| H    | 3.746365381             | 1.160426133  | 3.475074138  |
| H    | -1.866822873            | -3.243457146 | 3.359633923  |
| H    | 2.990701464             | -1.475288632 | 3.401642638  |
| H    | 0.657801662             | 3.865391421  | 1.147939529  |
| C    | 2.308554355             | -2.332426553 | 3.449219359  |
| H    | -1.094958609            | 6.047093075  | -0.598385608 |
| C    | 3.365890287             | 1.304541903  | 2.467191086  |
| H    | 2.922202526             | -3.232557679 | 3.303439611  |
| C    | 2.018721093             | 1.045686049  | 2.19960361   |
| H    | 0.913795261             | 5.550475868  | 0.658219963  |
| H    | -1.757143532            | 4.516298373  | 0.00965459   |
| C    | 0.995013332             | 4.504761498  | 0.328296619  |

|   |              |              |              |
|---|--------------|--------------|--------------|
| C | -1.200566272 | 4.974365579  | -0.817181766 |
| H | 5.25885012   | 1.922077591  | 1.628585303  |
| C | 1.242987847  | -2.29614213  | 2.332012506  |
| H | 2.060081573  | 4.296638303  | 0.178430421  |
| C | 4.205276594  | 1.72847242   | 1.439506774  |
| H | -1.808867343 | 4.885321622  | -1.725672634 |
| H | 0.124180085  | -3.946013581 | 3.274044613  |
| H | 2.561656799  | -1.180715409 | 0.953000348  |
| C | 0.193677095  | 4.336883217  | -0.986489545 |
| C | 0.503084818  | -3.649484141 | 2.289918166  |
| C | 1.986041967  | -2.111020105 | 0.989943275  |
| H | 2.703047651  | -2.937869383 | 0.885271478  |
| H | 1.29766679   | 6.08626752   | -1.617300988 |
| C | 3.671125384  | 1.892403588  | 0.161635308  |
| H | -0.321965183 | -3.650955495 | 1.57120572   |
| C | 2.313842606  | 1.651475107  | -0.057644497 |
| C | 0.994351277  | 5.122410673  | -2.051519072 |
| H | 1.914839443  | 4.605355743  | -2.351258661 |
| H | 1.220849269  | -4.420926477 | 1.977325028  |
| H | 4.29799486   | 2.206143591  | -0.669030326 |
| H | 1.325181742  | -2.153338468 | 0.121414431  |
| H | -2.783520922 | 2.79448643   | -2.63967392  |
| C | 1.704687533  | 1.80621195   | -1.421578119 |
| H | 0.418371043  | 5.34374037   | -2.950035844 |
| H | 2.356020621  | 2.40532109   | -2.069520333 |
| H | -2.460615511 | 1.075447284  | -2.321918321 |
| C | -2.2502407   | 1.905206279  | -3.001191672 |
| H | 1.621521262  | 0.809223674  | -1.872707187 |
| C | -0.738005683 | 2.175189945  | -3.144324187 |
| H | -0.084482481 | 0.060579866  | -3.13960123  |
| H | -2.669570705 | 1.652934416  | -3.985469194 |
| C | -0.047938515 | 0.945849332  | -3.776255073 |
| H | -1.097649892 | 4.248056404  | -3.830906257 |
| H | 0.492778946  | 3.596489724  | -4.306108932 |
| C | -0.558606917 | 3.343432123  | -4.133020692 |
| H | -0.567593427 | 0.702551288  | -4.713262697 |
| H | 0.996588227  | 1.160057378  | -4.035407827 |
| H | -0.978396826 | 3.031060038  | -5.100076462 |
| S | -1.153682804 | -2.089511462 | -1.11468473  |
| O | -0.131179722 | -2.920858924 | -1.753752491 |
| O | -1.804505711 | -2.548830494 | 0.121077381  |
| O | -0.630508692 | -0.609491868 | -1.020848854 |
| C | -2.542779193 | -1.939494639 | -2.359410969 |
| F | -3.484856014 | -1.093889346 | -1.905176721 |
| F | -2.081656272 | -1.481604727 | -3.529434273 |
| F | -3.08661     | -3.141680633 | -2.537512688 |
| N | -2.638226393 | 0.211690337  | 0.801881195  |



|   |              |              |              |
|---|--------------|--------------|--------------|
| N | -3.719755097 | -0.054442225 | 0.994929608  |
| N | -1.404377736 | 2.367735252  | 1.834785308  |
| H | -0.80966558  | 3.197710848  | 1.831416127  |
| H | -1.467558398 | 2.060747353  | 2.80830082   |
| C | -4.791504536 | 3.526880425  | 1.052472431  |
| N | -3.829696385 | 3.543705078  | 2.008009354  |
| C | -4.00232223  | 4.167358746  | 3.206279925  |
| C | -5.207002534 | 4.809516616  | 3.475319277  |
| C | -6.221795947 | 4.806007385  | 2.515042046  |
| C | -6.010749861 | 4.165441733  | 1.298760886  |
| H | -6.778700059 | 4.150533209  | 0.529949225  |
| H | -7.167241549 | 5.305074401  | 2.716476204  |
| H | -5.342397765 | 5.308842384  | 4.430572268  |
| C | -2.875151409 | 4.135581677  | 4.20237902   |
| H | -3.107502659 | 4.780846523  | 5.054824326  |
| H | -2.713567163 | 3.119117385  | 4.585883978  |
| H | -1.934030459 | 4.481012807  | 3.757701409  |
| C | -4.521514293 | 2.813655624  | -0.237793481 |
| H | -4.883416349 | 3.411302838  | -1.08267616  |
| H | -3.458540892 | 2.603666085  | -0.374583128 |
| H | -5.05341453  | 1.853233706  | -0.257006893 |
| H | -2.814259351 | 3.007278402  | 1.825859164  |

---

**Supplementary Table 53 | Cartesian coordinate of the product complex for protonation of XIV.  
Units are presented in Å.**

SCF energy (in toluene) = -3161.50809391 hartree

ZPE = 0.843324 hartree

```

-----
Atom          Coordinates (Angstroms)
          X           Y           Z
-----
Mo    -0.551514869    0.641235399    0.569535989
P      0.042143238   -0.845332904    2.561690192
N      1.589756008    1.179481236     0.91626541
P      0.027560862    2.407821275   -1.351935219
H     -1.248149996   -1.788587626    6.091914379
H      0.29589136   -1.042074721    5.662619932
C     -0.493809559   -1.711128781    5.295851469
H     -1.194616175    0.908076776    4.751612108
H     -0.067705868   -2.71026552     5.160861024
H     -2.61635942   -0.047380241    5.159109367
C     -1.883948598     0.14536774     4.363148241
H     -3.027051101   -2.258770167    4.327872059
C     -1.175601389   -1.183430904    4.017826894
H      0.559918182    1.320655783     3.604286002
H     -2.438380315    0.549932006     3.509886292
H      1.7729373     0.159506907     4.112431417
C     -2.255310815   -2.185164459     3.548361856
H      1.932458452   -2.404872128     4.469270737
H     -2.740587039   -1.870219648     2.620286378
C      1.198245591    0.502598031     3.246086117
H      3.850509321    1.119943156     3.436561506
H     -1.853637285   -3.188111324     3.388862061
H      3.052553952   -1.535113404     3.395408901
H      0.777059772    3.796048874     1.157082197
C      2.351666442     -2.3760736     3.459809527
H     -1.005863413    6.005566607    -0.56140065
C      3.467520558     1.25867944     2.428981079
H      2.945816504   -3.291362944     3.32907678
C      2.12060687     1.000719997     2.166155008
H      0.987055282    5.492935027     0.689497013
H     -1.723761771    4.477475984    -0.025660587
C      1.082949899    4.455377228     0.340273924
C     -1.119547992    4.941902684    -0.815297673
H      5.35803523     1.871658586     1.580419005

```

|   |              |              |              |
|---|--------------|--------------|--------------|
| C | 1.284334817  | -2.338005143 | 2.344488455  |
| H | 2.149838465  | 4.2681139    | 0.175937841  |
| C | 4.303564232  | 1.678875593  | 1.396265708  |
| H | -1.701399481 | 4.890743678  | -1.742963741 |
| H | 0.131149923  | -3.946981583 | 3.316735455  |
| H | 2.608914941  | -1.262700034 | 0.938470917  |
| C | 0.274529235  | 4.296291679  | -0.973071653 |
| C | 0.516207072  | -3.676190293 | 2.327621819  |
| C | 2.025281347  | -2.187321884 | 0.997240281  |
| H | 2.73443451   | -3.022384116 | 0.906477027  |
| H | 1.377048205  | 6.049852733  | -1.593607599 |
| C | 3.763596864  | 1.844329236  | 0.121555685  |
| H | -0.309316147 | -3.673952774 | 1.609451821  |
| C | 2.405238574  | 1.605296897  | -0.095325104 |
| C | 1.080103169  | 5.086426619  | -2.032465619 |
| H | 2.004123003  | 4.573420788  | -2.327993177 |
| H | 1.217169418  | -4.468109197 | 2.028644459  |
| H | 4.387522178  | 2.158415578  | -0.711115648 |
| H | 1.360802675  | -2.241666894 | 0.131902344  |
| H | -2.71342639  | 2.801251488  | -2.53599041  |
| C | 1.794303236  | 1.771783164  | -1.458519283 |
| H | 0.507977398  | 5.308322879  | -2.932927967 |
| H | 2.44552699   | 2.37799652   | -2.099660182 |
| H | -2.415418572 | 1.067517835  | -2.307980825 |
| C | -2.208324016 | 1.921938071  | -2.956764721 |
| H | 1.708293885  | 0.781414033  | -1.924573912 |
| C | -0.695480244 | 2.167874374  | -3.141140684 |
| H | -0.062011625 | 0.046089467  | -3.167083705 |
| H | -2.66422963  | 1.721866939  | -3.936657347 |
| C | -0.034545477 | 0.935674633  | -3.797811237 |
| H | -1.045163539 | 4.249902364  | -3.806136652 |
| H | 0.53126597   | 3.585840682  | -4.312229398 |
| C | -0.519814068 | 3.342756993  | -4.123026756 |
| H | -0.580250091 | 0.70369874   | -4.722701379 |
| H | 1.005047151  | 1.14192921   | -4.082332602 |
| H | -0.95910788  | 3.041006649  | -5.084501674 |
| S | -1.123429613 | -2.132674711 | -1.135000969 |
| O | -0.100693807 | -2.961610728 | -1.771969642 |
| O | -1.76548885  | -2.564408177 | 0.112467689  |
| O | -0.569054859 | -0.638674194 | -1.053005132 |
| C | -2.516432766 | -1.961533448 | -2.376700872 |
| F | -3.442847966 | -1.109182637 | -1.912052641 |
| F | -2.048935648 | -1.506568687 | -3.542611698 |
| F | -3.066511689 | -3.159655353 | -2.550937968 |
| N | -2.545714215 | 0.190098449  | 0.780825026  |
| N | -3.637627315 | -0.028496199 | 0.952600532  |
| N | -1.333596341 | 2.411863694  | 1.786075917  |

|   |              |             |              |
|---|--------------|-------------|--------------|
| H | -0.87614645  | 3.297331736 | 1.569146524  |
| H | -1.194753004 | 2.261970987 | 2.788604514  |
| C | -5.14114145  | 3.632799449 | 1.118339645  |
| N | -4.144618436 | 3.585138495 | 2.026986241  |
| C | -4.315497759 | 4.197542909 | 3.220231851  |
| C | -5.492827944 | 4.878929255 | 3.542722507  |
| C | -6.523836001 | 4.931250338 | 2.604500537  |
| C | -6.345608831 | 4.302529208 | 1.376067232  |
| H | -7.124863338 | 4.323319067 | 0.617782264  |
| H | -7.449506208 | 5.45775665  | 2.82882413   |
| H | -5.59382778  | 5.361540305 | 4.511877361  |
| C | -3.175348263 | 4.120032966 | 4.208167977  |
| H | -3.401271787 | 4.681061341 | 5.12109012   |
| H | -2.976111166 | 3.078429778 | 4.49761385   |
| H | -2.252156285 | 4.535042135 | 3.780202248  |
| C | -4.929230865 | 2.913566517 | -0.189027169 |
| H | -5.527696986 | 3.360241181 | -0.991390517 |
| H | -3.873879666 | 2.93463082  | -0.481862752 |
| H | -5.223255556 | 1.858265711 | -0.10264844  |
| H | -2.353931748 | 2.622843413 | 1.708400136  |

---

**Supplementary Table 54 | Cartesian coordinate of the transition state for elimination of the ammonia ligand from XVII. Units are presented in Å.**

SCF energy (in toluene) = -3909.60899623 hartree

ZPE = 1.310831 hartree

imaginary frequency: 51*i*

---

| Atom | Coordinates (Angstroms) |              |              |
|------|-------------------------|--------------|--------------|
|      | X                       | Y            | Z            |
| Mo   | -2.58903079             | 0.070012599  | -0.046776179 |
| Mo   | 2.657553379             | 0.023549409  | 0.171806494  |
| P    | 3.271924049             | 2.116711781  | -1.055686633 |
| P    | -3.231564893            | -2.073008172 | -1.228988968 |
| N    | -4.82580549             | 0.157140233  | 0.003526994  |
| N    | 4.876214688             | -0.116770939 | 0.130922574  |
| P    | 3.042692367             | -2.163790721 | 1.328428754  |
| P    | -3.00736197             | 2.259788254  | 1.176122604  |
| N    | -0.519990422            | 0.035574895  | -0.03269409  |
| N    | 0.636391075             | 0.035272928  | 0.041643107  |
| N    | -2.558952102            | 1.552876705  | -2.844890528 |
| N    | -2.568482667            | 1.011030631  | -1.843112597 |
| N    | -2.574491809            | -0.879256747 | 1.751514672  |
| N    | -2.571196262            | -1.427712257 | 2.747842661  |
| N    | 2.688595597             | 0.921893736  | 1.886163761  |
| N    | 2.726768769             | 1.47321419   | 2.895008633  |
| H    | 2.622580609             | 3.542367364  | -4.637799778 |
| H    | -2.720890414            | -3.587575148 | -4.800772257 |
| H    | -4.064647941            | -2.587499828 | -4.242867676 |
| H    | 4.016461019             | 2.595977661  | -4.106038556 |
| C    | 3.244282922             | 3.296417285  | -3.76290893  |
| C    | -3.308011695            | -3.309472309 | -3.911728748 |
| H    | -2.368610442            | -0.739242746 | -3.863118099 |
| H    | 2.45233542              | 0.640904965  | -3.479113081 |
| H    | -3.823522704            | -4.210715545 | -3.569017706 |
| H    | 3.74002036              | 4.218181787  | -3.446808565 |
| H    | -1.081893721            | -1.838726017 | -4.373502926 |
| H    | 1.173560018             | 1.658744356  | -4.179638432 |
| C    | 1.703699687             | 1.406709068  | -3.248279961 |
| C    | -1.660331657            | -1.49191432  | -3.502646953 |
| H    | 0.558562328             | 3.788272559  | -3.185595421 |
| H    | -0.639992111            | -3.915178425 | -3.381138682 |

---

|   |              |              |              |
|---|--------------|--------------|--------------|
| C | 2.349431984  | 2.679647552  | -2.667960674 |
| C | -2.359803577 | -2.703816645 | -2.85528689  |
| H | -4.541143798 | -0.755055885 | -2.757383008 |
| H | 4.544843872  | 0.795257832  | -2.614042557 |
| H | 0.980423745  | 0.972201956  | -2.549609369 |
| H | -0.979431863 | -0.993804347 | -2.802822538 |
| H | 5.549235701  | 2.192876369  | -2.205967484 |
| H | -5.531091403 | -2.153173948 | -2.322704167 |
| C | 1.211424672  | 3.654688621  | -2.310117118 |
| C | -1.261286425 | -3.722878201 | -2.49287733  |
| H | 3.609060386  | 5.290916456  | -1.61494054  |
| H | -3.647887178 | -5.259779345 | -1.728921494 |
| H | 0.590130563  | 3.265265537  | -1.493928662 |
| H | -0.60283414  | -3.342771926 | -1.700986487 |
| C | 4.881495718  | 1.431575536  | -1.781098256 |
| C | -4.855651049 | -1.389367394 | -1.915640424 |
| H | 7.560358144  | 1.085737477  | -1.560473742 |
| H | -7.531744074 | -1.074948599 | -1.624879162 |
| H | 1.579939054  | 4.646018179  | -2.023357312 |
| H | -1.664477849 | -4.687476101 | -2.16807122  |
| H | 5.208737654  | 4.514296709  | -1.640111614 |
| H | -5.227532817 | -4.444288415 | -1.713069949 |
| H | -4.48034249  | 2.615456874  | -1.359932006 |
| H | 4.229839451  | -2.475326926 | -1.351672058 |
| C | 4.386172934  | 4.838934926  | -0.989024417 |
| C | -4.391761841 | -4.779098903 | -1.08484066  |
| H | -2.619987042 | 5.179919767  | -1.283207016 |
| H | 2.414765438  | -4.857800632 | -1.300759149 |
| C | 7.017506806  | 0.511019655  | -0.812926764 |
| C | -6.976847184 | -0.501936039 | -0.88516363  |
| H | 4.783148438  | 5.636559399  | -0.342289727 |
| H | -4.786251325 | -5.557533921 | -0.41375997  |
| C | 5.624243561  | 0.581812537  | -0.784410826 |
| C | -5.581646669 | -0.545464095 | -0.898445099 |
| H | -4.862550572 | 4.342530447  | -1.428717088 |
| H | 4.67832562   | -4.192509586 | -1.451115764 |
| H | -2.008234749 | 3.522733326  | -1.386835067 |
| H | 1.720465499  | -3.244009871 | -0.995615805 |
| C | -4.683628171 | 3.496842001  | -0.747532787 |
| C | 4.521658573  | -3.349470412 | -0.759288524 |
| C | -2.316633606 | 4.304703558  | -0.6880401   |
| C | 2.162834093  | -4.125390022 | -0.51699184  |
| H | -8.729382274 | 0.304977203  | 0.098218821  |
| H | 8.783393158  | -0.349162284 | 0.101324361  |
| C | 3.850027159  | 3.699879404  | -0.100347817 |
| C | -3.804675282 | -3.637793764 | -0.230219389 |
| H | -5.613050971 | 3.323850358  | -0.19265639  |

|   |              |              |              |
|---|--------------|--------------|--------------|
| H | 5.485511333  | -3.138004078 | -0.283004344 |
| C | -7.642570335 | 0.263509535  | 0.071894452  |
| C | 7.697351232  | -0.286211613 | 0.107883853  |
| H | -1.445270624 | 4.597923451  | -0.095054318 |
| H | 1.39535377   | -4.579776591 | 0.116544811  |
| H | 1.829235895  | 4.562114784  | 0.138071885  |
| H | -1.801131887 | -4.553344186 | -0.034387147 |
| H | 5.895342681  | 2.986254111  | 0.323342691  |
| H | -5.841417638 | -2.93296865  | 0.240264478  |
| C | -3.507024461 | 3.85645552   | 0.187640896  |
| C | 3.436389702  | -3.743641277 | 0.267193349  |
| C | 2.673826762  | 4.227813277  | 0.749479271  |
| C | -2.616793798 | -4.181973842 | 0.593505485  |
| C | 4.987273145  | 3.285581098  | 0.860377313  |
| C | -4.911306102 | -3.199066883 | 0.755657777  |
| H | 5.248064938  | 4.151551739  | 1.487894578  |
| H | -5.137943219 | -4.04199953  | 1.425748986  |
| H | -4.337440531 | 5.842967832  | 0.395217227  |
| H | 4.235663313  | -5.757987761 | 0.335132187  |
| C | 6.940989675  | -0.999124732 | 1.039730353  |
| C | -6.875031122 | 0.974309089  | 0.994079183  |
| H | 2.315298904  | 3.471951294  | 1.454006798  |
| H | -2.209174926 | -3.426215125 | 1.270264594  |
| C | 5.549440136  | -0.903354539 | 1.034085676  |
| C | -5.481294461 | 0.912453738  | 0.94091637   |
| C | -3.966986551 | 5.044244648  | 1.056018168  |
| C | 3.949648523  | -4.967932487 | 1.047258666  |
| H | -4.790802596 | 4.777214973  | 1.730836511  |
| H | 4.840579531  | -4.733742459 | 1.644595838  |
| H | 3.017448762  | 5.093815407  | 1.336429679  |
| H | -2.965526322 | -5.024677098 | 1.209979307  |
| H | -7.34820586  | 1.586189227  | 1.759017442  |
| H | 7.423298863  | -1.634881467 | 1.779339219  |
| H | 4.692995101  | 2.471179138  | 1.527145917  |
| H | -4.610366774 | -2.353646986 | 1.378319101  |
| H | -1.1811479   | 4.728029791  | 2.021645736  |
| H | 1.22124453   | -4.640298687 | 2.223648884  |
| C | -4.647785299 | 1.694437969  | 1.925194987  |
| C | 4.727337427  | -1.678272955 | 2.031163248  |
| H | -3.156390103 | 5.472493333  | 1.654305358  |
| H | 3.192618457  | -5.394139276 | 1.714192825  |
| H | -5.244287311 | 2.506362914  | 2.361161232  |
| H | 5.310447028  | -2.517378533 | 2.432570624  |
| H | -0.251633066 | 3.287642873  | 1.53817763   |
| H | 0.285554711  | -3.187032485 | 1.791803293  |
| C | -0.850764721 | 3.733601392  | 2.341326805  |
| C | 0.915850175  | -3.64442871  | 2.564397442  |

|   |              |              |              |
|---|--------------|--------------|--------------|
| H | -4.348106188 | 1.034942344  | 2.752982093  |
| H | 4.475056154  | -1.022240023 | 2.877286733  |
| C | -2.019205021 | 2.817070568  | 2.755037933  |
| C | 2.111978656  | -2.744049543 | 2.932289836  |
| H | -0.764419797 | 1.015269601  | 2.680539125  |
| H | 0.859429199  | -0.941151225 | 2.945089621  |
| H | -0.183654698 | 3.871404928  | 3.204323216  |
| H | 0.287439294  | -3.784055547 | 3.456132154  |
| C | -1.403990538 | 1.552798284  | 3.387066289  |
| C | 1.542024412  | -1.481388497 | 3.608697001  |
| H | -3.334715565 | 4.442177077  | 3.496577843  |
| H | 3.456434499  | -4.388795447 | 3.572648595  |
| H | -3.668254943 | 2.854820731  | 4.215142476  |
| H | 3.812872289  | -2.824283071 | 4.329800919  |
| C | -2.874376467 | 3.510668925  | 3.836099801  |
| C | 3.006732162  | -3.46937635  | 3.959497446  |
| H | -0.781392836 | 1.853888147  | 4.242479192  |
| H | 0.980174677  | -1.784390866 | 4.505357591  |
| H | -2.163000348 | 0.858242512  | 3.761885263  |
| H | 2.32019176   | -0.780415944 | 3.926757771  |
| H | -2.228483346 | 3.756814399  | 4.692617877  |
| H | 2.393926794  | -3.745982516 | 4.831232969  |
| N | 2.36947968   | -1.815523547 | -3.124763629 |
| H | 2.478102686  | -2.829155618 | -3.078251846 |
| H | 2.577321469  | -1.546304176 | -4.087868262 |
| H | 1.375778131  | -1.624474772 | -2.987212004 |

---



**Supplementary Table 55 | Cartesian coordinate of the product complex for elimination of the ammonia ligand from XVII. Units are presented in Å.**

SCF energy (in toluene) = -3909.59414048 hartree

ZPE = 1.309396 hartree

-----

| Atom | Coordinates (Angstroms) |              |              |
|------|-------------------------|--------------|--------------|
|      | X                       | Y            | Z            |
| Mo   | -2.624288372            | 0.136416637  | 0.053949422  |
| Mo   | 2.623528343             | 0.01263996   | 0.18633786   |
| P    | 3.168858121             | 1.803472654  | -1.417443345 |
| P    | -3.297214154            | -1.843014158 | -1.391566767 |
| N    | -4.857790983            | 0.267611985  | 0.102144851  |
| N    | 4.864338105             | -0.104892158 | 0.191124275  |
| P    | 2.988704416             | -2.067085365 | 1.461473112  |
| P    | -2.999971883            | 2.177635102  | 1.519161591  |
| N    | -0.559062058            | 0.068871314  | 0.048563771  |
| N    | 0.599513768             | 0.050174655  | 0.098505687  |
| N    | -2.646582241            | 1.927573127  | -2.557856373 |
| N    | -2.617964202            | 1.27967235   | -1.621999226 |
| N    | -2.651600293            | -1.025228268 | 1.72086341   |
| N    | -2.684655192            | -1.692478296 | 2.642079024  |
| N    | 2.745487107             | 1.11374055   | 1.780243644  |
| N    | 2.821399087             | 1.780816991  | 2.712271664  |
| H    | 2.597416181             | 1.891143881  | -5.278712933 |
| H    | -2.835569232            | -2.938433074 | -5.114677923 |
| H    | -4.157815552            | -1.987161935 | -4.433795826 |
| H    | 4.126797395             | 1.657776209  | -4.424091301 |
| C    | 3.140458249             | 2.132538681  | -4.35169859  |
| C    | -3.412339009            | -2.755760014 | -4.194884039 |
| H    | -2.441533956            | -0.226805715 | -3.861317933 |
| H    | 3.086240955             | -0.455569114 | -3.36267065  |
| H    | -3.942022903            | -3.680742928 | -3.953449426 |
| H    | 3.283560289             | 3.217242164  | -4.333050231 |
| H    | -1.16285487             | -1.270581146 | -4.496283408 |
| H    | 1.601130686             | -0.105571934 | -4.262534119 |
| C    | 2.133818863             | 0.089482478  | -3.318877727 |
| C    | -1.736974624            | -1.020026994 | -3.591026122 |
| H    | 0.3786047               | 2.005092377  | -4.018782125 |
| H    | -0.754780184            | -3.459763298 | -3.771844289 |
| C    | 2.331816271             | 1.614428157  | -3.145315801 |
| C    | -2.445371688            | -2.291500875 | -3.085170915 |

-----

|   |              |              |              |
|---|--------------|--------------|--------------|
| H | -4.578228315 | -0.324251534 | -2.749439788 |
| H | 4.855668425  | 0.56867648   | -2.649529224 |
| H | 1.519179899  | -0.327634032 | -2.50798316  |
| H | -1.045785515 | -0.616293511 | -2.844490668 |
| H | 5.548790264  | 2.130934946  | -2.215932649 |
| H | -5.593396067 | -1.7432284   | -2.479095446 |
| C | 0.945406305  | 2.285743981  | -3.118581934 |
| C | -1.356810475 | -3.359918188 | -2.856276012 |
| H | 2.847773909  | 4.695925149  | -2.816169743 |
| H | -3.772096231 | -4.946477366 | -2.250643712 |
| H | 0.356367428  | 1.972306888  | -2.248725195 |
| H | -0.676689186 | -3.076183153 | -2.042794092 |
| C | 4.934941456  | 1.304079467  | -1.834293973 |
| C | -4.903928159 | -1.0455427   | -1.985993524 |
| H | 7.583862138  | 1.229451837  | -1.340121281 |
| H | -7.573038497 | -0.699724889 | -1.680992663 |
| H | 1.015908032  | 3.380268926  | -3.109761861 |
| H | -1.769646023 | -4.349087186 | -2.631193483 |
| H | 4.573719848  | 4.312315362  | -2.630036764 |
| H | -5.332237864 | -4.098420943 | -2.163469119 |
| H | -4.443855119 | 2.935689707  | -0.989371932 |
| H | 4.234214561  | -2.45746324  | -1.187566636 |
| C | 3.665667234  | 4.61441583   | -2.091624306 |
| C | -4.514671046 | -4.5231999   | -1.566720806 |
| H | -2.494544615 | 5.325790187  | -0.608795009 |
| H | 2.137786464  | -4.715406043 | -1.154097514 |
| C | 7.028005257  | 0.630934518  | -0.621050158 |
| C | -7.01294922  | -0.228780316 | -0.876063532 |
| H | 3.846049933  | 5.623311752  | -1.689332813 |
| H | -4.935892518 | -5.360784753 | -0.989983615 |
| C | 5.634013364  | 0.609033547  | -0.695937287 |
| C | -5.61899695  | -0.307900303 | -0.880979151 |
| H | -4.789036315 | 4.65629891   | -0.77445309  |
| H | 4.509963094  | -4.212327722 | -1.296606507 |
| H | -1.907634006 | 3.670792593  | -0.841321462 |
| H | 1.721794688  | -2.991376075 | -1.030688215 |
| C | -4.622333143 | 3.709434954  | -0.239231168 |
| C | 4.414081979  | -3.365502333 | -0.598545609 |
| C | -2.217814552 | 4.39741048   | -0.085885178 |
| C | 1.980263091  | -3.88544915  | -0.44772606  |
| H | -8.756445583 | 0.509976507  | 0.17414082   |
| H | 8.778208329  | -0.10894346  | 0.424085719  |
| C | 3.327494814  | 3.660688163  | -0.932294786 |
| C | -3.910421415 | -3.500851836 | -0.584225087 |
| H | -5.550575708 | 3.467850094  | 0.291760616  |
| H | 5.376995703  | -3.24882947  | -0.086523907 |
| C | -7.6707545   | 0.442838375  | 0.153884419  |

|   |              |              |              |
|---|--------------|--------------|--------------|
| C | 7.692528762  | -0.115703132 | 0.353061307  |
| H | -1.352647992 | 4.621728889  | 0.545097507  |
| H | 1.113507087  | -4.136751789 | 0.172598916  |
| H | 1.153946499  | 4.044988747  | -0.950556998 |
| H | -1.938777943 | -4.494060911 | -0.504166402 |
| H | 5.438715273  | 3.512808271  | -0.297882542 |
| H | -5.934785129 | -2.813839159 | -0.045177726 |
| C | -3.431579072 | 3.89790039   | 0.728301497  |
| C | 3.26001345   | -3.65827182  | 0.385562676  |
| C | 2.007292819  | 4.098874707  | -0.264975694 |
| C | -2.734632744 | -4.161779525 | 0.169798268  |
| C | 4.453382203  | 3.750705373  | 0.122428402  |
| C | -5.01549899  | -3.15912483  | 0.442012994  |
| H | 4.500968206  | 4.782350186  | 0.503273717  |
| H | -5.266131449 | -4.071916611 | 1.003414875  |
| H | -4.168834093 | 5.881503063  | 1.178308924  |
| H | 3.834632748  | -5.749354037 | 0.432954109  |
| C | 6.917305497  | -0.872850034 | 1.231072368  |
| C | -6.897349682 | 1.026485122  | 1.156513956  |
| H | 1.783733241  | 3.477801703  | 0.609021361  |
| H | -2.294722025 | -3.49020005  | 0.911934394  |
| C | 5.524812018  | -0.848435256 | 1.140046227  |
| C | -5.504981398 | 0.933348943  | 1.110255368  |
| C | -3.843973285 | 4.989742254  | 1.736154826  |
| C | 3.612566796  | -4.945463574 | 1.152415541  |
| H | -4.687626541 | 4.679895876  | 2.366567244  |
| H | 4.501799811  | -4.821726247 | 1.784389225  |
| H | 2.098106037  | 5.142686482  | 0.073504956  |
| H | -3.105096934 | -5.050376884 | 0.703669214  |
| H | -7.364416408 | 1.562822519  | 1.979682294  |
| H | 7.383859673  | -1.478916896 | 2.005065502  |
| H | 4.27138011   | 3.09061285   | 0.976204579  |
| H | -4.705694232 | -2.401816526 | 1.165434561  |
| H | -1.097703461 | 4.457810581  | 2.66746985   |
| H | 0.934414602  | -4.31351267  | 2.377974942  |
| C | -4.664730077 | 1.580319867  | 2.182396149  |
| C | 4.703441978  | -1.650930325 | 2.119136939  |
| H | -3.021599998 | 5.300859027  | 2.388004289  |
| H | 2.789533377  | -5.296792212 | 1.783422571  |
| H | -5.245471621 | 2.356214166  | 2.697918274  |
| H | 5.281171136  | -2.515881581 | 2.473876535  |
| H | -0.21243308  | 3.046781468  | 2.039483051  |
| H | 0.1724217    | -2.744757967 | 2.017191864  |
| C | -0.811267888 | 3.421739012  | 2.87826739   |
| C | 0.765165711  | -3.298130173 | 2.755874505  |
| H | -4.396960472 | 0.826801872  | 2.937529668  |
| H | 4.497585167  | -1.026204001 | 3.00089102   |

|   |              |              |              |
|---|--------------|--------------|--------------|
| C | -2.021223327 | 2.508417005  | 3.163789987  |
| C | 2.077295871  | -2.5627272   | 3.094486665  |
| H | -0.840217002 | 0.681246236  | 2.878616364  |
| H | 1.070275247  | -0.613877572 | 3.151889261  |
| H | -0.154834089 | 3.436402006  | 3.76015787   |
| H | 0.151827539  | -3.38667488  | 3.664571946  |
| C | -1.461862041 | 1.155413573  | 3.6437557    |
| C | 1.705151532  | -1.236269339 | 3.788878024  |
| H | -3.2922653   | 4.075026497  | 4.094416863  |
| H | 3.220252364  | -4.369293777 | 3.677100185  |
| H | -3.68725663  | 2.422028386  | 4.602292445  |
| H | 3.814743582  | -2.867595724 | 4.410895303  |
| C | -2.867297612 | 3.092703331  | 4.315331669  |
| C | 2.913830342  | -3.400860214 | 4.082232781  |
| H | -0.836348009 | 1.327559443  | 4.53204118   |
| H | 1.15441068   | -1.460269973 | 4.715124775  |
| H | -2.24986169  | 0.451036669  | 3.930476827  |
| H | 2.583104679  | -0.639228259 | 4.062190715  |
| H | -2.223620239 | 3.207091963  | 5.200748716  |
| H | 2.311880695  | -3.597700341 | 4.98273522   |
| N | 5.738326139  | -1.588227478 | -3.562863119 |
| H | 6.431825385  | -1.446853034 | -2.826341683 |
| H | 6.2432537    | -1.546968428 | -4.449537206 |
| H | 5.410789713  | -2.549688133 | -3.461486605 |

---

**Supplementary Table 56 | Cartesian coordinate of the reactant complex for coordination of dinitrogen to XVIII. Units are presented in Å.**

SCF energy (in toluene) = -3962.54624778 hartree

ZPE = 1.279297 hartree

```

-----
Atom          Coordinates (Angstroms)
          X           Y           Z
-----
Mo    -2.569491425    0.015759051   -0.025604302
Mo     2.665364896   -0.256928488   -0.267710335
P      3.173001668    1.796826612   -1.546120374
P     -3.148728274   -1.970577322   -1.512868268
N     -4.804146263    0.109582542   -0.071052502
N      4.910244065   -0.311762461   -0.31178691
P      3.104118882   -2.11623662    1.288443214
P     -3.03878986    2.034661691    1.437834707
N     -0.508206622   -0.07853243   -0.047687047
N      0.647403364   -0.138387035   -0.127958946
N     -2.488768716    1.838967353   -2.616185552
N     -2.504953917    1.177867588   -1.690233886
N     -2.651367338   -1.152247241    1.632892129
N     -2.722923561   -1.818143309    2.553624124
N      2.641225143   -2.017519677   -2.806253865
N      2.653958336   -1.353891252   -1.868809524
N      3.529336901    2.839731891    4.299313224
N      2.598398304    3.292742638    4.693324644
H      2.568366143    3.368848346   -5.061496226
H     -2.475633742   -3.045028989   -5.20201285
H     -3.848886382   -2.116148197   -4.593695441
H      4.01716115     2.5263859     -4.507039812
C      3.166199111    3.130418823   -4.168370289
C     -3.104803493   -2.873419767   -4.315493359
H     -2.198840513   -0.323987916   -3.91544483
H      2.586239594    0.403572248   -4.133923929
H     -3.631344588   -3.807499395   -4.103681397
H      3.553875731    4.074672115   -3.775152793
H     -0.874317681   -1.343410127   -4.497760101
H      1.234101792    1.356463151   -4.768499036
C      1.773710862    1.082438452   -3.84930992
C     -1.494525035   -1.108875362   -3.620170585
H      0.431032055    3.371053061   -3.70275502
H     -0.445263601   -3.517327474   -3.744066466

```

|   |              |              |              |
|---|--------------|--------------|--------------|
| C | 2.277913428  | 2.368442722  | -3.163225824 |
| C | -2.204022287 | -2.395465177 | -3.156748998 |
| H | -4.389597153 | -0.458092637 | -2.91353395  |
| H | 4.56711697   | 0.64661428   | -3.116795758 |
| H | 1.090669216  | 0.524020579  | -3.203030281 |
| H | -0.840345502 | -0.70705823  | -2.840799463 |
| H | 5.473309168  | 2.067095754  | -2.591644411 |
| H | -5.395847798 | -1.892340738 | -2.696365319 |
| C | 1.045891473  | 3.221633516  | -2.803259088 |
| C | -1.107760121 | -3.442336315 | -2.870045617 |
| H | 3.291499356  | 5.0288456    | -1.876798308 |
| H | -3.523329431 | -5.069058407 | -2.399697642 |
| H | 0.414311885  | 2.722883704  | -2.057984913 |
| H | -0.482161545 | -3.150506023 | -2.0175017   |
| C | 4.836856476  | 1.245799461  | -2.234625939 |
| C | -4.738136442 | -1.188953257 | -2.169668293 |
| H | 7.495683364  | 0.848911689  | -2.178263862 |
| H | -7.42280959  | -0.885770993 | -1.977628765 |
| H | 1.31668054   | 4.214557878  | -2.424800781 |
| H | -1.513636964 | -4.441824634 | -2.679450466 |
| H | 4.943630755  | 4.374380606  | -1.884378576 |
| H | -5.100027528 | -4.247685754 | -2.391892778 |
| H | -4.377586883 | 2.796631692  | -1.12449701  |
| H | 4.158430484  | -3.374212292 | -1.134151108 |
| C | 4.076836622  | 4.595576307  | -1.247854897 |
| C | -4.309145637 | -4.664110833 | -1.754723006 |
| H | -2.48927203  | 5.201334597  | -0.650265076 |
| H | 1.880218387  | -5.365561097 | -0.282791012 |
| C | 6.996517697  | 0.283666625  | -1.393865362 |
| C | -6.905636802 | -0.412975857 | -1.145614682 |
| H | 4.387230408  | 5.374061514  | -0.53344353  |
| H | -4.746485898 | -5.511659921 | -1.205263695 |
| C | 5.609033689  | 0.375725198  | -1.273939812 |
| C | -5.511517763 | -0.470449424 | -1.091186153 |
| H | -4.764025876 | 4.50826184   | -0.908810717 |
| H | 4.287945131  | -5.094068193 | -0.729341748 |
| H | -1.857306141 | 3.558286184  | -0.844916277 |
| H | 1.649781998  | -3.679954435 | -0.792163022 |
| C | -4.604249504 | 3.558896549  | -0.375955924 |
| C | 4.299779959  | -4.077457068 | -0.307880283 |
| C | -2.220131064 | 4.281058588  | -0.109539892 |
| C | 1.83949963   | -4.324327173 | 0.072628857  |
| H | -8.704713636 | 0.288090928  | -0.16622826  |
| H | 8.804436377  | -0.626822524 | -0.620494456 |
| C | 3.596094781  | 3.355139585  | -0.473833753 |
| C | -3.774151482 | -3.637152519 | -0.737375989 |
| H | -5.550500472 | 3.294765479  | 0.110508161  |

|   |              |              |              |
|---|--------------|--------------|--------------|
| H | 5.296434998  | -3.914404537 | 0.121161708  |
| C | -7.618204093 | 0.238729787  | -0.139747375 |
| C | 7.724493459  | -0.532853868 | -0.529143941 |
| H | -1.392631924 | 4.527068629  | 0.563362908  |
| H | 0.987776636  | -4.240935249 | 0.757429232  |
| H | 1.509687621  | 4.054108116  | -0.253721861 |
| H | -1.784691979 | -4.582847393 | -0.558981361 |
| H | 5.665113392  | 2.744069285  | 0.001538512  |
| H | -5.836763993 | -2.9937592   | -0.298615126 |
| C | -3.461589251 | 3.758093299  | 0.646132417  |
| C | 3.178775235  | -3.964907348 | 0.750009263  |
| C | 2.349151743  | 3.716465262  | 0.362733291  |
| C | -2.626462092 | -4.282321812 | 0.072039644  |
| C | 4.71402525   | 2.944307003  | 0.509181971  |
| C | -4.9343736   | -3.317738529 | 0.233017988  |
| H | 4.886254537  | 3.762436864  | 1.224921228  |
| H | -5.191783733 | -4.234089294 | 0.785433616  |
| H | -4.245181182 | 5.728463038  | 1.074941002  |
| H | 3.611646876  | -5.969193782 | 1.447182737  |
| C | 7.022744732  | -1.216811629 | 0.463388414  |
| C | -6.899093924 | 0.825704516  | 0.900787425  |
| H | 2.001172729  | 2.858080908  | 0.953377332  |
| H | -2.246529986 | -3.613489324 | 0.848994199  |
| C | 5.638611223  | -1.078658853 | 0.564759887  |
| C | -5.504787318 | 0.755206436  | 0.913438073  |
| C | -3.936056283 | 4.836312067  | 1.640889947  |
| C | 3.47326433   | -4.966663545 | 1.880571026  |
| H | -4.805210367 | 4.510869186  | 2.227206604  |
| H | 4.391721726  | -4.720938976 | 2.429793965  |
| H | 2.597077108  | 4.528948388  | 1.063120767  |
| H | -3.005310072 | -5.18837998  | 0.569503763  |
| H | -7.410543638 | 1.346331271  | 1.707479786  |
| H | 7.543811258  | -1.848728921 | 1.179586952  |
| H | 4.44657993   | 2.046678252  | 1.081083599  |
| H | -4.675585652 | -2.551110291 | 0.966823434  |
| H | -1.234181193 | 4.342046537  | 2.693350204  |
| H | 0.885392762  | -3.646144635 | 2.940652963  |
| C | -4.720837642 | 1.406295543  | 2.02565275   |
| C | 4.900838506  | -1.719310461 | 1.711552713  |
| H | -3.150188171 | 5.152553797  | 2.333963749  |
| H | 2.650251772  | -5.036315776 | 2.600628836  |
| H | -5.335882148 | 2.167794545  | 2.522523837  |
| H | 5.466655826  | -2.574172818 | 2.104965565  |
| H | -0.304252444 | 2.955660155  | 2.084890327  |
| H | 0.295008316  | -2.176070451 | 2.133563507  |
| C | -0.939299562 | 3.309314639  | 2.907521317  |
| C | 0.869107931  | -2.550734305 | 2.989184798  |

|   |              |              |             |
|---|--------------|--------------|-------------|
| H | -4.471596289 | 0.650473349  | 2.784735288 |
| H | 4.845689749  | -0.983723131 | 2.528544678 |
| C | -2.143453566 | 2.372368665  | 3.133586199 |
| C | 2.287739887  | -1.950775465 | 3.032020771 |
| H | -0.931289228 | 0.557506229  | 2.887722532 |
| H | 1.548691125  | 0.042806883  | 2.476628024 |
| H | -0.321014915 | 3.331698246  | 3.817455752 |
| H | 0.319094356  | -2.274229958 | 3.900910557 |
| C | -1.582966898 | 1.026115194  | 3.631821238 |
| C | 2.157605175  | -0.427475521 | 3.260332513 |
| H | -3.481623107 | 3.910447252  | 4.01181062  |
| H | 3.165785045  | -3.637971598 | 4.156574336 |
| H | -3.871178433 | 2.247838635  | 4.490423594 |
| H | 4.085889567  | -2.129302851 | 4.298326835 |
| C | -3.050493029 | 2.934780029  | 4.248642175 |
| C | 3.075342557  | -2.549532047 | 4.214753608 |
| H | -0.99523727  | 1.204296932  | 4.545336464 |
| H | 1.662051553  | -0.237663337 | 4.224580106 |
| H | -2.37128864  | 0.310733283  | 3.887795564 |
| H | 3.132856928  | 0.078156629  | 3.292610272 |
| H | -2.4526975   | 3.054732048  | 5.165216449 |
| H | 2.550471044  | -2.315487098 | 5.153905244 |

---



**Supplementary Table 57 | Cartesian coordinate of the transition state for coordination of dinitrogen to XVIII. Units are presented in Å.**

SCF energy (in toluene) = -3962.53971198 hartree

ZPE = 1.281230 hartree

imaginary frequency: 64i

---

| Atom | Coordinates (Angstroms) |              |              |
|------|-------------------------|--------------|--------------|
|      | X                       | Y            | Z            |
| Mo   | -2.592612699            | 0.105627233  | 0.035617467  |
| Mo   | 2.649526078             | -0.176206421 | -0.1251175   |
| P    | 3.223020507             | 1.969125262  | -1.297632057 |
| P    | -3.191539086            | -2.033983317 | -1.198971721 |
| N    | -4.83303084             | 0.179464493  | 0.027468642  |
| N    | 4.872901856             | -0.217137021 | -0.050575836 |
| P    | 3.07038783              | -2.296429285 | 1.137488114  |
| P    | -3.056870872            | 2.276368472  | 1.267329669  |
| N    | -0.533389453            | 0.014049     | 0.008763732  |
| N    | 0.621712063             | -0.052356284 | -0.042758633 |
| N    | -2.531876371            | 1.632843098  | -2.74224589  |
| N    | -2.549808938            | 1.074089836  | -1.751807107 |
| N    | -2.604819357            | -0.861019432 | 1.819023546  |
| N    | -2.614475518            | -1.417714416 | 2.812031109  |
| N    | 2.714453328             | -1.64376359  | -2.838191493 |
| N    | 2.679030712             | -1.087652789 | -1.832583523 |
| N    | 2.553729741             | 1.610279071  | 2.922644821  |
| N    | 2.469502998             | 2.192376208  | 3.862287186  |
| H    | 2.708225661             | 3.503938698  | -4.844983344 |
| H    | -2.569020542            | -3.517955801 | -4.75367097  |
| H    | -3.942746955            | -2.54012044  | -4.232693002 |
| H    | 4.064804899             | 2.517329689  | -4.294923133 |
| C    | 3.294054779             | 3.221011445  | -3.95703397  |
| C    | -3.184237471            | -3.25086756  | -3.881053292 |
| H    | -2.297775942            | -0.656554706 | -3.786642467 |
| H    | 2.418148869             | 0.600409818  | -3.893730896 |
| H    | -3.694543577            | -4.16026697  | -3.552978777 |
| H    | 3.79219022              | 4.125383159  | -3.595287786 |
| H    | -0.993601339            | -1.736113749 | -4.299716247 |
| H    | 1.140791699             | 1.682531023  | -4.472864381 |
| C    | 1.688634035             | 1.3525261    | -3.577064796 |
| C    | -1.580598915            | -1.403569427 | -3.430746492 |

---

|   |              |              |              |
|---|--------------|--------------|--------------|
| H | 0.600934927  | 3.742849556  | -3.464681903 |
| H | -0.515761499 | -3.802875499 | -3.29527235  |
| C | 2.346078957  | 2.582717706  | -2.919696693 |
| C | -2.269307876 | -2.631896964 | -2.802880866 |
| H | -4.47304503  | -0.703580984 | -2.738386445 |
| H | 4.580985959  | 0.699470013  | -2.812189531 |
| H | 0.977717528  | 0.864673152  | -2.902543216 |
| H | -0.896139276 | -0.915870247 | -2.72990642  |
| H | 5.528895993  | 2.124392239  | -2.364691621 |
| H | -5.464105181 | -2.110291705 | -2.340514317 |
| C | 1.216515831  | 3.572206437  | -2.569467579 |
| C | -1.158486635 | -3.630299448 | -2.419967251 |
| H | 3.597528207  | 5.172783919  | -1.755330369 |
| H | -3.565757957 | -5.217077404 | -1.725519729 |
| H | 0.554027052  | 3.17371454   | -1.790655004 |
| H | -0.518189984 | -3.236679501 | -1.620828887 |
| C | 4.872613422  | 1.339380433  | -1.966397822 |
| C | -4.802324677 | -1.347704168 | -1.90979083  |
| H | 7.550071805  | 1.075835449  | -1.685431781 |
| H | -7.484832711 | -1.048117752 | -1.688772283 |
| H | 1.59239331   | 4.548328613  | -2.243109208 |
| H | -1.55085388  | -4.60391776  | -2.106783823 |
| H | 5.193298759  | 4.393411135  | -1.688059149 |
| H | -5.152466488 | -4.415776595 | -1.756410725 |
| H | -4.466901336 | 2.662998652  | -1.300367703 |
| H | 4.535713195  | -2.778734471 | -1.377500313 |
| C | 4.328900155  | 4.705446282  | -1.087592408 |
| C | -4.334316516 | -4.746834709 | -1.10344158  |
| H | -2.61595707  | 5.22350496   | -1.150133764 |
| H | 2.564475797  | -5.249535911 | -1.248447653 |
| C | 7.010714211  | 0.485420869  | -0.947690882 |
| C | -6.953910554 | -0.47965768  | -0.928336041 |
| H | 4.680816666  | 5.486733748  | -0.395712899 |
| H | -4.74312632  | -5.5314509   | -0.448298277 |
| C | 5.616078245  | 0.506786049  | -0.952740162 |
| C | -5.558385456 | -0.518066599 | -0.90249674  |
| H | -4.851375384 | 4.389528726  | -1.354345499 |
| H | 4.868634359  | -4.516972133 | -1.379887666 |
| H | -1.984756793 | 3.572699216  | -1.239612973 |
| H | 2.05049669   | -3.562417285 | -1.405803509 |
| C | -4.686606909 | 3.535061883  | -0.680767008 |
| C | 4.706128437  | -3.642997494 | -0.73100971  |
| C | -2.322872382 | 4.349412067  | -0.548453667 |
| C | 2.302640271  | -4.342144521 | -0.68211966  |
| H | -8.737312988 | 0.312138627  | 0.010074448  |
| H | 8.78606918   | -0.314785714 | 0.003535272  |
| C | 3.734747653  | 3.539912578  | -0.274456441 |

|   |              |              |              |
|---|--------------|--------------|--------------|
| C | -3.780317131 | -3.607279219 | -0.224887683 |
| H | -5.628492279 | 3.352057859  | -0.150791697 |
| H | 5.632484373  | -3.479367242 | -0.167384933 |
| C | -7.650012204 | 0.275135874  | 0.01514261   |
| C | 7.698697803  | -0.286846406 | -0.010362335 |
| H | -1.47278621  | 4.649533386  | 0.071828831  |
| H | 1.409717225  | -4.571930406 | -0.091011358 |
| H | 1.759113653  | 4.515683068  | -0.13716053  |
| H | -1.76838336  | -4.491730093 | 0.012410346  |
| H | 5.761001036  | 2.854641758  | 0.261681466  |
| H | -5.833880033 | -2.922701227 | 0.201651536  |
| C | -3.535332847 | 3.886346977  | 0.288991305  |
| C | 3.505281869  | -3.935815016 | 0.196729024  |
| C | 2.502835566  | 4.039986559  | 0.509171863  |
| C | -2.609850007 | -4.151394569 | 0.623233226  |
| C | 4.807363405  | 3.095753066  | 0.744621959  |
| C | -4.913676789 | -3.184482416 | 0.736959461  |
| H | 4.994869312  | 3.917080951  | 1.452984418  |
| H | -5.149190225 | -4.033479421 | 1.396360594  |
| H | -4.378790933 | 5.867195418  | 0.497746042  |
| H | 4.242529624  | -5.951842185 | 0.460411698  |
| C | 6.948252503  | -1.025427639 | 0.904529665  |
| C | -6.912919418 | 0.980620261  | 0.965634559  |
| H | 2.004866533  | 3.219771464  | 1.037312779  |
| H | -2.238515713 | -3.406396987 | 1.331794879  |
| C | 5.554404771  | -0.977915372 | 0.86800881   |
| C | -5.518037613 | 0.923424662  | 0.951693171  |
| C | -4.025456504 | 5.061069318  | 1.158822975  |
| C | 3.896128314  | -5.123207279 | 1.096957632  |
| H | -4.868772686 | 4.78217801   | 1.804108964  |
| H | 4.717265127  | -4.878253866 | 1.783389641  |
| H | 2.815151197  | 4.785620609  | 1.256542996  |
| H | -2.963753451 | -5.015418399 | 1.206515469  |
| H | -7.410584552 | 1.583630007  | 1.722039811  |
| H | 7.43594899   | -1.645036297 | 1.654277686  |
| H | 4.495733175  | 2.217708482  | 1.320004373  |
| H | -4.633805207 | -2.340554988 | 1.371865196  |
| H | -1.293179964 | 4.75987209   | 2.21298891   |
| H | 1.071063045  | -4.57874058  | 2.051083598  |
| C | -4.715484743 | 1.697737339  | 1.967062243  |
| C | 4.738363128  | -1.764708768 | 1.860956572  |
| H | -3.236375653 | 5.485708479  | 1.787798375  |
| H | 3.053559306  | -5.500868479 | 1.686071041  |
| H | -5.326673608 | 2.503274437  | 2.394205919  |
| H | 5.333898426  | -2.590249244 | 2.272824799  |
| H | -0.329814313 | 3.345041838  | 1.734261434  |
| H | 0.277568615  | -3.065965039 | 1.554763911  |

|   |              |              |             |
|---|--------------|--------------|-------------|
| C | -0.959158634 | 3.765841514  | 2.528517652 |
| C | 0.833603065  | -3.55547714  | 2.363735085 |
| H | -4.437198135 | 1.029227599  | 2.795136189 |
| H | 4.470842695  | -1.113117915 | 2.70759967  |
| C | -2.126329613 | 2.824585259  | 2.887617147 |
| C | 2.0903206    | -2.750502964 | 2.748240764 |
| H | -0.864148611 | 1.028192359  | 2.811633015 |
| H | 1.049513039  | -0.821465694 | 2.627720833 |
| H | -0.324496755 | 3.903788575  | 3.416650503 |
| H | 0.161706998  | -3.624385245 | 3.231992087 |
| C | -1.51340212  | 1.557793962  | 3.516713203 |
| C | 1.620662806  | -1.413321514 | 3.351846591 |
| H | -3.479675287 | 4.422049333  | 3.618791388 |
| H | 3.224422961  | -4.489956965 | 3.519044015 |
| H | -3.819115311 | 2.818596385  | 4.297278238 |
| H | 3.768112775  | -2.930656226 | 4.164242849 |
| C | -3.020650998 | 3.488855422  | 3.955614848 |
| C | 2.888776501  | -3.499119832 | 3.834837208 |
| H | -0.911553727 | 1.851428158  | 4.390487821 |
| H | 0.972665759  | -1.610354599 | 4.219026529 |
| H | -2.273494762 | 0.852483158  | 3.867399894 |
| H | 2.464489074  | -0.809690794 | 3.707654928 |
| H | -2.40492936  | 3.726058308  | 4.836884499 |
| H | 2.247174374  | -3.63760415  | 4.718827268 |

---

**Supplementary Table 58 | Cartesian coordinate of the reactant complex for coordination of dinitrogen to XVI. Units are presented in Å.**

SCF energy (in toluene) = -1983.03005450 hartree

ZPE = 0.670536 hartree

-----

| Atom | Coordinates (Angstroms) |              |              |
|------|-------------------------|--------------|--------------|
|      | X                       | Y            | Z            |
| Mo   | 0.421011816             | -0.172212312 | 0.086856761  |
| P    | 0.279975163             | 2.008794371  | 1.155932205  |
| N    | -1.547014002            | -0.319852552 | 1.082737875  |
| P    | -0.427752961            | -2.14991007  | -1.011812183 |
| N    | 2.299759907             | -0.185474602 | -0.583161413 |
| N    | 3.407398453             | -0.240153754 | -0.886725898 |
| H    | 2.188014266             | 4.20354791   | 3.793076154  |
| H    | 0.710764301             | 3.268296464  | 4.048411865  |
| C    | 1.289190755             | 3.812380518  | 3.290444432  |
| H    | 2.056543259             | 1.173072471  | 3.447709577  |
| H    | 0.697146229             | 4.673306972  | 2.969354581  |
| H    | 3.462648559             | 2.215285658  | 3.22389607   |
| C    | 2.598943764             | 1.774806322  | 2.702879409  |
| H    | 3.50866541              | 4.024439475  | 1.619090665  |
| C    | 1.715992917             | 2.900465075  | 2.122094253  |
| H    | -0.205273797            | 1.202188661  | 3.37354324   |
| H    | 2.978588346             | 1.118143495  | 1.911301594  |
| H    | -1.439443325            | 2.395952127  | 3.008169797  |
| C    | 2.583259484             | 3.692524593  | 1.12389559   |
| H    | 0.008485363             | 5.271278406  | 1.044735135  |
| H    | 2.869545897             | 3.074002601  | 0.263626409  |
| C    | -0.879618308            | 1.552162544  | 2.576713424  |
| H    | -3.15687215             | 0.861474371  | 3.833763391  |
| H    | 2.075317938             | 4.589231467  | 0.751407366  |
| H    | -1.385374623            | 4.585655935  | 1.910139583  |
| H    | -0.153684215            | -3.580531614 | 1.5266373    |
| C    | -0.926991677            | 4.714646149  | 0.920584262  |
| H    | 1.65808964              | -5.280906118 | -0.311268405 |
| C    | -2.984323137            | 0.230946914  | 2.963425292  |
| H    | -1.604324542            | 5.352019395  | 0.330703303  |
| C    | -1.838425241            | 0.444638061  | 2.193692525  |
| H    | -0.32613159             | -5.296977009 | 1.118426312  |
| H    | 1.963858167             | -3.553804653 | -0.012973232 |
| C    | -0.598434442            | -4.277375325 | 0.805393104  |

-----

|   |              |              |              |
|---|--------------|--------------|--------------|
| C | 1.429405074  | -4.261897091 | -0.660135772 |
| H | -4.775972526 | -0.961830878 | 3.223012392  |
| C | -0.725432716 | 3.37333134   | 0.193162084  |
| H | -1.687869195 | -4.186549963 | 0.891396407  |
| C | -3.886842256 | -0.776905781 | 2.624288664  |
| H | 1.848760201  | -4.153907167 | -1.666237626 |
| H | 0.958423376  | 4.079212326  | -1.052782039 |
| H | -2.718795701 | 2.648635001  | 0.812697448  |
| C | -0.09522697  | -4.026549869 | -0.63283604  |
| C | -0.028711243 | 3.617310772  | -1.161674394 |
| C | -2.1230755   | 2.783203369  | -0.098611445 |
| H | -2.675674365 | 3.47217264   | -0.755565014 |
| H | -0.628533717 | -6.059202849 | -1.192451612 |
| C | -3.621237575 | -1.524849052 | 1.473129152  |
| H | 0.105345989  | 2.679406853  | -1.71562562  |
| C | -2.480225113 | -1.270088774 | 0.716852704  |
| C | -0.783535379 | -5.035329643 | -1.568811304 |
| H | -1.867586748 | -4.872655942 | -1.632187967 |
| H | -0.643227426 | 4.289430452  | -1.780514463 |
| H | -4.312965393 | -2.296365233 | 1.140695929  |
| H | -2.059408086 | 1.810897978  | -0.602139012 |
| H | 1.028160057  | -3.372099724 | -3.562048842 |
| C | -2.265271145 | -1.971454636 | -0.600957064 |
| H | -0.373105177 | -5.000214241 | -2.584414547 |
| H | -2.836767097 | -2.908477614 | -0.640010532 |
| H | 1.750102703  | -1.868203634 | -2.940446591 |
| C | 0.914681091  | -2.281563652 | -3.519081554 |
| H | -2.678636487 | -1.327594618 | -1.391424133 |
| C | -0.446528355 | -1.865742467 | -2.928218632 |
| H | 0.232471276  | 0.186119082  | -2.511020971 |
| H | 1.002200958  | -1.907655782 | -4.550917063 |
| C | -0.578451666 | -0.329536278 | -3.055995161 |
| H | -1.515148553 | -3.616850333 | -3.742063192 |
| H | -2.577537323 | -2.253599867 | -3.349199937 |
| C | -1.584565815 | -2.52471038  | -3.730303454 |
| H | -0.488474304 | -0.027749012 | -4.111154838 |
| H | -1.546596748 | 0.04089027   | -2.694760483 |
| H | -1.538718021 | -2.184144778 | -4.77683016  |
| H | 1.898543176  | -0.681387419 | 2.459343395  |
| N | 1.208358182  | -1.223979337 | 1.936441696  |
| H | 1.660997406  | -2.101945743 | 1.677907112  |
| H | 0.450883609  | -1.458298711 | 2.583745862  |
| N | 2.524016653  | 2.073817502  | -3.455317036 |
| N | 3.597920113  | 2.028093967  | -3.185851039 |

---

**Supplementary Table 59 | Cartesian coordinate of the transition state for coordination of dinirogen to XVI. Units are presented in Å.**

SCF energy (in toluene) = -1983.02333356 hartree

ZPE = 0.672276 hartree

imaginary frequency: 94i

---

| Atom | Coordinates (Angstroms) |              |              |
|------|-------------------------|--------------|--------------|
|      | X                       | Y            | Z            |
| Mo   | -0.159339036            | -1.67018422  | -0.546120201 |
| P    | -0.293237701            | 0.491081506  | 0.644161216  |
| N    | -2.164276933            | -1.811162776 | 0.414485239  |
| P    | -1.046224076            | -3.661243359 | -1.673843903 |
| N    | 1.773117526             | -1.834372114 | -0.985546098 |
| N    | 2.905677563             | -1.991853244 | -1.097506526 |
| H    | 1.660832414             | 2.426408584  | 3.445900695  |
| H    | 0.20563844              | 1.443773192  | 3.640906858  |
| C    | 0.752460529             | 2.077025391  | 2.930388196  |
| H    | 1.591413673             | -0.518971851 | 2.815965419  |
| H    | 0.139401887             | 2.958109224  | 2.723992856  |
| H    | 2.967040154             | 0.559806424  | 2.608320711  |
| C    | 2.085618894             | 0.148315483  | 2.093427407  |
| H    | 2.909210982             | 2.524490971  | 1.241270602  |
| C    | 1.159662854             | 1.305493499  | 1.658382477  |
| H    | -0.742055826            | -0.51379947  | 2.785078631  |
| H    | 2.437836025             | -0.438091835 | 1.237002061  |
| H    | -1.958455929            | 0.729798238  | 2.565945339  |
| C    | 1.980342613             | 2.225017286  | 0.732468981  |
| H    | -0.683721822            | 3.726842289  | 0.960589522  |
| H    | 2.262244729             | 1.71569676   | -0.198063241 |
| C    | -1.42787267             | -0.078811923 | 2.041787599  |
| H    | -3.703507569            | -0.791127046 | 3.270134627  |
| H    | 1.441993272             | 3.143818066  | 0.474129455  |
| H    | -2.011628846            | 2.853332312  | 1.757789259  |
| H    | -1.024244604            | -4.75408791  | 1.008699214  |
| C    | -1.594584082            | 3.14398791   | 0.784902615  |
| H    | 1.054657543             | -6.621619313 | -0.472924183 |
| C    | -3.559699677            | -1.364937582 | 2.356444846  |
| H    | -2.321716352            | 3.82147555   | 0.310650975  |
| C    | -2.420433587            | -1.124582463 | 1.582906065  |
| H    | -0.957444548            | -6.520251676 | 0.842636126  |

---

|   |              |              |              |
|---|--------------|--------------|--------------|
| H | 1.308151083  | -4.856888703 | -0.444683013 |
| C | -1.308795145 | -5.592618846 | 0.365546896  |
| C | 0.814608202  | -5.675431274 | -0.98229345  |
| H | -5.379481414 | -2.524178785 | 2.558663385  |
| C | -1.3518128   | 1.93697964   | -0.139627592 |
| H | -2.404946895 | -5.627532736 | 0.350237856  |
| C | -4.490893622 | -2.324178384 | 1.964014204  |
| H | 1.273169306  | -5.71232633  | -1.977143367 |
| H | 0.292841642  | 2.868215319  | -1.292924768 |
| H | -3.314514417 | 1.046478354  | 0.361731462  |
| C | -0.715323085 | -5.48575671  | -1.056799959 |
| C | -0.69814506  | 2.428307101  | -1.44656658  |
| C | -2.727304194 | 1.341326361  | -0.515847562 |
| H | -3.308077291 | 2.101007435  | -1.061047891 |
| H | -1.149810971 | -7.590166204 | -1.35280609  |
| C | -4.24701379  | -3.012558536 | 0.772107466  |
| H | -0.596661144 | 1.614621827  | -2.171378337 |
| C | -3.106612622 | -2.738695397 | 0.021223622  |
| C | -1.316174457 | -6.637931892 | -1.88175879  |
| H | -2.399242619 | -6.529483201 | -2.021422785 |
| H | -1.335599602 | 3.2022448    | -1.901252924 |
| H | -4.949606099 | -3.759661911 | 0.408773963  |
| H | -2.625898878 | 0.462535875  | -1.16422654  |
| H | 0.446280917  | -5.212504498 | -3.96463044  |
| C | -2.884099518 | -3.429457509 | -1.296982738 |
| H | -0.848869211 | -6.734708759 | -2.867690541 |
| H | -3.475218576 | -4.353487536 | -1.351483442 |
| H | 1.07557244   | -3.568414024 | -3.715729767 |
| C | 0.256370296  | -4.149714002 | -4.157965251 |
| H | -3.258422175 | -2.772054348 | -2.095921852 |
| C | -1.113475427 | -3.694437591 | -3.618572732 |
| H | -0.563066019 | -1.570257026 | -3.667230555 |
| H | 0.293407932  | -4.006960128 | -5.248687118 |
| C | -1.337636022 | -2.233337036 | -4.061123381 |
| H | -2.114039947 | -5.615030523 | -4.096294447 |
| H | -3.230294207 | -4.255496809 | -3.880350055 |
| C | -2.237692801 | -4.540871233 | -4.251673998 |
| H | -1.304227922 | -2.175214767 | -5.160083721 |
| H | -2.315457668 | -1.842671445 | -3.748279917 |
| H | -2.242429504 | -4.370195    | -5.33960547  |
| H | 1.219623315  | -2.241479633 | 1.826475999  |
| N | 0.475703583  | -2.754403933 | 1.350170192  |
| H | 0.846652482  | -3.686977188 | 1.160716961  |
| H | -0.28876905  | -2.872985724 | 2.020622347  |
| N | 0.99802532   | -0.022426159 | -2.947895534 |
| N | 2.015649555  | 0.210281206  | -3.336060334 |

---



**Supplementary Table 60 | Cartesian coordinate of the transition state for elimination of the ammonia ligand from XX. Units are presented in Å.**

SCF energy (in toluene) = -1983.06187392 hartree

ZPE = 0.673637 hartree

imaginary frequency: 50i

---

| Atom | Coordinates (Angstroms) |              |              |
|------|-------------------------|--------------|--------------|
|      | X                       | Y            | Z            |
| Mo   | -0.291584638            | -1.415184887 | -0.836062705 |
| P    | -0.43524808             | 0.590889669  | 0.65135552   |
| N    | -2.298051447            | -1.701446266 | 0.113342805  |
| P    | -1.00468225             | -3.599856001 | -1.844233151 |
| N    | 1.577434974             | -1.267625864 | -1.531131887 |
| N    | 2.678156405             | -1.242440973 | -1.84475295  |
| H    | 1.552945281             | 1.89214834   | 3.755499048  |
| H    | 0.115166176             | 0.866675483  | 3.774010536  |
| C    | 0.640845049             | 1.636079132  | 3.1945581    |
| H    | 1.34186102              | -0.975743834 | 2.370218158  |
| H    | 0.011579366             | 2.529494715  | 3.16968293   |
| H    | 2.733110413             | 0.090151748  | 2.660027724  |
| C    | 1.907997345             | -0.127585911 | 1.963467103  |
| H    | 2.842281805             | 2.327379912  | 1.629786704  |
| C    | 1.038694373             | 1.132858346  | 1.791557983  |
| H    | -0.930798535            | -0.830810294 | 2.542757549  |
| H    | 2.338351742             | -0.437748117 | 1.006021554  |
| H    | -2.064384308            | 0.518622179  | 2.611117052  |
| C    | 1.90071175              | 2.191898467  | 1.076239601  |
| H    | -0.608751982            | 3.711895984  | 1.492745974  |
| H    | 2.158600671             | 1.879967745  | 0.055915271  |
| C    | -1.591571651            | -0.199685129 | 1.928714943  |
| H    | -4.111364204            | -0.712121307 | 2.800116464  |
| H    | 1.411043239             | 3.170430813  | 1.025062153  |
| H    | -2.035022133            | 2.853923257  | 2.118712346  |
| H    | -0.703584822            | -4.074606791 | 1.072970443  |
| C    | -1.560624853            | 3.249492617  | 1.210810892  |
| H    | 0.739356453             | -6.446125737 | 0.034172304  |
| C    | -3.890358606            | -1.233176122 | 1.871287125  |
| H    | -2.209459621            | 4.053388543  | 0.831200043  |
| C    | -2.635167301            | -1.07144058  | 1.280549446  |
| H    | -1.161744121            | -5.774336614 | 1.275701426  |

|   |              |              |              |
|---|--------------|--------------|--------------|
| H | 1.247716509  | -4.795782435 | -0.376323837 |
| C | -1.302998424 | -4.885770744 | 0.641439365  |
| C | 0.635545247  | -5.639580876 | -0.708370504 |
| H | -5.823862945 | -2.192879188 | 1.716226608  |
| C | -1.404563201 | 2.178690225  | 0.112999259  |
| H | -2.361291642 | -4.607881121 | 0.697464278  |
| C | -4.840568834 | -2.05731453  | 1.270544305  |
| H | 1.034749005  | -6.014865034 | -1.654348748 |
| H | 0.311236299  | 3.159352407  | -0.877081577 |
| H | -3.42213405  | 1.384587335  | 0.527527332  |
| C | -0.8486145   | -5.225150286 | -0.796597869 |
| C | -0.696294596 | 2.800770398  | -1.1112268   |
| C | -2.825382565 | 1.749017779  | -0.317473995 |
| H | -3.345405129 | 2.627506813  | -0.728255087 |
| H | -1.613362853 | -7.242450086 | -0.584241849 |
| C | -4.498172282 | -2.703119205 | 0.082908967  |
| H | -0.625166455 | 2.091424372  | -1.940579189 |
| C | -3.231491349 | -2.513840694 | -0.474034334 |
| C | -1.685617209 | -6.41303707  | -1.30482295  |
| H | -2.750522743 | -6.165839573 | -1.406256514 |
| H | -1.280518385 | 3.665866952  | -1.460237087 |
| H | -5.207618237 | -3.354543572 | -0.42230003  |
| H | -2.815028766 | 0.980715675  | -1.094643057 |
| H | 0.331833018  | -5.943414908 | -3.595430958 |
| C | -2.852730789 | -3.20486191  | -1.757655617 |
| H | -1.329051712 | -6.792669387 | -2.2685983   |
| H | -3.510196249 | -4.066726827 | -1.929699548 |
| H | 1.332695869  | -4.474930354 | -3.478251811 |
| C | 0.446806741  | -4.914480931 | -3.954069782 |
| H | -3.00661762  | -2.508991647 | -2.595246438 |
| C | -0.815578525 | -4.059479601 | -3.72455484  |
| H | 0.251020622  | -2.18271143  | -4.136672686 |
| H | 0.647047887  | -4.969154904 | -5.034472851 |
| C | -0.623569105 | -2.736948206 | -4.493604072 |
| H | -2.270498974 | -5.730821937 | -3.821825458 |
| H | -2.939699597 | -4.158391057 | -4.297941439 |
| C | -2.039995051 | -4.78501627  | -4.321901142 |
| H | -0.476830601 | -2.966677384 | -5.560030343 |
| H | -1.489834965 | -2.072391652 | -4.416526201 |
| H | -1.837536187 | -5.013073587 | -5.37954741  |
| H | 2.788929247  | -2.808640875 | 0.185504987  |
| N | 2.373498798  | -3.203208005 | 1.0320066    |
| H | 2.733558292  | -4.15582624  | 1.111867675  |
| H | 2.774579519  | -2.680506741 | 1.811447834  |
| N | -1.079645977 | -0.455390455 | -2.32900385  |
| N | -1.579405287 | 0.113954283  | -3.190925296 |

---

**Supplementary Table 61 | Cartesian coordinate of the product complex for elimination of the ammonia ligand from XX. Units are presented in Å.**

SCF energy (in toluene) = -1983.06752402 hartree

ZPE = 0.671638 hartree

-----

| Atom | Coordinates (Angstroms) |              |              |
|------|-------------------------|--------------|--------------|
|      | X                       | Y            | Z            |
| Mo   | -0.568818136            | -1.327413488 | -0.890349162 |
| P    | -0.662912932            | 0.574765171  | 0.666283436  |
| N    | -2.592810543            | -1.666964014 | 0.035610161  |
| P    | -1.112554855            | -3.558400974 | -1.793993879 |
| N    | 1.244467134             | -1.029102405 | -1.669123381 |
| N    | 2.299588878             | -0.870383478 | -2.085393539 |
| H    | 1.39943353              | 1.224752065  | 3.919691119  |
| H    | -0.311426233            | 0.803190034  | 3.800147431  |
| C    | 0.509258134             | 1.311538558  | 3.277717671  |
| H    | 0.465899447             | -1.387910326 | 2.623078566  |
| H    | 0.26005059              | 2.374285876  | 3.210423569  |
| H    | 2.124671752             | -0.813281823 | 2.796846753  |
| C    | 1.246580578             | -0.788376925 | 2.133757564  |
| H    | 2.882180698             | 1.337914832  | 1.861287052  |
| C    | 0.813113789             | 0.677656271  | 1.905447376  |
| H    | -1.533899776            | -0.635157043 | 2.578528662  |
| H    | 1.539280525             | -1.290389924 | 1.202072386  |
| H    | -2.562688594            | 0.768293741  | 2.340128839  |
| C    | 1.982504024             | 1.424799149  | 1.233244457  |
| H    | -0.191807303            | 3.646072237  | 1.559524435  |
| H    | 2.220637225             | 1.006169806  | 0.247372717  |
| C    | -2.040580981            | -0.03719626  | 1.80727077   |
| H    | -4.639226341            | -0.434974242 | 2.440218703  |
| H    | 1.77326751              | 2.49432572   | 1.112431134  |
| H    | -1.777130717            | 3.092253598  | 2.146672539  |
| H    | -0.938733727            | -3.751939654 | 1.153489111  |
| C    | -1.214553277            | 3.397252324  | 1.254207198  |
| H    | 1.04301682              | -5.895993376 | 0.325393349  |
| C    | -4.333908727            | -1.04797989  | 1.595234732  |
| H    | -1.675526633            | 4.324536186  | 0.880646514  |
| C    | -3.031170848            | -0.934174066 | 1.106085999  |
| H    | -1.030137513            | -5.491444149 | 1.478386263  |
| H    | 1.267179971             | -4.19582646  | -0.125173632 |
| C    | -1.315914157            | -4.705915532 | 0.762904557  |

-----

|   |              |              |              |
|---|--------------|--------------|--------------|
| C | 0.816478782  | -5.144228882 | -0.446484179 |
| H | -6.235607472 | -2.060079439 | 1.386215063  |
| C | -1.252220036 | 2.332754537  | 0.143774841  |
| H | -2.411232026 | -4.655014093 | 0.747946427  |
| C | -5.218475527 | -1.955078183 | 1.014229404  |
| H | 1.321848777  | -5.45972745  | -1.365239047 |
| H | 0.668566446  | 2.932240791  | -0.763066914 |
| H | -3.401194326 | 1.925896804  | 0.463958569  |
| C | -0.715400448 | -5.044169739 | -0.620420494 |
| C | -0.380686498 | 2.788682317  | -1.045823458 |
| C | -2.711209325 | 2.191806867  | -0.347050082 |
| H | -3.041756983 | 3.160637145  | -0.750539237 |
| H | -1.094620135 | -7.149956942 | -0.268435464 |
| C | -4.763169218 | -2.728711436 | -0.051426359 |
| H | -0.415551857 | 2.063601227  | -1.865379606 |
| C | -3.459168923 | -2.56558666  | -0.526965218 |
| C | -1.277866456 | -6.407859021 | -1.06080568  |
| H | -2.362123918 | -6.377435349 | -1.232315132 |
| H | -0.7564966   | 3.751111037  | -1.425008397 |
| H | -5.415679055 | -3.454156167 | -0.532046126 |
| H | -2.81195332  | 1.45158358   | -1.146423106 |
| H | 0.620831354  | -5.716446963 | -3.375085513 |
| C | -2.98989908  | -3.380675183 | -1.709296486 |
| H | -0.797110509 | -6.78441803  | -1.970365187 |
| H | -3.542400251 | -4.329556438 | -1.750612694 |
| H | 1.315609333  | -4.077028117 | -3.401985873 |
| C | 0.531814405  | -4.719958349 | -3.822620397 |
| H | -3.238076322 | -2.830987095 | -2.629464812 |
| C | -0.870502866 | -4.108518567 | -3.63306771  |
| H | -0.1509413   | -2.111429618 | -4.20325298  |
| H | 0.73368299   | -4.827624575 | -4.898699852 |
| C | -0.936933625 | -2.821036631 | -4.482587454 |
| H | -1.9665751   | -6.031688433 | -3.600147041 |
| H | -2.946448751 | -4.650768579 | -4.129555224 |
| C | -1.941012249 | -5.088892188 | -4.154535018 |
| H | -0.80260637  | -3.086650183 | -5.542338928 |
| H | -1.897529664 | -2.300876224 | -4.393945515 |
| H | -1.723515166 | -5.331019829 | -5.206045425 |
| H | 3.44126741   | -2.20339538  | -0.603128558 |
| N | 3.588476838  | -2.825552915 | 0.195165083  |
| H | 4.025351138  | -3.6690848   | -0.18046725  |
| H | 4.298388296  | -2.377723041 | 0.77751622   |
| N | -1.446542726 | -0.409362175 | -2.367332611 |
| N | -1.989989222 | 0.132280873  | -3.218305805 |

---

**Supplementary Table 62 | Cartesian coordinate of the reactant complex for coordination of dinitrogen to XIX'. Units are presented in Å.**

SCF energy (in toluene) = -2036.01364113 hartree

ZPE = 0.640838 hartree

```

-----
Atom          Coordinates (Angstroms)
          X           Y           Z
-----
Mo      2.897435293   -0.190280519   -0.259172779
P       3.431585504   -2.227810116    0.998045567
N       5.140787208   -0.093022779   -0.283616928
P       3.248497387    2.063312315   -1.190648159
N      -0.249202745   -0.350957241   -0.163627671
N       0.889900355   -0.291853159   -0.210922777
N      -1.515602513    2.214990789    2.001332891
N      -0.656535393    1.713906732    2.488729382
N       2.976080795   -1.015407686   -2.021787137
N       3.058913729   -1.505991966   -3.053850624
H       2.85513776     -3.01693181    4.780095008
H       4.388334763   -2.628215063    3.993505539
C       3.400971466    -3.07685873     3.825828187
H       3.364163169   -0.334252847    3.283848795
H       3.546036723   -4.137006538    3.599605725
H       1.914437136    -0.83784463     4.160141699
C       2.409730178   -0.869124634     3.177867134
H       0.652707528    -2.87516907     3.536439442
C       2.600037762   -2.338941608     2.735397494
H       5.130754744   -1.227094287     2.411042251
H       1.771893214   -0.315232673     2.475044015
H       5.827434501   -2.689167222     1.728558559
C       1.203861679   -2.977410265     2.589429964
H       3.099598295   -5.326362106     1.857598143
H       0.61308076    -2.488780646     1.804536404
C       5.214426072   -1.811875322     1.483170133
H       7.865188359   -1.700421545     0.935199688
H       1.262797061   -4.048262445     2.361169165
H       4.82755132    -4.921589385     1.738806056
H       4.48630062     1.991313649     1.486464683
C       3.91658001    -5.117016555     1.157565494
H       2.517945766    4.331483512     1.796318188
C       7.299333427   -0.993030208     0.333156651
H       4.09087517    -6.036852701     0.57864131

```

|   |             |              |              |
|---|-------------|--------------|--------------|
| C | 5.90980464  | -0.949929333 | 0.458614349  |
| H | 4.842008707 | 3.689450039  | 1.859644054  |
| H | 2.004536031 | 2.671394498  | 1.428344477  |
| C | 4.71293482  | 2.967699408  | 1.039198031  |
| C | 2.312216769 | 3.624608157  | 0.978093054  |
| H | 9.028790146 | -0.139567339 | -0.649821703 |
| C | 3.580006315 | -3.968093894 | 0.190368201  |
| H | 5.674811437 | 2.882283846  | 0.520077208  |
| C | 7.946237081 | -0.121662562 | -0.542086586 |
| H | 1.459675258 | 4.01328221   | 0.412446476  |
| H | 1.408957129 | -4.367541283 | 0.154439226  |
| H | 5.692606941 | -3.734094961 | -0.412421235 |
| C | 3.579269611 | 3.457194282  | 0.110623997  |
| C | 2.252885673 | -4.271269183 | -0.538242892 |
| C | 4.703393338 | -3.871866268 | -0.86687388  |
| H | 4.734588359 | -4.813161546 | -1.435776605 |
| H | 4.263399804 | 5.502029014  | 0.358321049  |
| C | 7.169652678 | 0.778595435  | -1.26904554  |
| H | 2.008689666 | -3.490002368 | -1.265814143 |
| C | 5.77915771  | 0.77345097   | -1.131487716 |
| C | 3.997951372 | 4.82234862   | -0.466203205 |
| H | 4.878024673 | 4.743807296  | -1.11810974  |
| H | 2.346548335 | -5.224196377 | -1.08077292  |
| H | 7.631232802 | 1.482661057  | -1.957808801 |
| H | 4.53242598  | -3.060343626 | -1.580934675 |
| H | 1.27083624  | 4.4941808    | -1.698490029 |
| C | 4.944456337 | 1.7319574    | -1.949121849 |
| H | 3.193967599 | 5.303290573  | -1.033752845 |
| H | 5.526668146 | 2.635706931  | -2.176816392 |
| H | 0.430363611 | 2.931223691  | -1.543413469 |
| C | 1.036031201 | 3.555192107  | -2.213030585 |
| H | 4.710516493 | 1.257132215  | -2.913272024 |
| C | 2.294929648 | 2.809917783  | -2.699691182 |
| H | 1.174356924 | 0.940366671  | -2.973726235 |
| H | 0.410761584 | 3.808869234  | -3.081921848 |
| C | 1.823823068 | 1.609225869  | -3.548208307 |
| H | 3.508944057 | 4.625226606  | -3.075289741 |
| H | 3.997301929 | 3.216127284  | -4.036451212 |
| C | 3.1378708   | 3.738225328  | -3.597809848 |
| H | 1.255751273 | 1.985692283  | -4.412481267 |
| H | 2.654255055 | 1.009342711  | -3.937585519 |
| H | 2.514523665 | 4.087602802  | -4.434920386 |

---

**Supplementary Table 63 | Cartesian coordinate of the transition state for coordination of dinitrogen to XIX'. Units are presented in Å.**

SCF energy (in toluene) = -2036.00646998 hartree

ZPE = 0.643386 hartree

imaginary frequency: 67i

---

| Atom | Coordinates (Angstroms) |              |              |
|------|-------------------------|--------------|--------------|
|      | X                       | Y            | Z            |
| Mo   | 2.7152904               | -0.080353185 | -0.077384972 |
| P    | 3.266365356             | -2.211728179 | 1.100749262  |
| N    | 4.955788968             | -0.031272329 | -0.085684379 |
| P    | 3.159868234             | 2.148604965  | -1.163361172 |
| N    | -0.439130874            | -0.134069408 | 0.009503869  |
| N    | 0.700359877             | -0.116769364 | -0.027136369 |
| N    | 0.275814525             | 1.878339381  | 2.903685239  |
| N    | 1.284899412             | 1.621139104  | 2.522092138  |
| N    | 2.732920037             | -0.924478411 | -1.825057814 |
| N    | 2.783892233             | -1.42514229  | -2.855858999 |
| H    | 2.692538878             | -3.61215703  | 4.705177984  |
| H    | 4.123873551             | -2.762785362 | 4.118245717  |
| C    | 3.28990522              | -3.403211742 | 3.804471638  |
| H    | 2.670155355             | -0.668069524 | 3.550265263  |
| H    | 3.704358814             | -4.354909055 | 3.461716446  |
| H    | 1.395285002             | -1.60744145  | 4.341462623  |
| C    | 1.869328325             | -1.398959068 | 3.370160488  |
| H    | 0.557877372             | -3.698703758 | 3.37247459   |
| C    | 2.390281208             | -2.713027238 | 2.757708275  |
| H    | 4.716931189             | -1.04893924  | 2.644827085  |
| H    | 1.122267717             | -0.935837494 | 2.719951072  |
| H    | 5.59067694              | -2.482601841 | 2.106671903  |
| C    | 1.16164674              | -3.595822206 | 2.458237483  |
| H    | 3.359750855             | -5.401374325 | 1.625163541  |
| H    | 0.520775444             | -3.149151238 | 1.687315754  |
| C    | 4.954379023             | -1.658169623 | 1.758983433  |
| H    | 7.639460683             | -1.450705028 | 1.420459709  |
| H    | 1.436140174             | -4.606357735 | 2.136100194  |
| H    | 5.018423594             | -4.761701142 | 1.59280402   |
| H    | 4.224742988             | 2.326398307  | 1.575912554  |
| C    | 4.148001381             | -5.012025035 | 0.972031227  |
| H    | 2.816124419             | 4.980096119  | 1.415313429  |

|   |             |              |              |
|---|-------------|--------------|--------------|
| C | 7.093914517 | -0.816227961 | 0.725620185  |
| H | 4.45135583  | -5.834307211 | 0.306335864  |
| C | 5.69790486  | -0.808182256 | 0.762043197  |
| H | 4.903994917 | 3.961284524  | 1.693324573  |
| H | 1.895105562 | 3.487636599  | 1.16872733   |
| C | 4.664536864 | 3.146317672  | 0.993883305  |
| C | 2.468603799 | 4.264175786  | 0.655135088  |
| H | 8.856889924 | -0.010838036 | -0.237119695 |
| C | 3.679487316 | -3.822990866 | 0.111916546  |
| H | 5.608873709 | 2.789912415  | 0.568193304  |
| C | 7.769733649 | -0.015841661 | -0.1939916   |
| H | 1.787123086 | 4.801407801  | -0.00936721  |
| H | 1.589923295 | -4.520304352 | -0.055546974 |
| H | 5.760812471 | -3.266995608 | -0.373308589 |
| C | 3.690203413 | 3.676359339  | -0.082678535 |
| C | 2.42950777  | -4.233484531 | -0.69727344  |
| C | 4.815926472 | -3.493397858 | -0.882507737 |
| H | 4.991250499 | -4.375779082 | -1.51628383  |
| H | 4.756455544 | 5.563355121  | -0.145166217 |
| C | 7.015886757 | 0.77641733   | -1.059016948 |
| H | 2.095689451 | -3.430013001 | -1.360088574 |
| C | 5.6209401   | 0.753058459  | -0.989970292 |
| C | 4.394752522 | 4.805715547  | -0.857548517 |
| H | 5.266820723 | 4.452173299  | -1.422588568 |
| H | 2.677470552 | -5.103483192 | -1.323996725 |
| H | 7.499999037 | 1.413500564  | -1.795635469 |
| H | 4.567048218 | -2.659882951 | -1.544000935 |
| H | 1.488722381 | 4.762092889  | -2.023746125 |
| C | 4.798542501 | 1.596082941  | -1.929176209 |
| H | 3.719237708 | 5.315239152  | -1.553124586 |
| H | 5.408478795 | 2.415137385  | -2.330674389 |
| H | 0.473447923 | 3.38718193   | -1.52136649  |
| C | 1.100193638 | 3.784574151  | -2.329958846 |
| H | 4.489601223 | 0.97770878   | -2.784280965 |
| C | 2.217362616 | 2.801651629  | -2.733213674 |
| H | 0.85661501  | 1.072993738  | -2.704658797 |
| H | 0.446809954 | 3.95435244   | -3.198325268 |
| C | 1.54247102  | 1.580339779  | -3.39162641  |
| H | 3.656785378 | 4.348471655  | -3.408400925 |
| H | 3.86845912  | 2.770684643  | -4.192656206 |
| C | 3.126358091 | 3.469042369  | -3.787310693 |
| H | 0.965371596 | 1.925322299  | -4.263169639 |
| H | 2.263755445 | 0.838591062  | -3.748804538 |
| H | 2.504783708 | 3.800731311  | -4.632897774 |

---



**Supplementary Table 64 | Cartesian coordinate of the transition state for protonation of the bridging dinitrogen ligand in 1 by LutH<sup>+</sup> [TS(BR)]. Units are presented in Å.**

SCF energy (in toluene) = -4289.74738262 hartree

ZPE = 1.440997 hartree

imaginary frequency: 1040i

---

| Atom | Coordinates (Angstroms) |              |              |
|------|-------------------------|--------------|--------------|
|      | X                       | Y            | Z            |
| Mo   | 2.700799535             | 0.204071548  | -0.131785265 |
| Mo   | -2.634300315            | -0.145041435 | -0.258835441 |
| P    | -4.007879695            | 1.879560104  | 0.909538014  |
| P    | 3.910625461             | -2.080975256 | 0.532455069  |
| N    | 4.991898665             | 0.609248018  | -0.41999196  |
| N    | -4.747129207            | -0.232206945 | -1.180515939 |
| P    | -2.57699827             | -2.175214857 | -1.851704631 |
| P    | 2.817364429             | 2.665490096  | -0.987967022 |
| N    | 0.767612254             | -0.073181483 | 0.125552058  |
| N    | -0.417979133            | -0.240025297 | 0.352393235  |
| N    | 3.341408566             | 1.125646766  | 2.830853111  |
| N    | 3.028312252             | 0.817206701  | 1.785645085  |
| N    | 2.715520768             | -0.425754993 | -2.077879067 |
| N    | 2.858482857             | -0.740519672 | -3.155019205 |
| N    | -3.735020531            | -1.89102989  | 2.124558243  |
| N    | -3.283392961            | -1.273202897 | 1.277811262  |
| N    | -2.139091857            | 1.033395095  | -1.824265042 |
| N    | -1.964661395            | 1.691402797  | -2.735714356 |
| H    | -5.451004726            | 2.89564964   | 4.404313744  |
| H    | 4.25432866              | -4.275337018 | 3.73088798   |
| H    | 5.352050957             | -3.002781831 | 3.203342629  |
| H    | -6.215714973            | 1.822891921  | 3.235545306  |
| C    | -5.523474402            | 2.667038317  | 3.330460317  |
| C    | 4.640936116             | -3.755143546 | 2.842217404  |
| H    | 3.453400237             | -1.391603979 | 3.463673323  |
| H    | -4.351174274            | 0.242170942  | 3.478989356  |
| H    | 5.189919795             | -4.491116956 | 2.251864381  |
| H    | -5.971417768            | 3.536593025  | 2.845106074  |
| H    | 2.405832846             | -2.724015714 | 3.954661859  |
| H    | -3.586835815            | 1.314885135  | 4.657637533  |
| C    | -3.647287903            | 1.074640382  | 3.585767511  |
| C    | 2.763363219             | -2.153858037 | 3.085118378  |

---

|   |              |              |              |
|---|--------------|--------------|--------------|
| H | -3.078801682 | 3.586252614  | 4.245143878  |
| H | 2.054307159  | -4.693887438 | 2.620039685  |
| C | -4.107407011 | 2.326048996  | 2.812584253  |
| C | 3.4455876    | -3.118843893 | 2.098338069  |
| H | 5.211948317  | -0.82418671  | 2.130958362  |
| H | -5.596029918 | 0.197782945  | 1.568190346  |
| H | -2.669405718 | 0.716904633  | 3.260415489  |
| H | 1.90834149   | -1.64365435  | 2.635402499  |
| H | -6.497570658 | 1.603395223  | 0.999208242  |
| H | 6.288797325  | -1.945974958 | 1.30479301   |
| C | -3.168900473 | 3.502633853  | 3.151934403  |
| C | 2.437138166  | -4.216395628 | 1.706546895  |
| H | -5.038662419 | 4.919327232  | 1.47442613   |
| H | 4.832431123  | -5.182352091 | 0.288859709  |
| H | -2.160362751 | 3.371125788  | 2.748621469  |
| H | 1.578401272  | -3.809261088 | 1.158334367  |
| C | -5.638615197 | 0.959981838  | 0.778009636  |
| C | 5.469828539  | -1.23491473  | 1.144678142  |
| H | -7.948130083 | 0.686420463  | -0.548655244 |
| H | 8.007477138  | -0.478267545 | 0.670079005  |
| H | -3.552653293 | 4.461190578  | 2.788123968  |
| H | 2.88844571   | -5.006574561 | 1.098329016  |
| H | -6.342960839 | 3.996331167  | 0.694535739  |
| H | 6.267829997  | -4.131453954 | 0.311478575  |
| H | 4.612587412  | 2.806895759  | 1.399937845  |
| H | -4.89883992  | -2.794965392 | -0.066218674 |
| C | -5.369895194 | 4.476204518  | 0.530606571  |
| C | 5.417465868  | -4.465571455 | -0.295665049 |
| H | 2.398038708  | 5.063210099  | 1.971727994  |
| H | -3.114139043 | -5.407033958 | 0.144608836  |
| C | -7.119072296 | 0.257303523  | -1.106074198 |
| C | 7.299955184  | 0.128425727  | 0.110340058  |
| H | -5.536567164 | 5.30597121   | -0.172111603 |
| H | 5.831991546  | -5.014189205 | -1.153890356 |
| C | -5.836751881 | 0.296671478  | -0.550418893 |
| C | 5.931661667  | -0.122657948 | 0.244086723  |
| H | 4.763587845  | 4.537105295  | 1.718196019  |
| H | -5.268637187 | -4.489002288 | -0.412875779 |
| H | 2.1013474    | 3.32176126   | 1.915115481  |
| H | -2.64368595  | -3.799817854 | 0.712600072  |
| C | 4.598478539  | 3.791293211  | 0.927274077  |
| C | -4.857916837 | -3.563267066 | -0.842290463 |
| C | 2.158910794  | 4.224156914  | 1.302064162  |
| C | -2.634793022 | -4.462803045 | -0.154541082 |
| H | 8.801215612  | 1.343924789  | -0.862087524 |
| H | -8.306822488 | -0.336358031 | -2.814710346 |
| C | -4.336422223 | 3.513601892  | -0.090004459 |

|   |              |              |              |
|---|--------------|--------------|--------------|
| C | 4.576422453  | -3.289783592 | -0.833158023 |
| H | 5.449346743  | 3.857841864  | 0.239757594  |
| H | -5.521348635 | -3.266246548 | -1.662059833 |
| C | 7.74003508   | 1.139363709  | -0.738979729 |
| C | -7.318676016 | -0.308658222 | -2.360921542 |
| H | 1.16848997   | 4.414472718  | 0.87598142   |
| H | -1.593885492 | -4.690788488 | -0.407242868 |
| H | -2.551281833 | 4.541695074  | 0.70931444   |
| H | 2.701528357  | -4.443402638 | -0.997041121 |
| H | -5.89291987  | 2.774624005  | -1.46247642  |
| H | 6.439376705  | -2.225684138 | -1.341845296 |
| C | 3.259428169  | 4.113458813  | 0.226043082  |
| C | -3.419744864 | -3.849820306 | -1.331734716 |
| C | -2.989213997 | 4.247177915  | -0.250937091 |
| C | 3.376307044  | -3.849693982 | -1.622102007 |
| C | -4.866068844 | 3.155058606  | -1.497535412 |
| C | 5.485771983  | -2.503610601 | -1.805136738 |
| H | -4.88015096  | 4.072092686  | -2.104879959 |
| H | 5.718895008  | -3.153891918 | -2.660236016 |
| H | 3.796069005  | 6.201417323  | 0.298316537  |
| H | -4.125568367 | -5.74284461  | -2.096059535 |
| C | -6.211789046 | -0.840777752 | -3.01396944  |
| C | 6.783663309  | 1.880780562  | -1.42648682  |
| H | -2.263386717 | 3.629980485  | -0.787592192 |
| H | 2.792751526  | -3.054964894 | -2.091441184 |
| C | -4.955190214 | -0.806894416 | -2.403043222 |
| C | 5.425613356  | 1.606186444  | -1.244098315 |
| C | 3.431929882  | 5.486723329  | -0.454150466 |
| C | -3.527082454 | -4.89501639  | -2.460755485 |
| H | 4.173029592  | 5.466210069  | -1.262493695 |
| H | -4.034302558 | -4.504698821 | -3.351948273 |
| H | -3.143753473 | 5.165610823  | -0.836796653 |
| H | 3.747178705  | -4.507587954 | -2.421635886 |
| H | 7.07647402   | 2.679895256  | -2.102906959 |
| H | -6.308570886 | -1.301958135 | -3.993818881 |
| H | -4.245425387 | 2.425725017  | -2.020690209 |
| H | 5.019350219  | -1.599681514 | -2.201657906 |
| H | 0.609224396  | 4.892285196  | -1.195964902 |
| H | -0.580663593 | -4.582833449 | -2.287901657 |
| C | 4.398630285  | 2.429635497  | -1.969821269 |
| C | -3.789971394 | -1.457497764 | -3.086745154 |
| H | 2.494355902  | 5.888272613  | -0.850626392 |
| H | -2.555338683 | -5.297325446 | -2.764510885 |
| H | 4.838258958  | 3.383385466  | -2.284508469 |
| H | -4.149849728 | -2.192846289 | -3.816131377 |
| H | -0.059321381 | 3.256245991  | -0.987630297 |
| H | 0.176490016  | -3.231964746 | -1.411162495 |

|   |              |              |              |
|---|--------------|--------------|--------------|
| C | 0.395146995  | 3.947072782  | -1.707227351 |
| C | -0.150306094 | -3.581998006 | -2.398873948 |
| H | 4.091180227  | 1.906558727  | -2.88616744  |
| H | -3.217003352 | -0.705460239 | -3.646665685 |
| C | 1.64425449   | 3.335237856  | -2.367416026 |
| C | -1.119899825 | -2.587648114 | -3.061181907 |
| H | 0.734873851  | 1.349662406  | -2.619057773 |
| H | -0.024022901 | -0.833211076 | -2.346894948 |
| H | -0.356788263 | 4.153189017  | -2.480273832 |
| H | 0.744256851  | -3.682797964 | -3.028940953 |
| C | 1.205411805  | 2.130004911  | -3.220231738 |
| C | -0.370712386 | -1.264775974 | -3.289928499 |
| H | 2.585213324  | 5.292530968  | -2.853682057 |
| H | -2.073907414 | -4.075988334 | -4.408037518 |
| H | 3.154422602  | 3.944583059  | -3.858053498 |
| H | -2.159277885 | -2.405982738 | -4.998137756 |
| C | 2.285458136  | 4.358327949  | -3.331962967 |
| C | -1.54062318  | -3.124066856 | -4.447428    |
| H | 0.466307918  | 2.472089638  | -3.956535376 |
| H | 0.504488484  | -1.453044463 | -3.926656936 |
| H | 2.03947453   | 1.687942187  | -3.777374805 |
| H | -0.9865124   | -0.516607919 | -3.801198392 |
| H | 1.541866113  | 4.61168536   | -4.101360248 |
| H | -0.631695138 | -3.283005778 | -5.046691304 |
| H | -0.544134685 | -0.597836299 | 1.51092636   |
| C | -0.132347848 | 0.343849791  | 5.052443942  |
| C | -0.343698984 | -0.857577695 | 5.730042301  |
| C | -0.615556429 | -2.007898307 | 4.996787835  |
| C | -0.660138672 | -1.940473871 | 3.598580488  |
| N | -0.462588853 | -0.7673833   | 2.959088488  |
| C | -0.209059425 | 0.367799343  | 3.659356076  |
| H | 0.081310414  | 1.262846489  | 5.592011856  |
| H | -0.296578671 | -0.893384036 | 6.816711888  |
| H | -0.786252218 | -2.962104005 | 5.489804819  |
| C | -0.907631775 | -3.174751904 | 2.779240179  |
| H | -0.225060942 | -3.97964271  | 3.077101751  |
| H | -1.932636018 | -3.532341488 | 2.932084138  |
| H | -0.775297858 | -2.973978764 | 1.712880309  |
| C | -0.044703451 | 1.636138365  | 2.875448844  |
| H | 0.802119272  | 1.572667083  | 2.189879242  |
| H | -0.926527319 | 1.810748771  | 2.24884147   |
| H | 0.102161698  | 2.491455805  | 3.542269813  |

---

**Supplementary Table 65 | Cartesian coordinate of the product complex for protonation of the bridging dinitrogen ligand in 1 by LutH<sup>+</sup> [II-Lut(BR)]. Units are presented in Å.**

SCF energy (in toluene) = -4289.79412988 hartree

ZPE = 1.442022 hartree

```

-----
Atom          Coordinates (Angstroms)
          X           Y           Z
-----
Mo      2.590250588   -0.450952706   0.084540188
Mo     -2.475131633   -0.792813423   0.390298689
P      -3.127700808   -0.91979797   -2.100287945
P       3.078677683    1.960376976    0.948044322
N       4.895584048   -0.228076257  -0.114872935
N      -4.628436304   -1.506728999    0.476563923
P      -2.901047841   -0.994441756    2.907935941
P       3.368249838   -2.78643514   -0.902000557
N       0.721567174   -0.355281395    0.296392812
N      -0.496723315   -0.042314692    0.403662612
N       2.283367976    0.660670779   -2.874733902
N       2.389187194    0.268983397   -1.820365417
N       2.831324809   -1.196375522    1.973911328
N       2.984273546   -1.613852753    3.013000529
N      -3.264853619    2.26122789    0.457658704
N      -3.030263025    1.145515423    0.422175099
N      -1.791763151   -2.689766688    0.351450792
N      -1.404647113   -3.760146188    0.320973226
H      -3.497228903    1.551543664   -5.089803732
H       1.94152665    5.506706854   -0.102534342
H       3.449397336    4.695192276   -0.535094463
H      -4.743131467    1.098334379   -3.926254847
C      -3.827428381    0.746344518   -4.416900033
C       2.675584481    4.763769578    0.239832946
H       1.99688853    2.990413054   -1.726547167
H      -3.317201078    2.136534337   -2.103434532
H       3.136569562    5.144761405    1.153824687
H      -4.082351768   -0.113881064   -5.040326173
H       0.586880077    3.904285312   -1.179511457
H      -2.133084002    2.546127744   -3.348678231
C      -2.431827373    1.767744294   -2.631241326
C       1.265753749    3.081357756   -0.915154229
H      -1.081672156    0.957158997   -4.751589891
H       0.071066998    4.310461251    1.084896492

```

|   |              |              |              |
|---|--------------|--------------|--------------|
| C | -2.699725375 | 0.460583451  | -3.401230039 |
| C | 1.92934862   | 3.42431756   | 0.433821182  |
| H | 4.202342336  | 2.435185271  | -1.124077439 |
| H | -4.996912755 | 0.512115571  | -1.597858605 |
| H | -1.624028852 | 1.651752467  | -1.901380758 |
| H | 0.688996728  | 2.152208986  | -0.877545566 |
| H | -5.592836558 | -0.774369045 | -2.648357372 |
| H | 5.176421655  | 3.097956228  | 0.187611111  |
| C | -1.402879696 | 0.093902417  | -4.150879144 |
| C | 0.812881711  | 3.607367272  | 1.483807257  |
| H | -3.208688028 | -2.038835413 | -5.148528942 |
| H | 3.256233001  | 4.354478704  | 3.097218311  |
| H | -0.585650054 | -0.145427802 | -3.458585089 |
| H | 0.290170397  | 2.668186587  | 1.711003114  |
| C | -4.952123273 | -0.571739967 | -1.781250404 |
| C | 4.593225155  | 2.221334951  | -0.118298082 |
| H | -7.450053909 | -1.539959174 | -1.394570747 |
| H | 7.283158822  | 2.158000541  | -0.368055119 |
| H | -1.532378137 | -0.747516569 | -4.839262092 |
| H | 1.183234368  | 4.022637018  | 2.427079239  |
| H | -4.815354698 | -2.201242196 | -4.404683234 |
| H | 4.848904686  | 4.07072961   | 2.357889316  |
| H | 4.401054294  | -0.826621446 | -2.888822159 |
| H | -5.0027343   | 0.896412556  | 2.007642616  |
| C | -3.795369969 | -2.605548547 | -4.418594678 |
| C | 4.112953766  | 3.674134422  | 3.068664745  |
| H | 2.670592087  | -2.765786285 | -4.658866276 |
| H | -3.623272826 | 2.483522217  | 4.361472799  |
| C | -6.80740685  | -1.733472252 | -0.538997361 |
| C | 6.862339671  | 1.157002509  | -0.314003988 |
| H | -3.864636096 | -3.637913    | -4.792466881 |
| H | 4.57903153   | 3.699054198  | 4.064144125  |
| C | -5.479860827 | -1.2983335   | -0.569982345 |
| C | 5.481222986  | 1.003319464  | -0.179986106 |
| H | 4.828402009  | -1.819938832 | -4.285369033 |
| H | -5.668497927 | 1.559254964  | 3.507092038  |
| H | 1.938423979  | -1.822158485 | -3.353671277 |
| H | -2.789816825 | 2.044434535  | 2.866668289  |
| C | 4.73401222   | -1.822221991 | -3.190357458 |
| C | -5.180097979 | 0.679149803  | 3.063878852  |
| C | 2.436797915  | -2.767706317 | -3.584563949 |
| C | -3.036320342 | 1.692042792  | 3.872188358  |
| H | 8.760677923  | 0.133255018  | -0.477426369 |
| H | -8.319769169 | -2.758511437 | 0.618870171  |
| C | -3.152315784 | -2.629514583 | -3.018302545 |
| C | 3.707966624  | 2.219445903  | 2.755251975  |
| H | 5.736385768  | -1.990261966 | -2.780193329 |

|   |              |              |              |
|---|--------------|--------------|--------------|
| H | -5.890200759 | -0.153089103 | 3.131069747  |
| C | 7.68252664   | 0.032667138  | -0.376591122 |
| C | -7.290499901 | -2.408879713 | 0.579268726  |
| H | 1.72526321   | -3.578784548 | -3.405912978 |
| H | -2.106638105 | 1.580614936  | 4.438386776  |
| H | -1.073875828 | -2.521174838 | -3.761718785 |
| H | 1.725484938  | 2.4128283    | 3.708142941  |
| H | -5.036086148 | -3.393085956 | -2.164541645 |
| H | 5.821338235  | 1.702504149  | 2.392845648  |
| C | 3.749810481  | -2.945048277 | -2.789491602 |
| C | -3.876639526 | 0.395117655  | 3.844767873  |
| C | -1.706094064 | -3.158069496 | -3.135456062 |
| C | 2.613928334  | 1.776459382  | 3.752300569  |
| C | -3.965323205 | -3.626783391 | -2.161634447 |
| C | 4.960423845  | 1.337553363  | 2.964913758  |
| H | -3.85075386  | -4.631818379 | -2.593255569 |
| H | 5.236952568  | 1.37596703   | 4.027871306  |
| H | 4.678726445  | -4.233353262 | -4.251071679 |
| H | -4.936266112 | 0.821005074  | 5.680273762  |
| C | -6.421434655 | -2.622986846 | 1.646870276  |
| C | 7.085305138  | -1.223912235 | -0.305504224 |
| H | -1.232063821 | -3.255950139 | -2.155251928 |
| H | 2.300712215  | 0.740797719  | 3.597426395  |
| C | -5.104752788 | -2.161257238 | 1.576566653  |
| C | 5.698445474  | -1.329881767 | -0.17923349  |
| C | 4.408920237  | -4.282172897 | -3.186248931 |
| C | -4.280440004 | 0.030180312  | 5.287418791  |
| H | 5.334851042  | -4.47610608  | -2.629756068 |
| H | -4.842691183 | -0.910832352 | 5.341449366  |
| H | -1.727414662 | -4.157137311 | -3.596129111 |
| H | 3.016854991  | 1.849878316  | 4.772539627  |
| H | 7.685520043  | -2.129481132 | -0.345792245 |
| H | -6.754844083 | -3.144011099 | 2.541203185  |
| H | -3.625709646 | -3.672413194 | -1.124110414 |
| H | 4.796193194  | 0.288336207  | 2.706987951  |
| H | 1.869297698  | -5.296241646 | -2.116649137 |
| H | -1.297801027 | -0.06369919  | 5.497603129  |
| C | 5.057871246  | -2.692904491 | -0.09351153  |
| C | -4.166341823 | -2.377950602 | 2.738219656  |
| H | 3.74278914   | -5.140692468 | -3.062314155 |
| H | -3.422875737 | -0.040851935 | 5.964176395  |
| H | 5.745373292  | -3.451083738 | -0.486428425 |
| H | -4.741647585 | -2.560815606 | 3.654202077  |
| H | 0.756210224  | -4.193951238 | -1.264953407 |
| H | -0.318188854 | -0.018699195 | 4.013109164  |
| C | 1.528505873  | -4.959228472 | -1.13274876  |
| C | -0.752065496 | -0.679619179 | 4.775358429  |

|   |              |              |              |
|---|--------------|--------------|--------------|
| H | 4.882909741  | -2.943128823 | 0.963228139  |
| H | -3.565069982 | -3.280103305 | 2.554303511  |
| C | 2.681611998  | -4.467059779 | -0.236538346 |
| C | -1.626617169 | -1.781921371 | 4.144738485  |
| H | 1.312602985  | -3.476217637 | 1.168475139  |
| H | -0.184564163 | -2.142217183 | 2.529416226  |
| H | 1.046206538  | -5.816262964 | -0.643243463 |
| H | 0.081794256  | -1.151753484 | 5.314862946  |
| C | 2.113368233  | -4.221181565 | 1.174022886  |
| C | -0.695155392 | -2.694200211 | 3.32440002   |
| H | 4.240895849  | -5.808457605 | -1.078122327 |
| H | -2.912161806 | -2.079667359 | 5.929135614  |
| H | 4.551516414  | -5.295238897 | 0.593094715  |
| H | -2.836349029 | -3.485202563 | 4.850373149  |
| C | 3.766415044  | -5.561151809 | -0.12515381  |
| C | -2.261281894 | -2.64451662  | 5.257617912  |
| H | 1.688012224  | -5.163858462 | 1.545702716  |
| H | 0.069078373  | -3.113068521 | 3.995733275  |
| H | 2.882687414  | -3.909781013 | 1.888618263  |
| H | -1.224873729 | -3.536731207 | 2.867839778  |
| H | 3.290246247  | -6.478283936 | 0.2499455    |
| H | -1.455773038 | -3.076668159 | 5.870070278  |
| H | -0.564696022 | 0.9658088    | 0.622041161  |
| C | -0.852633952 | 7.772790063  | -3.533314328 |
| C | -2.095895362 | 8.159214856  | -3.03508955  |
| C | -2.535558955 | 7.617710441  | -1.82868177  |
| C | -1.714444533 | 6.701988271  | -1.155927395 |
| N | -0.513279786 | 6.329484512  | -1.638732756 |
| C | -0.087143734 | 6.852982281  | -2.80446584  |
| H | -0.475165769 | 8.176586207  | -4.470257648 |
| H | -2.712002241 | 8.873891434  | -3.578264884 |
| H | -3.498709657 | 7.897488724  | -1.407447733 |
| C | -2.14484369  | 6.084972595  | 0.152718456  |
| H | -1.385449072 | 6.258460005  | 0.926737872  |
| H | -3.093883814 | 6.505991722  | 0.503381024  |
| H | -2.273537302 | 4.998292001  | 0.053048037  |
| C | 1.268300044  | 6.403505851  | -3.295648503 |
| H | 2.047810718  | 6.654842716  | -2.563959662 |
| H | 1.29047617   | 5.313942501  | -3.431159939 |
| H | 1.528093838  | 6.875199915  | -4.25005274  |

---



**Supplementary Table 66 | Cartesian coordinate of the transition state for protonation of the pyridine nitrogen atom in 1 by LutH<sup>+</sup> [TS(PY)]. Units are presented in Å.**

SCF energy (in toluene) = -4289.74661785 hartree

ZPE = 1.437743 hartree

imaginary frequency: 1314i

---

| Atom | Coordinates (Angstroms) |              |              |
|------|-------------------------|--------------|--------------|
|      | X                       | Y            | Z            |
| Mo   | -2.008275243            | -0.351635214 | 0.15699937   |
| Mo   | 3.172117341             | 0.178217323  | -0.136480457 |
| P    | 3.955004592             | -2.120868773 | 0.721394614  |
| P    | -2.408588027            | 0.819088555  | 2.511765679  |
| N    | -4.517466253            | -0.690967679 | 0.2044093    |
| N    | 5.43606197              | 0.405128314  | -0.068823967 |
| P    | 3.526194956             | 2.577304343  | -0.988886663 |
| P    | -2.482179163            | -1.412205276 | -2.200741146 |
| N    | 0.019660785             | -0.174012001 | -0.001017612 |
| N    | 1.162944422             | -0.026912678 | -0.105445805 |
| N    | -1.473610607            | -3.238301834 | 1.350053248  |
| N    | -1.686595535            | -2.208839815 | 0.925492339  |
| N    | -1.945716143            | 1.526256918  | -0.624479636 |
| N    | -1.702440701            | 2.549883272  | -1.052190737 |
| N    | 2.906498244             | 1.197435365  | 2.850745194  |
| N    | 3.02943072              | 0.833422744  | 1.78135311   |
| N    | 3.210847635             | -0.507207599 | -2.053574569 |
| N    | 3.199973588             | -0.907114985 | -3.11619715  |
| H    | 3.487544468             | -4.262532966 | 3.940262779  |
| H    | -2.389953238            | -0.228827529 | 6.268385088  |
| H    | -3.747355622            | -0.413876968 | 5.161484983  |
| H    | 4.731389932             | -3.043998309 | 3.659149503  |
| C    | 4.07217028              | -3.760961554 | 3.154732769  |
| C    | -2.839828707            | 0.174726037  | 5.349464806  |
| H    | -2.423610105            | -2.0099256   | 3.624998715  |
| H    | 2.931984821             | -1.279001424 | 3.461360965  |
| H    | -3.14020741             | 1.203609396  | 5.559439796  |
| H    | 4.695309403             | -4.520890557 | 2.6772556    |
| H    | -1.259819615            | -1.90429548  | 4.952165688  |
| H    | 1.743804832             | -2.546994379 | 3.783821409  |
| C    | 2.292141056             | -2.028306006 | 2.983672172  |
| C    | -1.55025666             | -1.461473701 | 3.987648271  |

|   |              |              |              |
|---|--------------|--------------|--------------|
| H | 1.479387186  | -4.480258188 | 2.454805781  |
| H | -0.059952227 | 0.089968028  | 5.456806174  |
| C | 3.096305652  | -3.067841647 | 2.180035394  |
| C | -1.818112567 | 0.040408683  | 4.201186486  |
| H | -4.744645584 | 0.345460621  | 3.392591066  |
| H | 5.111706801  | -0.970374563 | 2.494876638  |
| H | 1.566980779  | -1.503846045 | 2.352677236  |
| H | -0.728835588 | -1.627355759 | 3.287052511  |
| H | 6.203473093  | -2.210059011 | 1.877192196  |
| H | -4.740775928 | 1.296606286  | 1.903635378  |
| C | 2.095524691  | -4.102460276 | 1.626457527  |
| C | -0.464909713 | 0.663763792  | 4.610680821  |
| H | 4.655287727  | -5.291604543 | 0.689569761  |
| H | -2.019973084 | 2.976195483  | 4.929248618  |
| H | 1.412985459  | -3.661216268 | 0.889858118  |
| H | 0.274510584  | 0.611238786  | 3.802298658  |
| C | 5.489671327  | -1.434786791 | 1.572604194  |
| C | -4.262280009 | 0.454406836  | 2.413972447  |
| H | 8.140722774  | -0.903329635 | 1.49191125   |
| H | -4.637711663 | -2.056667969 | 3.3325544    |
| H | 2.588629257  | -4.966972233 | 1.16988098   |
| H | -0.541229916 | 1.704039116  | 4.937242519  |
| H | 6.143616961  | -4.339099314 | 0.884351238  |
| H | -3.727090899 | 2.983730616  | 4.436804927  |
| H | -2.360871354 | -4.007294871 | -0.703476386 |
| H | 4.805917735  | 2.616316564  | 1.708661293  |
| C | 5.365192128  | -4.639190289 | 0.171126191  |
| C | -2.71294105  | 3.283019212  | 4.142330524  |
| H | 0.382936085  | -3.913605698 | -2.355493238 |
| H | 2.787566415  | 4.981283631  | 1.894673386  |
| C | 7.580299602  | -0.251948969 | 0.825580005  |
| C | -4.641988495 | -2.035283243 | 2.24576767   |
| H | 5.855971472  | -5.248007792 | -0.602530036 |
| H | -2.69818722  | 4.382890593  | 4.114130493  |
| C | 6.192051312  | -0.388980993 | 0.744953092  |
| C | -4.41371787  | -0.808951188 | 1.596192978  |
| H | -1.646635657 | -5.145838754 | -1.843990138 |
| H | 5.088146373  | 4.332783442  | 2.02002462   |
| H | -0.039455081 | -2.699020764 | -1.130125712 |
| H | 2.247319041  | 3.319449113  | 1.609530374  |
| C | -2.272013233 | -4.244938066 | -1.762700376 |
| C | 4.992471418  | 3.578162191  | 1.225622622  |
| C | -0.143950752 | -2.963295918 | -2.185846139 |
| C | 2.575699779  | 4.236538151  | 1.112953671  |
| H | -5.083123346 | -4.135265433 | 2.014706934  |
| H | 9.309365031  | 0.825072347  | 0.099104068  |
| C | 4.686170337  | -3.432978801 | -0.508241329 |

|   |              |              |              |
|---|--------------|--------------|--------------|
| C | -2.338035953 | 2.757471563  | 2.74087783   |
| H | -3.264265637 | -4.513613395 | -2.148488198 |
| H | 5.959453573  | 3.525268367  | 0.712101858  |
| C | -4.878857663 | -3.19028918  | 1.517845245  |
| C | 8.228822479  | 0.70827984   | 0.052668369  |
| H | 0.37183164   | -2.193537405 | -2.772574887 |
| H | 1.742311648  | 4.61798457   | 0.514910917  |
| H | 2.779881408  | -4.479339309 | -0.901216315 |
| H | -0.14977304  | 2.805907377  | 3.052677093  |
| H | 6.660144474  | -2.495363725 | -0.801051459 |
| H | -4.36997634  | 3.319824942  | 2.101487246  |
| C | -1.621797105 | -3.125710289 | -2.602692563 |
| C | 3.85298742   | 4.011281624  | 0.274485542  |
| C | 3.567003235  | -3.945585604 | -1.441513791 |
| C | -0.907145069 | 3.213057734  | 2.376212755  |
| C | 5.757938349  | -2.734444002 | -1.375469073 |
| C | -3.3300067   | 3.428424683  | 1.766031383  |
| H | 6.057779786  | -3.419799773 | -2.181613421 |
| H | -3.116124281 | 4.506759992  | 1.73965338   |
| H | -1.166783274 | -4.602511535 | -4.09713969  |
| H | 4.542837265  | 6.052956965  | 0.444288333  |
| C | 7.458392855  | 1.514913788  | -0.781593813 |
| C | -4.81463021  | -3.113083164 | 0.112167139  |
| H | 3.104029386  | -3.135260702 | -2.010627254 |
| H | -0.635811101 | 2.923665904  | 1.356062074  |
| C | 6.071298084  | 1.350703082  | -0.820724919 |
| C | -4.587204803 | -1.902239789 | -0.511882967 |
| C | -1.659418635 | -3.619578184 | -4.062218949 |
| C | 4.285487427  | 5.348062121  | -0.360278095 |
| H | -2.681272442 | -3.759789307 | -4.433125322 |
| H | 5.177932174  | 5.242980775  | -0.990543492 |
| H | 4.004388405  | -4.649225637 | -2.165666168 |
| H | -0.850202318 | 4.309733893  | 2.440386161  |
| H | -4.904263834 | -4.010154552 | -0.493072159 |
| H | 7.921385951  | 2.277057626  | -1.403746792 |
| H | 5.39329985   | -1.815501052 | -1.841261026 |
| H | -3.246632411 | 3.057115985  | 0.745893623  |
| H | -0.499437768 | -0.957820081 | -4.515462195 |
| H | 1.629234173  | 5.05551842   | -1.578401178 |
| C | -4.342665002 | -1.805590965 | -1.985218668 |
| C | 5.231091091  | 2.227912005  | -1.711931778 |
| H | -1.11579631  | -2.969491599 | -4.754189033 |
| H | 3.494670085  | 5.815546086  | -0.955124229 |
| H | -4.647502071 | -2.720890763 | -2.503161745 |
| H | 5.786957657  | 3.135256177  | -1.978778548 |
| H | -0.549627858 | 0.471807203  | -3.468692132 |
| H | 0.722715922  | 3.531243699  | -1.433023828 |

|   |              |              |              |
|---|--------------|--------------|--------------|
| C | -1.078749984 | -0.062664636 | -4.26644265  |
| C | 1.375501908  | 4.120431456  | -2.088005315 |
| H | -4.894344757 | -0.966783112 | -2.427270479 |
| H | 5.024705762  | 1.693559913  | -2.651089773 |
| C | -2.528519573 | -0.386133744 | -3.857524352 |
| C | 2.619253547  | 3.327181192  | -2.534415047 |
| H | -2.77801342  | 1.562019652  | -2.851362692 |
| H | 1.489820522  | 1.466833281  | -2.827825085 |
| H | -1.081883934 | 0.583220249  | -5.156720549 |
| H | 0.787126776  | 4.387793736  | -2.97794447  |
| C | -3.262532308 | 0.945310199  | -3.605213992 |
| C | 2.130438981  | 2.147653076  | -3.397444884 |
| H | -2.75156608  | -1.916156814 | -5.452955718 |
| H | 3.891668029  | 5.10602906   | -2.919450281 |
| H | -4.284526298 | -1.416102987 | -4.719245984 |
| H | 4.363368021  | 3.664803129  | -3.841297768 |
| C | -3.285432541 | -1.072548166 | -5.018724307 |
| C | 3.510455011  | 4.217168481  | -3.428564051 |
| H | -3.269569159 | 1.518793599  | -4.543745493 |
| H | 1.548002564  | 2.544728178  | -4.242204992 |
| H | -4.311888622 | 0.795553014  | -3.321214054 |
| H | 2.955288867  | 1.563846268  | -3.819760522 |
| H | -3.429249284 | -0.335732155 | -5.822381027 |
| H | 2.911680946  | 4.56335313   | -4.284210543 |
| H | -5.52407758  | 0.15099868   | -0.161470683 |
| C | -8.986672738 | 2.115345813  | -0.943808229 |
| C | -9.003609756 | 0.846658544  | -0.363629133 |
| C | -7.803663073 | 0.185126365  | -0.105415388 |
| N | -6.617267165 | 0.780124038  | -0.415665842 |
| C | -6.578073379 | 2.016469958  | -0.97112513  |
| C | -7.764238697 | 2.703021837  | -1.249181408 |
| H | -9.918179482 | 2.637483439  | -1.152269561 |
| H | -9.941667342 | 0.36073191   | -0.109806289 |
| H | -7.710778697 | 3.691311358  | -1.698881833 |
| C | -5.242801128 | 2.634324006  | -1.262270268 |
| H | -5.092139953 | 3.524169505  | -0.637652093 |
| H | -4.425460873 | 1.937583938  | -1.073337355 |
| H | -5.187003377 | 2.961951362  | -2.307568133 |
| C | -7.788988239 | -1.18504005  | 0.509961465  |
| H | -7.204697861 | -1.205092282 | 1.437773181  |
| H | -8.80911646  | -1.507107915 | 0.739496547  |
| H | -7.339620705 | -1.921881835 | -0.166858851 |

---

**Supplementary Table 67 | Cartesian coordinate of the product complex for protonation of the pyridine nitrogen atom in 1 by LutH<sup>+</sup> [II-Lut(PY)]. Units are presented in Å.**

SCF energy (in toluene) = -4289.76769226 hartree

ZPE = 1.441601 hartree

```

-----
Atom          Coordinates (Angstroms)
          X           Y           Z
-----
Mo    -2.042672051   -0.591944169    0.205448605
Mo     3.125715073     0.2184401   -0.076894958
P      4.04835294    -2.038031725    0.760056994
P     -2.337587734     0.654659753    2.628047179
N     -4.292557075    -0.747668009   -0.021783706
N      5.379445205     0.559020699   -0.109471295
P      3.321312824     2.641963239   -0.922070289
P     -2.372036119    -1.660032687   -2.267604159
N      0.02768783    -0.283023791    0.051669931
N      1.167241197    -0.09038185   -0.019268718
N     -1.263144392    -3.482539033    1.262026528
N     -1.573800135    -2.466703494    0.878013084
N     -2.230503418     1.321280176   -0.458711943
N     -2.202071625     2.389395188   -0.834282414
N      2.916742244     1.248901094    2.916976921
N      3.01407523     0.879848316    1.848813181
N      3.167783975    -0.455263928   -2.003152105
N      3.166770038    -0.839714584   -3.070135586
H      3.827498394    -4.122084923    4.040076766
H     -2.472316777    -0.623920652    6.295334093
H     -3.807811411    -0.541288152    5.146415674
H      5.019717571    -2.884195118    3.641191664
C      4.348756439    -3.633459032    3.203719524
C     -2.84561651    -0.084404582    5.412614792
H     -2.50447972    -2.215192609    3.612803122
H      3.114948142    -1.214317682    3.561679676
H     -3.03208079     0.946983171    5.717981579
H      4.959480425    -4.395259144    2.713056809
H     -1.344002639    -2.216229768    4.944072272
H      1.985051244    -2.522728682     3.92224883
C      2.485627605    -1.984753708    3.103827617
C     -1.60860584    -1.720705426    3.998352053
H      1.768517112    -4.484060527    2.641362808
H     -0.065444514    -0.288112923    5.553317269

```

|   |              |              |              |
|---|--------------|--------------|--------------|
| C | 3.29633326   | -2.996478065 | 2.271257481  |
| C | -1.811265382 | -0.21841423  | 4.27645954   |
| H | -4.744334223 | 0.044841978  | 3.208635531  |
| H | 5.245897736  | -0.820340864 | 2.462089293  |
| H | 1.7187955    | -1.486473582 | 2.501035304  |
| H | -0.790500432 | -1.89500088  | 3.295303085  |
| H | 6.354445953  | -2.018141072 | 1.795606394  |
| H | -4.597088415 | 1.097093448  | 1.801037319  |
| C | 2.315025155  | -4.079108714 | 1.777739431  |
| C | -0.43307643  | 0.325609563  | 4.718390794  |
| H | 4.843630409  | -5.186244698 | 0.721698475  |
| H | -1.804172549 | 2.706437444  | 5.094351599  |
| H | 1.568225285  | -3.672718575 | 1.084781909  |
| H | 0.308621517  | 0.257242405  | 3.912922666  |
| C | 5.595060675  | -1.275171624 | 1.523758952  |
| C | -4.137966478 | 0.244418883  | 2.314597282  |
| H | 8.220007546  | -0.641506066 | 1.283373734  |
| H | -4.53645251  | -2.336706867 | 2.998622729  |
| H | 2.818467398  | -4.920905601 | 1.291871072  |
| H | -0.45734465  | 1.360524601  | 5.068782433  |
| H | 6.312523492  | -4.191429689 | 0.838089805  |
| H | -3.542752509 | 2.767219213  | 4.729129923  |
| H | -2.643145866 | -4.172089892 | -0.639971628 |
| H | 4.741517421  | 2.74211407   | 1.700230408  |
| C | 5.508798407  | -4.51794137  | 0.165685839  |
| C | -2.546308277 | 3.054722065  | 4.372856712  |
| H | -0.015605458 | -4.655795879 | -2.385227226 |
| H | 2.654606371  | 5.064119375  | 1.970999122  |
| C | 7.59383377   | -0.014008061 | 0.653873854  |
| C | -4.575654498 | -2.212604154 | 1.919294689  |
| H | 5.978864366  | -5.118929013 | -0.626661394 |
| H | -2.508719117 | 4.154102718  | 4.382878801  |
| C | 6.209469764  | -0.205896038 | 0.656171092  |
| C | -4.085887649 | -0.961859457 | 1.379011289  |
| H | -2.174882734 | -5.455979888 | -1.756958504 |
| H | 4.978453617  | 4.468931272  | 1.991339823  |
| H | -0.139734198 | -3.341523343 | -1.202953582 |
| H | 2.183557888  | 3.369598063  | 1.779354618  |
| C | -2.634644475 | -4.459255882 | -1.69129075  |
| C | 4.867995103  | 3.707904189  | 1.20528533   |
| C | -0.335570294 | -3.613011601 | -2.244515163 |
| C | 2.430657886  | 4.282224652  | 1.230318566  |
| H | -5.562130086 | -4.076358429 | 1.579833709  |
| H | 9.230075454  | 1.132059187  | -0.172358432 |
| C | 4.766555107  | -3.33537414  | -0.489627141 |
| C | -2.290254032 | 2.584377487  | 2.924283771  |
| H | -3.67022642  | -4.563181061 | -2.033558579 |

|   |              |              |              |
|---|--------------|--------------|--------------|
| H | 5.80736987   | 3.687794196  | 0.640967433  |
| C | -5.15019563  | -3.170806393 | 1.141899998  |
| C | 8.154188267  | 0.972099153  | -0.154689997 |
| H | 0.29814762   | -2.987273622 | -2.880377225 |
| H | 1.541243241  | 4.600269667  | 0.678741401  |
| H | 2.873962644  | -4.435607139 | -0.792916766 |
| H | -0.089727467 | 2.612911121  | 3.059066549  |
| H | 6.701754277  | -2.351323069 | -0.866579126 |
| H | -4.383100371 | 3.112397441  | 2.494302469  |
| C | -1.835833261 | -3.500120227 | -2.599597339 |
| C | 3.662084114  | 4.092663982  | 0.317872094  |
| C | 3.620640116  | -3.882333422 | -1.369836473 |
| C | -0.895381969 | 3.06304683   | 2.467798417  |
| C | 5.781990767  | -2.612099897 | -1.402523241 |
| C | -3.381261854 | 3.283712281  | 2.080639323  |
| H | 6.063517674  | -3.290941073 | -2.220341165 |
| H | -3.201995547 | 4.36776237   | 2.119943687  |
| H | -1.791200198 | -5.073987836 | -4.071629394 |
| H | 4.291664996  | 6.157171147  | 0.429011006  |
| C | 7.30556626   | 1.748481919  | -0.940353649 |
| C | -5.159765423 | -2.995253364 | -0.284797752 |
| H | 3.108556006  | -3.086607479 | -1.917920897 |
| H | -0.710134698 | 2.827964527  | 1.414467591  |
| C | 5.926048473  | 1.528739273  | -0.897494008 |
| C | -4.691715637 | -1.855792526 | -0.850858792 |
| C | -2.058732191 | -4.007628218 | -4.040180079 |
| C | 4.006149012  | 5.43791556   | -0.352738105 |
| H | -3.108830051 | -3.932738286 | -4.349786418 |
| H | 4.857157343  | 5.359559293  | -1.041492469 |
| H | 4.042895117  | -4.575851596 | -2.11208184  |
| H | -0.823445254 | 4.153846996  | 2.587969253  |
| H | -5.460305224 | -3.81714011  | -0.928073868 |
| H | 7.701488365  | 2.527921036  | -1.586785544 |
| H | 5.377044891  | -1.702758164 | -1.852969856 |
| H | -3.385681974 | 3.000185766  | 1.028534874  |
| H | -0.306241132 | -1.86278518  | -4.701348008 |
| H | 1.269803086  | 5.027333548  | -1.39217853  |
| C | -4.289585096 | -1.68558774  | -2.275512163 |
| C | 4.998518486  | 2.368994144  | -1.738742062 |
| H | -1.438948492 | -3.502214242 | -4.785056007 |
| H | 3.161035116  | 5.87364878   | -0.894812197 |
| H | -4.700176043 | -2.473254073 | -2.91578752  |
| H | 5.498757327  | 3.30144844   | -2.027791125 |
| H | 0.188167212  | -0.671413167 | -3.483877662 |
| H | 0.457032546  | 3.461022227  | -1.167570289 |
| C | -0.508429426 | -0.862633581 | -4.308628747 |
| C | 1.029549627  | 4.07462803   | -1.874488803 |

|   |              |              |              |
|---|--------------|--------------|--------------|
| H | -4.610659675 | -0.713787525 | -2.675036393 |
| H | 4.769673327  | 1.830088683  | -2.67006316  |
| C | -1.978242738 | -0.657655784 | -3.886792461 |
| C | 2.27706648   | 3.33877901   | -2.403113861 |
| H | -1.393899666 | 1.189216624  | -2.865478537 |
| H | 1.218050966  | 1.428454649  | -2.602362689 |
| H | -0.269041166 | -0.148102289 | -5.10936469  |
| H | 0.364994983  | 4.30088481   | -2.720791125 |
| C | -2.152135972 | 0.837311044  | -3.567584997 |
| C | 1.78515563   | 2.130418766  | -3.222345531 |
| H | -2.869331466 | -2.031364637 | -5.390933777 |
| H | 3.419792799  | 5.179523343  | -2.885518165 |
| H | -3.969733024 | -0.761070074 | -4.830031118 |
| H | 3.919521176  | 3.752566518  | -3.814680272 |
| C | -2.922866247 | -0.992074137 | -5.062786351 |
| C | 3.06157243   | 4.262494922  | -3.359982978 |
| H | -2.039241298 | 1.413071235  | -4.497687602 |
| H | 1.126353208  | 2.491401407  | -4.025820695 |
| H | -3.140167159 | 1.076335552  | -3.157817107 |
| H | 2.60437615   | 1.581003247  | -3.698077918 |
| H | -2.641781233 | -0.364541786 | -5.921021422 |
| H | 2.395704379  | 4.560908591  | -4.183262266 |
| H | -4.793199413 | 0.124380653  | -0.278542667 |
| C | -8.994510301 | 2.853000001  | -0.835004935 |
| C | -8.934959985 | 1.732257634  | -0.010658696 |
| C | -7.740266729 | 1.004971185  | 0.070420612  |
| N | -6.637566238 | 1.356004912  | -0.628309176 |
| C | -6.69971547  | 2.435934071  | -1.43823322  |
| C | -7.860926597 | 3.209012491  | -1.561832518 |
| H | -9.910291644 | 3.435968818  | -0.914116733 |
| H | -9.800448767 | 1.415734935  | 0.566682448  |
| H | -7.868224414 | 4.071924806  | -2.223518832 |
| C | -5.468499176 | 2.774115179  | -2.239018816 |
| H | -5.593569333 | 3.715425282  | -2.785223153 |
| H | -4.583654576 | 2.864394885  | -1.598463646 |
| H | -5.26078367  | 1.986208472  | -2.976796189 |
| C | -7.64880436  | -0.212198453 | 0.956521976  |
| H | -6.991489002 | -0.026587981 | 1.817070648  |
| H | -8.633827906 | -0.492009271 | 1.34581122   |
| H | -7.237458167 | -1.068303041 | 0.408814819  |

---



**Supplementary Table 68 | Cartesian coordinate of the reactant complex for coordination of dinitrogen to XXII. Units are presented in Å.**

SCF energy (in toluene) = -2833.52870426 hartree

ZPE = 0.670416 hartree

```

-----
Atom          Coordinates (Angstroms)
          X              Y              Z
-----
Mo  -0.166437016    0.495192316    0.319616191
P    0.401533206   -0.965165018    2.397683631
N    1.886034836    1.13740604     0.806901809
P    0.368551253    1.996082139   -1.684918994
N   -1.31748157     1.490038416    1.129143317
H   -0.939310269   -1.940819456    5.876810026
H    0.610550112   -1.201786857    5.462383292
C   -0.183904798   -1.857432111    5.082894672
H   -0.886535701    0.741558751    4.689852214
H    0.232736032   -2.857845756    4.929879572
H   -2.367826877   -0.191703436    4.897138879
C   -1.557040893    0.031759696    4.190564461
H   -2.672666841   -2.428570629    4.148041114
C   -0.867597979   -1.297583205    3.817196604
H    0.684236574    1.20695687     3.412088597
H   -2.005339018    0.522143615    3.320564064
H    1.981919352    0.173291686    4.019450127
C   -1.957264306   -2.272747182    3.328252354
H    2.329841135   -2.490684008    4.305886879
H   -2.500653967   -1.877355722    2.465563127
C    1.423140324    0.450436435    3.119357154
H    3.955432787    1.404843863    3.467688342
H   -1.560777157   -3.249708056    3.042806914
H    3.384465987   -1.522833065    3.250189887
H   -0.196154983    3.673085418    0.795630583
C    2.74412401    -2.412585284    3.296367188
H   -1.347427987    5.387345775   -1.382455058
C    3.62458281     1.481347773    2.435574383
H    3.396844858   -3.283283036    3.143103101
C    2.343250873    1.041836218    2.093053316
H    0.383976524    5.270996096    0.286650056
H   -1.966363994    3.748117802   -1.123633705
C    0.498441571    4.189669928    0.127630871
C   -1.22548015     4.336649662   -1.679916414

```

|   |              |              |              |
|---|--------------|--------------|--------------|
| H | 5.460146298  | 2.352416752  | 1.705661826  |
| C | 1.666111331  | -2.412640336 | 2.193544081  |
| H | 1.522311183  | 3.928312714  | 0.418632678  |
| C | 4.459864469  | 2.007231867  | 1.453515768  |
| H | -1.46336639  | 4.271607257  | -2.746698715 |
| H | 0.526575718  | -4.037143728 | 3.159950231  |
| H | 2.942178596  | -1.297693325 | 0.771746156  |
| C | 0.217744989  | 3.892705286  | -1.361734978 |
| C | 0.931859578  | -3.770413255 | 2.178269937  |
| C | 2.368239149  | -2.230264726 | 0.827146626  |
| H | 3.081667747  | -3.055037081 | 0.690206603  |
| H | 1.062374803  | 5.780995504  | -1.976377088 |
| C | 3.999561039  | 2.073980497  | 0.138907526  |
| H | 0.122204051  | -3.801845094 | 1.442405464  |
| C | 2.712208521  | 1.632837197  | -0.166818252 |
| C | 1.22514743   | 4.716071175  | -2.193504595 |
| H | 2.264051659  | 4.493633341  | -1.91941815  |
| H | 1.656275272  | -4.54961927  | 1.903761876  |
| H | 4.632921081  | 2.461446625  | -0.654537719 |
| H | 1.664718414  | -2.281097823 | -0.012048629 |
| H | -2.211539456 | 2.256024064  | -3.248706465 |
| C | 2.212522009  | 1.643804373  | -1.587870529 |
| H | 1.116066683  | 4.583562003  | -3.271525622 |
| H | 2.816263991  | 2.321447284  | -2.201978479 |
| H | -1.989847465 | 0.562328681  | -2.758411612 |
| C | -1.675851167 | 1.32727694   | -3.473846212 |
| H | 2.340944688  | 0.638286583  | -2.012929355 |
| C | -0.14222532  | 1.520353089  | -3.479434577 |
| H | 0.391967566  | -0.590763363 | -3.069346882 |
| H | -1.99382257  | 1.001246709  | -4.473857966 |
| C | 0.538093481  | 0.177419449  | -3.833505806 |
| H | -0.291506991 | 3.49630546   | -4.459076625 |
| H | 1.32275138   | 2.75159954   | -4.582307066 |
| C | 0.24499264   | 2.547267179  | -4.560985228 |
| H | 0.089129156  | -0.199979101 | -4.762341591 |
| H | 1.611048852  | 0.299829947  | -4.028191512 |
| H | -0.023629777 | 2.130076753  | -5.541713902 |
| S | -1.217834038 | -2.438970717 | -0.96159332  |
| O | -0.123841572 | -3.314752271 | -1.390088596 |
| O | -1.9508965   | -2.727935039 | 0.274958494  |
| O | -0.77440974  | -0.9234811   | -1.056252527 |
| C | -2.48644718  | -2.429377482 | -2.335122533 |
| F | -3.425704471 | -1.51194419  | -2.068146939 |
| F | -1.898463454 | -2.130401773 | -3.498474074 |
| F | -3.045495702 | -3.633480791 | -2.409118804 |
| N | -5.591815474 | 2.087873758  | 1.201388853  |
| N | -4.491273542 | 2.089619161  | 1.320142287  |

H    -2.268086065    1.807945783    1.344789289

---

**Supplementary Table 69 | Cartesian coordinate of the transition state for coordination of dinitrogen to XXII. Units are presented in Å.**

SCF energy (in toluene) = 2833.52111384 hartree

ZPE = 0.671330 hartree

Imaginary frequency: 73i

---

| Atom | Coordinates (Angstroms) |              |              |
|------|-------------------------|--------------|--------------|
|      | X                       | Y            | Z            |
| Mo   | -0.179897479            | 0.598195977  | 0.369873802  |
| P    | 0.389240015             | -0.923617925 | 2.439437557  |
| N    | 1.902994268             | 1.068236769  | 0.742476868  |
| P    | 0.363182843             | 2.070693848  | -1.679404289 |
| N    | -0.96571857             | 1.785008657  | 1.358886644  |
| H    | -0.998043382            | -1.764517736 | 5.942828017  |
| H    | 0.55181017              | -1.024447763 | 5.526822561  |
| C    | -0.228081347            | -1.704937981 | 5.160856729  |
| H    | -0.937555865            | 0.90513188   | 4.536327974  |
| H    | 0.202287523             | -2.705699548 | 5.056815791  |
| H    | -2.36104106             | -0.058306523 | 4.931454078  |
| C    | -1.606753234            | 0.124602107  | 4.154153018  |
| H    | -2.71984976             | -2.306806584 | 4.178444007  |
| C    | -0.889336527            | -1.20929288  | 3.85833174   |
| H    | 0.765181639             | 1.281365248  | 3.365737534  |
| H    | -2.133576111            | 0.504403662  | 3.27289057   |
| H    | 2.035909346             | 0.217003787  | 3.990555827  |
| C    | -1.959576628            | -2.217810728 | 3.389652613  |
| H    | 2.239298779             | -2.415872916 | 4.437675802  |
| H    | -2.454250579            | -1.891067692 | 2.470380001  |
| C    | 1.46630867              | 0.482442387  | 3.094349297  |
| H    | 4.0601848               | 1.282194178  | 3.335868515  |
| H    | -1.554918136            | -3.215529297 | 3.206327818  |
| H    | 3.35444479              | -1.519144995 | 3.381917137  |
| H    | 0.284292844             | 3.727036432  | 0.846124163  |
| C    | 2.684030854             | -2.385382648 | 3.439156503  |
| H    | -1.06781375             | 5.566652374  | -1.222276817 |
| C    | 3.705302493             | 1.347244533  | 2.311001168  |
| H    | 3.31375852              | -3.280048536 | 3.335966802  |
| C    | 2.388705899             | 0.983171656  | 2.020650119  |
| H    | 0.798360802             | 5.327298322  | 0.278082337  |
| H    | -1.741519447            | 3.979606978  | -0.813083415 |

|   |              |              |              |
|---|--------------|--------------|--------------|
| C | 0.880554964  | 4.247249273  | 0.092174271  |
| C | -1.049732274 | 4.500680075  | -1.487596123 |
| H | 5.576948029  | 2.056175654  | 1.500560203  |
| C | 1.644135358  | -2.397115394 | 2.297679642  |
| H | 1.934205929  | 3.977929307  | 0.231350214  |
| C | 4.547163607  | 1.777485387  | 1.288186946  |
| H | -1.43500201  | 4.413655985  | -2.508993795 |
| H | 0.473439868  | -3.985932691 | 3.280462595  |
| H | 3.009920626  | -1.348400591 | 0.910980697  |
| C | 0.393108629  | 3.971789026  | -1.347806215 |
| C | 0.894997547  | -3.746508271 | 2.298299048  |
| C | 2.409779126  | -2.263880088 | 0.960949512  |
| H | 3.108395036  | -3.108826123 | 0.883560955  |
| H | 1.350388403  | 5.793163842  | -1.994741064 |
| C | 4.051545124  | 1.840787487  | -0.012819236 |
| H | 0.096456239  | -3.785844492 | 1.551450018  |
| C | 2.724952718  | 1.490700982  | -0.267539616 |
| C | 1.342016703  | 4.736597119  | -2.296839534 |
| H | 2.37717336   | 4.379253226  | -2.223408893 |
| H | 1.615432109  | -4.538977904 | 2.053429022  |
| H | 4.683358152  | 2.163754593  | -0.835725837 |
| H | 1.751305304  | -2.317591475 | 0.089420893  |
| H | -2.313619471 | 2.354307789  | -3.002791117 |
| C | 2.168152879  | 1.543357819  | -1.664357594 |
| H | 1.03792309   | 4.701240388  | -3.343497616 |
| H | 2.806661277  | 2.158939007  | -2.308027854 |
| H | -2.046020224 | 0.633579118  | -2.649570532 |
| C | -1.796024902 | 1.446617145  | -3.336370411 |
| H | 2.175824906  | 0.529368992  | -2.086720837 |
| C | -0.269642528 | 1.652489753  | -3.455684277 |
| H | 0.318152017  | -0.463115586 | -3.177192187 |
| H | -2.198412551 | 1.186658836  | -4.325267018 |
| C | 0.396033001  | 0.33628007   | -3.917275074 |
| H | -0.513146368 | 3.659957676  | -4.356562918 |
| H | 1.085981126  | 2.926183028  | -4.646406401 |
| C | 0.015756295  | 2.717556946  | -4.532252002 |
| H | -0.116153509 | -0.007303502 | -4.826008279 |
| H | 1.450904077  | 0.484124634  | -4.181526549 |
| H | -0.34104273  | 2.32620791   | -5.495438937 |
| S | -0.960021492 | -2.4326099   | -0.971404531 |
| O | 0.136858196  | -3.334160534 | -1.328761073 |
| O | -1.768682346 | -2.693210192 | 0.225801811  |
| O | -0.490502063 | -0.933917615 | -1.036044788 |
| C | -2.157046893 | -2.474209058 | -2.408129534 |
| F | -3.127201463 | -1.565324079 | -2.22134658  |
| F | -1.52062678  | -2.203374501 | -3.55172035  |
| F | -2.695098811 | -3.688213496 | -2.469433896 |

|   |              |             |             |
|---|--------------|-------------|-------------|
| N | -3.118615827 | 0.165043661 | 0.164969935 |
| N | -4.216952629 | 0.11818306  | 0.299266111 |
| H | -1.749265864 | 2.280649503 | 1.788778385 |

---

**Supplementary Table 70 | Cartesian coordinate of the reactant complex for coordination of dinitrogen to XI. Units are presented in Å.**

SCF energy (in toluene) = -2833.09593003 hartree

ZPE = 0.658862 hartree

```

-----
Atom          Coordinates (Angstroms)
          X           Y           Z
-----
Mo    -0.090846858    0.515515465    0.350721653
P      0.503696831   -0.938863679    2.368875807
N      1.984347419    1.161492734    0.808302074
P      0.428787188    2.013627905   -1.62789221
N     -1.037481938    1.511163978    1.28777066
H     -0.793426309   -1.953547806    5.868777711
H      0.732294809   -1.16188553     5.453877486
C     -0.039387027   -1.845614907    5.074916499
H     -0.802500982    0.717493096    4.696219142
H      0.416816907   -2.830360404    4.927255188
H     -2.281580729   -0.234900808    4.852946906
C     -1.454708003    0.00827203     4.170147397
H     -2.522085709   -2.473632006    4.111684295
C     -0.728733573   -1.305857322    3.805104382
H      0.766248175    1.214525813    3.391244484
H     -1.872106712    0.508748158    3.290609089
H      2.085825759    0.212208835    4.025549191
C     -1.793996543   -2.3042444     3.304313659
H      2.564897853   -2.363516577    4.226739793
H     -2.33842605   -1.919190484    2.435554256
C      1.531141142     0.4769902     3.117824516
H      4.051507904    1.472039844    3.470237439
H     -1.374006053   -3.275763678    3.03009089
H      3.532487952   -1.407995054     3.0800297
H     -0.226726527    3.703987153     0.78270022
C      2.924815392   -2.314376261    3.192745549
H     -1.249255618    5.434094009   -1.406047691
C      3.721711726    1.540794262    2.436593293
H      3.594206743   -3.173413451    3.036861784
C      2.445213228    1.081986621    2.095940322
H      0.415083907    5.298369179     0.308945183
H     -1.895390442    3.793856495   -1.213240584
C      0.510238538    4.213010312     0.155374077
C     -1.125578402    4.387679935   -1.72124742

```

|   |              |              |              |
|---|--------------|--------------|--------------|
| H | 5.548226846  | 2.434448486  | 1.706009568  |
| C | 1.780798442  | -2.379660834 | 2.161854846  |
| H | 1.511436064  | 3.921209843  | 0.49405193   |
| C | 4.553308267  | 2.073010126  | 1.454461828  |
| H | -1.31057369  | 4.34881412   | -2.800711609 |
| H | 0.732268025  | -3.996894023 | 3.244520969  |
| H | 2.904655784  | -1.296947585 | 0.594100538  |
| C | 0.295014588  | 3.917783004  | -1.345138032 |
| C | 1.096018901  | -3.760718987 | 2.238859645  |
| C | 2.376157945  | -2.246277466 | 0.740333527  |
| H | 3.104944923  | -3.05509995  | 0.580087822  |
| H | 1.18417939   | 5.79425717   | -1.945351552 |
| C | 4.090387464  | 2.124585688  | 0.138184994  |
| H | 0.268238702  | -3.841872017 | 1.527706098  |
| C | 2.80999616   | 1.661832481  | -0.162862828 |
| C | 1.346984502  | 4.723354188  | -2.136207997 |
| H | 2.368529217  | 4.494133404  | -1.806743321 |
| H | 1.840294715  | -4.52800007  | 1.976947808  |
| H | 4.714947128  | 2.521442514  | -0.658360341 |
| H | 1.595376581  | -2.350143496 | -0.023390534 |
| H | -2.092235224 | 2.405673128  | -3.296003214 |
| C | 2.289263806  | 1.670312297  | -1.574914932 |
| H | 1.292041632  | 4.571872977  | -3.217483492 |
| H | 2.888631653  | 2.335516178  | -2.207368248 |
| H | -1.982986646 | 0.719876408  | -2.749404489 |
| C | -1.604194357 | 1.443098014  | -3.478516515 |
| H | 2.39391976   | 0.659060628  | -1.991594698 |
| C | -0.061587757 | 1.538594427  | -3.431380372 |
| H | 0.242220839  | -0.588360044 | -2.92316341  |
| H | -1.906635893 | 1.105878997  | -4.481241211 |
| C | 0.506002552  | 0.127646158  | -3.708811703 |
| H | -0.023631502 | 3.479626999  | -4.477537855 |
| H | 1.532613158  | 2.616412548  | -4.511654085 |
| C | 0.44181156   | 2.489296623  | -4.532836451 |
| H | 0.065652637  | -0.247317354 | -4.643866636 |
| H | 1.594429476  | 0.133851832  | -3.8505577   |
| H | 0.182891786  | 2.065001165  | -5.514499989 |
| S | -1.926991501 | -2.13705718  | -0.644058947 |
| O | -0.943064314 | -3.160586562 | -0.239920235 |
| O | -3.175783088 | -2.027786108 | 0.122087024  |
| O | -1.278860205 | -0.778542643 | -0.961384036 |
| C | -2.43743701  | -2.615427015 | -2.371816105 |
| F | -3.277134075 | -1.704002024 | -2.885386897 |
| F | -1.359887025 | -2.703018362 | -3.172451406 |
| F | -3.050736389 | -3.804594342 | -2.348887171 |
| N | -4.169274275 | 1.451549002  | -0.293987996 |
| N | -4.472260442 | 1.023067971  | 0.68092562   |



-----

**Supplementary Table 71 | Cartesian coordinate of the transition state for coordination of dinitrogen to XI. Units are presented in Å.**

SCF energy (in toluene) = -2833.08497954 hartree

ZPE = 0.659524 hartree

Imaginary frequency: 107i

---

| Atom | Coordinates (Angstroms) |              |              |
|------|-------------------------|--------------|--------------|
|      | X                       | Y            | Z            |
| Mo   | 2.492520234             | 0.539474458  | 0.38796536   |
| P    | 3.076442863             | -0.895522673 | 2.443344282  |
| N    | 4.596948531             | 1.081767523  | 0.760714246  |
| P    | 3.003995907             | 2.012261367  | -1.6275705   |
| N    | 1.721135995             | 1.641960782  | 1.378025992  |
| H    | 1.661204676             | -1.8424376   | 5.929188772  |
| H    | 3.269089656             | -1.213884577 | 5.545593638  |
| C    | 2.432029329             | -1.801055983 | 5.145222765  |
| H    | 1.960349161             | 0.829303868  | 4.834681251  |
| H    | 2.777327728             | -2.826247598 | 4.976908097  |
| H    | 0.382293092             | 0.044840674  | 4.95201009   |
| C    | 1.237559389             | 0.214736792  | 4.281984495  |
| H    | -0.093264165            | -2.137273464 | 4.13854386   |
| C    | 1.821265828             | -1.159721431 | 3.884031015  |
| H    | 3.479752224             | 1.275721314  | 3.378272492  |
| H    | 0.888618676             | 0.787227881  | 3.416002356  |
| H    | 4.765096859             | 0.219653164  | 4.004003445  |
| C    | 0.666024623             | -2.032901346 | 3.349043723  |
| H    | 4.91068307              | -2.50241632  | 4.405911562  |
| H    | 0.192032035             | -1.580348936 | 2.472489043  |
| C    | 4.191162854             | 0.485128232  | 3.108548537  |
| H    | 6.77737336              | 1.314011504  | 3.337478938  |
| H    | 0.988505814             | -3.036302692 | 3.058156176  |
| H    | 6.019748953             | -1.593076547 | 3.355988455  |
| H    | 2.666640005             | 3.69158841   | 0.853281412  |
| C    | 5.339016624             | -2.452779403 | 3.399945563  |
| H    | 1.471697993             | 5.480957187  | -1.264988678 |
| C    | 6.413822676             | 1.384180853  | 2.315472445  |
| H    | 5.952826823             | -3.354766011 | 3.259600921  |
| C    | 5.099472065             | 1.001681699  | 2.032339413  |
| H    | 3.262494935             | 5.285267134  | 0.32515701   |
| H    | 0.813125131             | 3.869275959  | -0.929979788 |

|   |              |              |              |
|---|--------------|--------------|--------------|
| C | 3.338919895  | 4.200460166  | 0.157334016  |
| C | 1.532151625  | 4.420148438  | -1.549184789 |
| H | 8.265679526  | 2.140229405  | 1.498037011  |
| C | 4.273661443  | -2.404079919 | 2.285014164  |
| H | 4.369736175  | 3.907621284  | 0.390470257  |
| C | 7.239886561  | 1.841791769  | 1.291723838  |
| H | 1.218870622  | 4.344980823  | -2.596428903 |
| H | 3.039731061  | -3.962238234 | 3.244735647  |
| H | 5.629280855  | -1.37489881  | 0.876345044  |
| C | 2.97260225   | 3.916711683  | -1.316495856 |
| C | 3.477753302  | -3.72663086  | 2.268557717  |
| C | 5.00839925   | -2.276852405 | 0.929551299  |
| H | 5.678195125  | -3.141794867 | 0.813544236  |
| H | 3.899564202  | 5.769416031  | -1.931801318 |
| C | 6.729474963  | 1.903855668  | -0.004433249 |
| H | 2.680739351  | -3.723418681 | 1.518393558  |
| C | 5.40961522   | 1.520884158  | -0.248501451 |
| C | 3.967922209  | 4.703689669  | -2.195184038 |
| H | 5.005762253  | 4.397472395  | -2.009745573 |
| H | 4.166986472  | -4.54474562  | 2.013872805  |
| H | 7.344803384  | 2.247771995  | -0.831959347 |
| H | 4.316794319  | -2.289860929 | 0.081386947  |
| H | 0.371297541  | 2.291518364  | -3.020763744 |
| C | 4.837741533  | 1.558258373  | -1.638902275 |
| H | 3.771442185  | 4.619717637  | -3.266019849 |
| H | 5.453813038  | 2.184325898  | -2.295389758 |
| H | 0.637284009  | 0.5633425    | -2.709635827 |
| C | 0.900886205  | 1.396265661  | -3.367778434 |
| H | 4.859950259  | 0.541424202  | -2.053762098 |
| C | 2.431036353  | 1.600794503  | -3.432388629 |
| H | 2.968637239  | -0.514531929 | -3.100072048 |
| H | 0.527274811  | 1.161138434  | -4.375291493 |
| C | 3.084194185  | 0.266111218  | -3.85744831  |
| H | 2.242459666  | 3.600489557  | -4.358878515 |
| H | 3.839945765  | 2.846727539  | -4.585955665 |
| C | 2.763200106  | 2.648840001  | -4.511037226 |
| H | 2.586943725  | -0.088471628 | -4.771531648 |
| H | 4.148525298  | 0.388896022  | -4.09766509  |
| H | 2.437990362  | 2.2567766    | -5.486343439 |
| S | 1.60571777   | -2.613241158 | -1.033667952 |
| O | 2.648543907  | -3.602079896 | -1.351522801 |
| O | 0.743539798  | -2.866293117 | 0.135547933  |
| O | 2.119660394  | -1.176257384 | -1.107593106 |
| C | 0.447740226  | -2.646089289 | -2.495657317 |
| F | -0.516955778 | -1.716664802 | -2.355221636 |
| F | 1.114205261  | -2.390573333 | -3.634774437 |
| F | -0.130567518 | -3.848220864 | -2.595805102 |

|   |              |             |             |
|---|--------------|-------------|-------------|
| N | -0.30274668  | 0.126739695 | 0.05701126  |
| N | -1.398103237 | 0.259662925 | 0.163431744 |

---

**Supplementary Table 72 | Cartesian coordinate of the reactant complex for protonation of XXIV by LutH<sup>+</sup>. Units are presented in Å.**

SCF energy (in toluene) = -3160.33583475 hartree

ZPE = 0.819388 hartree

-----

| Atom | Coordinates (Angstroms) |              |              |
|------|-------------------------|--------------|--------------|
|      | X                       | Y            | Z            |
| Mo   | -0.668729425            | 0.76408586   | 0.649305018  |
| P    | 0.17206536              | -0.723862687 | 2.669594978  |
| N    | 1.479063577             | 1.338569209  | 0.925011559  |
| P    | -0.220211709            | 2.286539423  | -1.405337272 |
| N    | -1.38343517             | 1.915908552  | 1.674620274  |
| H    | -1.23111363             | -1.812113895 | 6.119427867  |
| H    | 0.312569987             | -1.014167378 | 5.788849624  |
| C    | -0.443110618            | -1.686934099 | 5.362786774  |
| H    | -1.176360017            | 0.908428792  | 4.94663945   |
| H    | 0.013130099             | -2.669399522 | 5.210416941  |
| H    | -2.618660719            | -0.08595654  | 5.179290811  |
| C    | -1.830387923            | 0.173088635  | 4.458206827  |
| H    | -2.889808569            | -2.293603767 | 4.268839877  |
| C    | -1.078713713            | -1.119545677 | 4.077912605  |
| H    | 0.422706644             | 1.509975818  | 3.568025467  |
| H    | -2.301346644            | 0.643291292  | 3.589357945  |
| H    | 1.780884076             | 0.54234306   | 4.176038675  |
| C    | -2.111272563            | -2.120946618 | 3.511573132  |
| H    | 2.038256342             | -2.136501257 | 4.719792374  |
| H    | -2.589694283            | -1.742368441 | 2.602327946  |
| C    | 1.169059667             | 0.754890503  | 3.292985354  |
| H    | 3.740123947             | 1.684101145  | 3.413757963  |
| H    | -1.668830192            | -3.088712577 | 3.262638531  |
| H    | 3.136577223             | -1.151047476 | 3.728408586  |
| H    | -0.178371144            | 3.832780191  | 1.147374867  |
| C    | 2.518023886             | -2.057064007 | 3.740874854  |
| H    | -1.687175409            | 5.752298915  | -0.81655162  |
| C    | 3.333926095             | 1.722926467  | 2.406470932  |
| H    | 3.206106999             | -2.908792349 | 3.645479361  |
| C    | 2.023776953             | 1.294793384  | 2.17615696   |
| H    | 0.210987542             | 5.496245825  | 0.633129045  |
| H    | -2.287719979            | 4.150116558  | -0.342541201 |
| C    | 0.345215567             | 4.430255881  | 0.395781919  |
| C    | -1.662887482            | 4.683018187  | -1.071307434 |

-----

|   |              |              |              |
|---|--------------|--------------|--------------|
| H | 5.133088814  | 2.503390537  | 1.501555373  |
| C | 1.530553624  | -2.109289436 | 2.552889451  |
| H | 1.418184165  | 4.218584901  | 0.466779343  |
| C | 4.107675918  | 2.177553167  | 1.34014071   |
| H | -2.121012683 | 4.573061951  | -2.059771045 |
| H | 0.423506286  | -3.794838567 | 3.448904148  |
| H | 2.909075114  | -0.953873847 | 1.271792335  |
| C | -0.204016016 | 4.182378085  | -1.027368029 |
| C | 0.872359691  | -3.504387529 | 2.492368615  |
| C | 2.356386089  | -1.899389895 | 1.262862485  |
| H | 3.101103938  | -2.705903217 | 1.206626745  |
| H | 0.697721139  | 6.048380767  | -1.635913876 |
| C | 3.55130584   | 2.20146539   | 0.062984063  |
| H | 0.11344583   | -3.576385194 | 1.708006219  |
| C | 2.23030621   | 1.783489197  | -0.120697751 |
| C | 0.677747883  | 5.007627843  | -1.990027041 |
| H | 1.717303245  | 4.656065796  | -1.997864361 |
| H | 1.65428886   | -4.242310723 | 2.265746509  |
| H | 4.129424264  | 2.540298265  | -0.79251737  |
| H | 1.756459618  | -1.958264413 | 0.353483019  |
| H | -2.967392524 | 2.436526945  | -2.541584292 |
| C | 1.594816961  | 1.792721872  | -1.484988146 |
| H | 0.311876614  | 5.022699756  | -3.016858585 |
| H | 2.18415419   | 2.396594106  | -2.184416999 |
| H | -2.554605752 | 0.707633015  | -2.428762591 |
| C | -2.408340751 | 1.618792682  | -3.015196866 |
| H | 1.583047177  | 0.763024463  | -1.867324994 |
| C | -0.907825272 | 1.945411908  | -3.183598044 |
| H | -0.172071557 | -0.133855482 | -3.07002501  |
| H | -2.850556068 | 1.451674033  | -4.007389826 |
| C | -0.186890468 | 0.709402503  | -3.762436301 |
| H | -1.312533891 | 3.989314719  | -3.946453739 |
| H | 0.300910466  | 3.360018736  | -4.370115947 |
| C | -0.748125679 | 3.087460426  | -4.206270109 |
| H | -0.722759402 | 0.388294633  | -4.666159763 |
| H | 0.84213218   | 0.944302753  | -4.06344354  |
| H | -1.141184839 | 2.731456458  | -5.169105631 |
| S | -0.65236241  | -2.446209663 | -0.921823905 |
| O | 0.520712251  | -3.285204579 | -1.196932589 |
| O | -1.528599668 | -2.808812004 | 0.209859514  |
| O | -0.313460144 | -0.947726714 | -0.933741955 |
| C | -1.741504034 | -2.630106463 | -2.428810402 |
| F | -2.776552289 | -1.766877127 | -2.370648087 |
| F | -1.045006393 | -2.380730104 | -3.547478606 |
| F | -2.221119773 | -3.872347755 | -2.479812314 |
| N | -2.627940924 | 0.010282803  | 0.263132999  |
| N | -3.674169065 | -0.35546906  | 0.108948682  |

|   |              |             |             |
|---|--------------|-------------|-------------|
| H | -2.476093069 | 2.930681005 | 2.5010196   |
| C | -2.705592502 | 4.415670054 | 3.964854992 |
| N | -3.177832951 | 3.584166547 | 2.999112131 |
| C | -4.479203271 | 3.532603998 | 2.613456065 |
| C | -5.390261165 | 4.382279874 | 3.23950865  |
| C | -4.949872125 | 5.251525131 | 4.237551175 |
| C | -3.601817926 | 5.269457214 | 4.602281117 |
| H | -3.238711272 | 5.940291276 | 5.37548072  |
| H | -5.655416479 | 5.917121625 | 4.73021045  |
| H | -6.433708958 | 4.354191196 | 2.939170582 |
| C | -1.241606197 | 4.353442165 | 4.288662917 |
| H | -0.977877208 | 5.127606984 | 5.014925917 |
| H | -0.982480552 | 3.375735429 | 4.715794165 |
| H | -0.630546711 | 4.491597568 | 3.388334988 |
| C | -4.858101837 | 2.548649338 | 1.547371855 |
| H | -5.849092379 | 2.780866456 | 1.146364631 |
| H | -4.130890535 | 2.547328725 | 0.728072846 |
| H | -4.888488262 | 1.529048058 | 1.955198224 |

---

**Supplementary Table 73 | Cartesian coordinate of the transition state for protonation of XXIV by LutH<sup>+</sup>. Units are presented in Å.**

SCF energy (in toluene) = -3160.33093009 hartree

ZPE = 0.815146 hartree

Imaginary frequency: 1103i

---

| Atom | Coordinates (Angstroms) |              |              |
|------|-------------------------|--------------|--------------|
|      | X                       | Y            | Z            |
| Mo   | -0.39555315             | 0.497911238  | 0.447894075  |
| P    | 0.403464816             | -0.981896572 | 2.49648311   |
| N    | 1.737689151             | 1.074122439  | 0.762270434  |
| P    | 0.09055375              | 2.017205525  | -1.609439228 |
| N    | -1.139805493            | 1.66902953   | 1.452502621  |
| H    | -1.071890718            | -2.056730301 | 5.914846763  |
| H    | 0.467957967             | -1.240473923 | 5.615037601  |
| C    | -0.267753024            | -1.927104168 | 5.176514348  |
| H    | -1.019858604            | 0.659271222  | 4.713680998  |
| H    | 0.204875224             | -2.904393855 | 5.042314344  |
| H    | -2.451538511            | -0.350086582 | 4.934756119  |
| C    | -1.654822526            | -0.090585074 | 4.223673967  |
| H    | -2.682520092            | -2.569160916 | 4.0353839    |
| C    | -0.88203168             | -1.378454408 | 3.873067863  |
| H    | 0.623427591             | 1.262367939  | 3.383834088  |
| H    | -2.123422442            | 0.363898786  | 3.34553403   |
| H    | 1.969605247             | 0.302720553  | 4.025513461  |
| C    | -1.889505802            | -2.397518841 | 3.293478343  |
| H    | 2.22996746              | -2.363161048 | 4.598453787  |
| H    | -2.353221777            | -2.034105046 | 2.370715143  |
| C    | 1.376354197             | 0.507416238  | 3.128337152  |
| H    | 3.941053612             | 1.446142968  | 3.297833429  |
| H    | -1.431756417            | -3.363502613 | 3.066095491  |
| H    | 3.346667699             | -1.378772483 | 3.626422925  |
| H    | 0.111169841             | 3.576166935  | 0.936587895  |
| C    | 2.733072414             | -2.288110773 | 3.631049062  |
| H    | -1.377952181            | 5.487225326  | -1.058751872 |
| C    | 3.557562831             | 1.474144806  | 2.281410195  |
| H    | 3.428055646             | -3.136366578 | 3.559010737  |
| C    | 2.25396373              | 1.040917961  | 2.026295802  |
| H    | 0.498806138             | 5.234196919  | 0.419149487  |
| H    | -1.987459114            | 3.894457326  | -0.57320895  |



|   |              |              |              |
|---|--------------|--------------|--------------|
| C | 0.639992092  | 4.168789609  | 0.185826292  |
| C | -1.354233499 | 4.415707494  | -1.302588445 |
| H | 5.375335312  | 2.248423742  | 1.40957366   |
| C | 1.776472093  | -2.35723435  | 2.418156646  |
| H | 1.712966125  | 3.961074308  | 0.267370832  |
| C | 4.354280387  | 1.919534936  | 1.228179935  |
| H | -1.803329841 | 4.297164143  | -2.294175589 |
| H | 0.659061974  | -4.043693222 | 3.299353122  |
| H | 3.178200099  | -1.200192015 | 1.162639919  |
| C | 0.103473445  | 3.913773352  | -1.24022459  |
| C | 1.132236857  | -3.758639039 | 2.353226431  |
| C | 2.634948648  | -2.150968775 | 1.149178222  |
| H | 3.38919087   | -2.950050715 | 1.122926558  |
| H | 1.02029964   | 5.771229759  | -1.846800371 |
| C | 3.826913782  | 1.931393568  | -0.061415524 |
| H | 0.396137266  | -3.845473074 | 1.549269338  |
| C | 2.510377095  | 1.512332493  | -0.271095092 |
| C | 0.997492274  | 4.730289701  | -2.199536935 |
| H | 2.035382383  | 4.373569497  | -2.199512385 |
| H | 1.927157796  | -4.491149813 | 2.15652451   |
| H | 4.423712253  | 2.263852567  | -0.906455063 |
| H | 2.061999661  | -2.227369783 | 0.223941273  |
| H | -2.640492965 | 2.153570933  | -2.784245445 |
| C | 1.903496871  | 1.515190999  | -1.64851569  |
| H | 0.638324041  | 4.745934265  | -3.228595419 |
| H | 2.507766944  | 2.116092331  | -2.337514345 |
| H | -2.227633223 | 0.426702297  | -2.652252077 |
| C | -2.073659299 | 1.333227342  | -3.243617438 |
| H | 1.897870596  | 0.484541427  | -2.027936537 |
| C | -0.571919907 | 1.662366115  | -3.393941797 |
| H | 0.172391196  | -0.412947322 | -3.264234755 |
| H | -2.501766871 | 1.157902187  | -4.240454034 |
| C | 0.164611715  | 0.428928679  | -3.957757579 |
| H | -0.97381301  | 3.7020031    | -4.169289338 |
| H | 0.647158092  | 3.076757349  | -4.570635858 |
| C | -0.402815078 | 2.801569391  | -4.418489898 |
| H | -0.354050978 | 0.103292819  | -4.869756635 |
| H | 1.197434845  | 0.668209403  | -4.241655658 |
| H | -0.782891194 | 2.439883237  | -5.384325839 |
| S | -0.338390531 | -2.682309849 | -1.081870301 |
| O | 0.855803144  | -3.494067959 | -1.340557149 |
| O | -1.225073402 | -3.052412803 | 0.036859388  |
| O | -0.018939304 | -1.171633651 | -1.085715226 |
| C | -1.400062641 | -2.884067394 | -2.607543921 |
| F | -2.440217534 | -2.027668786 | -2.574656767 |
| F | -0.683872169 | -2.643096452 | -3.713909173 |
| F | -1.867722217 | -4.130042125 | -2.648812952 |

|   |              |              |             |
|---|--------------|--------------|-------------|
| N | -2.356778843 | -0.256458044 | 0.043369104 |
| N | -3.394955573 | -0.634540776 | -0.12411686 |
| H | -1.96574477  | 2.467333742  | 2.061218232 |
| C | -2.3244737   | 4.115889753  | 3.613262969 |
| N | -2.785232731 | 3.295538319  | 2.637860809 |
| C | -4.075331656 | 3.338789538  | 2.225685058 |
| C | -4.964490154 | 4.246659847  | 2.805472153 |
| C | -4.514348329 | 5.1015441    | 3.80997272  |
| C | -3.182240605 | 5.036003338  | 4.217957958 |
| H | -2.802201463 | 5.689789834  | 4.99832478  |
| H | -5.195163486 | 5.814297228  | 4.270655718 |
| H | -5.996423067 | 4.274323231  | 2.466192292 |
| C | -0.881111446 | 3.985999667  | 4.020038608 |
| H | -0.606546944 | 4.775805709  | 4.725979021 |
| H | -0.702488872 | 3.018553112  | 4.508009311 |
| H | -0.213345689 | 4.048768373  | 3.152584852 |
| C | -4.504363822 | 2.377416896  | 1.15173871  |
| H | -5.511552689 | 2.617463866  | 0.797671404 |
| H | -3.819397648 | 2.40043758   | 0.296041383 |
| H | -4.517753684 | 1.347702792  | 1.53233633  |

---

**Supplementary Table 74 | Cartesian coordinate of the product complex for protonation of XXIV by LutH<sup>+</sup>. Units are presented in Å.**

SCF energy (in toluene) = -3160.33535581 hartree

ZPE = 0.818313 hartree

-----

| Atom | Coordinates (Angstroms) |              |              |
|------|-------------------------|--------------|--------------|
|      | X                       | Y            | Z            |
| Mo   | -0.712471133            | 0.726910071  | 0.704379023  |
| P    | 0.136302394             | -0.767925682 | 2.726204525  |
| N    | 1.395012816             | 1.358607307  | 0.996830048  |
| P    | -0.3316328              | 2.340549388  | -1.299352492 |
| N    | -1.460614769            | 1.867570067  | 1.763745194  |
| H    | -1.275841956            | -1.897973745 | 6.147024136  |
| H    | 0.246726151             | -1.056936705 | 5.831867792  |
| C    | -0.484700319            | -1.751058453 | 5.398267828  |
| H    | -1.295941503            | 0.837146158  | 4.951588735  |
| H    | -0.000942734            | -2.721027733 | 5.249953083  |
| H    | -2.68865594             | -0.212652477 | 5.218485557  |
| C    | -1.922183166            | 0.067397961  | 4.482773294  |
| H    | -2.905839982            | -2.4233774   | 4.280330281  |
| C    | -1.128747199            | -1.20145637  | 4.109158937  |
| H    | 0.331513564             | 1.467055299  | 3.650879107  |
| H    | -2.436318615            | 0.508234262  | 3.623830765  |
| H    | 1.707704663             | 0.519487508  | 4.237992045  |
| C    | -2.12264792             | -2.235170469 | 3.532397679  |
| H    | 2.008709715             | -2.161030535 | 4.777725407  |
| H    | -2.601851806            | -1.873885337 | 2.616743759  |
| C    | 1.090354386             | 0.730600417  | 3.359035006  |
| H    | 3.628051179             | 1.732713941  | 3.505489883  |
| H    | -1.65080354             | -3.192613905 | 3.296769487  |
| H    | 3.096655877             | -1.133251909 | 3.818158337  |
| H    | -0.298283381            | 3.827846758  | 1.32517576   |
| C    | 2.50060767              | -2.05402189  | 3.807814866  |
| H    | -1.916405661            | 5.721828347  | -0.561645598 |
| C    | 3.226625383             | 1.775540498  | 2.49663966   |
| H    | 3.210843201             | -2.886802678 | 3.709027143  |
| C    | 1.932979576             | 1.308296101  | 2.252050726  |
| H    | 0.035086201             | 5.500138487  | 0.833835499  |
| H    | -2.451058726            | 4.092464307  | -0.118271288 |
| C    | 0.193317553             | 4.444946484  | 0.569205723  |
| C    | -1.859712803            | 4.662037044  | -0.846500166 |

-----

|   |              |              |              |
|---|--------------|--------------|--------------|
| H | 5.002553018  | 2.6338134    | 1.618014642  |
| C | 1.532224009  | -2.114952249 | 2.604191081  |
| H | 1.273069251  | 4.261493046  | 0.612270272  |
| C | 3.989384298  | 2.277747388  | 1.444112445  |
| H | -2.333476407 | 4.563531405  | -1.828964705 |
| H | 0.453722654  | -3.834462881 | 3.465438941  |
| H | 2.909430574  | -0.908543407 | 1.37044587   |
| C | -0.381717292 | 4.218371717  | -0.846774273 |
| C | 0.911242285  | -3.525421681 | 2.519277614  |
| C | 2.370476602  | -1.861214095 | 1.330559341  |
| H | 3.127996172  | -2.654646616 | 1.263142391  |
| H | 0.444668277  | 6.128582818  | -1.41347849  |
| C | 3.436899873  | 2.316207705  | 0.16564169   |
| H | 0.16649566   | -3.610393779 | 1.723430621  |
| C | 2.131257241  | 1.861669332  | -0.03466851  |
| C | 0.449371825  | 5.10144203   | -1.804483374 |
| H | 1.499577673  | 4.78605915   | -1.852262485 |
| H | 1.715712675  | -4.24098628  | 2.300621186  |
| H | 4.005158714  | 2.699309926  | -0.677563949 |
| H | 1.783858175  | -1.90506788  | 0.41186117   |
| H | -3.09740858  | 2.435084863  | -2.388534622 |
| C | 1.495895683  | 1.902286557  | -1.398851579 |
| H | 0.054261275  | 5.140959586  | -2.81939898  |
| H | 2.062937081  | 2.557023118  | -2.070141304 |
| H | -2.632060458 | 0.718660793  | -2.328588436 |
| C | -2.521239568 | 1.648597295  | -2.892087054 |
| H | 1.521609261  | 0.891243566  | -1.826687233 |
| C | -1.034388132 | 2.025941963  | -3.072358161 |
| H | -0.223867735 | -0.030610564 | -3.035440584 |
| H | -2.972403583 | 1.4943822    | -3.882090166 |
| C | -0.277757118 | 0.834717632  | -3.69764228  |
| H | -1.524312684 | 4.073655804  | -3.766236519 |
| H | 0.108600068  | 3.52279217   | -4.225090747 |
| C | -0.927113245 | 3.204381171  | -4.060229262 |
| H | -0.812797913 | 0.523791011  | -4.605191273 |
| H | 0.738758433  | 1.114383164  | -4.0023739   |
| H | -1.316587497 | 2.862559664  | -5.029452942 |
| S | -0.644165442 | -2.373549204 | -0.856088629 |
| O | 0.566301481  | -3.137741987 | -1.16671514  |
| O | -1.498991397 | -2.789867187 | 0.267993402  |
| O | -0.349699199 | -0.84660264  | -0.814071458 |
| C | -1.733414913 | -2.541763254 | -2.367811463 |
| F | -2.788395488 | -1.710335934 | -2.280077089 |
| F | -1.044792338 | -2.24960292  | -3.477288481 |
| F | -2.171801148 | -3.795872506 | -2.435838195 |
| N | -2.700566833 | -0.014167814 | 0.350099092  |
| N | -3.748042469 | -0.373383867 | 0.212443574  |

|   |              |             |             |
|---|--------------|-------------|-------------|
| H | -2.163983092 | 2.456974761 | 2.311854839 |
| C | -2.875667843 | 4.320048424 | 4.205668809 |
| N | -3.322644017 | 3.504767083 | 3.226067788 |
| C | -4.639894306 | 3.47717678  | 2.929571053 |
| C | -5.560853669 | 4.278492672 | 3.614257361 |
| C | -5.106741349 | 5.121965471 | 4.626184114 |
| C | -3.745653181 | 5.144413554 | 4.92711536  |
| H | -3.355931585 | 5.790319347 | 5.710072257 |
| H | -5.803707153 | 5.754211328 | 5.172797025 |
| H | -6.615149369 | 4.235133498 | 3.352437527 |
| C | -1.394664518 | 4.304128303 | 4.494096477 |
| H | -1.136518795 | 5.011920552 | 5.288722336 |
| H | -1.070965586 | 3.303892986 | 4.813547584 |
| H | -0.815776599 | 4.569042776 | 3.599420628 |
| C | -5.081355914 | 2.537457977 | 1.836022074 |
| H | -6.142283676 | 2.670656085 | 1.600381498 |
| H | -4.502971028 | 2.701416185 | 0.917485895 |
| H | -4.933444537 | 1.491039406 | 2.135775692 |

---

## Supplementary Methods

**X-ray Crystallography.** Crystallographic data of  $2\cdot7/3\text{C}_4\text{H}_8\text{O}$ ,  $3\cdot1/6\text{C}_6\text{H}_{14}$ , **4**, and  $5\cdot\text{C}_4\text{H}_8\text{O}$  are summarized in [Supplementary Tables 1 and 2](#). Selected bond lengths and angles are summarized in [Supplementary Tables 3–6](#), and their ORTEP drawings are shown in [Supplementary Figures 1–4](#). A preliminary X-ray analysis of  $2\cdot7/3\text{C}_4\text{H}_8\text{O}$  has shown that the chloride (Cl(2) and Cl(3)) and nitride (N(2) and N(3)) atoms bonded to molybdenum atom trans to each other are disordered between two positions in a ratio of 0.75:0.25. A preliminary X-ray analysis of  $3\cdot1/6\text{C}_6\text{H}_{14}$  has shown that there is a two-fold screw axis running through the Cl(1), N(1) and C(1) atoms and that the molybdenum nitride group (Mo(1)-N(2)) is crystallographically disordered between two symmetrical positions with one-half atomic occupancies. Thus, superficial but false elongation of the Mo $\equiv$ N bonds are unavoidable for the crystallographic data of  $2\cdot7/3\text{C}_4\text{H}_8\text{O}$  and  $3\cdot1/6\text{C}_6\text{H}_{14}$ , and their metric features around the molybdenum atoms are indiscussible. Diffraction data were collected at  $-75\text{ }^\circ\text{C}$  ( $2\cdot7/3\text{C}_4\text{H}_8\text{O}$ ,  $3\cdot1/6\text{C}_6\text{H}_{14}$ , and  $5\cdot\text{C}_4\text{H}_8\text{O}$ ) or  $-90\text{ }^\circ\text{C}$  (**4**) on a Rigaku RAXIS RAPID imaging plate area detector with graphite-monochromated Mo K $\alpha$  radiation ( $\lambda = 0.71075\text{ \AA}$ ). Reflections were collected for the  $2\theta$  range of  $5^\circ$  to  $55^\circ$ . Intensity data were corrected for Lorentz-polarization effects and for empirical absorption (ABSCOR for  $2\cdot7/3\text{C}_4\text{H}_8\text{O}$ , **4**, and  $5\cdot\text{C}_4\text{H}_8\text{O}$ ) or numerical absorption (NUMABS for  $3\cdot1/6\text{C}_6\text{H}_{14}$ ). The structure solution and refinements were carried out by using the *CrystalStructure* crystallographic software package.<sup>1</sup> The positions of the non-hydrogen atoms were determined by direct methods (SHELX-97<sup>2</sup>) and subsequent Fourier syntheses (DIRDIF-99<sup>3</sup>), and were refined  $F_o^2$  using all unique reflections by full-matrix least-squares with anisotropic thermal parameters except for all the THF molecules in  $2\cdot7/3\text{C}_4\text{H}_8\text{O}$ , and one methyl carbon atom (C(4)) and hexane carbon atoms (C(13) and C(14)) in  $3\cdot1/6\text{C}_6\text{H}_{14}$ . Location of the imide hydrogen atom (H49) of  $5\cdot\text{C}_4\text{H}_8\text{O}$  was found in a difference Fourier map and was refined isotropically, while all the other hydrogen atoms except for those in THF and hexane molecules in  $2\cdot7/3\text{C}_4\text{H}_8\text{O}$  and  $3\cdot1/6\text{C}_6\text{H}_{14}$  were placed at the calculated positions with fixed isotropic parameters.

For the crystallographic data of  $2\cdot7/3\text{C}_4\text{H}_8\text{O}$ , one THF molecule is disordered between two positions (O(2)-C(28)-C(29)-C(30)-C(31) and O(3)-C(32)-C(33)-C(34)-C(35)) and were refined

with one-half occupancies. Other two THF molecules containing O(4) and O(5) atoms are disordered around two three-fold rotoinversion axes, where one-sixth moiety of five non-hydrogen atoms were solved with one oxygen atom, where its atomic occupancy is given as two thirds (32 electrons for non-hydrogen atoms in THF, divided by 6 asymmetric units, divided by 8 electrons for one oxygen atom). The total number of THF molecules per complex **2** is calculated as seven thirds (one for O(1), two halves for those containing O(2) and O(3) , and two sixths for those containing O(4) and O(5)). Consequently, the total void space is filled with the THF molecules.

For the crystallographic data of  $3 \cdot 1/6 C_6H_{14}$ , one methyl carbon atom (C(4)) was disordered and solved with isotropic thermal parameters. Thus, the alert level B errors (PLAT201\_ALERT\_2\_B Isotropic non-H Atoms in Main Residue(s) ..... 1) is not avoidable. A hexane molecule consisting of C(13) and C(14) atoms appears as a disorder to form a linearly extended carbon chains along the *c*-axis in  $3 \cdot 1/6 C_6H_{14}$ , where their atomic occupancies were given as one third, corresponding to one-sixth hexane molecule per complex **3**.

For the crystallographic data of **4**, the maximum residual peak exists very near to the molybdenum atom (0.910 Å), thus the alert level B errors (DIFMX01\_ALERT\_2\_B The maximum difference density is > 0.1\*ZMAX\*1.00\_refine\_diff\_density\_max given = 4.700 and PLAT097\_ALERT\_2\_B Large Reported Max. (Positive) Residual Density 4.70 eÅ<sup>-3</sup>) are not avoidable.

## Computational details

### Three possible reaction pathways for formation of the six-coordinate imide complex **XIII**.

Because the formation of the six-coordinate imide complex **XIII** involves three elementary steps, protonation, reduction, and N<sub>2</sub> coordination, there are three reaction pathways, Paths E, F, and G, to be considered ([Supplementary Figure 5](#)). Details in Path E are discussed in the main text. In Path F, protonation of the nitride complex **XI** gives a cationic five-coordinate imide complex **XXII**. Dinitrogen attacks the vacant coordination site in **XXII** to give a cationic six-coordinate imide complex **XXIII**, and then the generated **XXIII** is reduced to give **XIII**. In Path G, dinitrogen first coordinates to **XI** to afford a six-coordinate nitride complex **XXIV** and then protonated. In all the pathways, the protonation step is found to be slightly endothermic, followed by a highly exothermic reduction step. The coordination of dinitrogen is also possible at room temperature.



## Supplementary References

- (1) *CrystalStructure 3.80: Single Crystal Structure Analysis Software*; Rigaku Corp: Tokyo, Japan, and MSC: The Woodlands, TX, pp 2000–2007.
- (2) Sheldrick, G. M. *SHELX-97: Program for the Refinement of Crystal Structure*; University of Göttingen: Göttingen, Germany, 1997.
- (3) Beurskens, P. T., Beurskens, G., de Gelder, R., García-Granda, S., Gould, R. O., Israël, R. & Smits, J. M. M. *The DIRDIF-99 Program System*; Crystallography Laboratory, University of Nijmegen: Nijmegen, The Netherlands, 1999.
